# Supplementary material for: Variation in ubiquitin system genes creates substrate-specific effects on proteasomal protein degradation
Source: eLife journal article supplement (doi:10.7554/elife.79570), 2022-10-11

### Ala N-end TFT

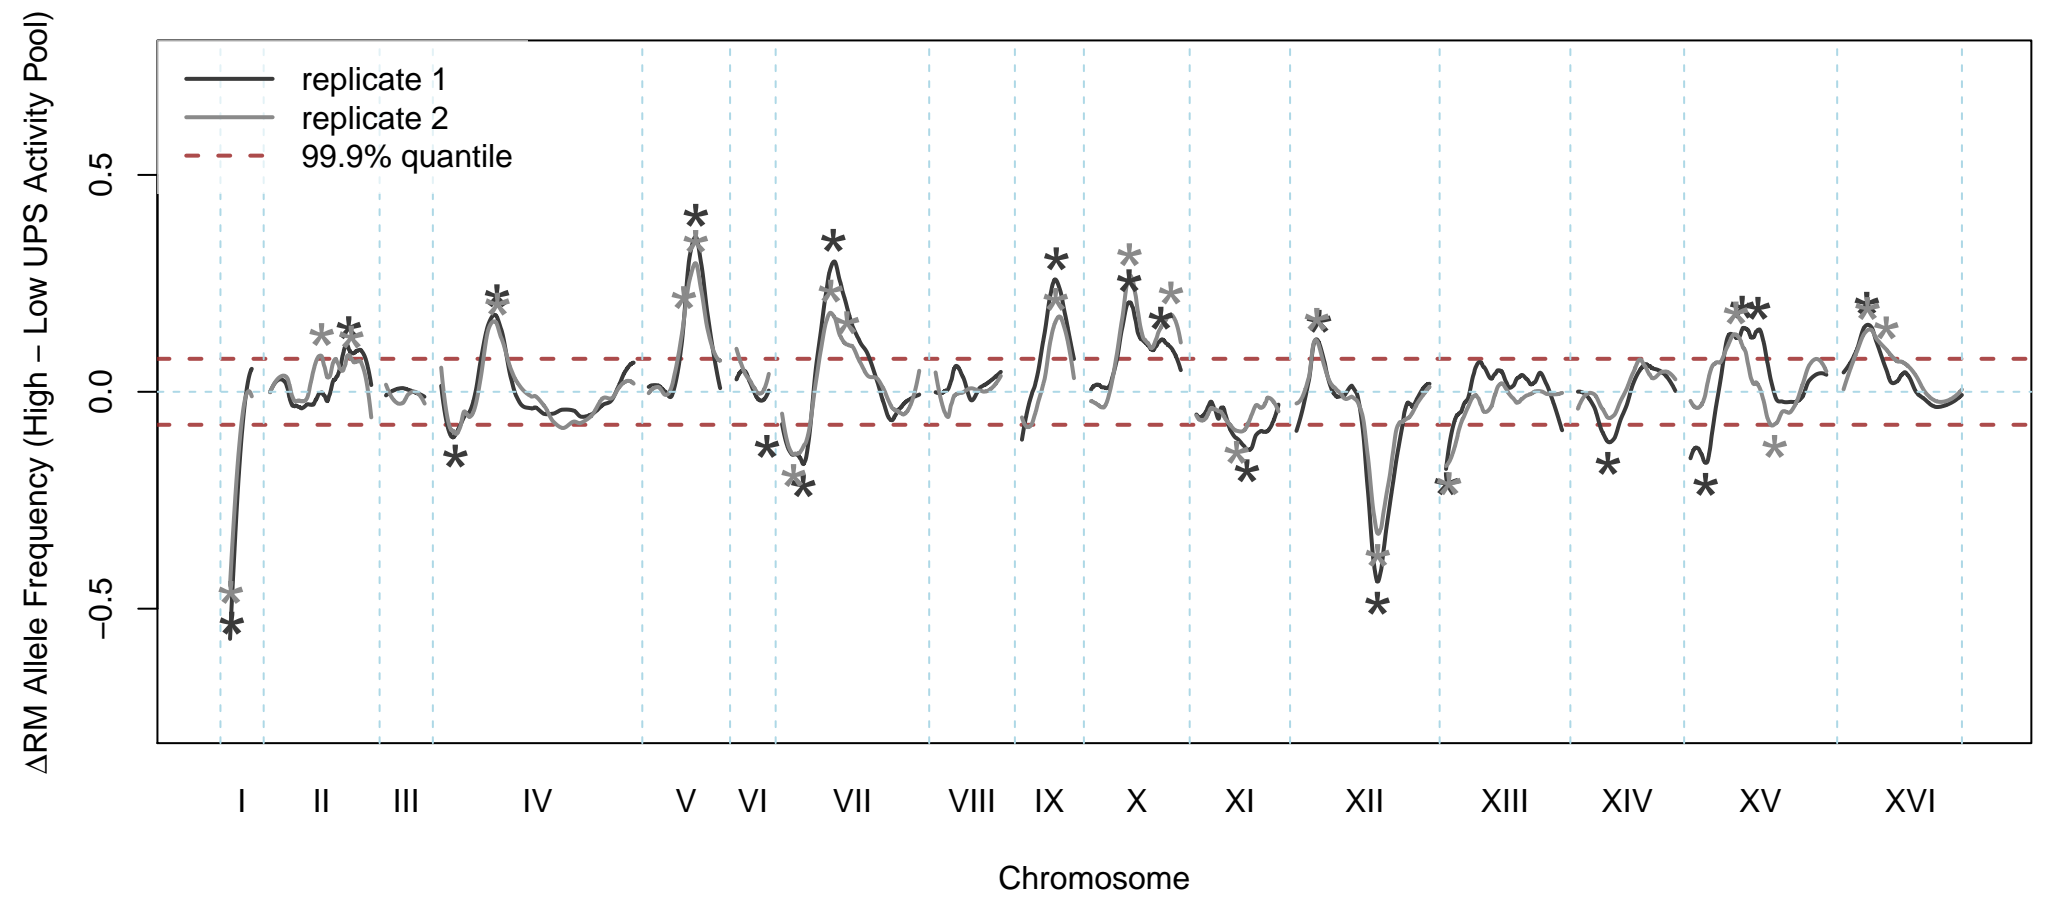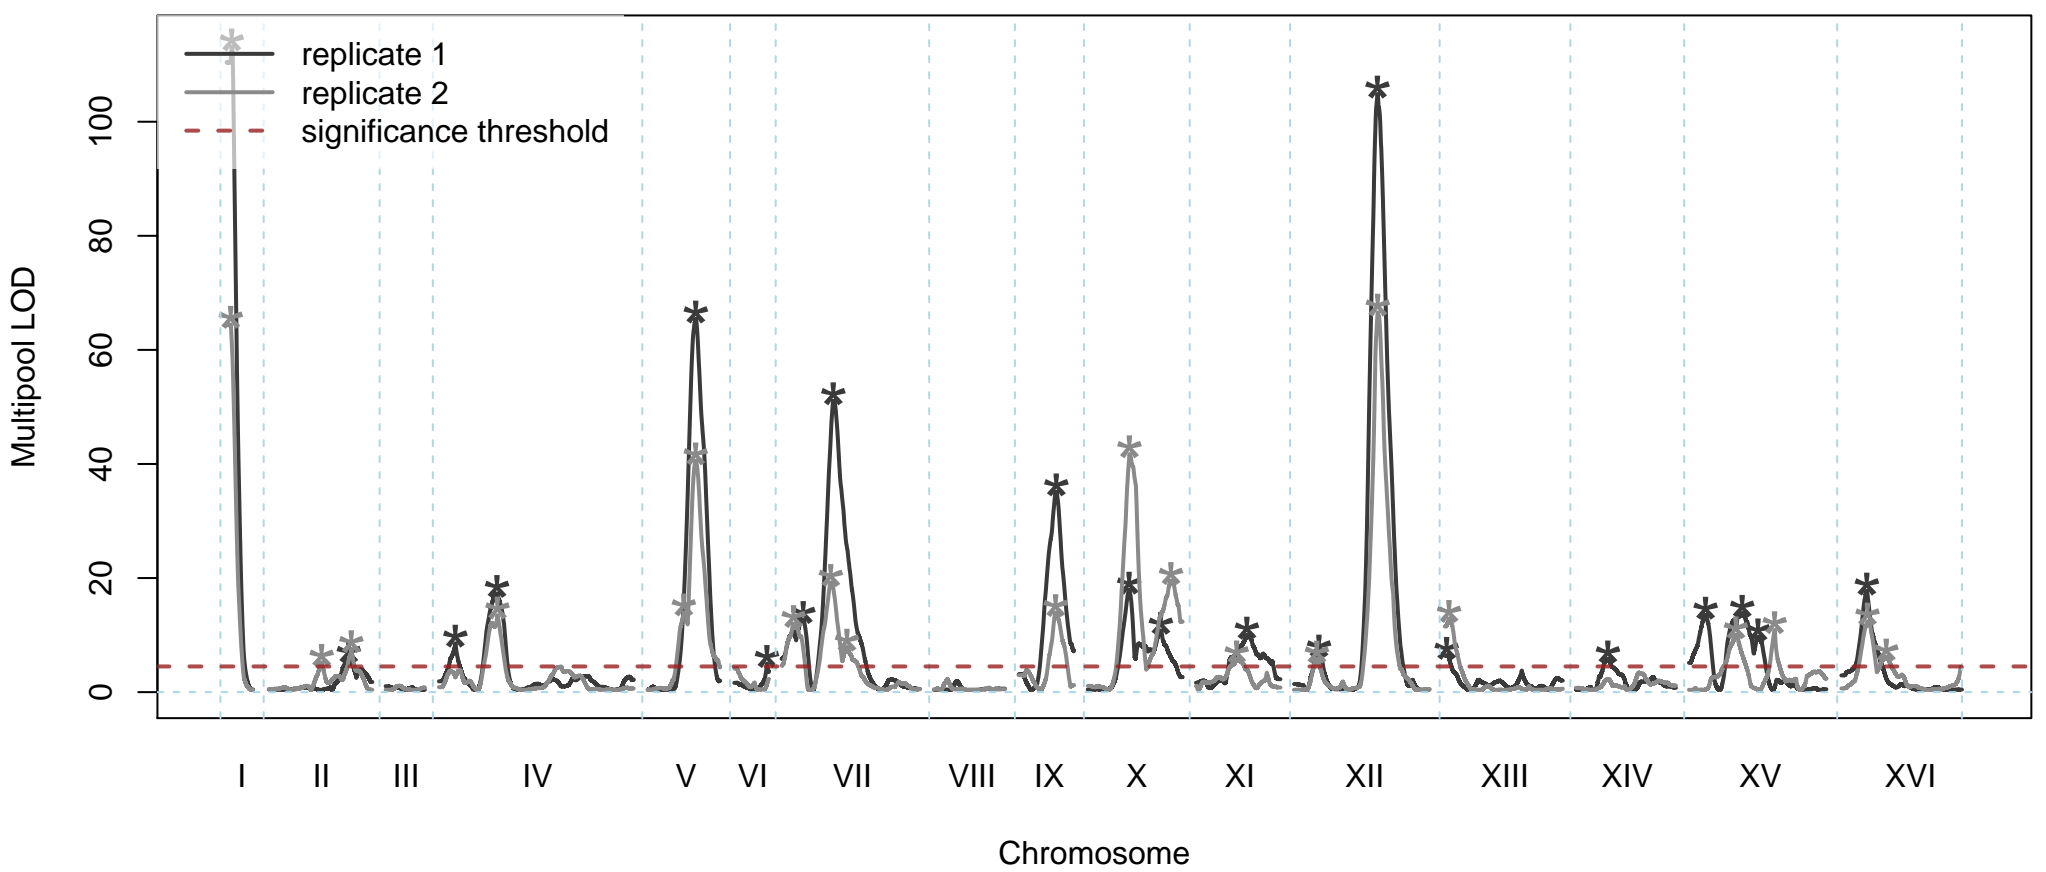

### Arg N-end TFT

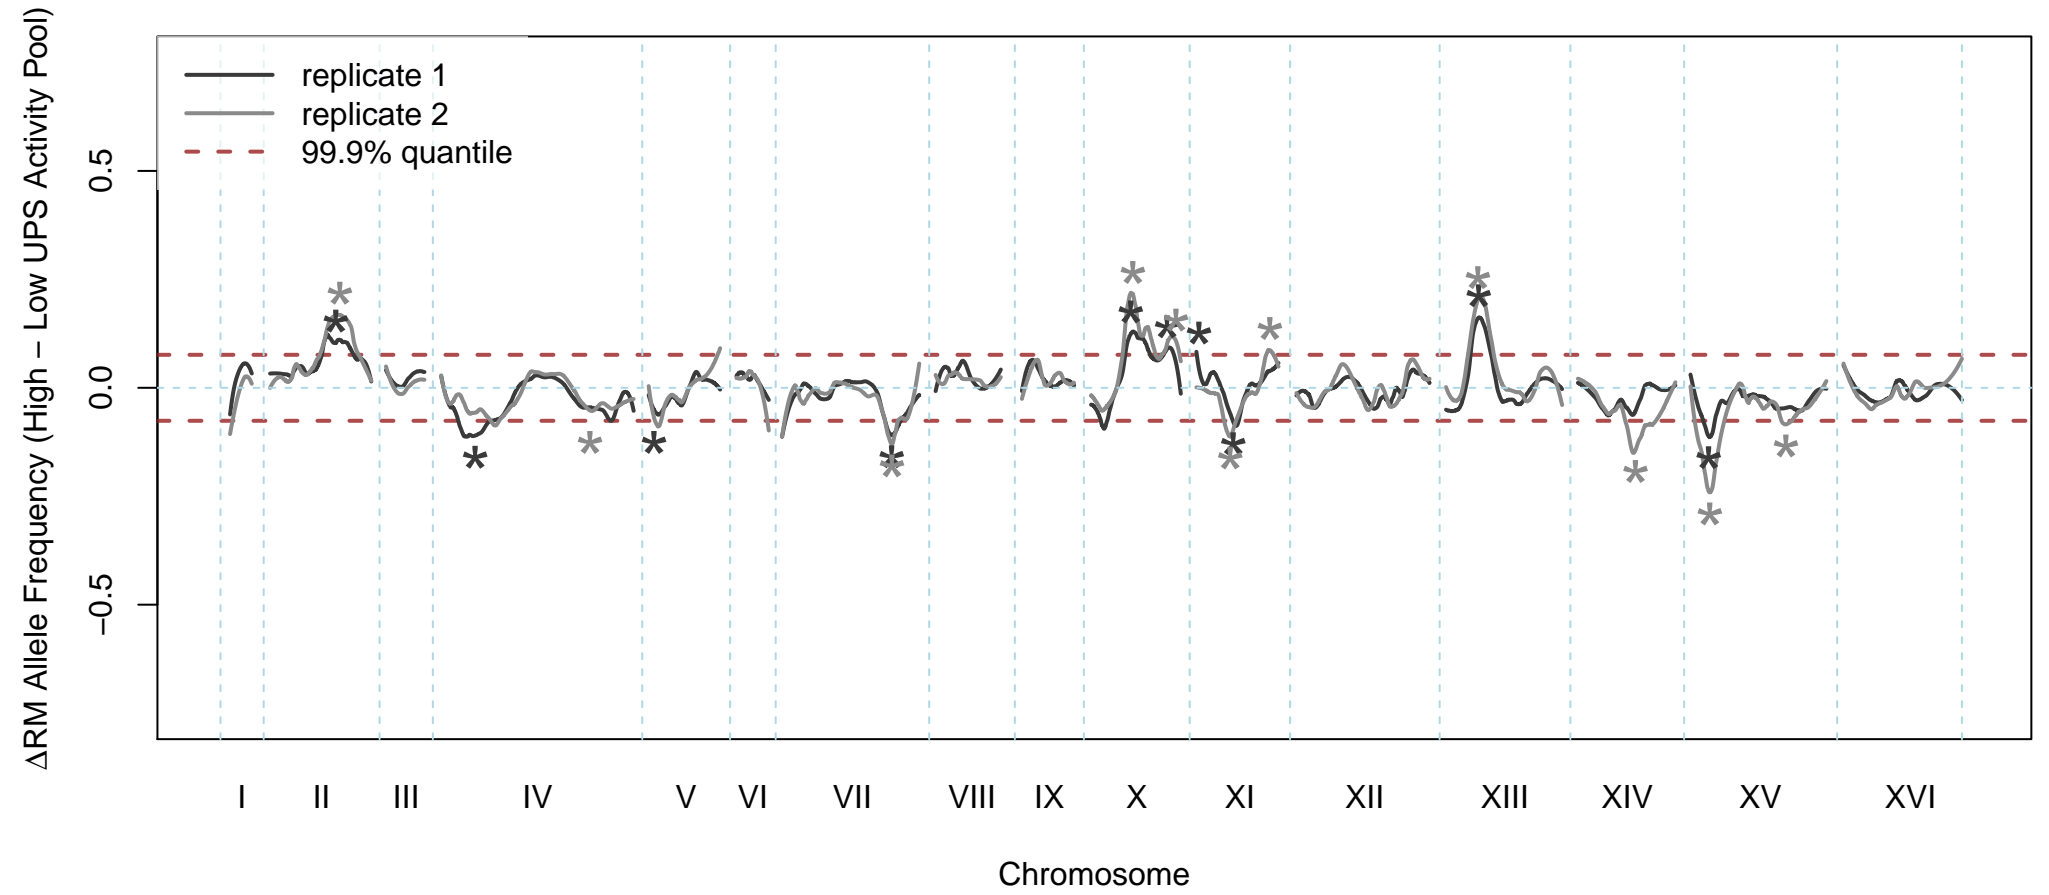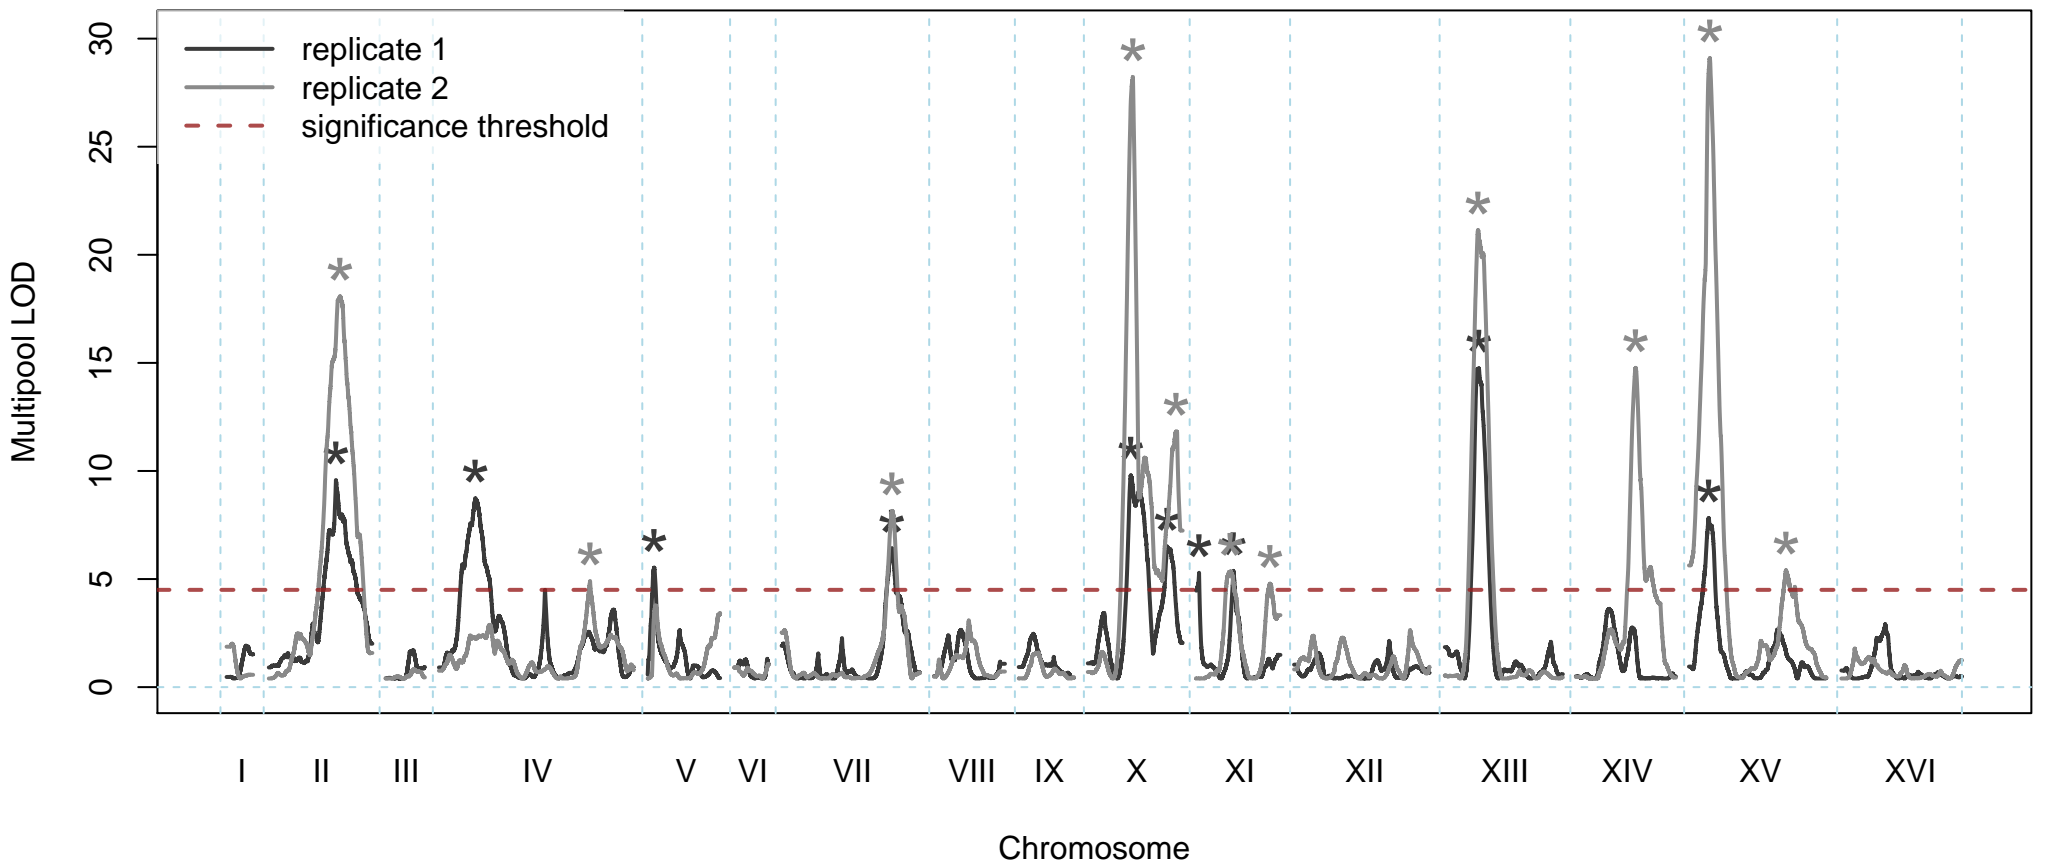

### Asn N-end TFT

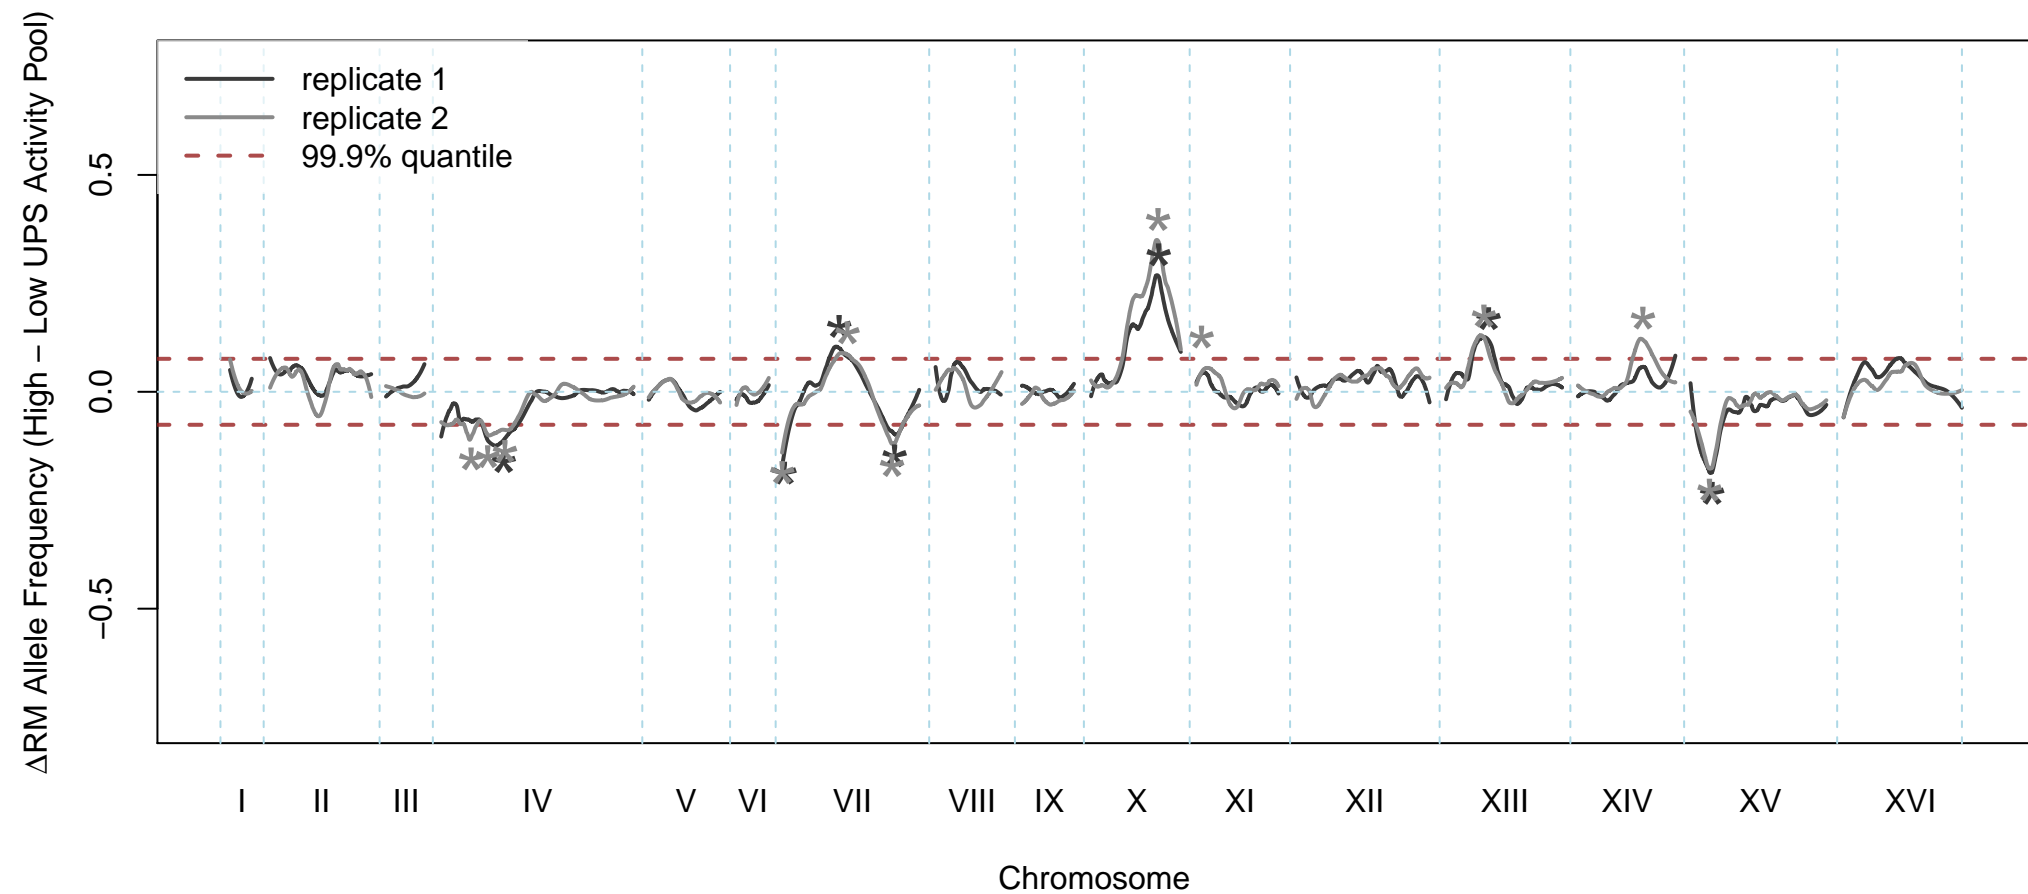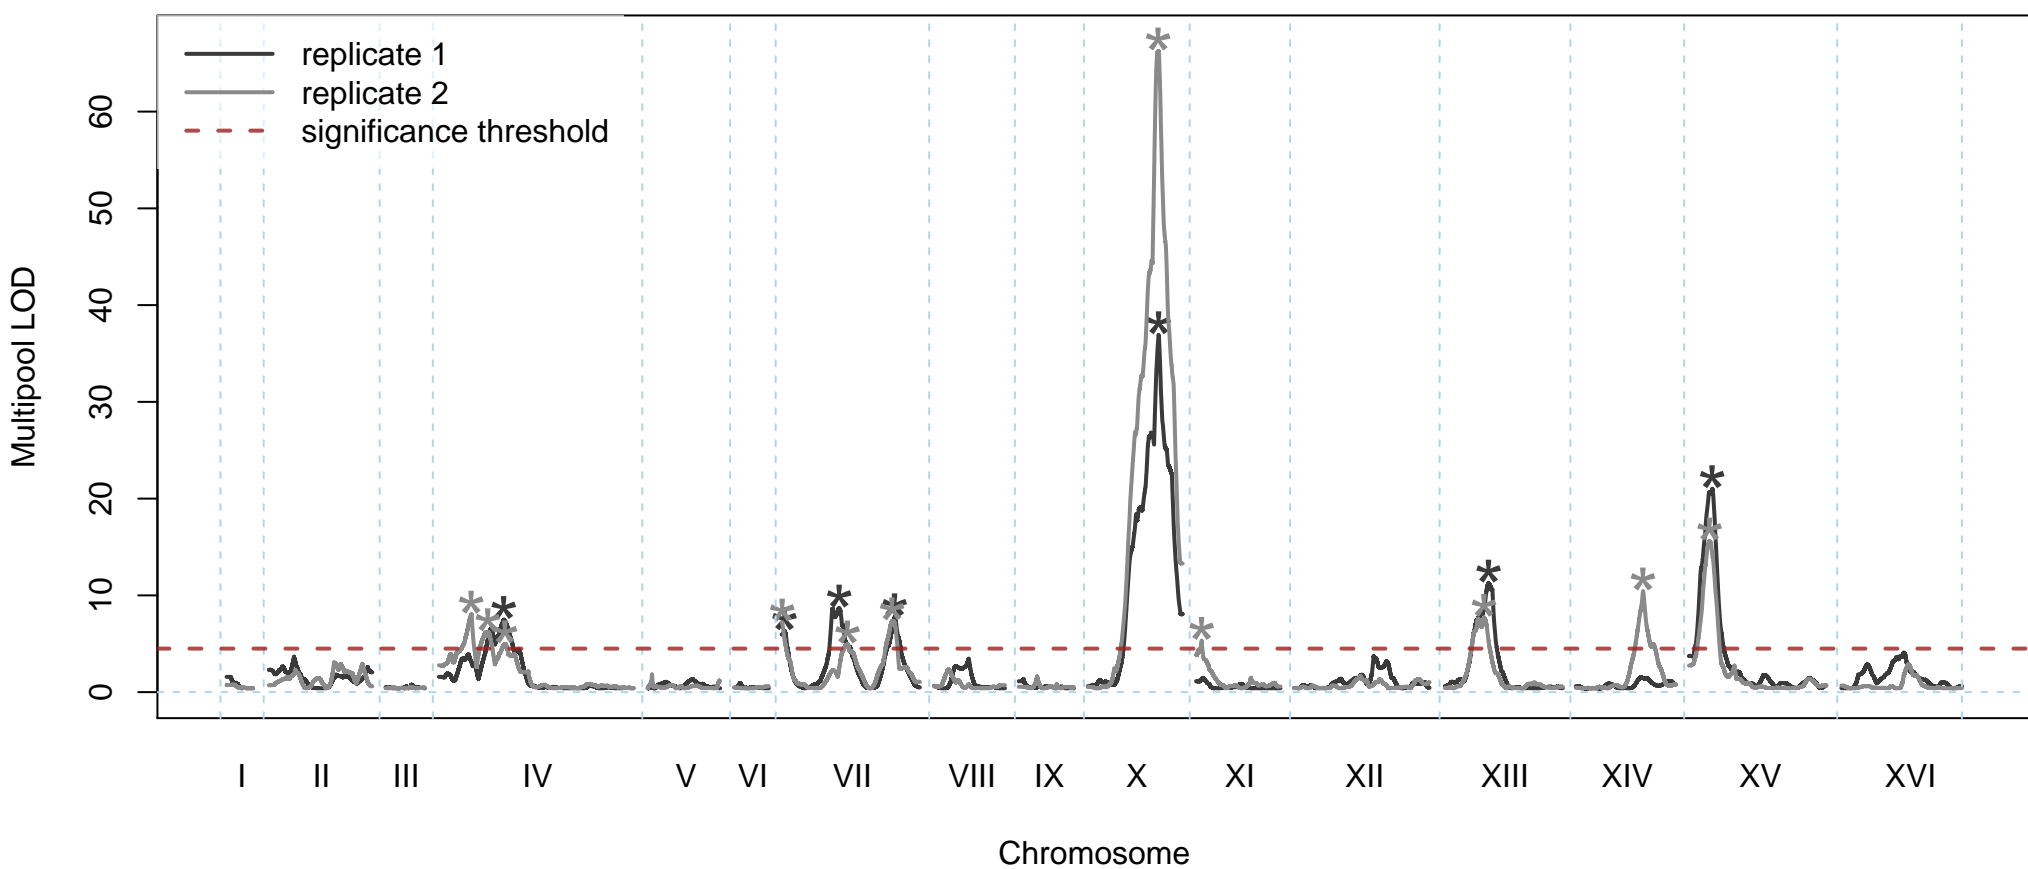

### Asp N-end TFT

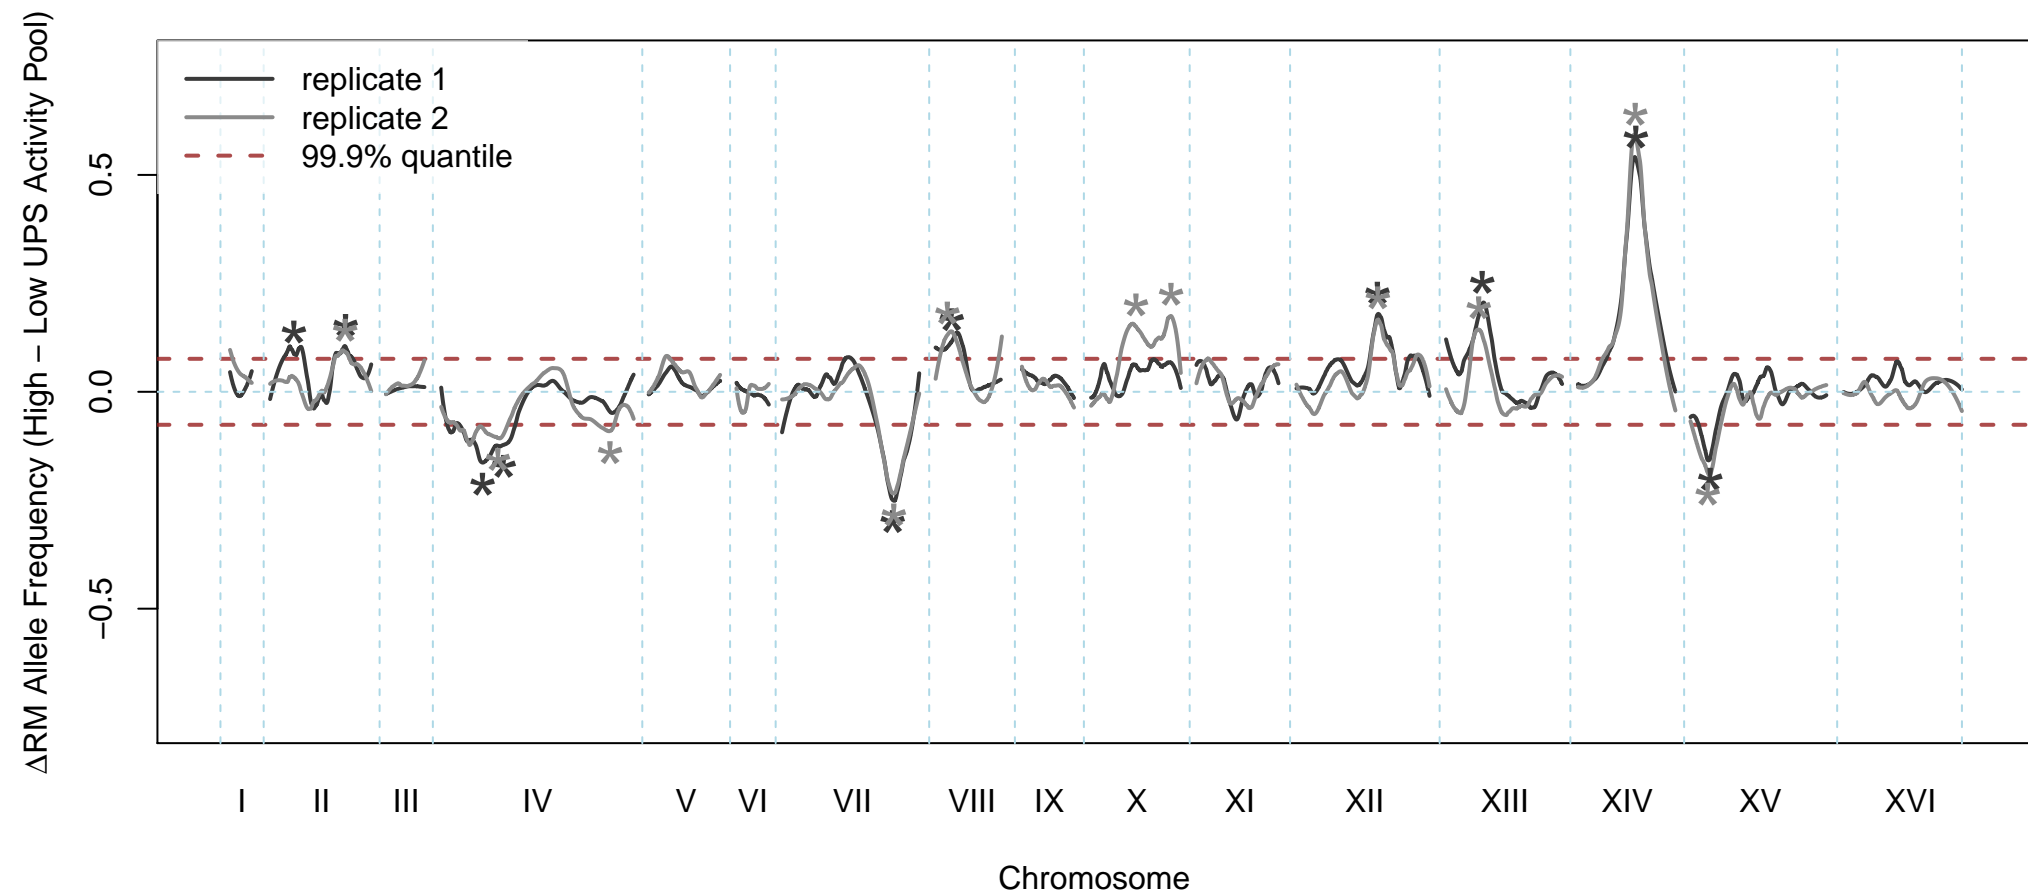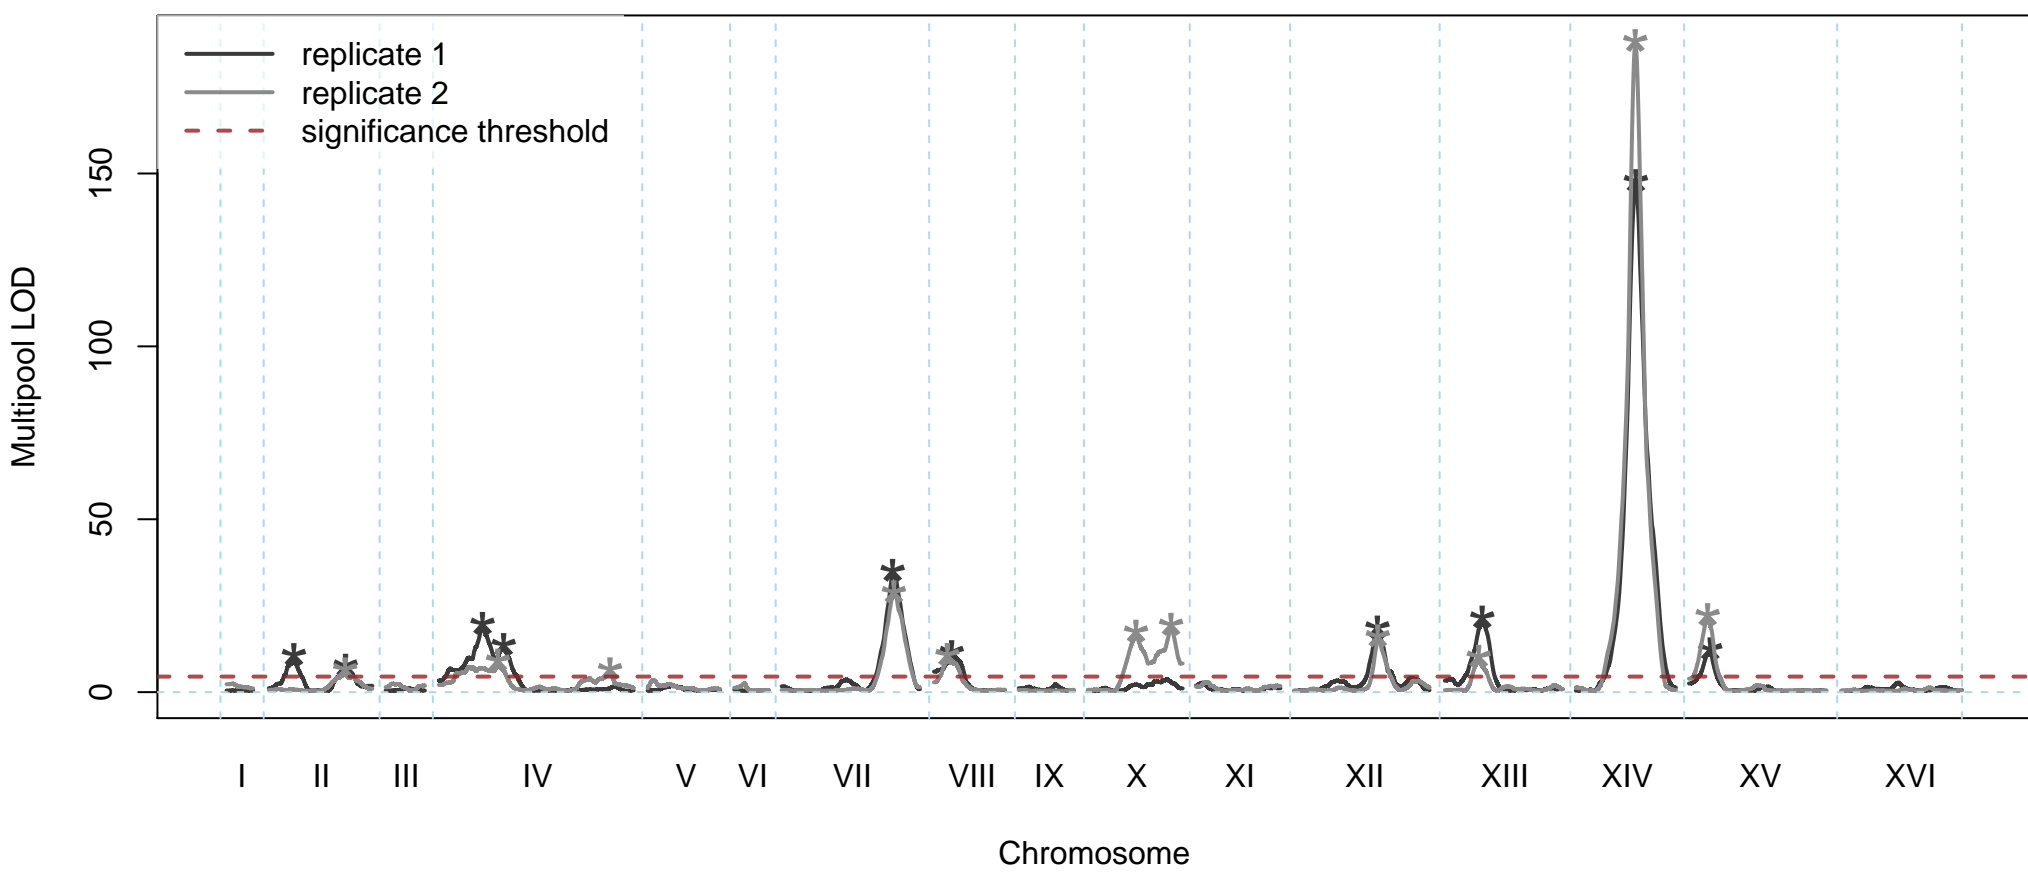

### Cys N-end TFT

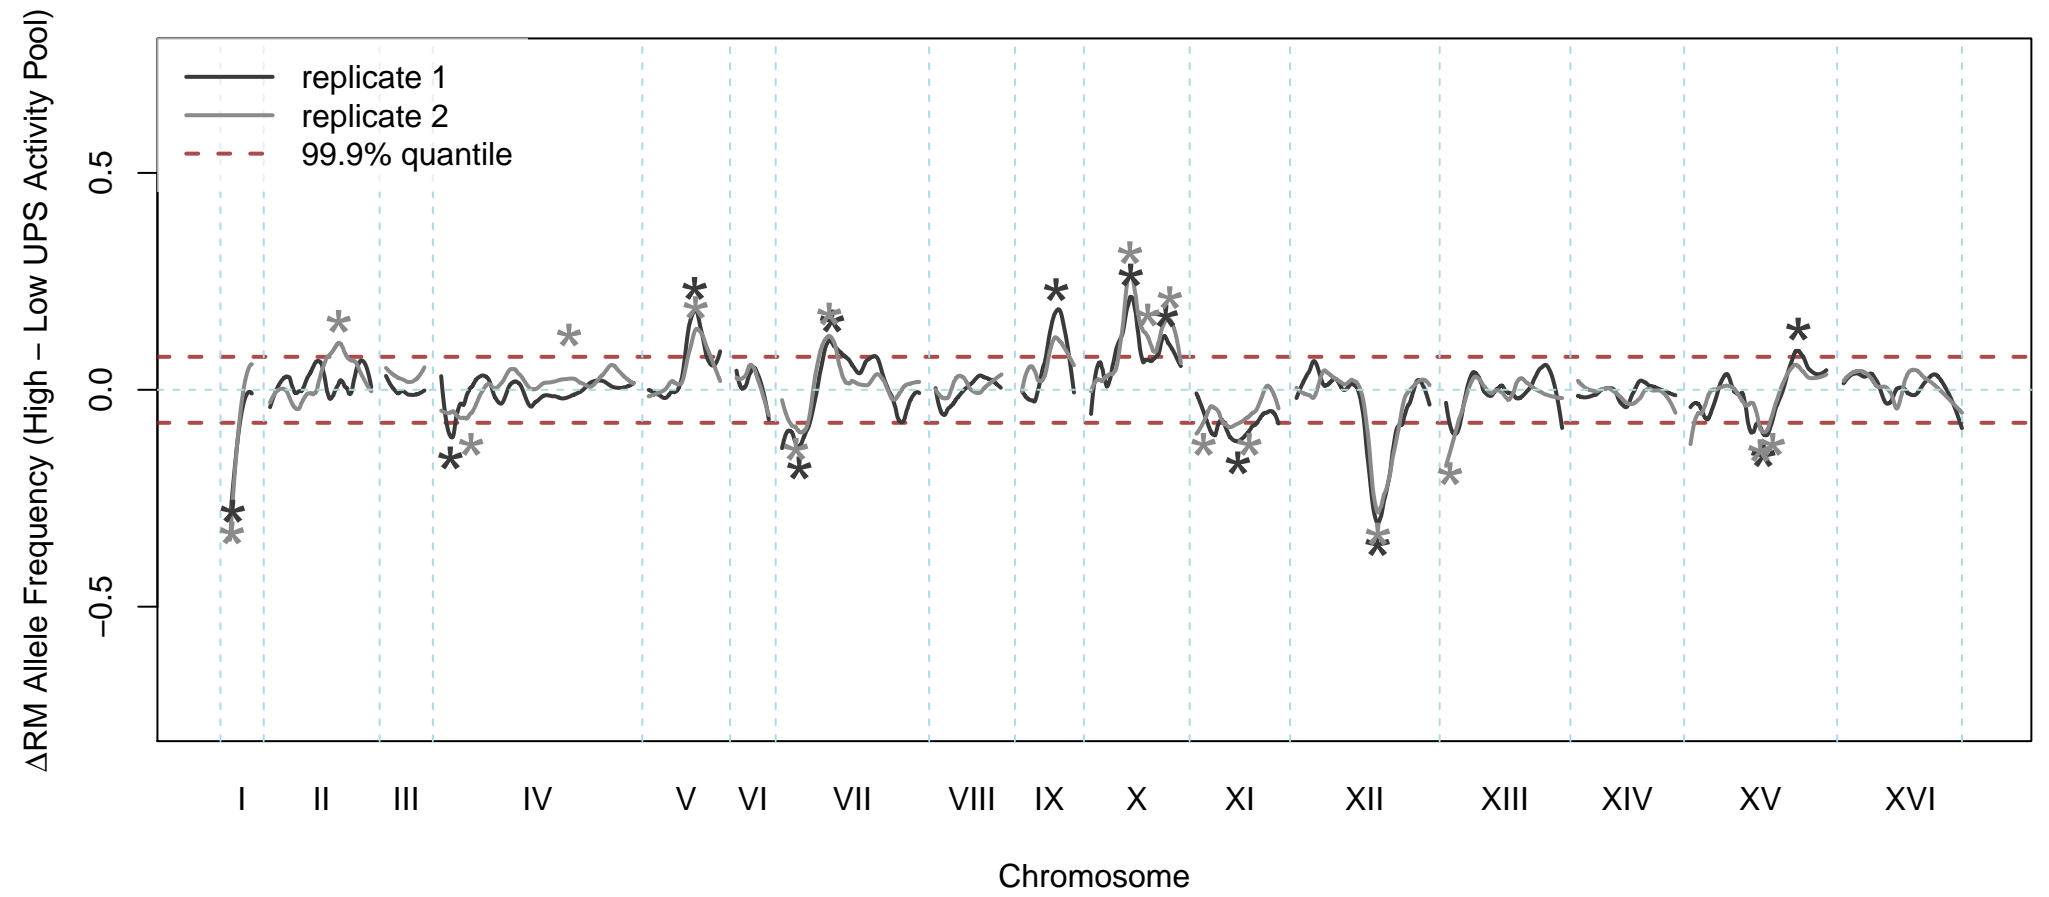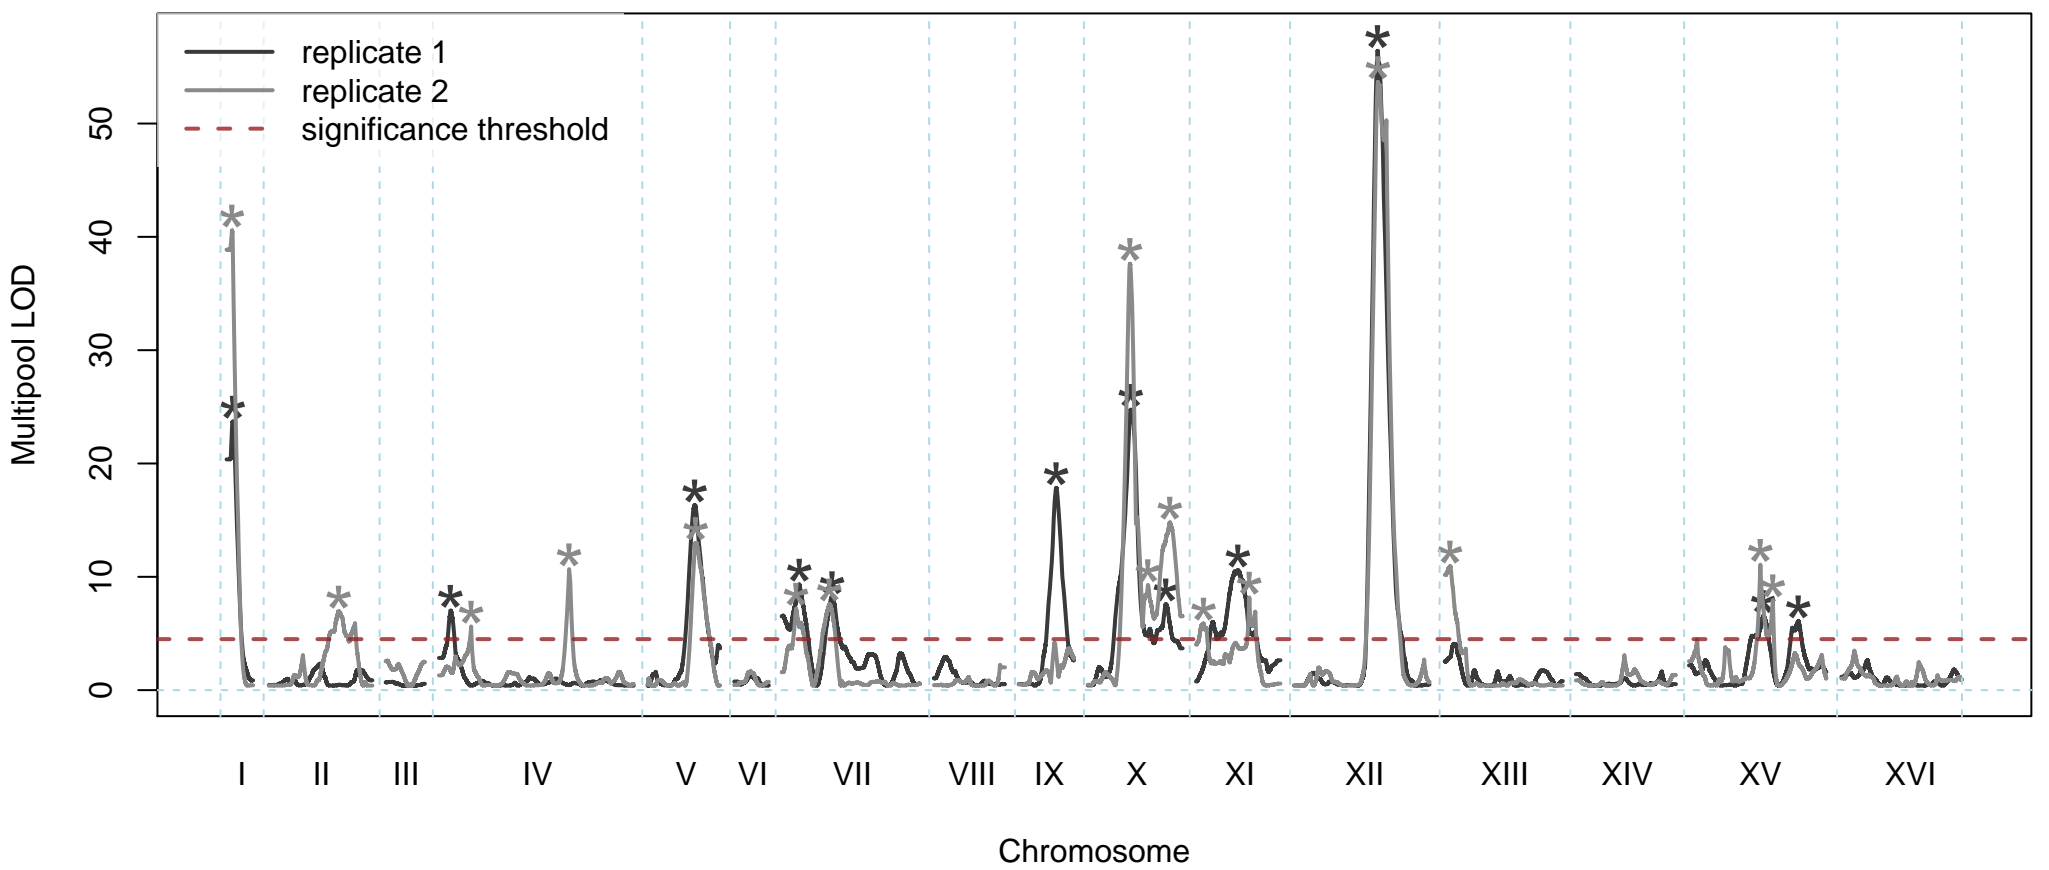

### Gln N-end TFT

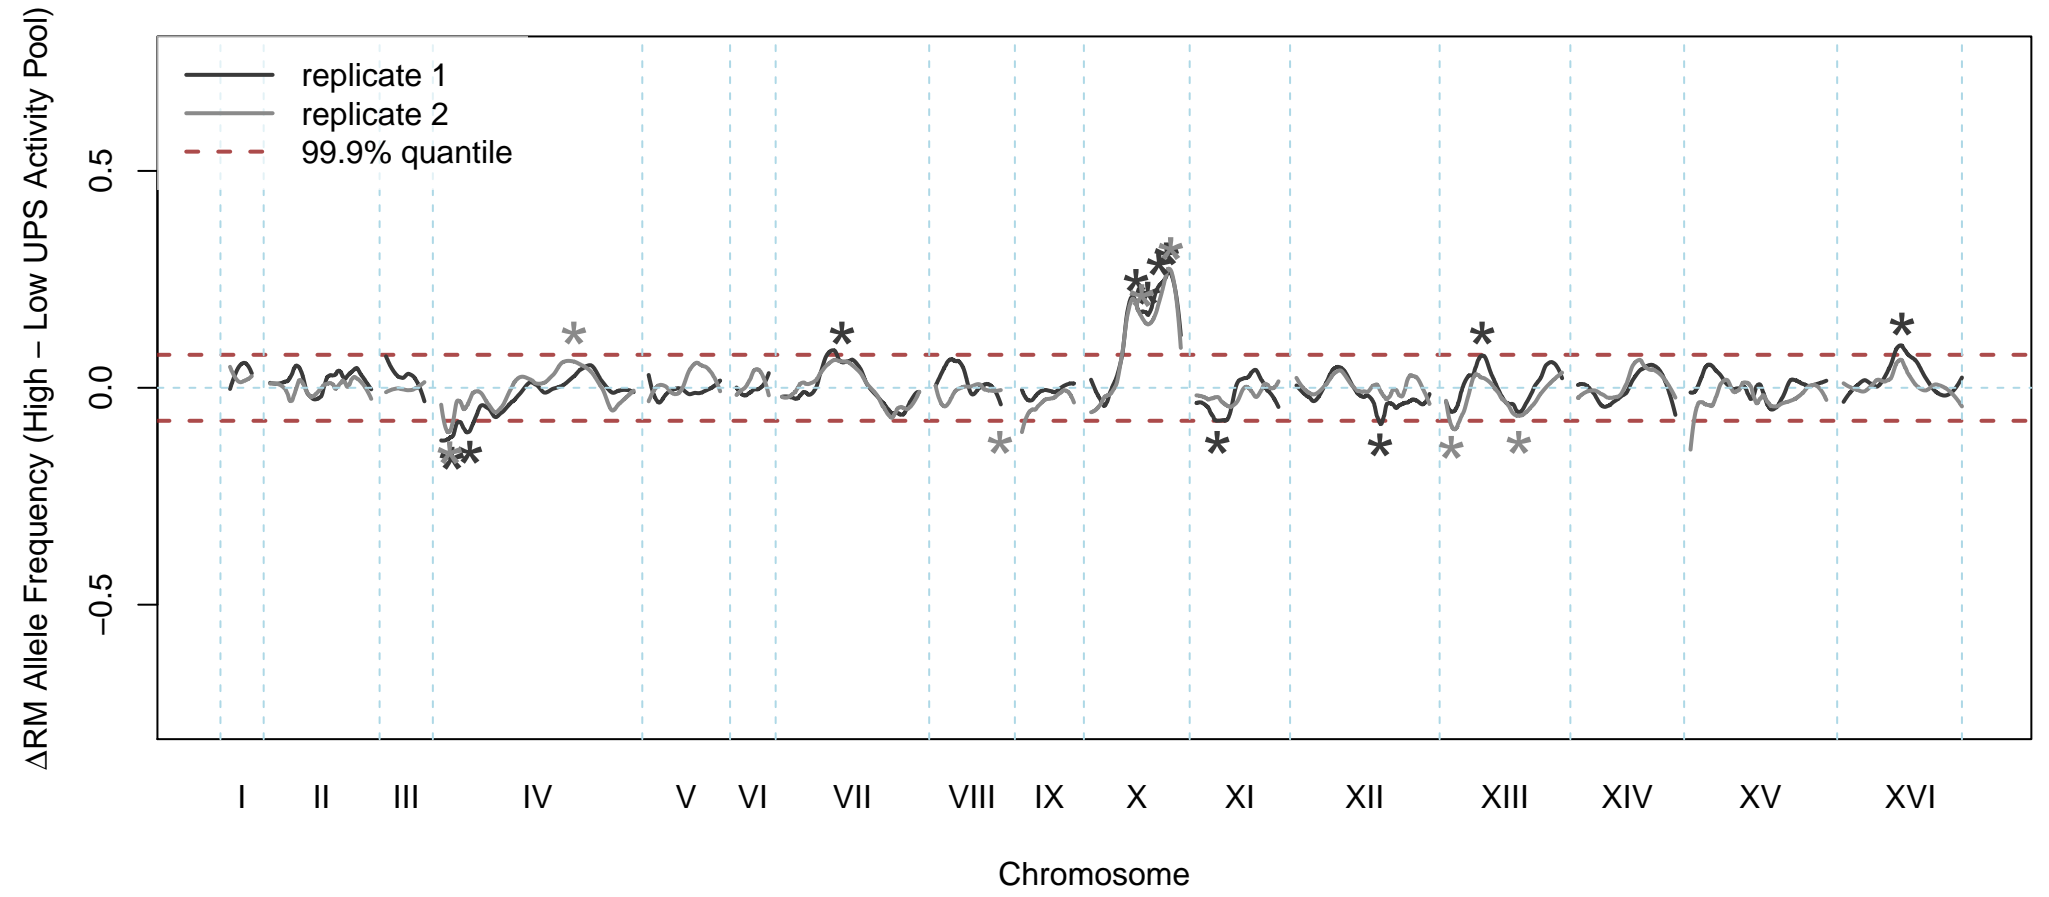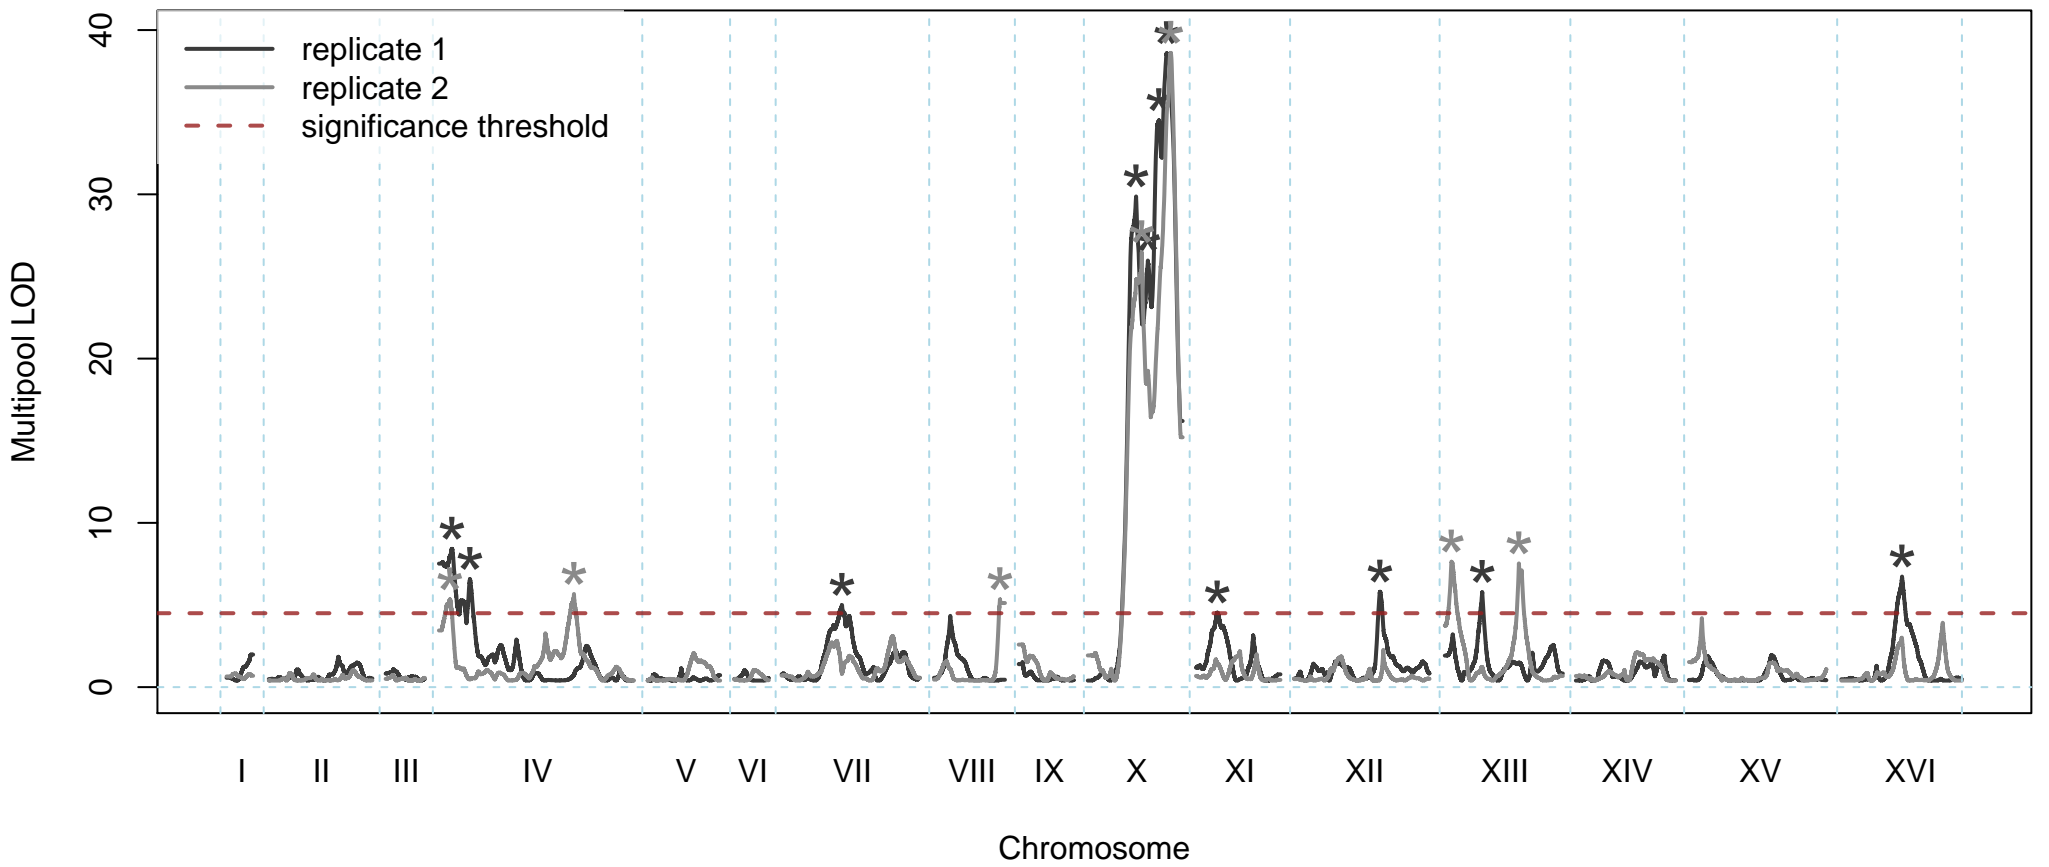

### Glu N-end TFT

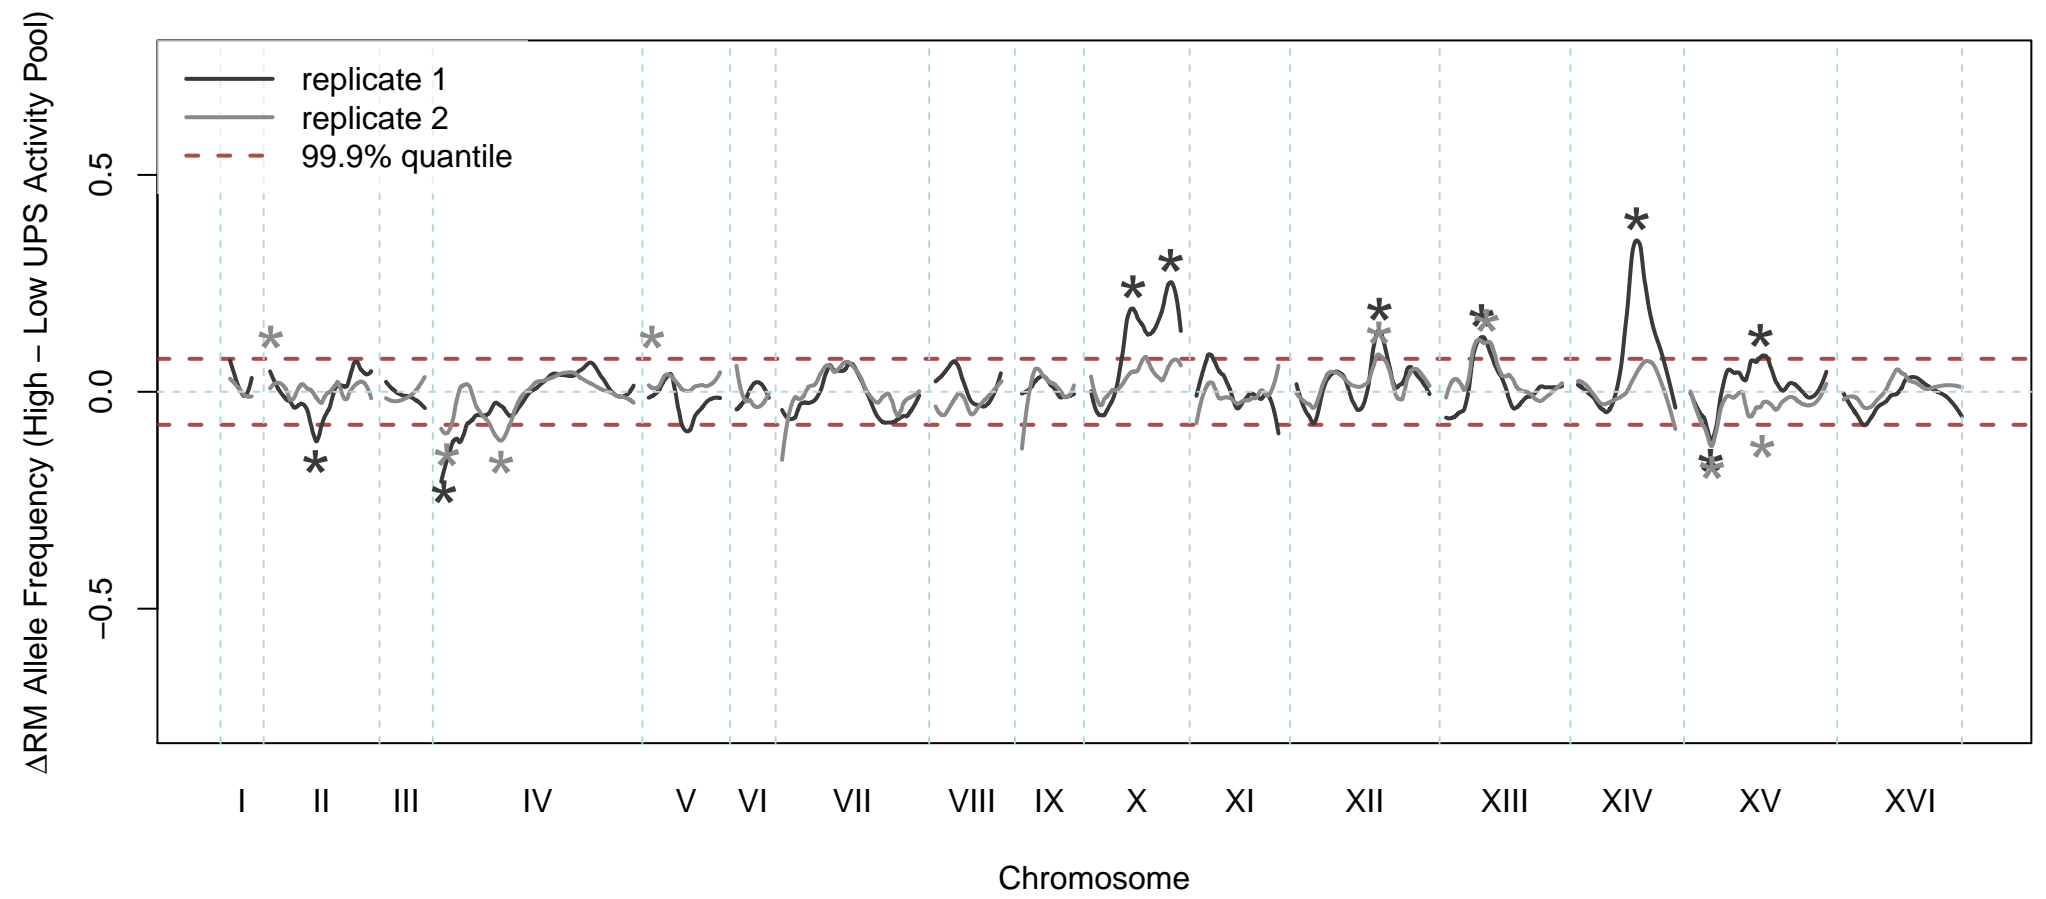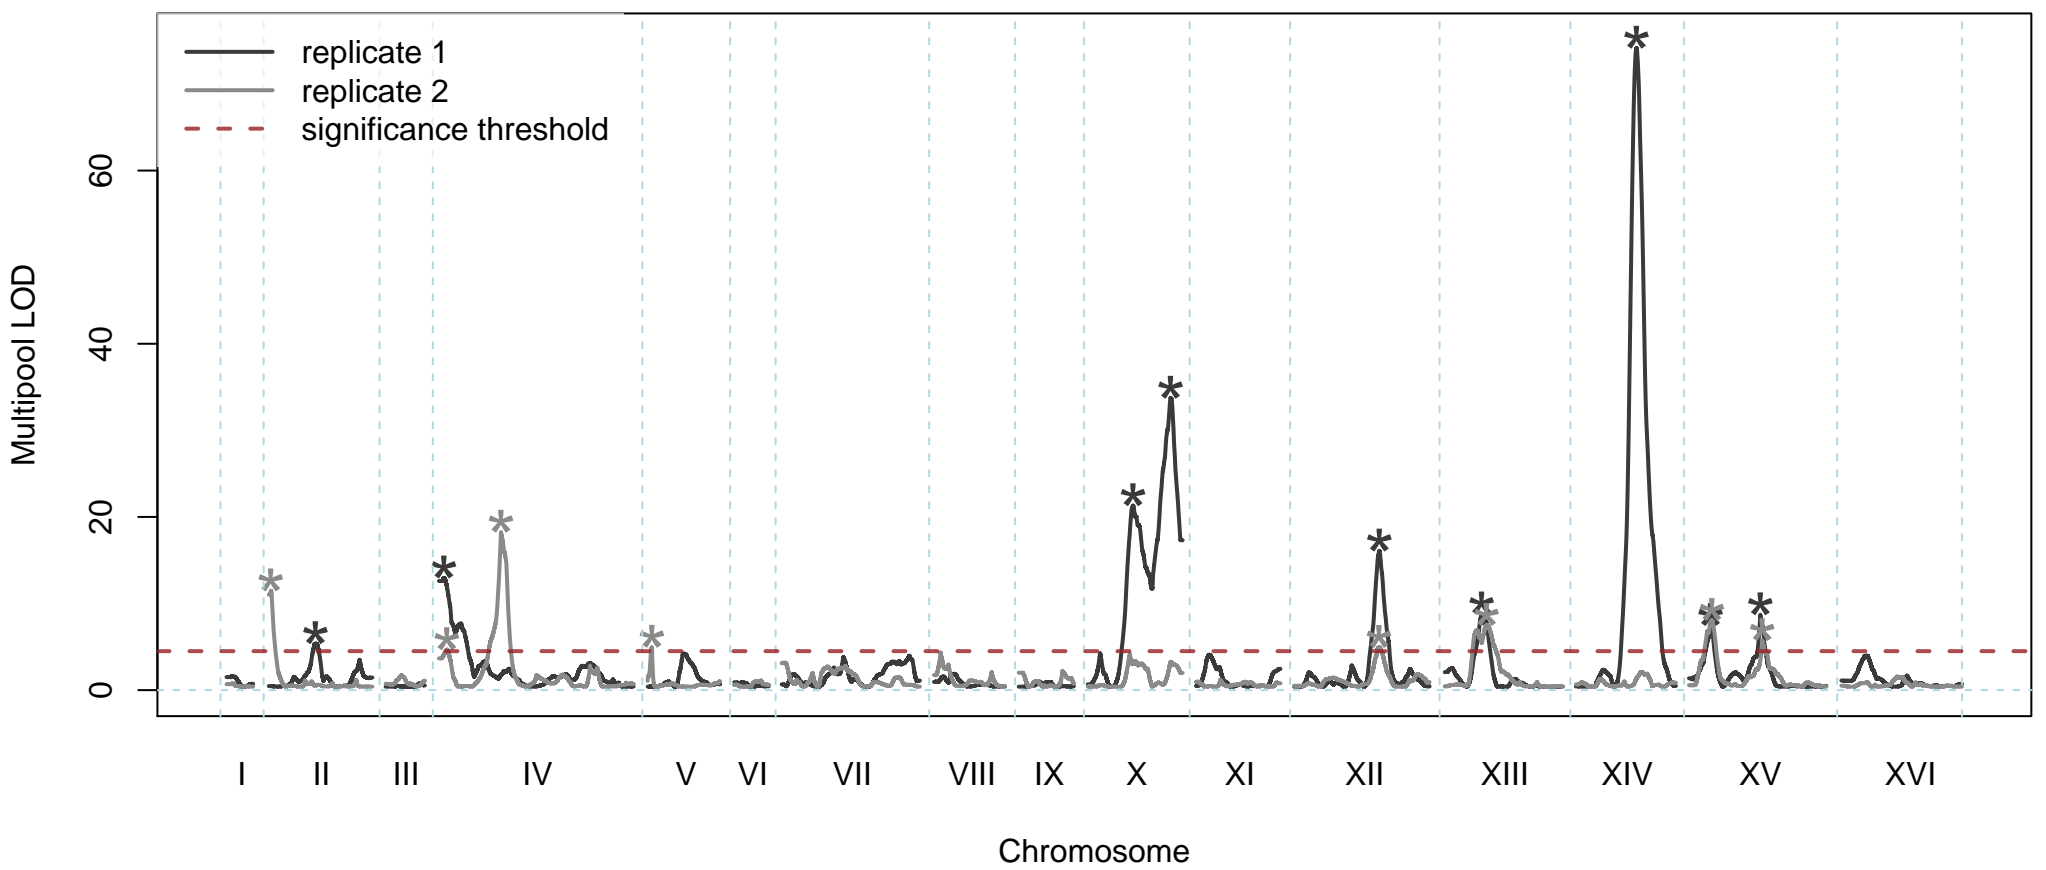

### Gly N-end TFT

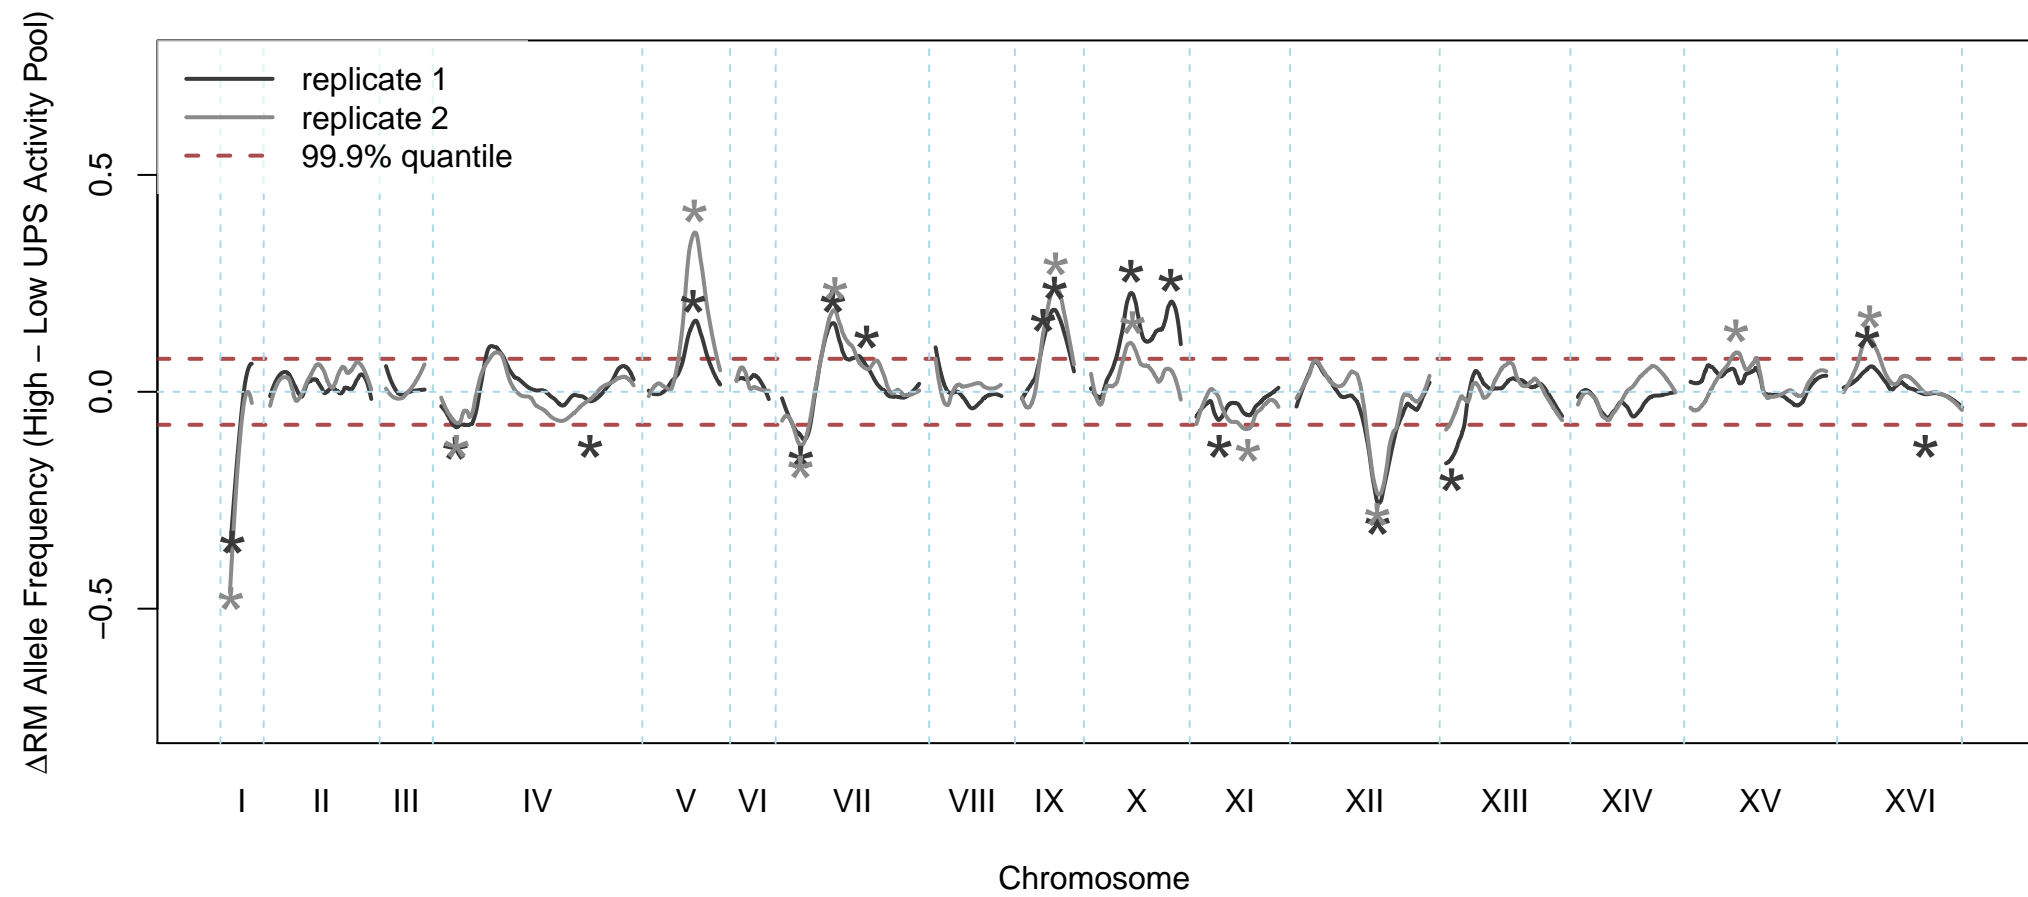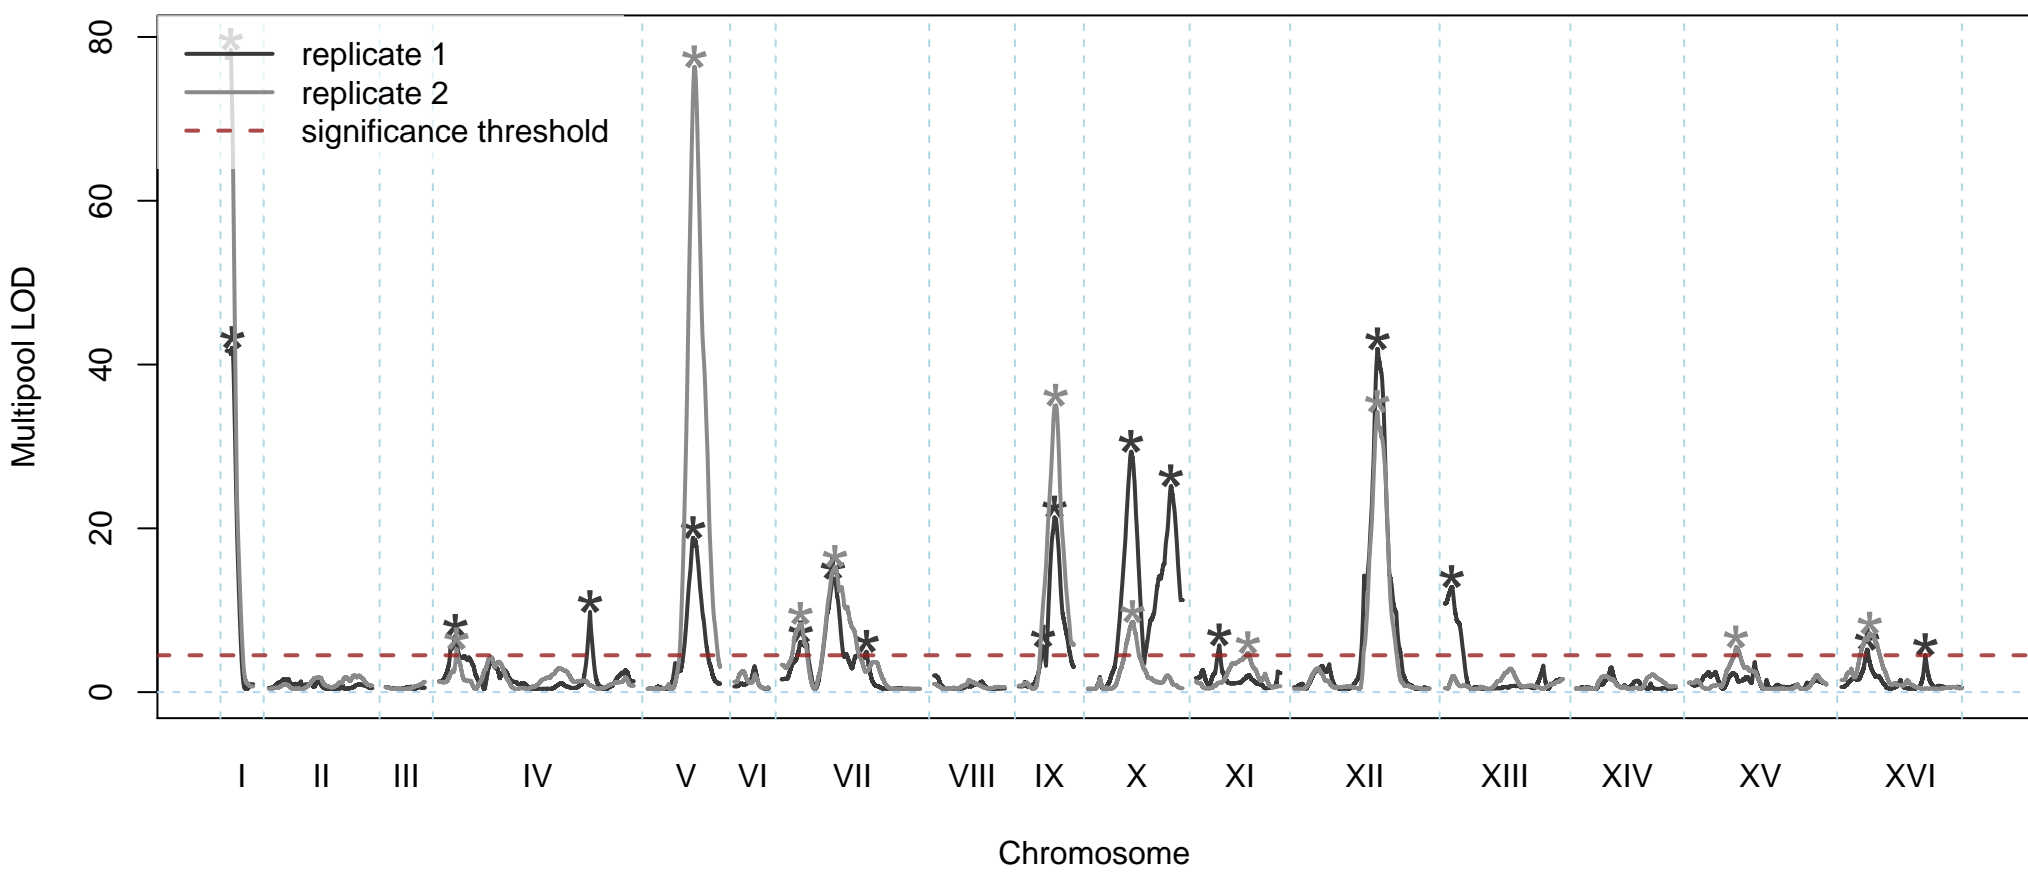



### His N-end TFT

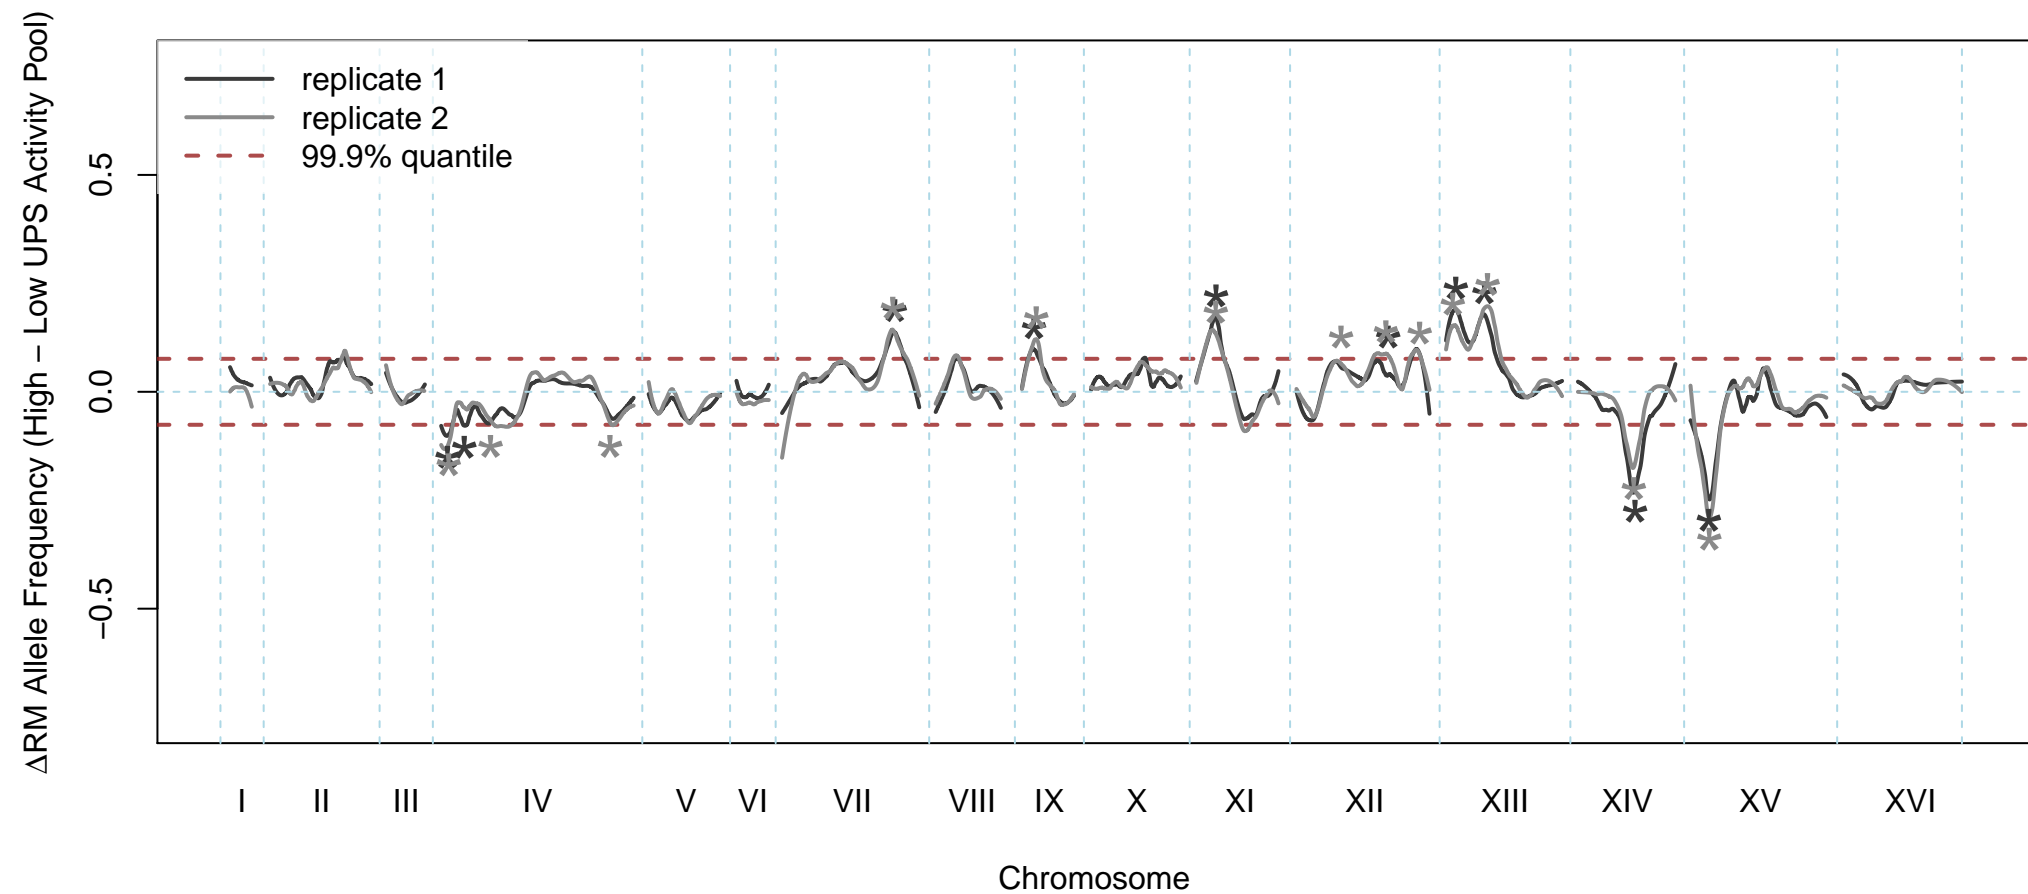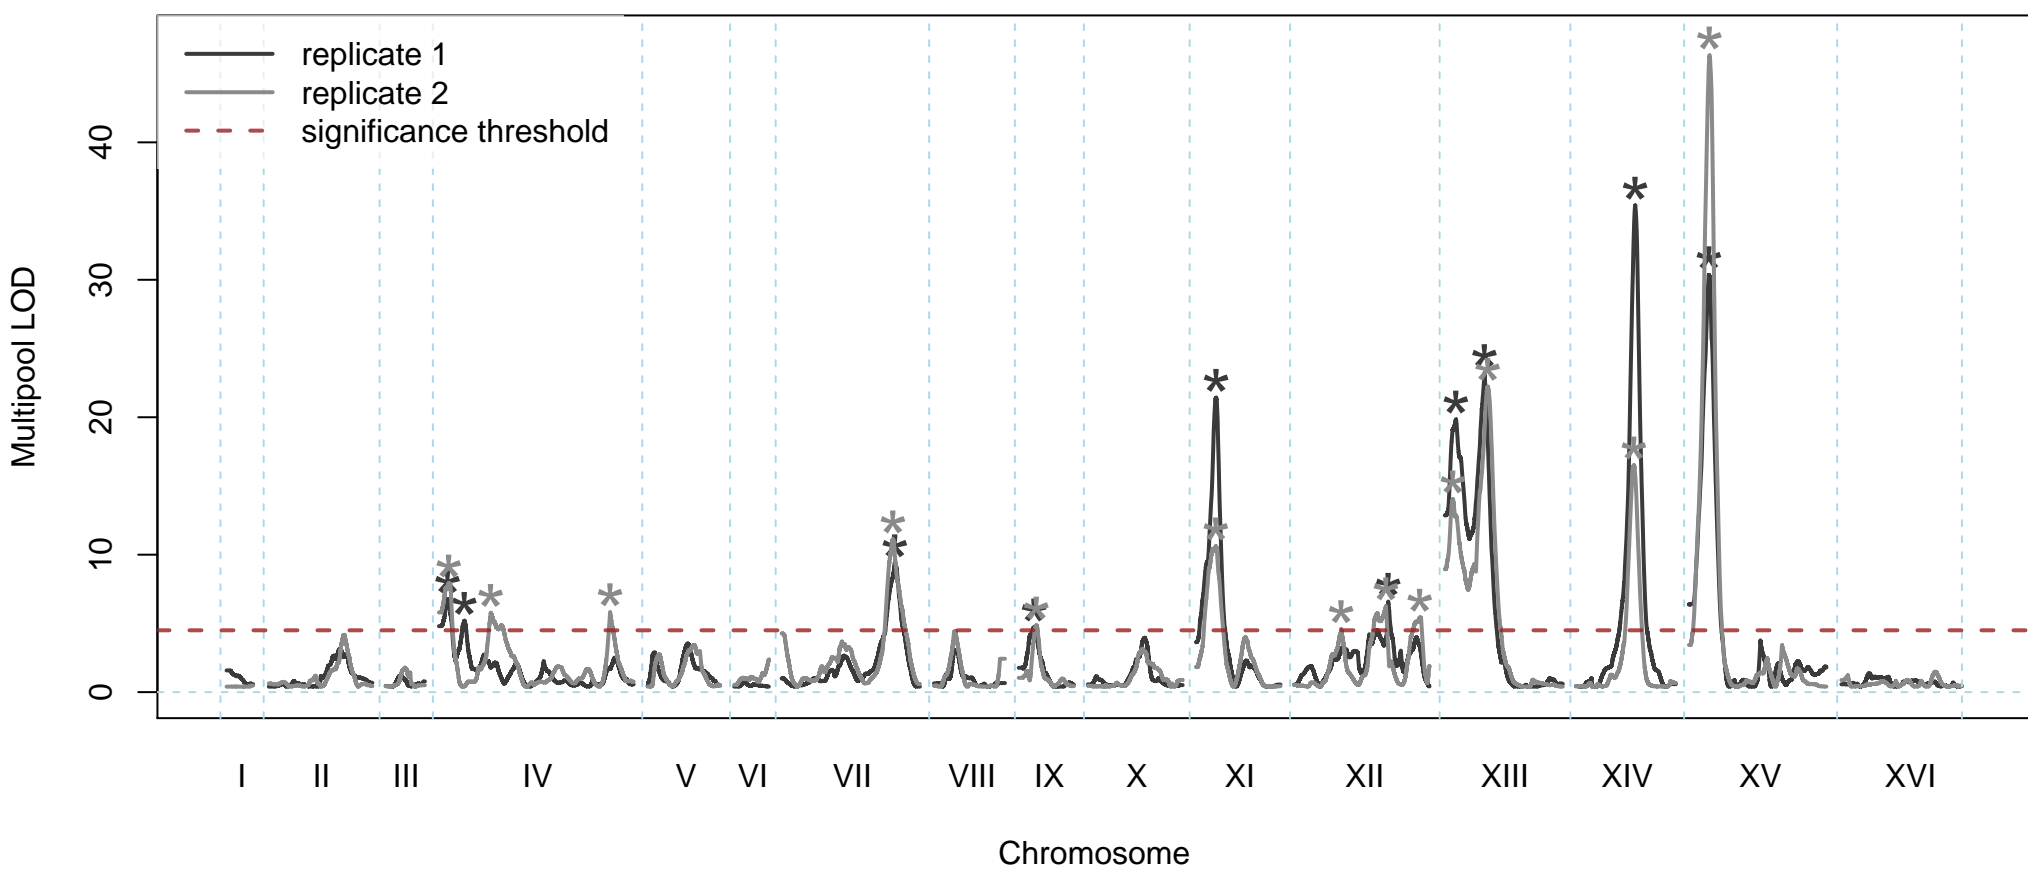

# Ile N-end TFT

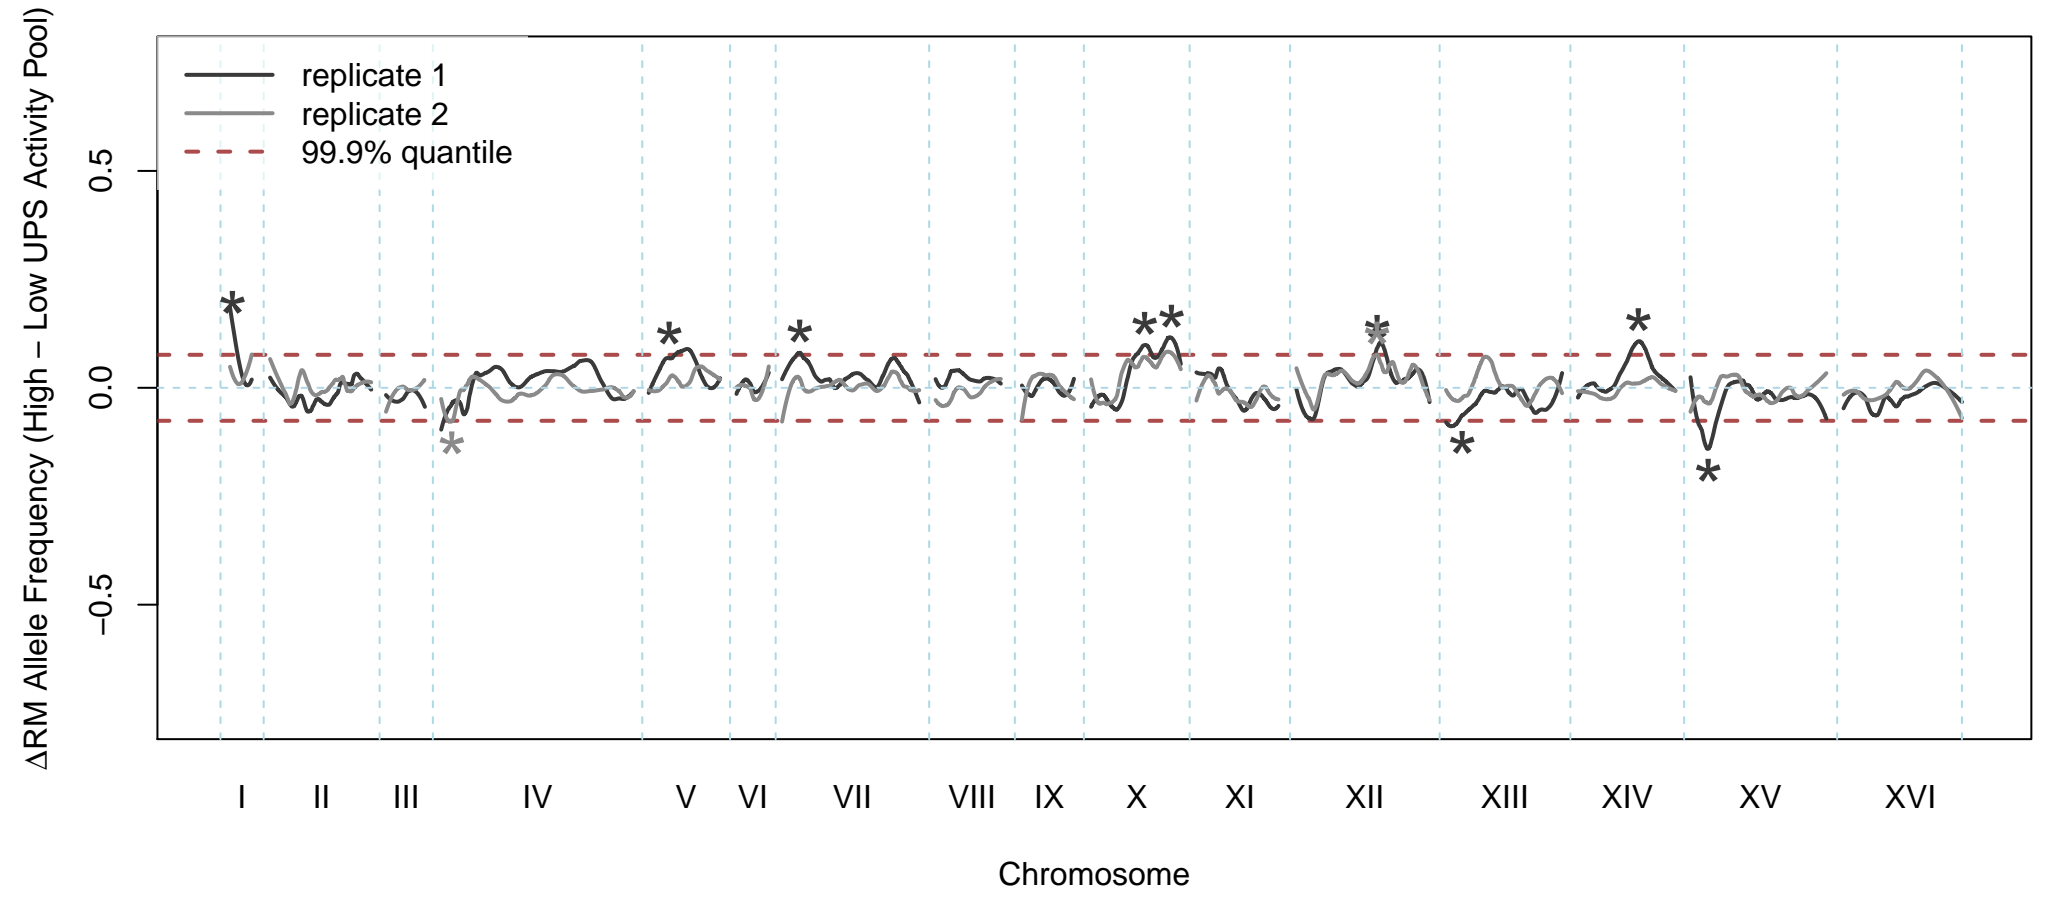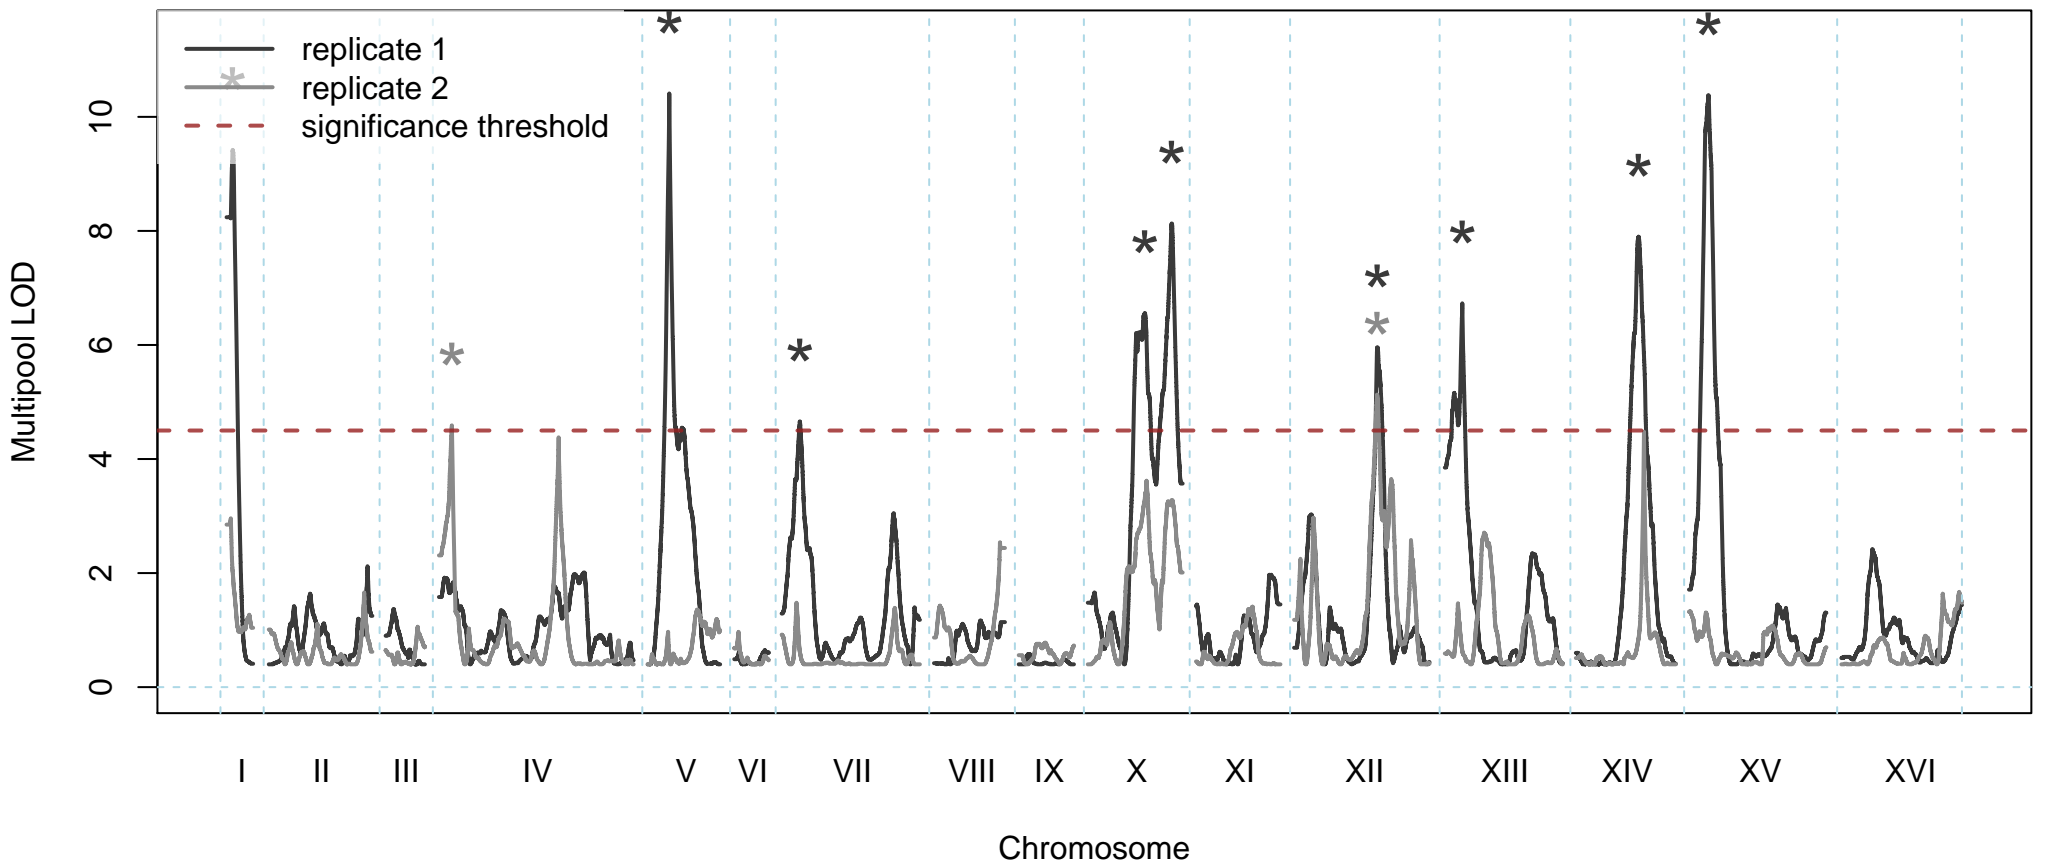

# Leu N-end TFT

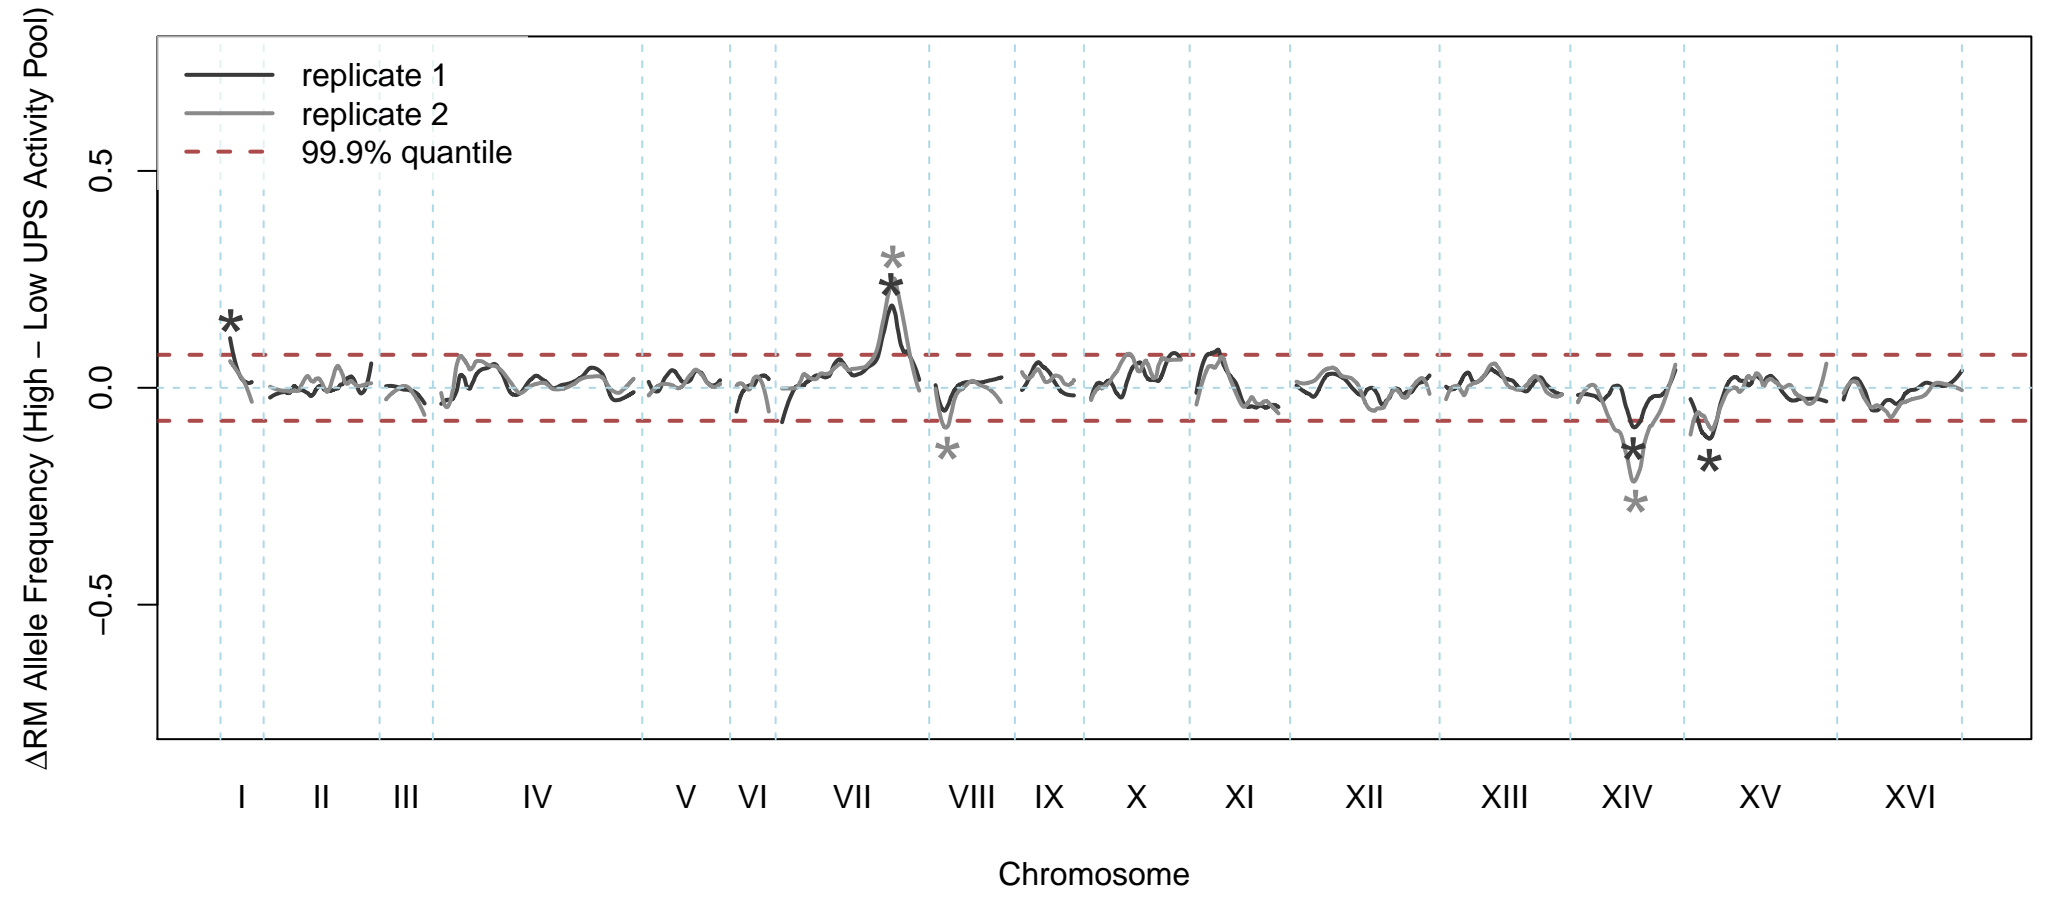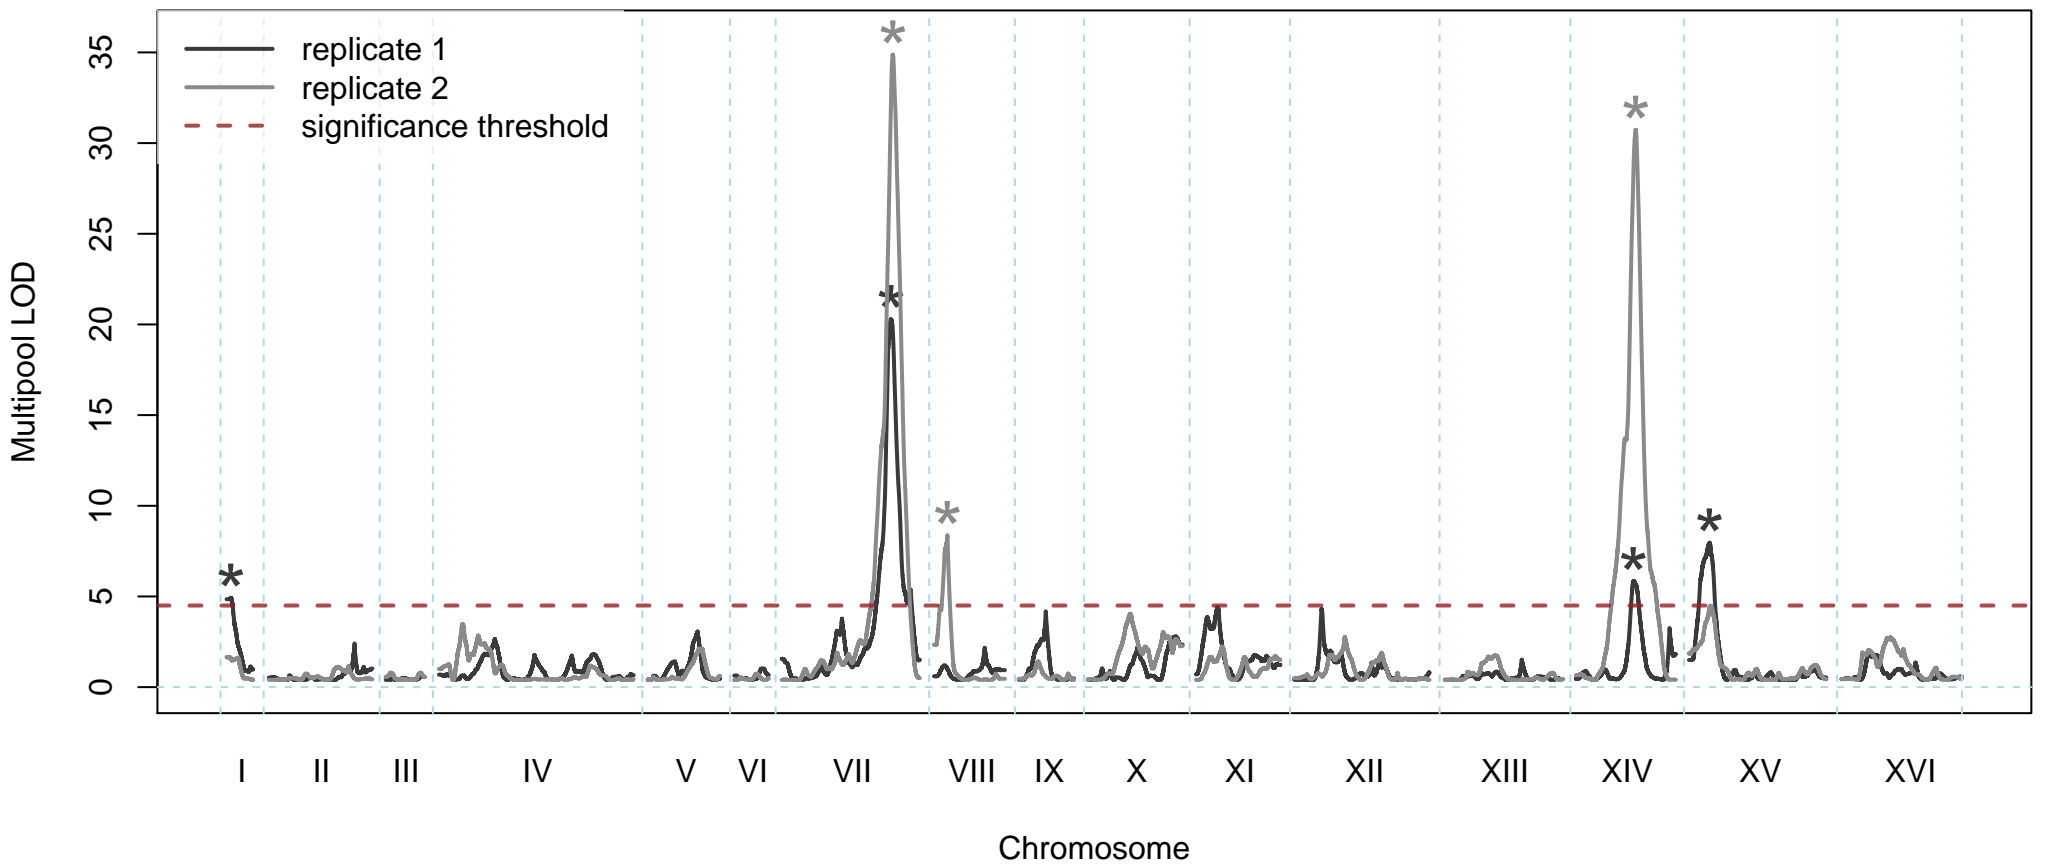

# Lys N-end TFT

$\Delta$ RM Allele Frequency (High - Low UPS Activity Pool)

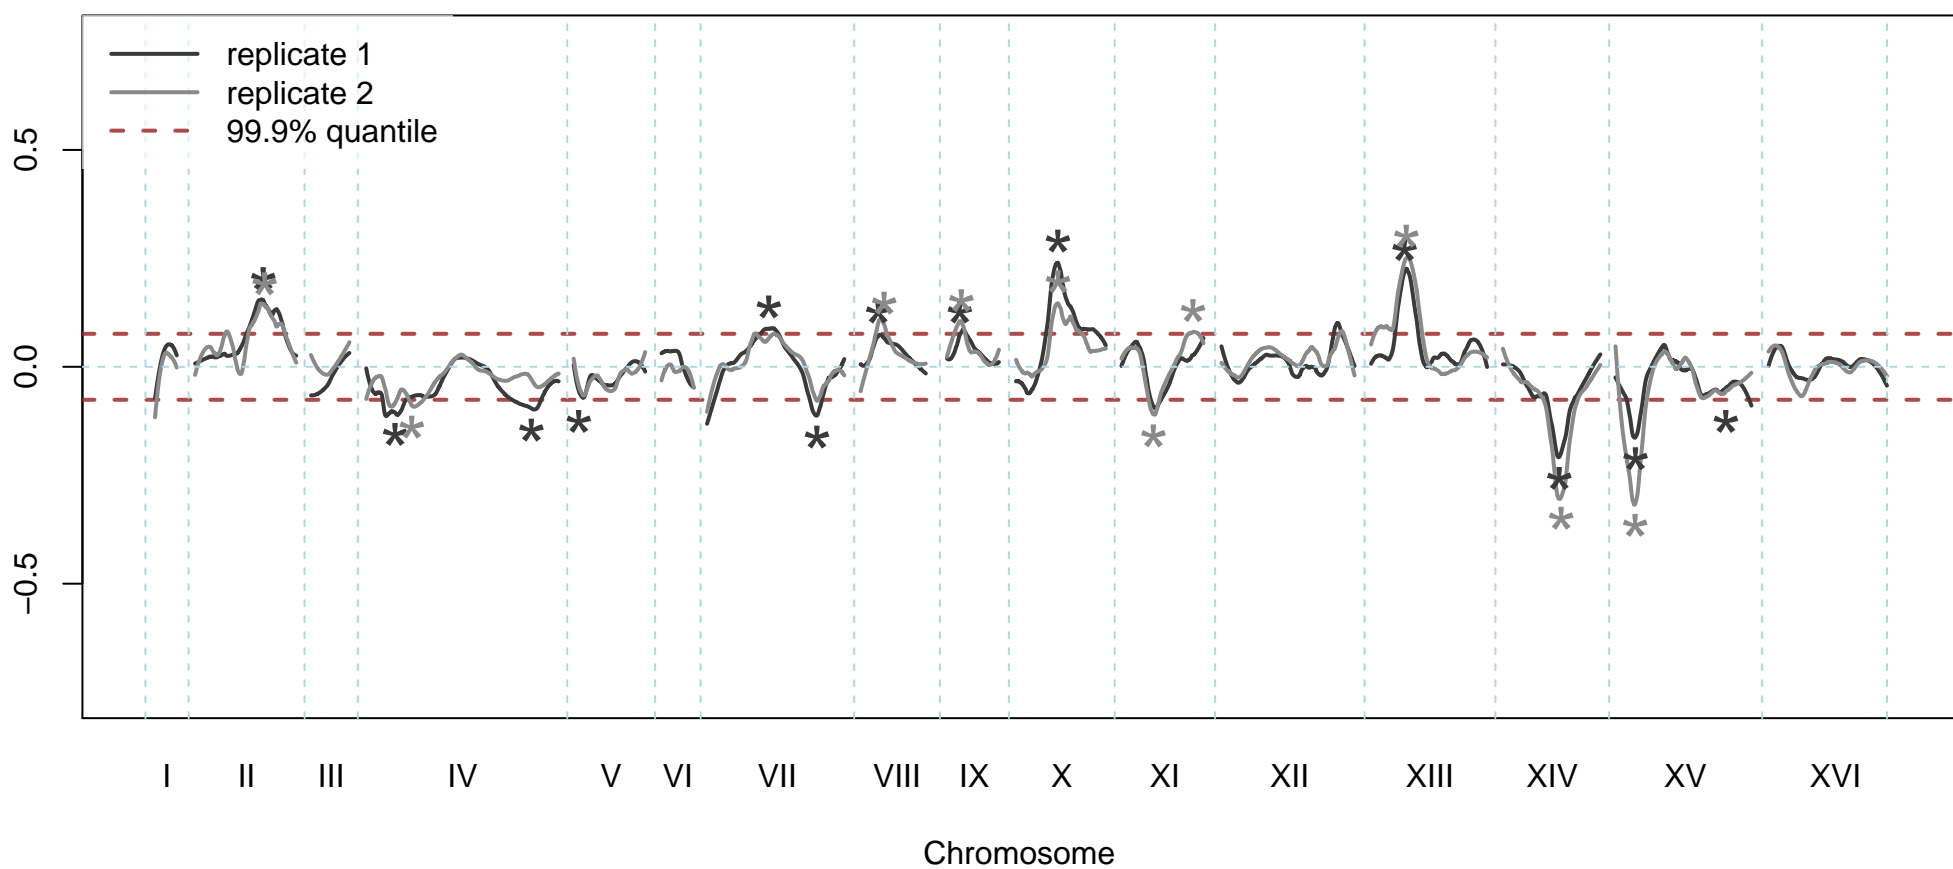

replicate 1  
replicate 2  
significance threshold

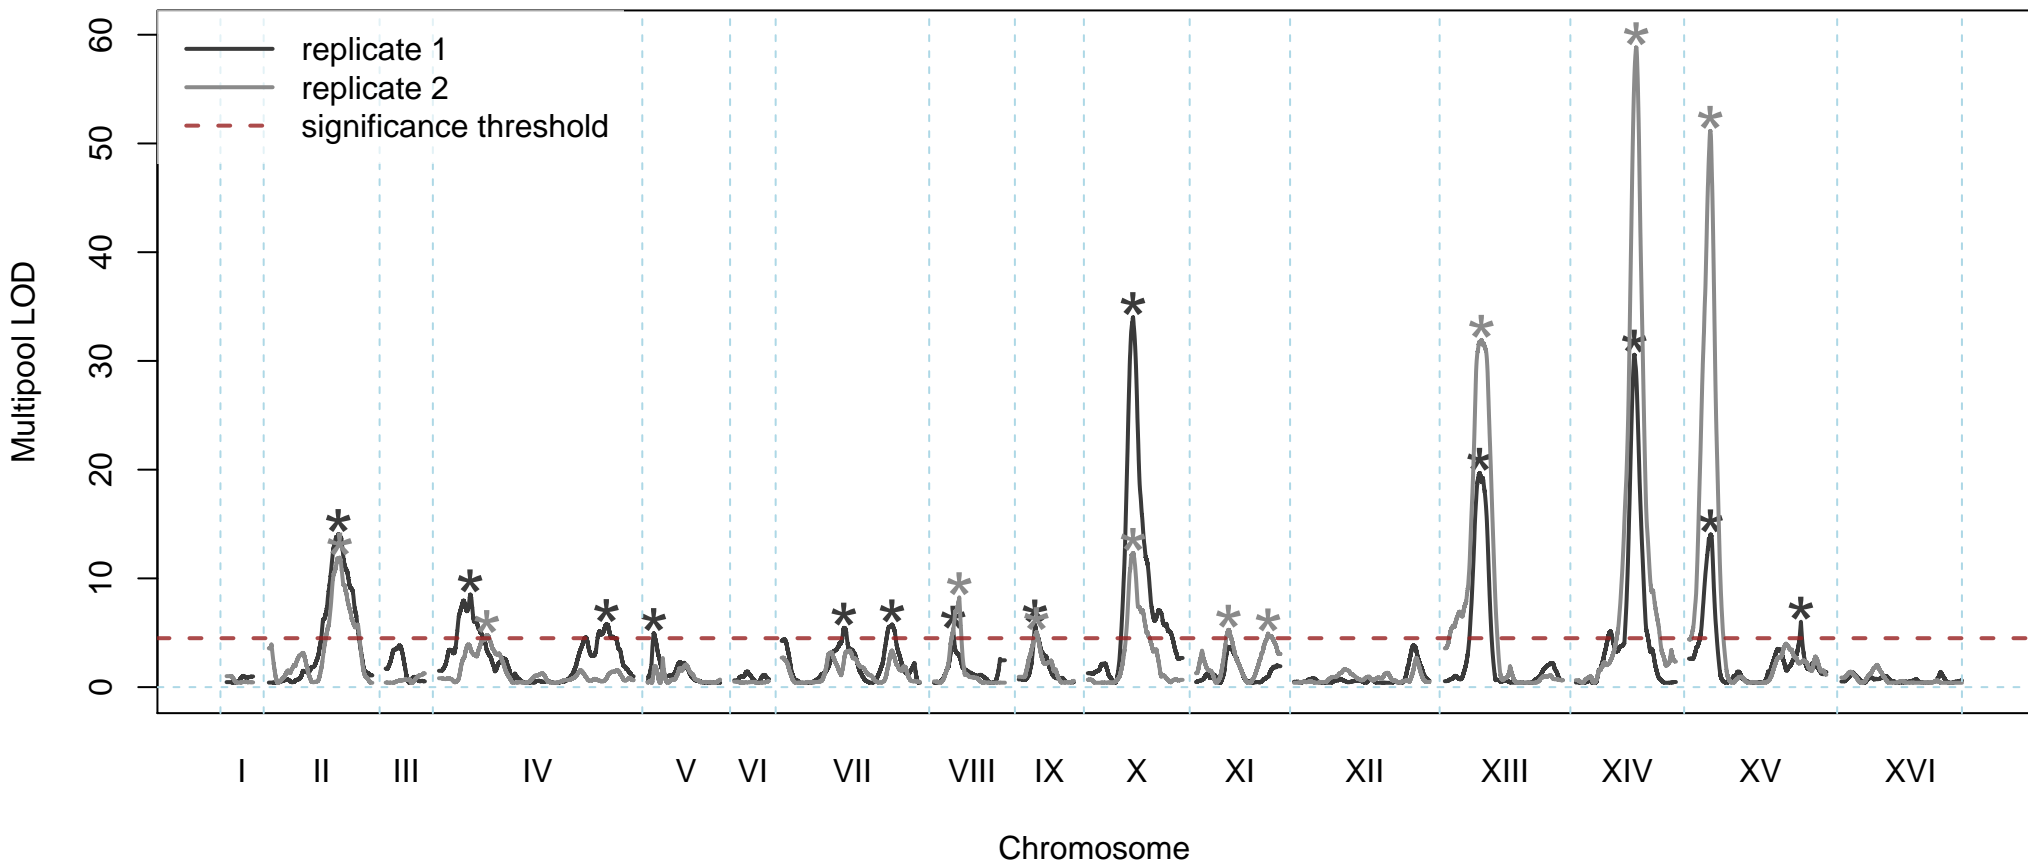

### Met N-end TFT

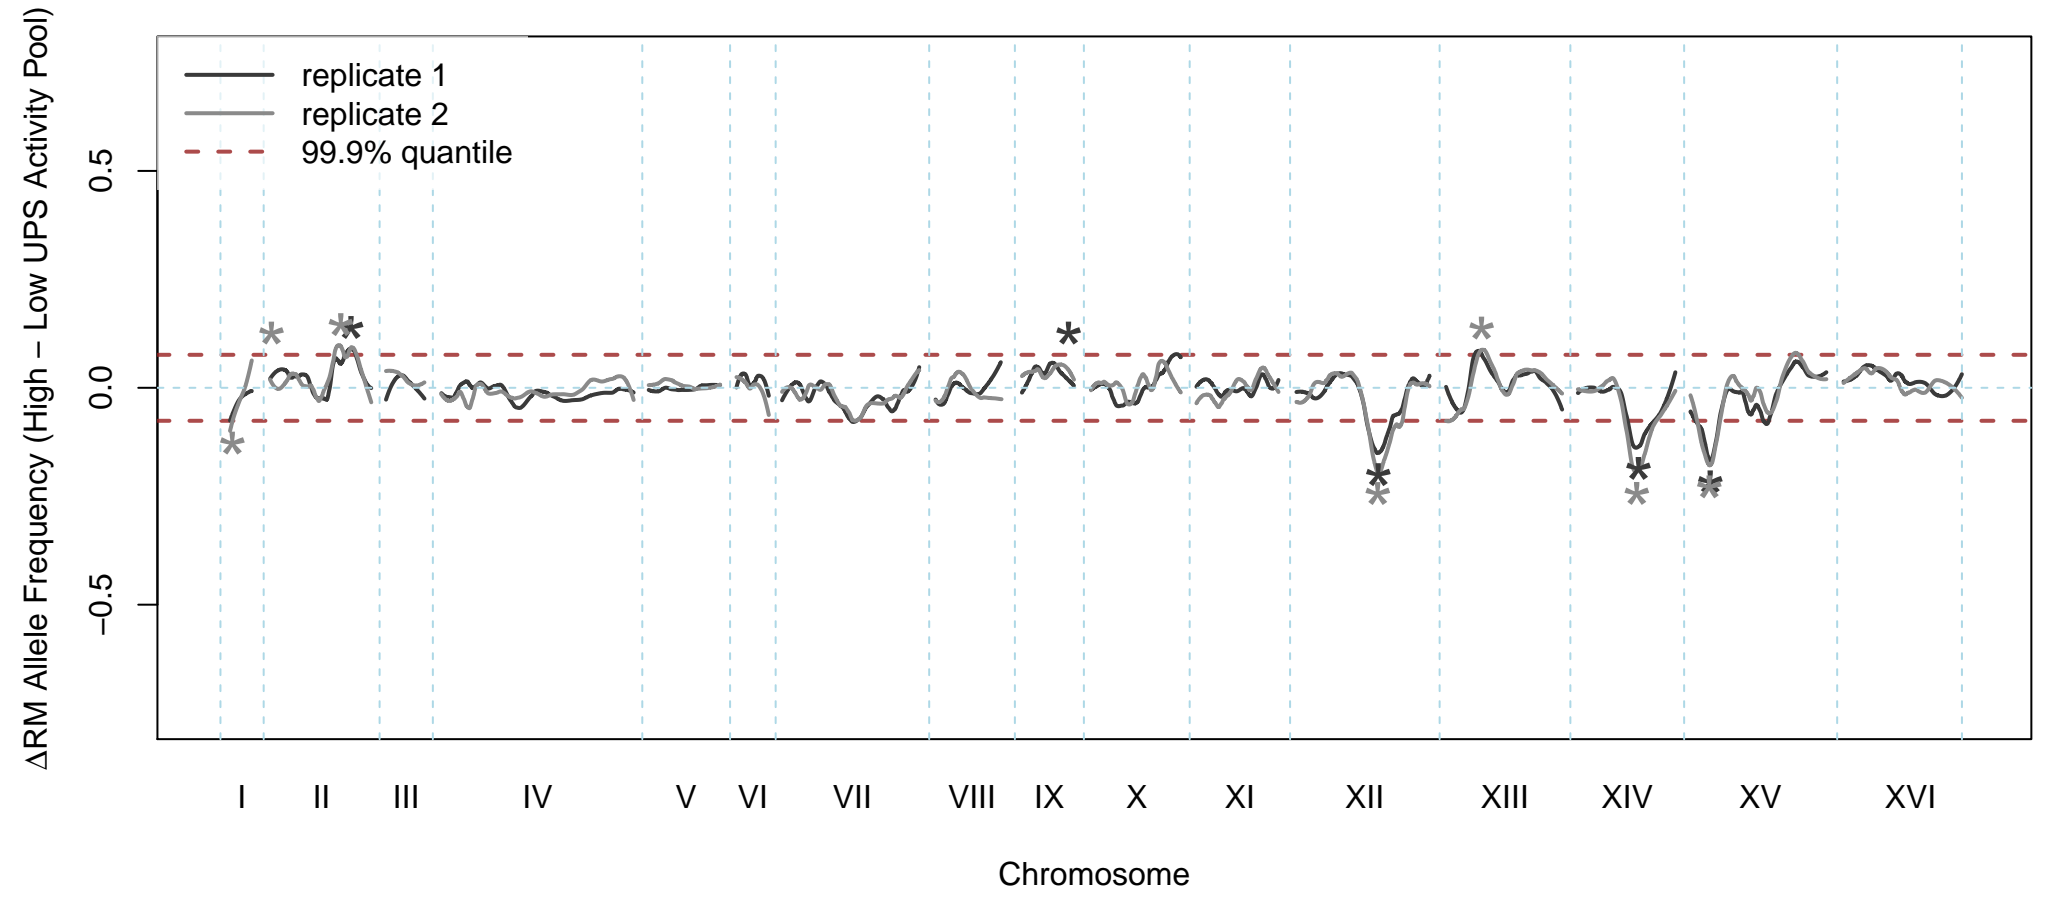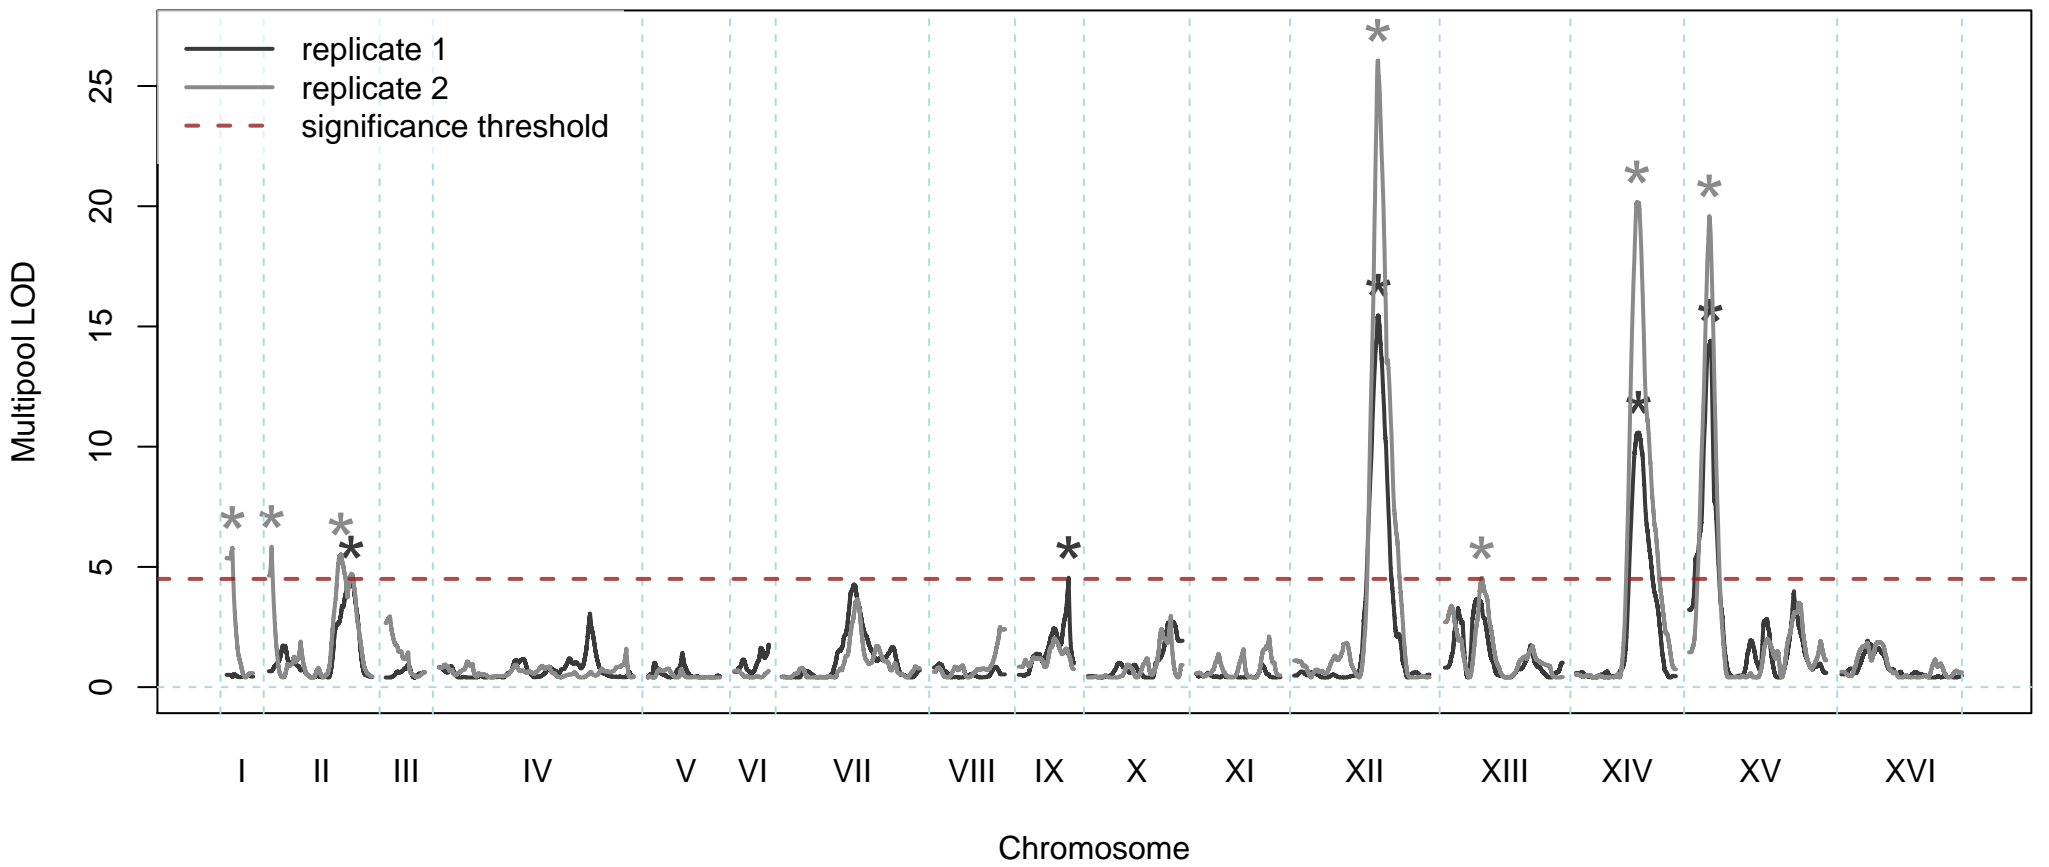

# Phe N-end TFT

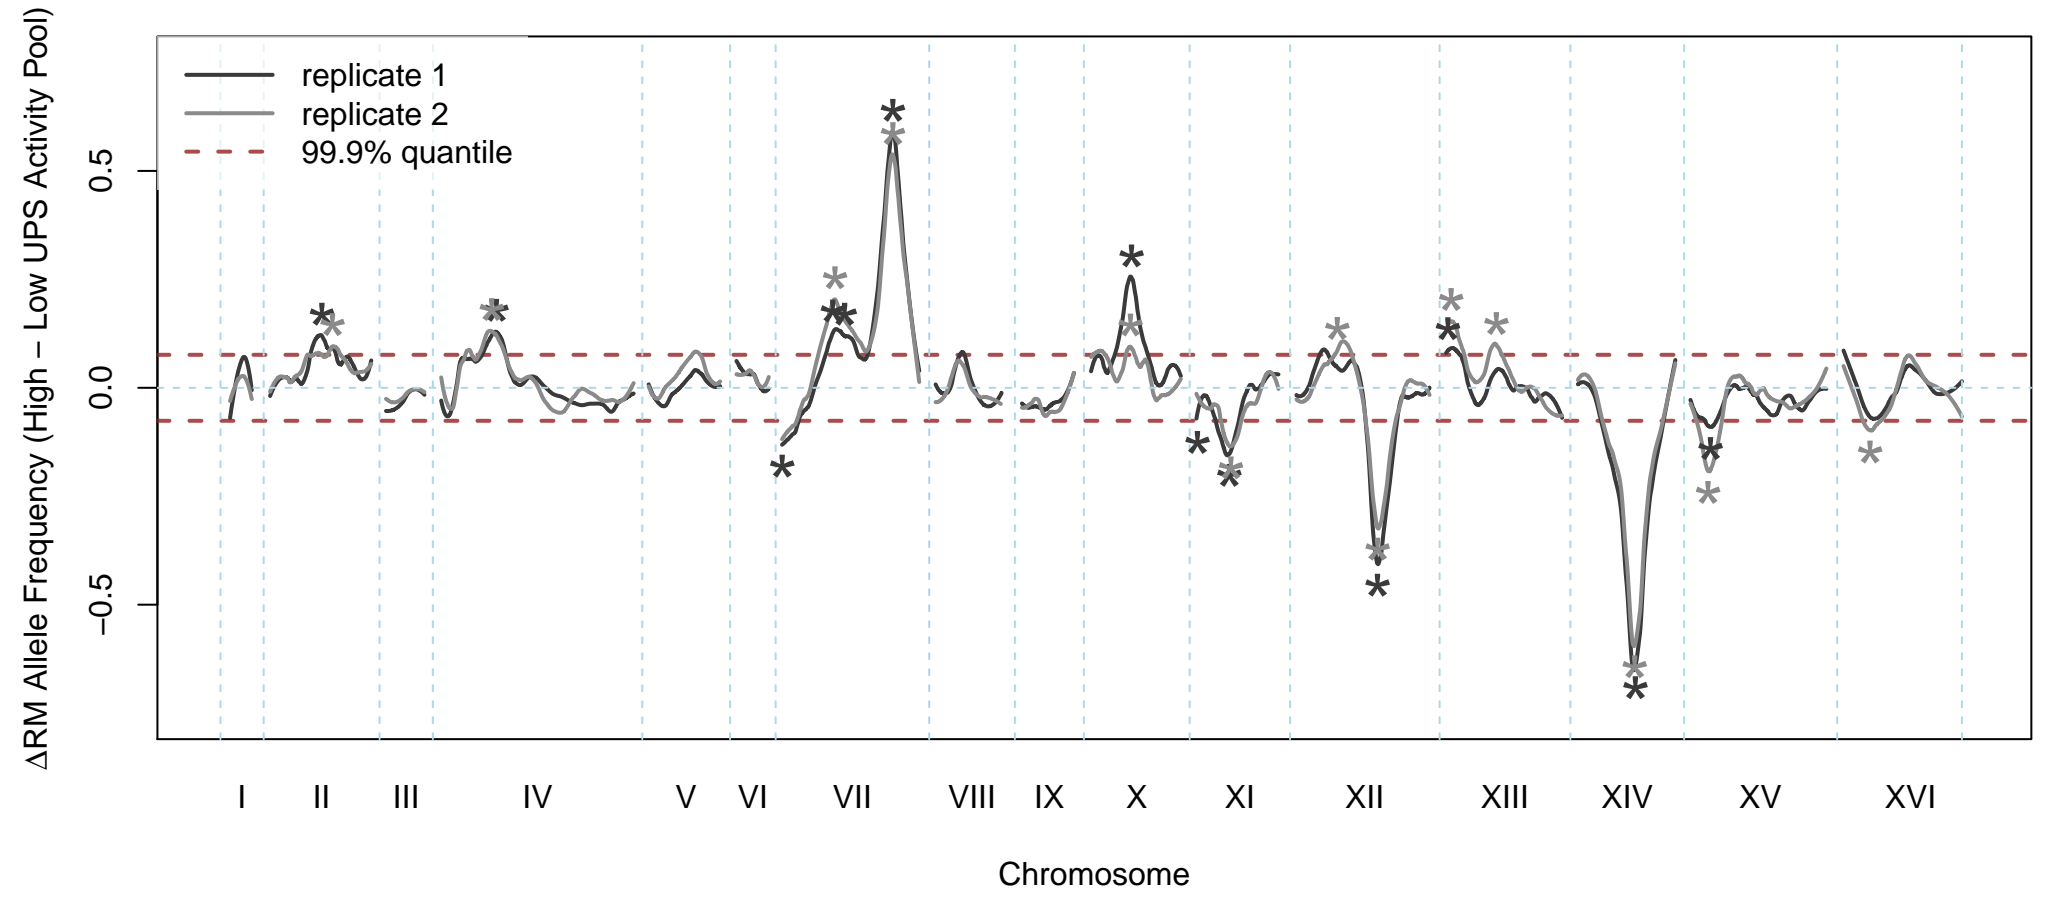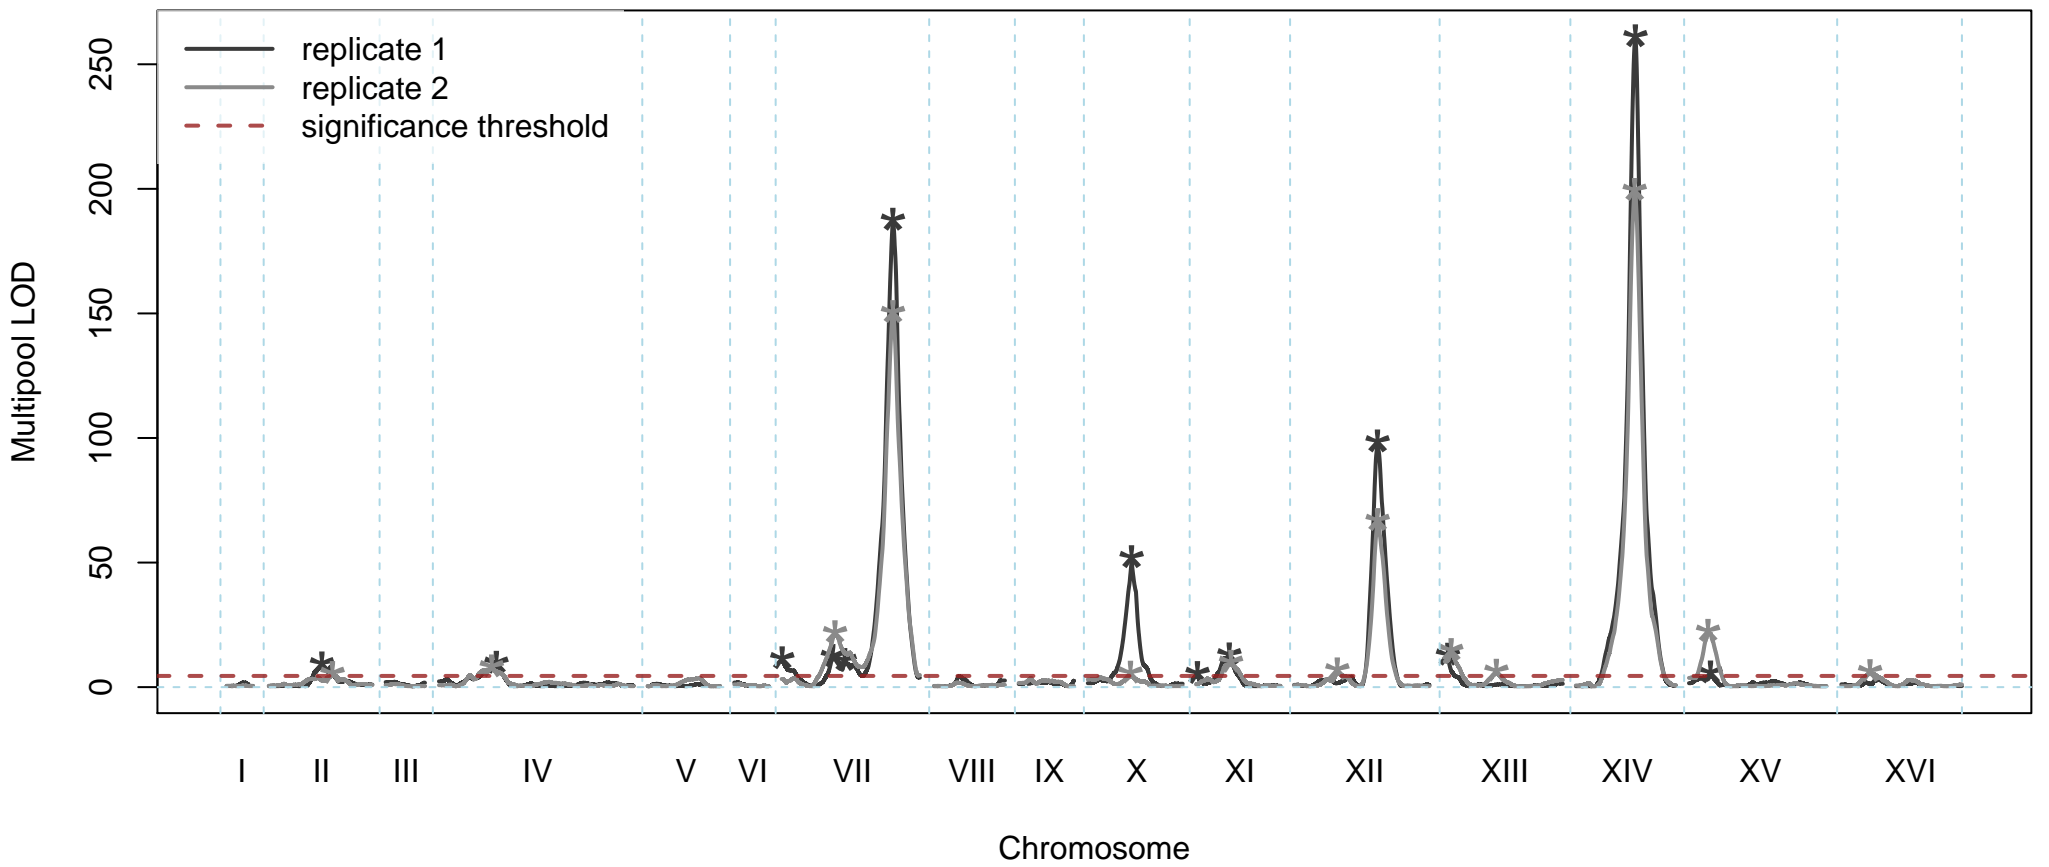

# Pro N-end TFT

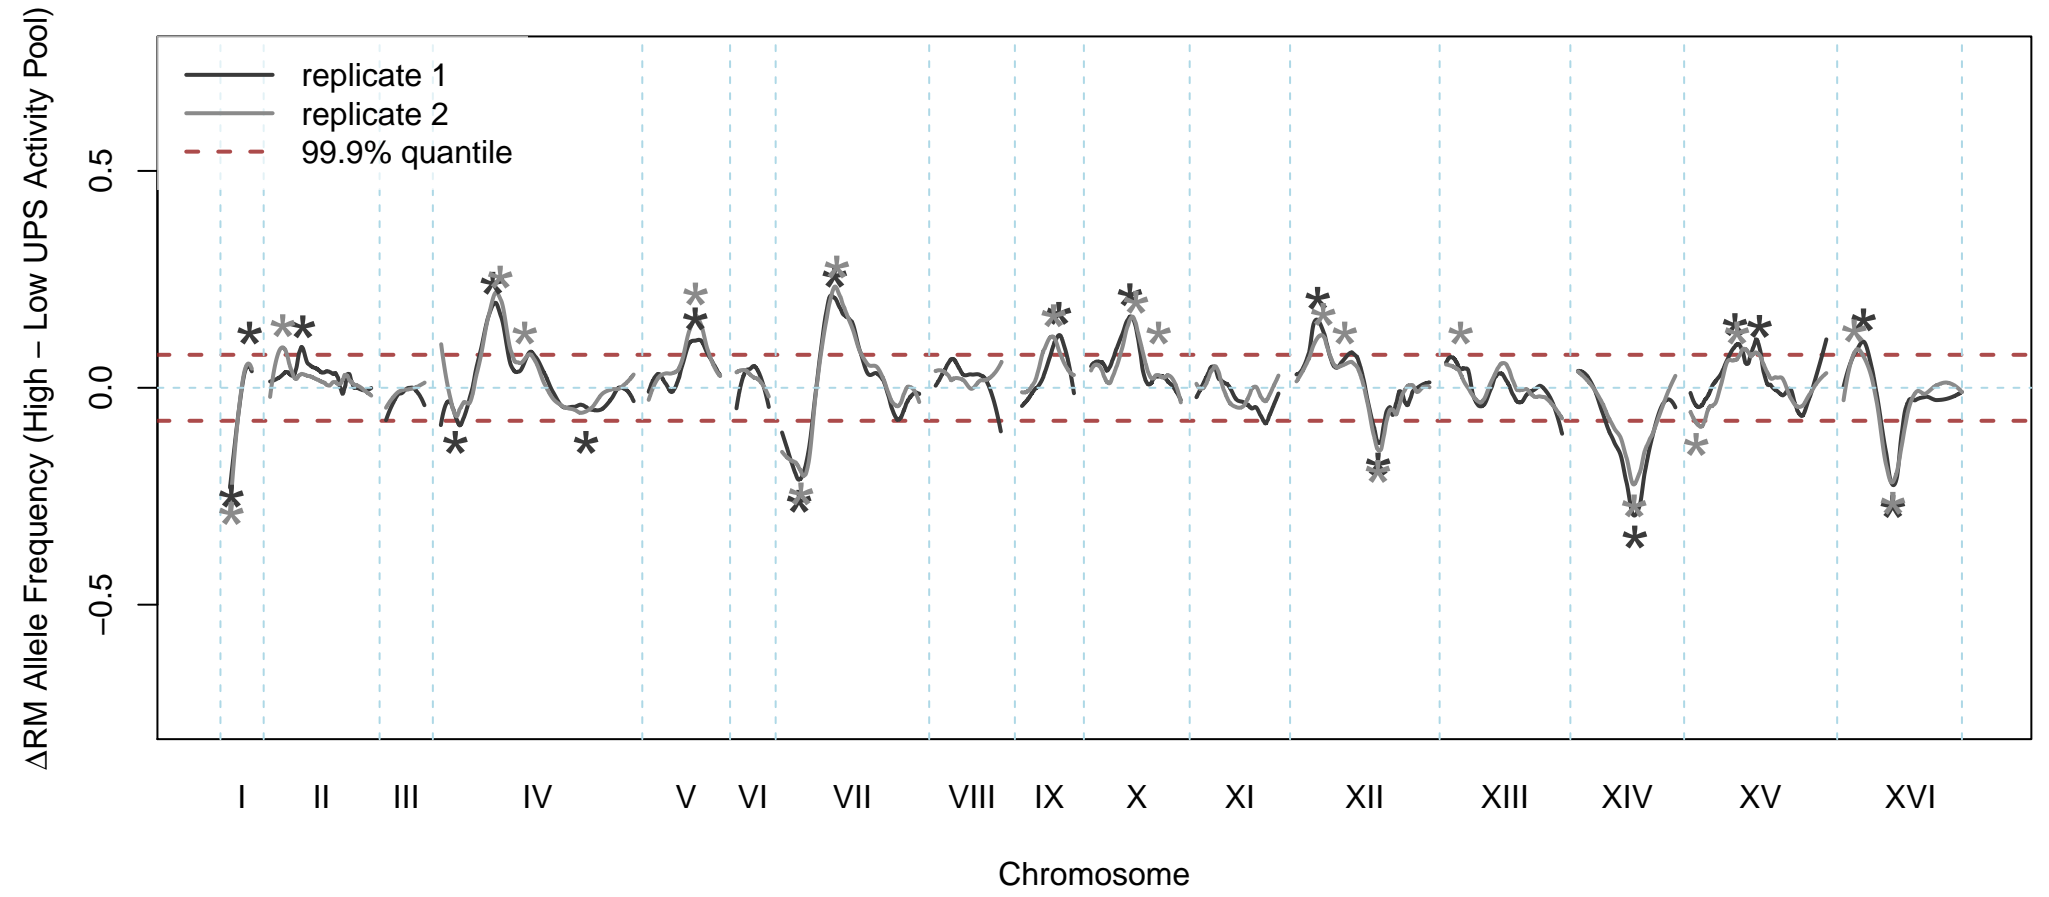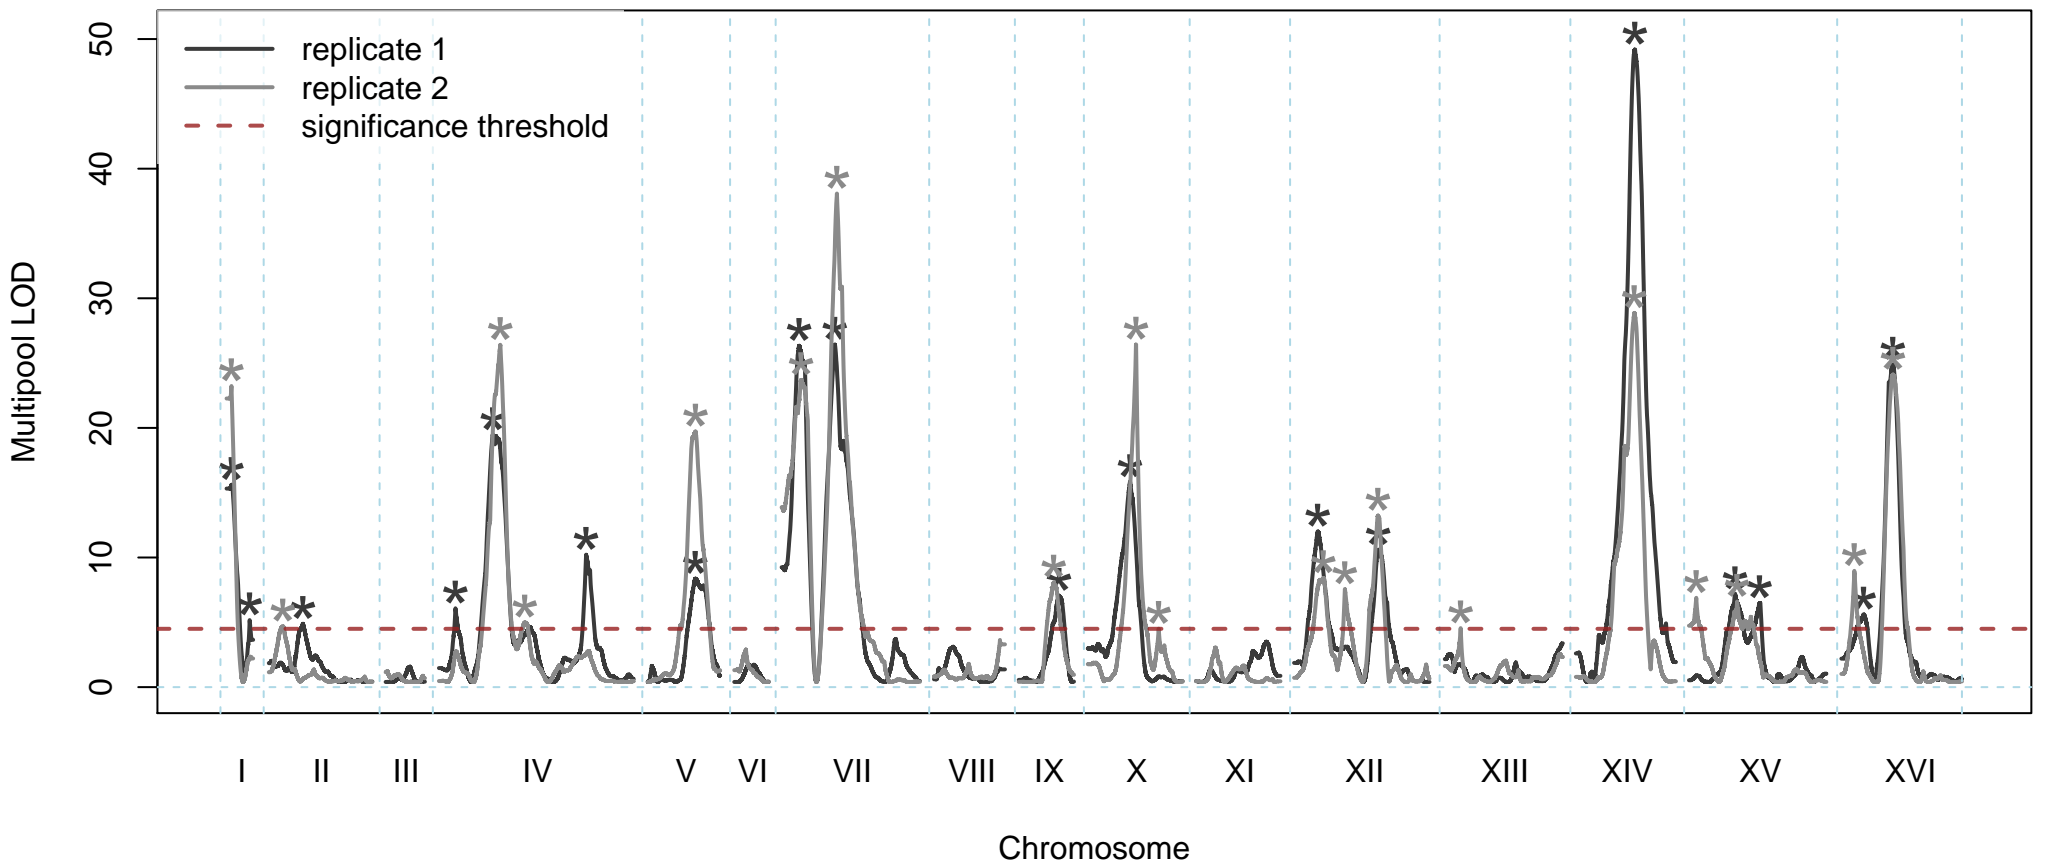

### Ser N-end TFT

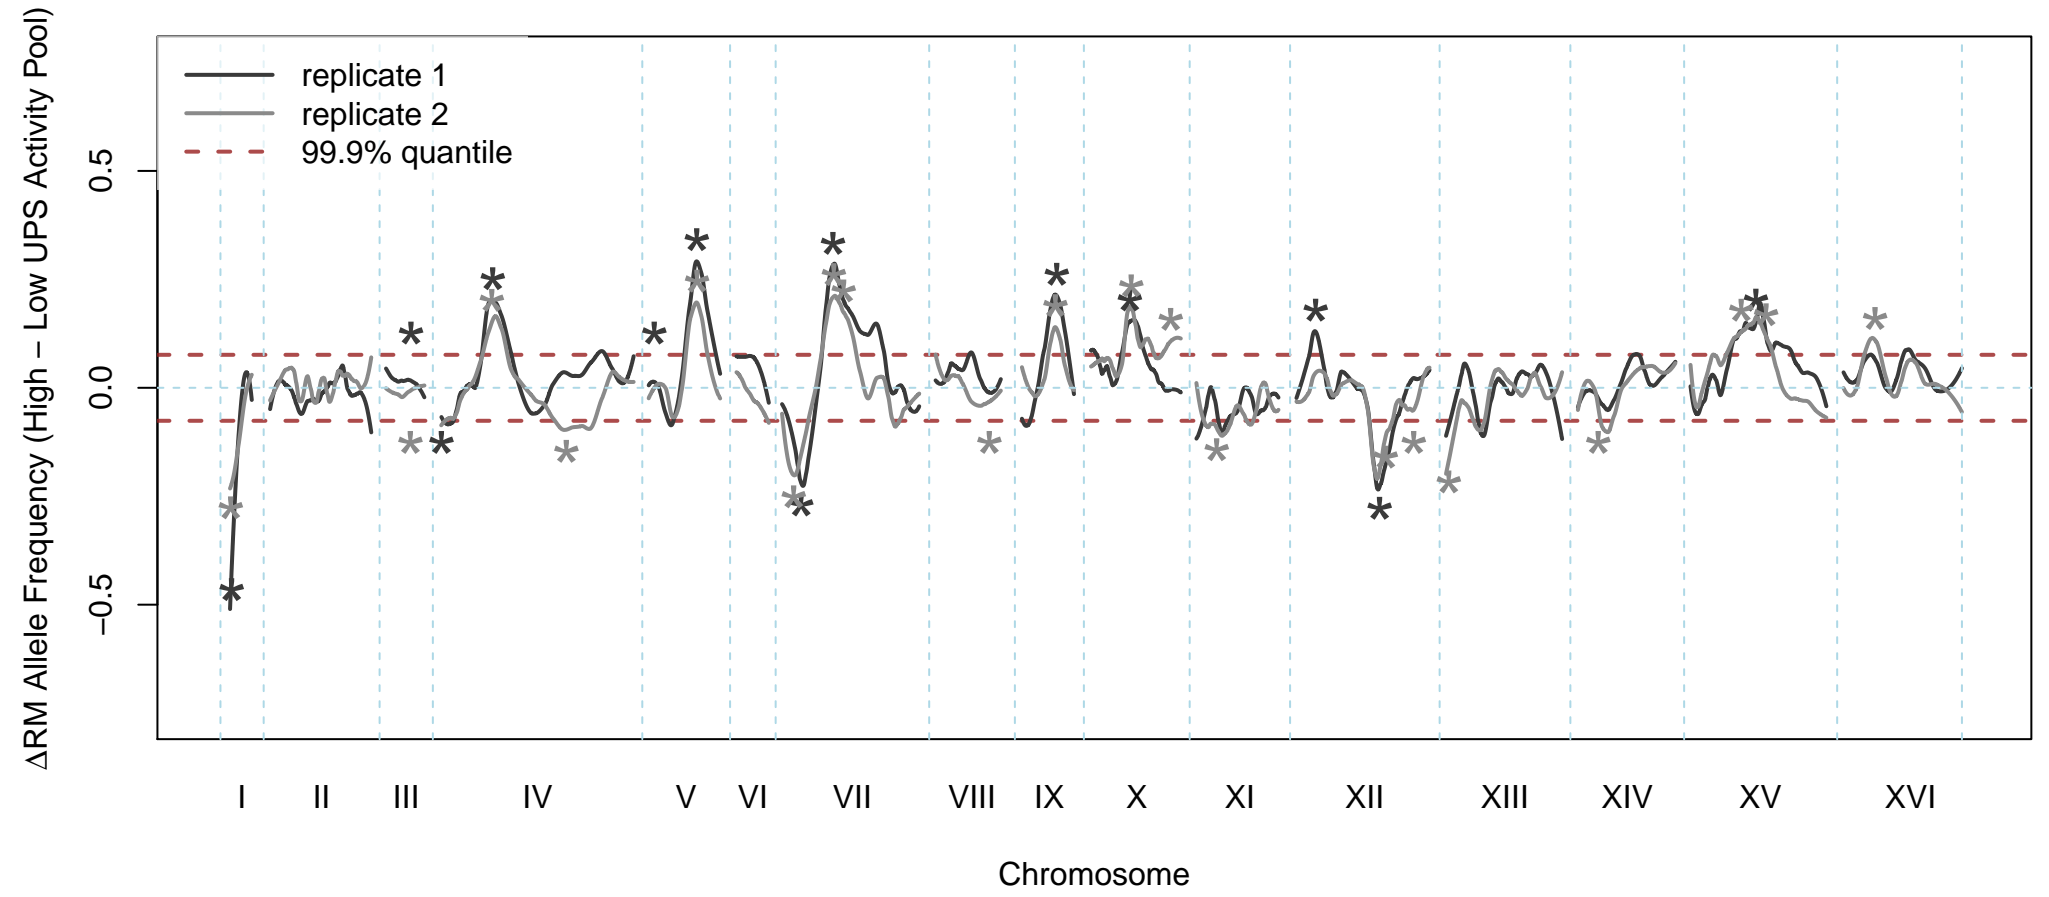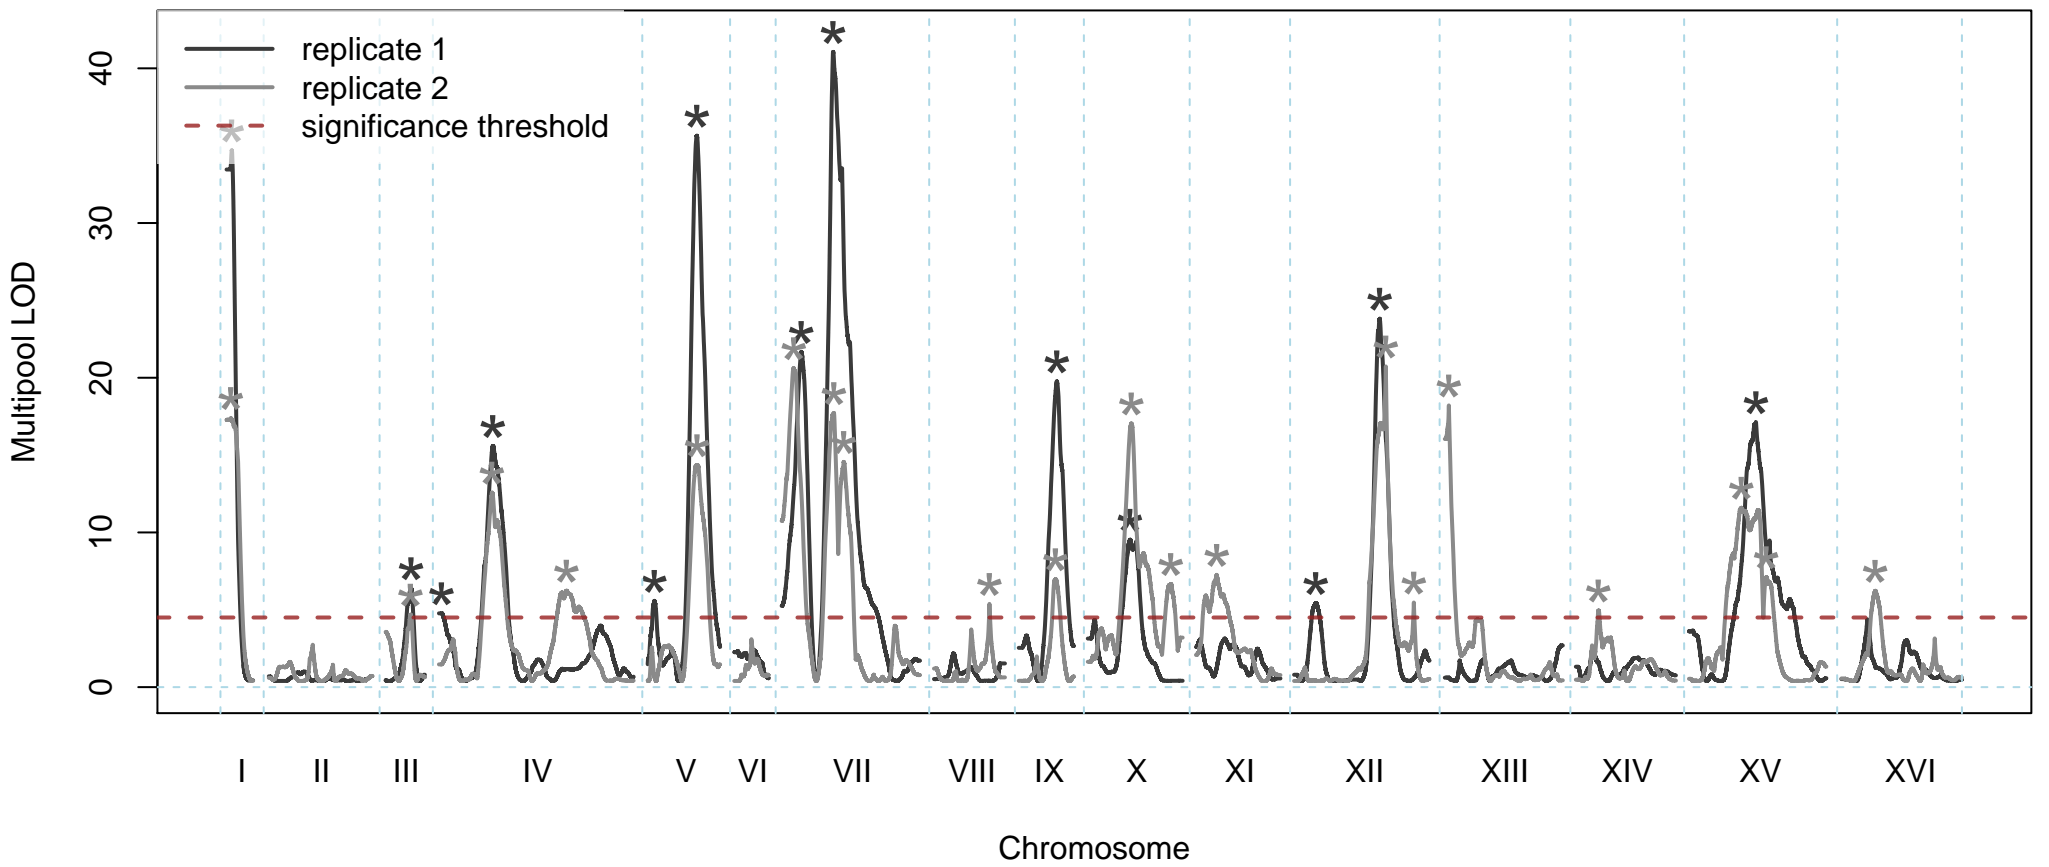



### Thr N-end TFT

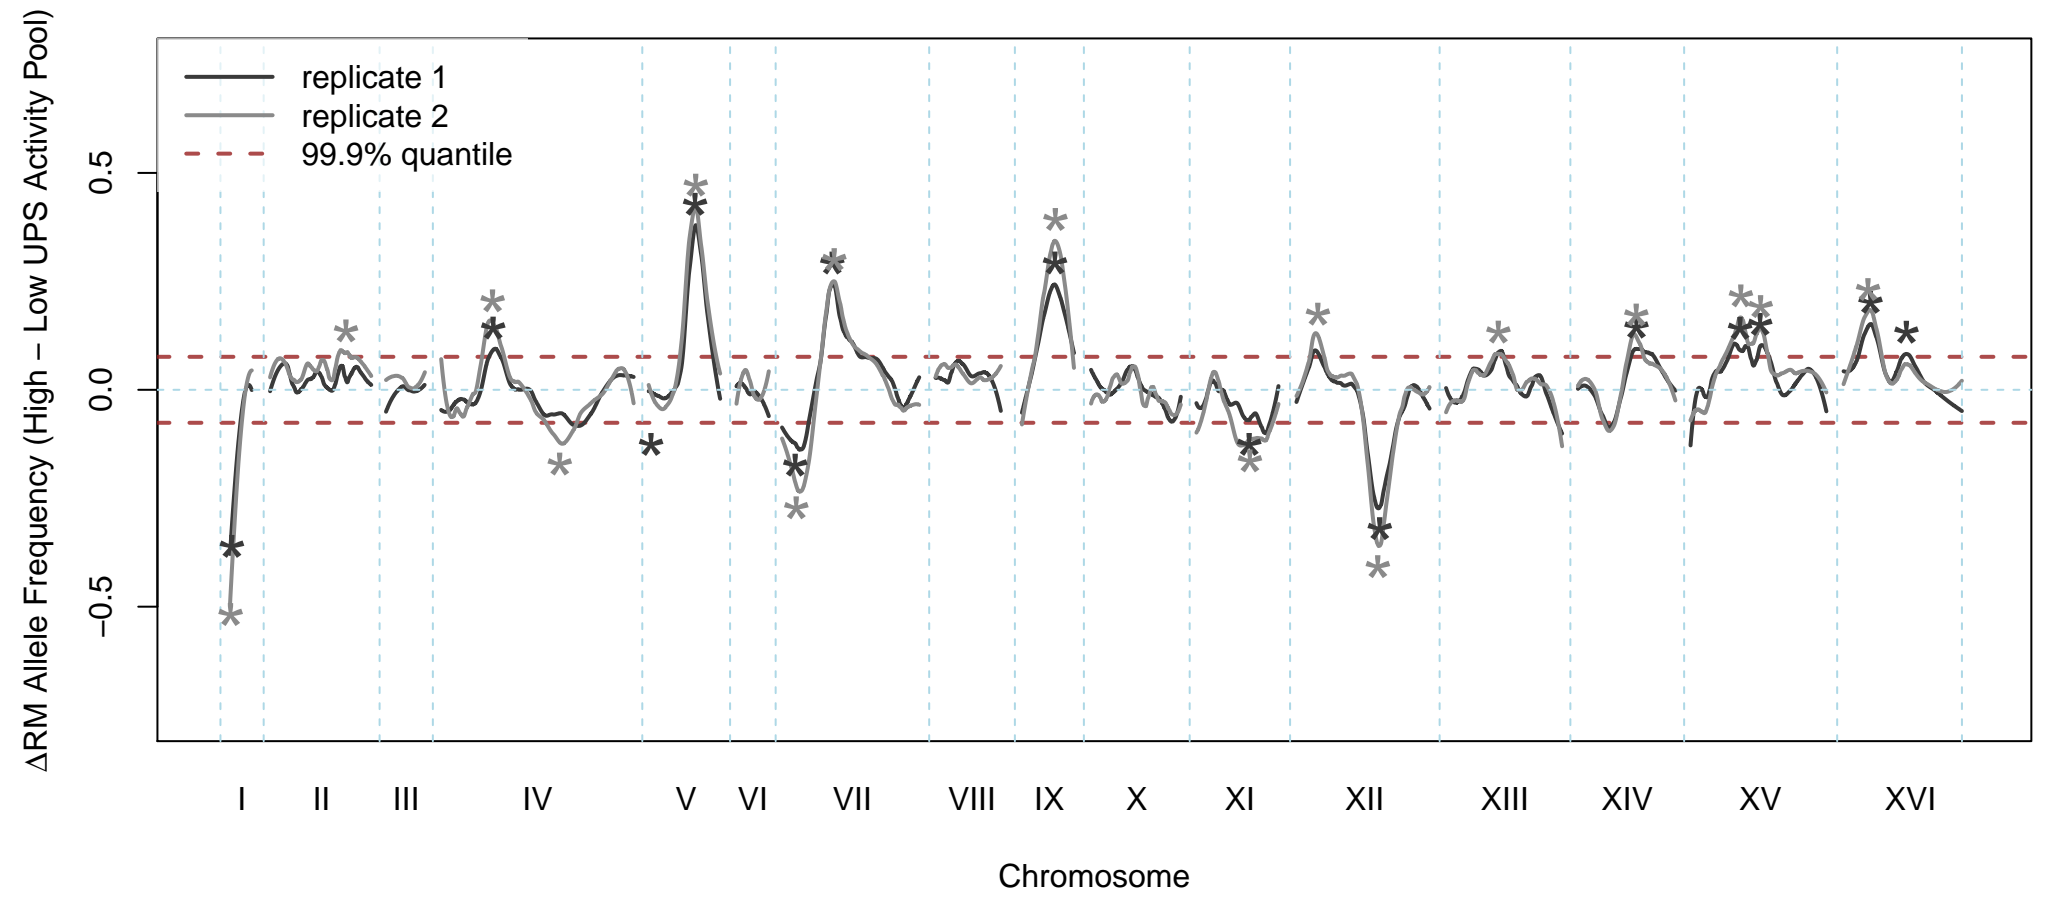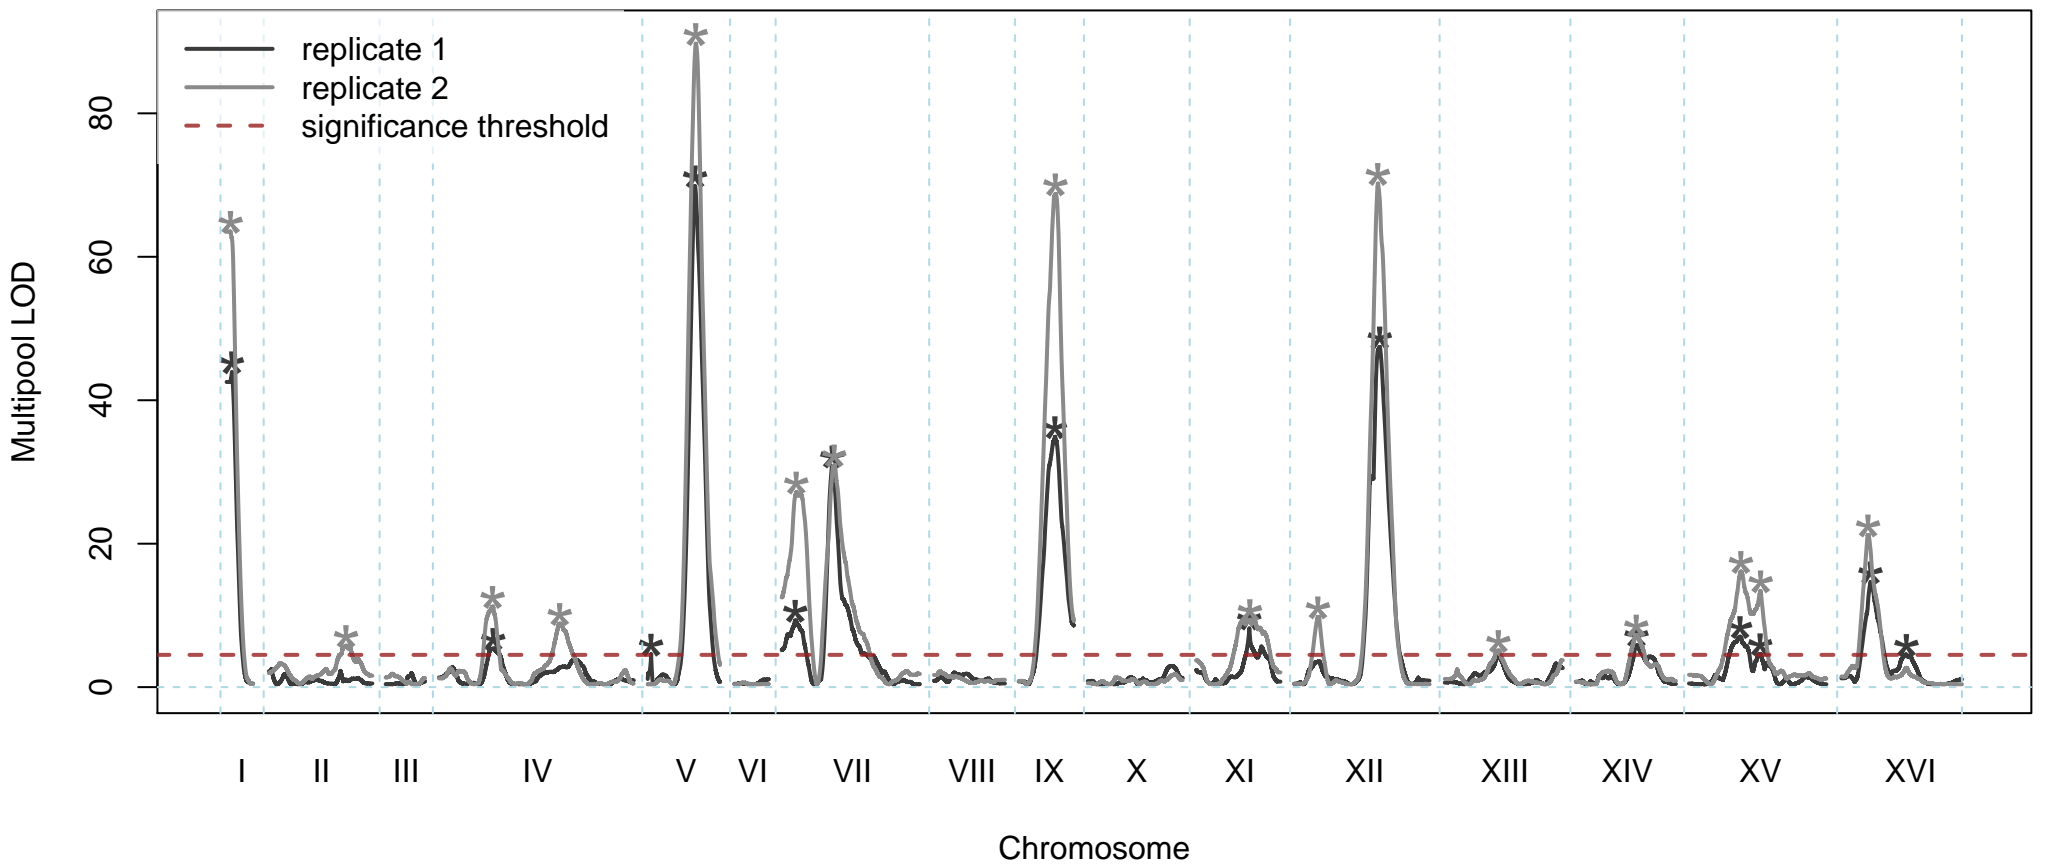

### Trp N-end TFT

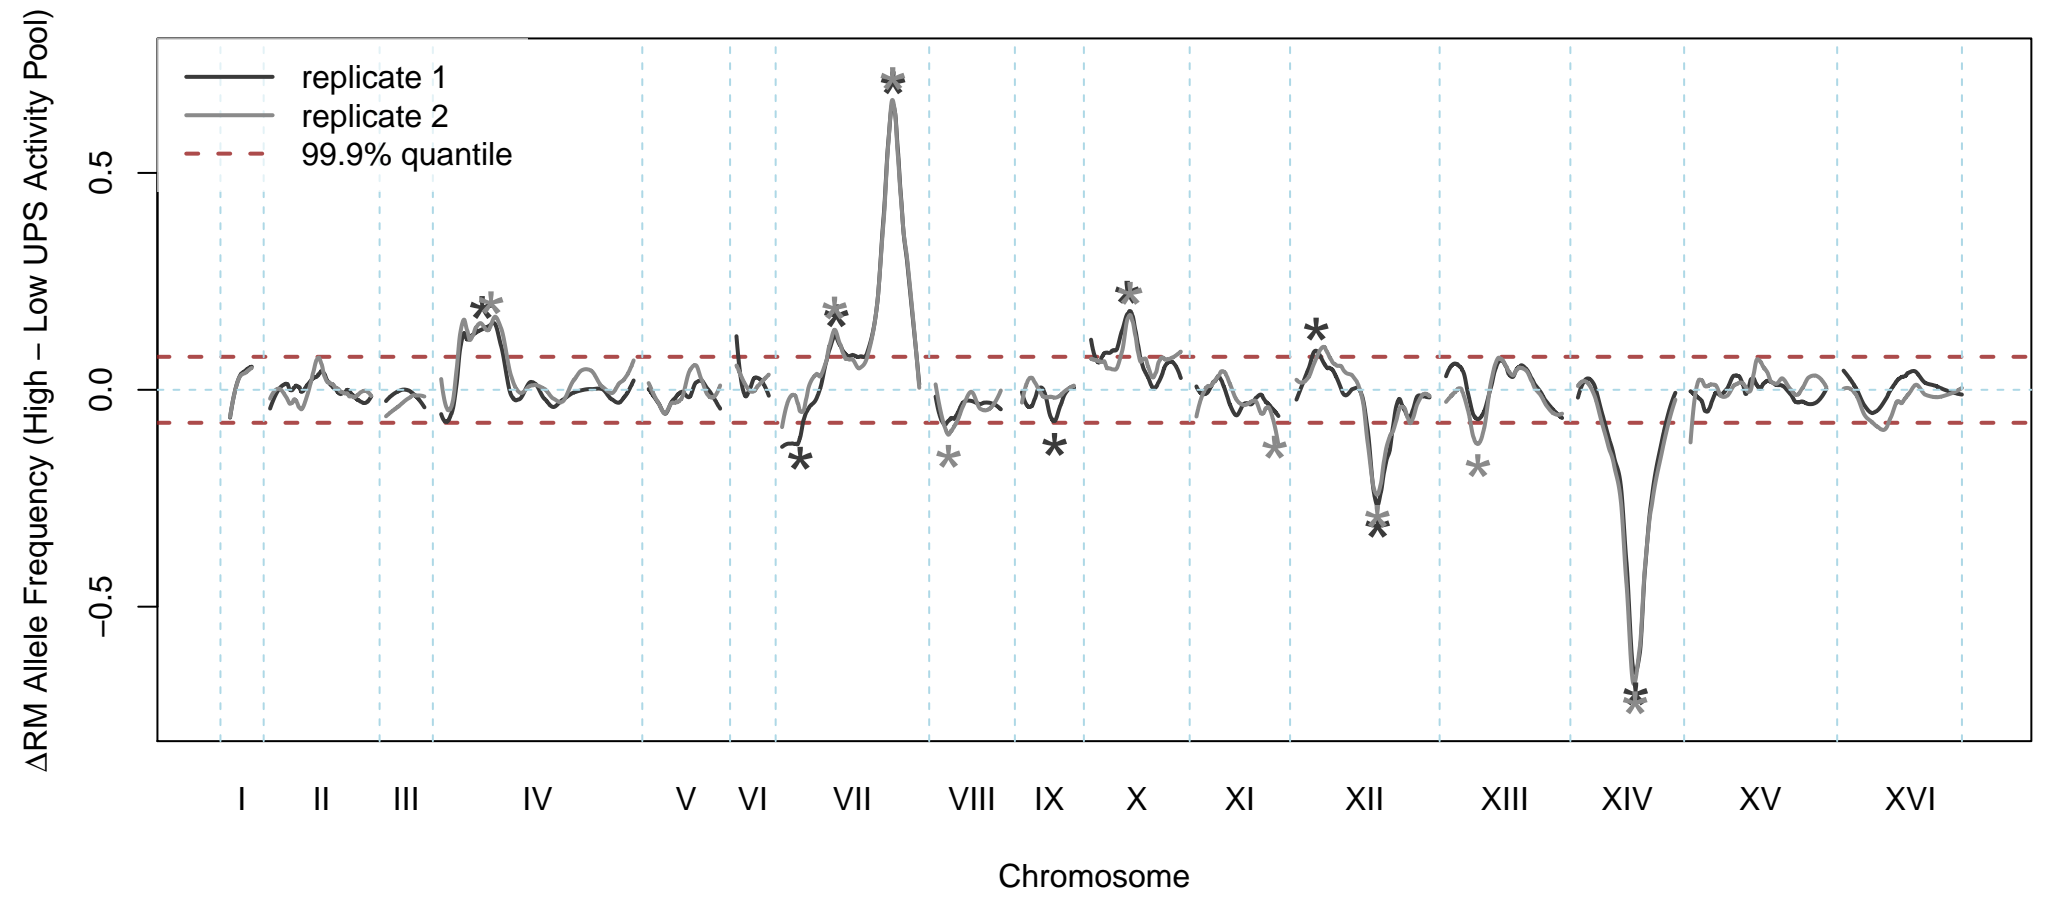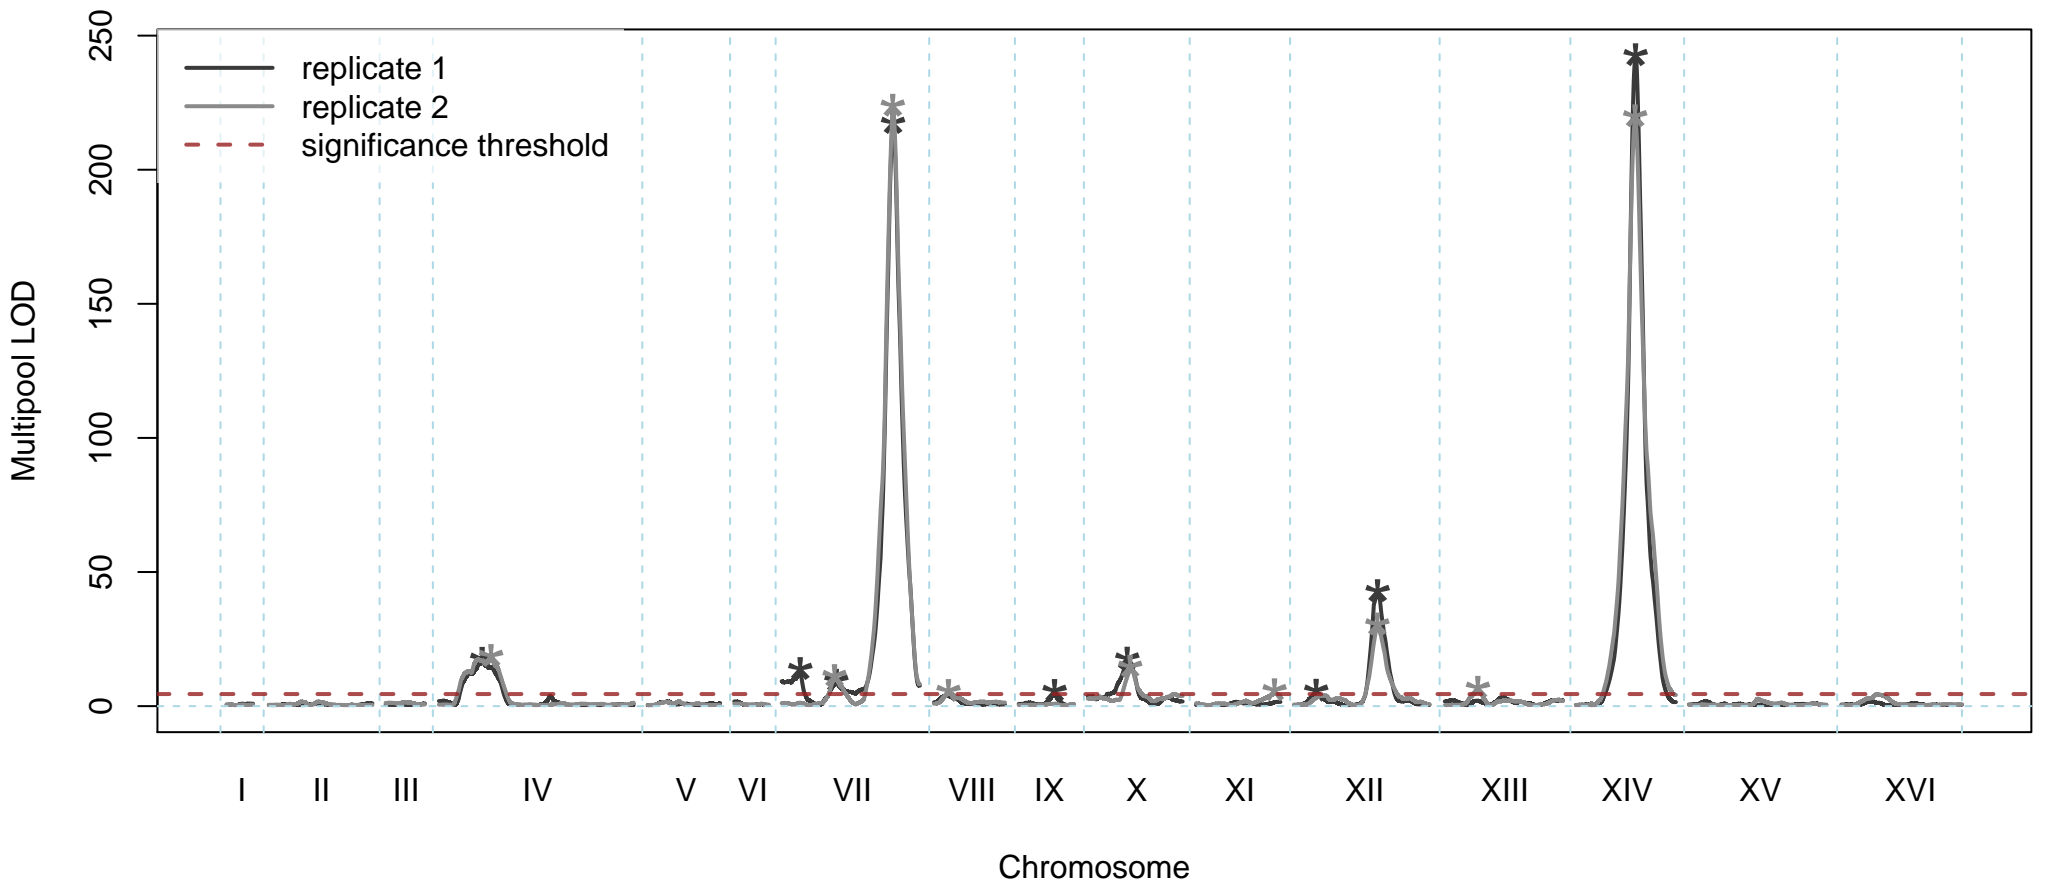

# Tyr N-end TFT

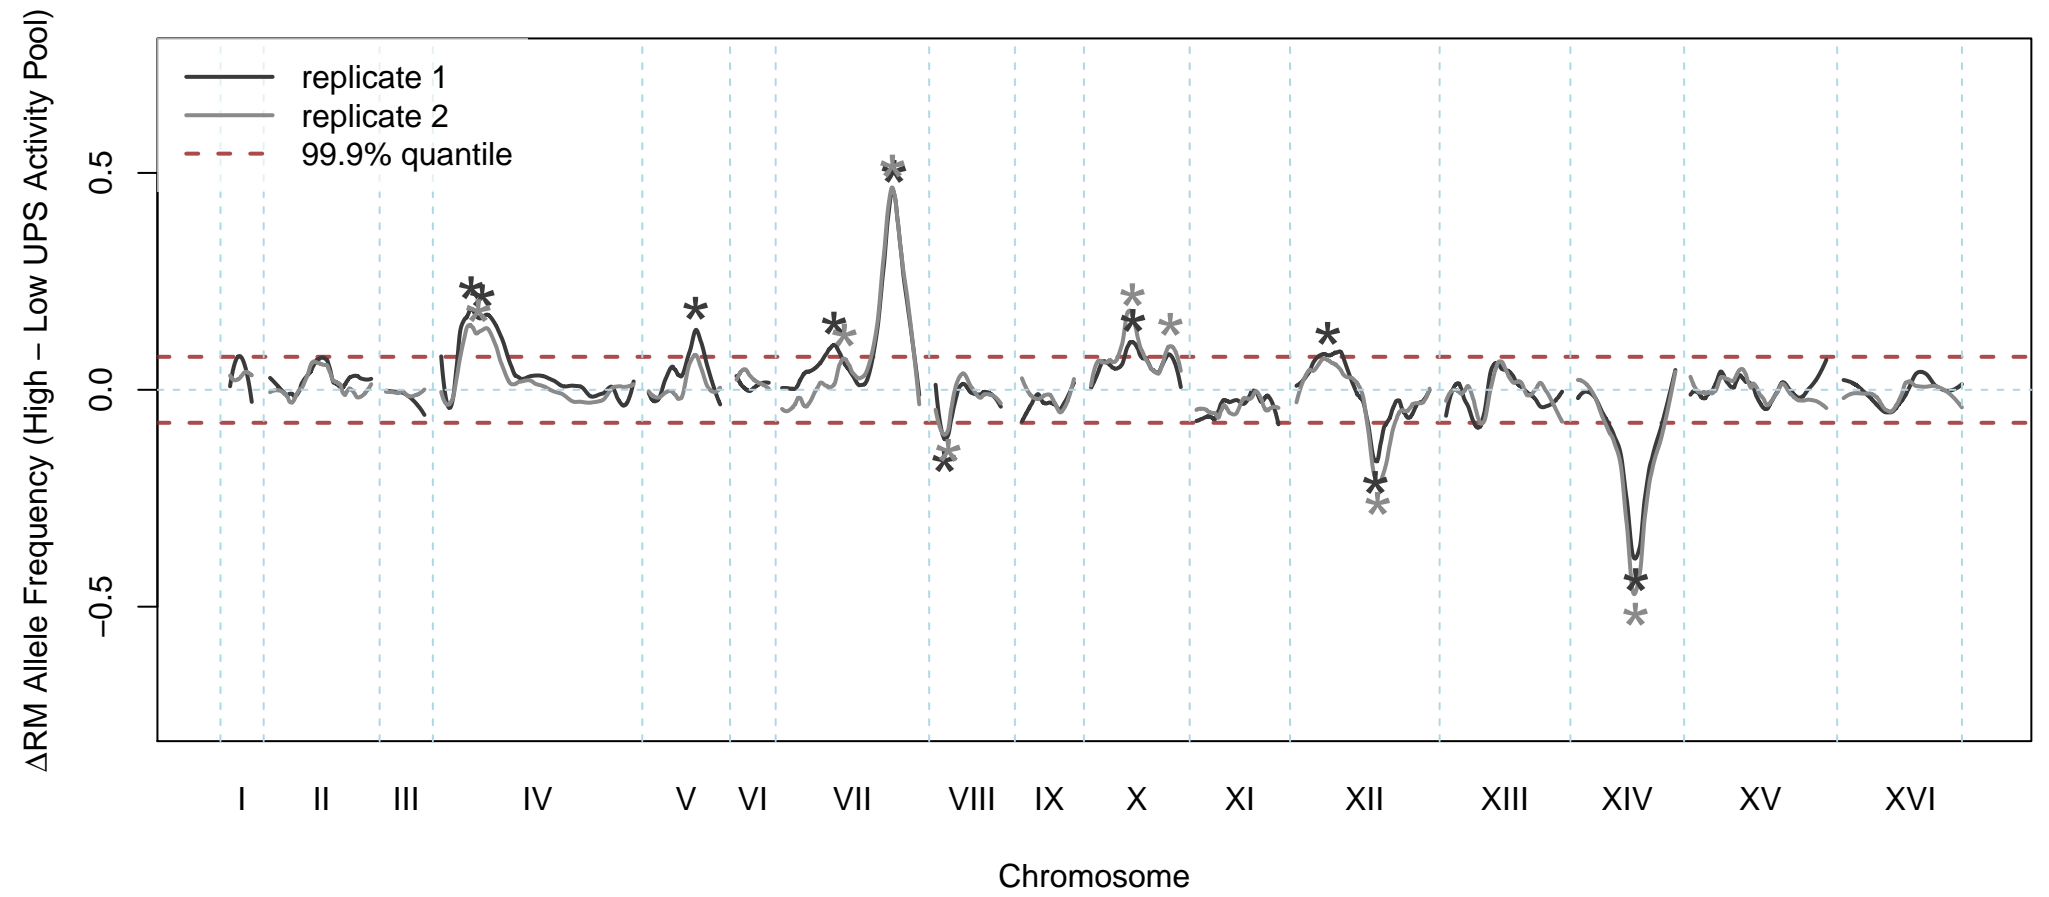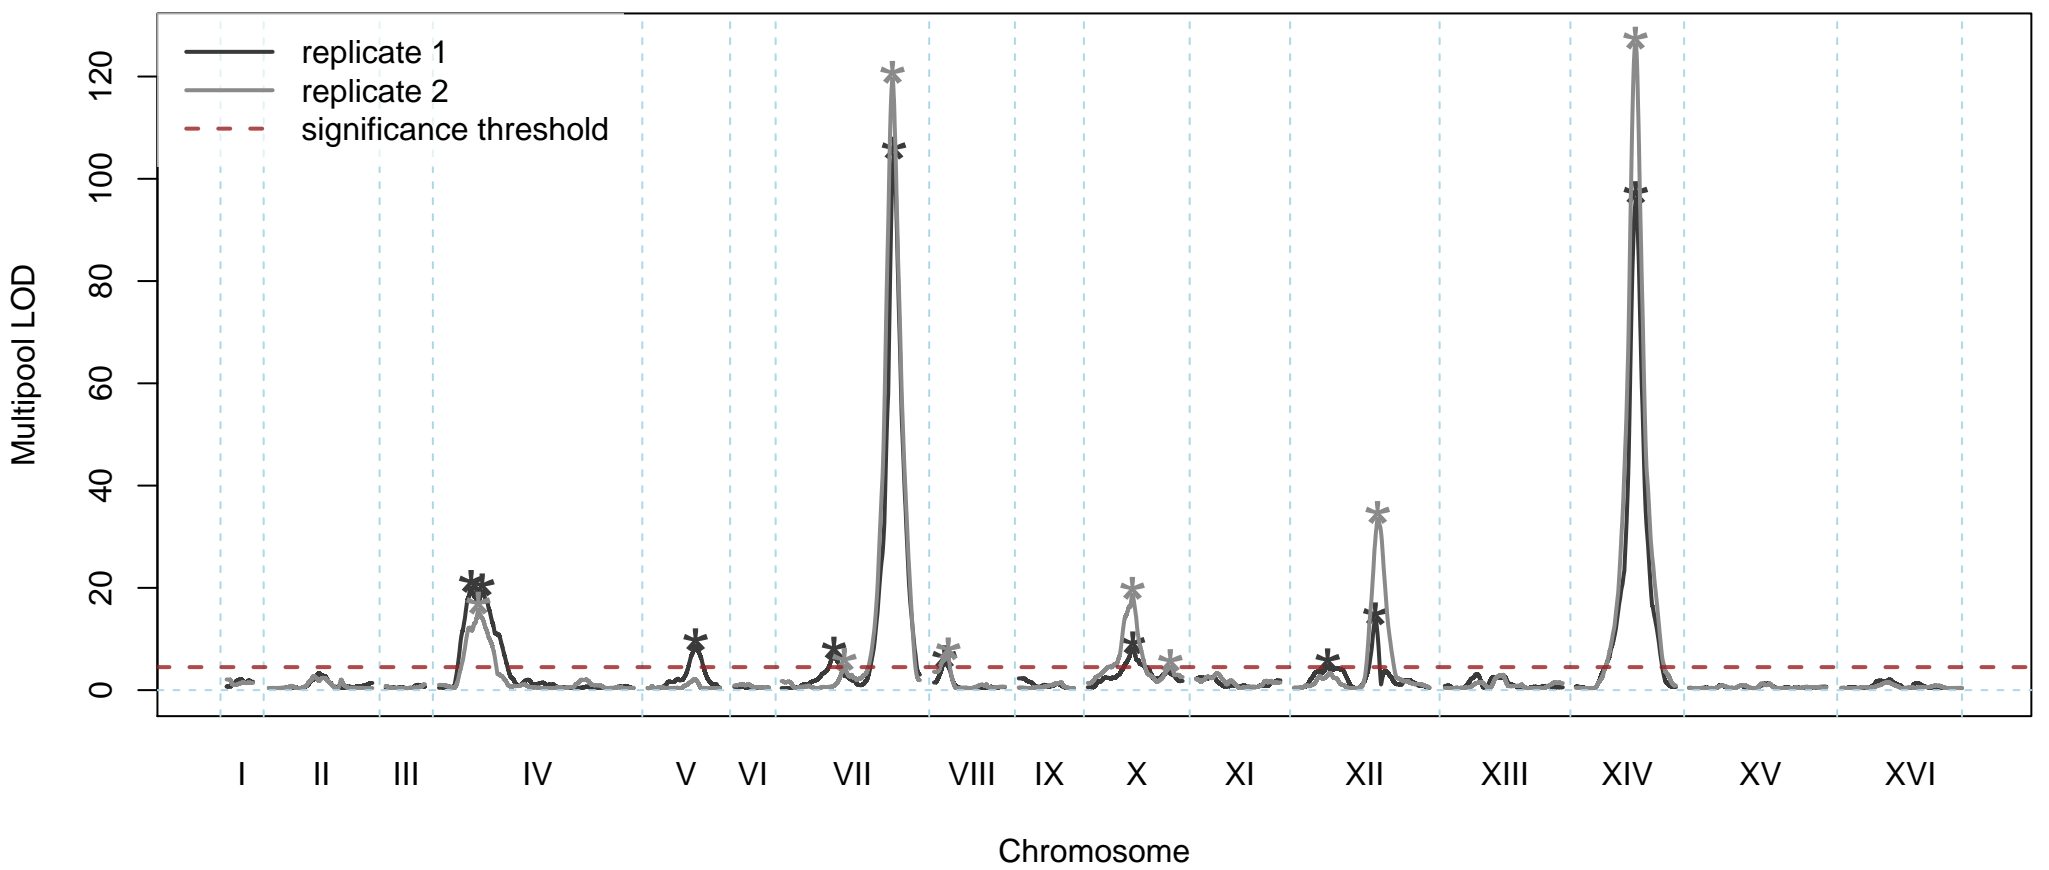

### Val N-end TFT

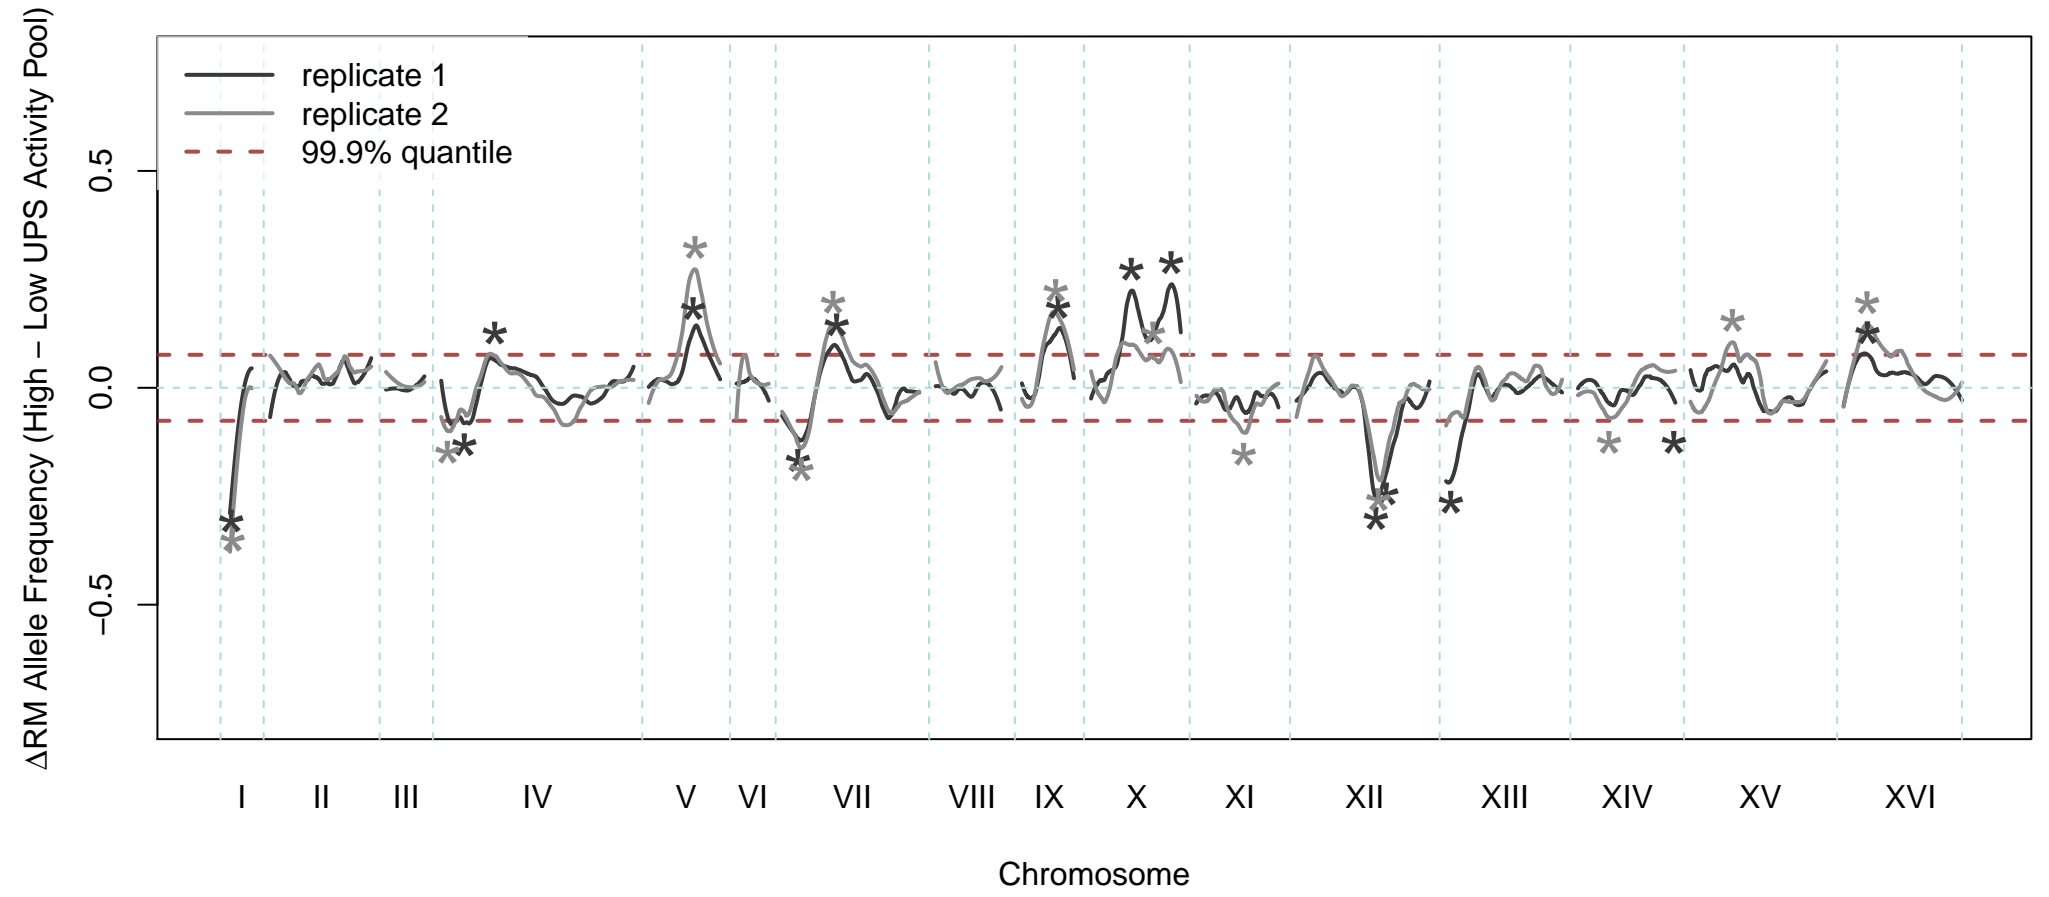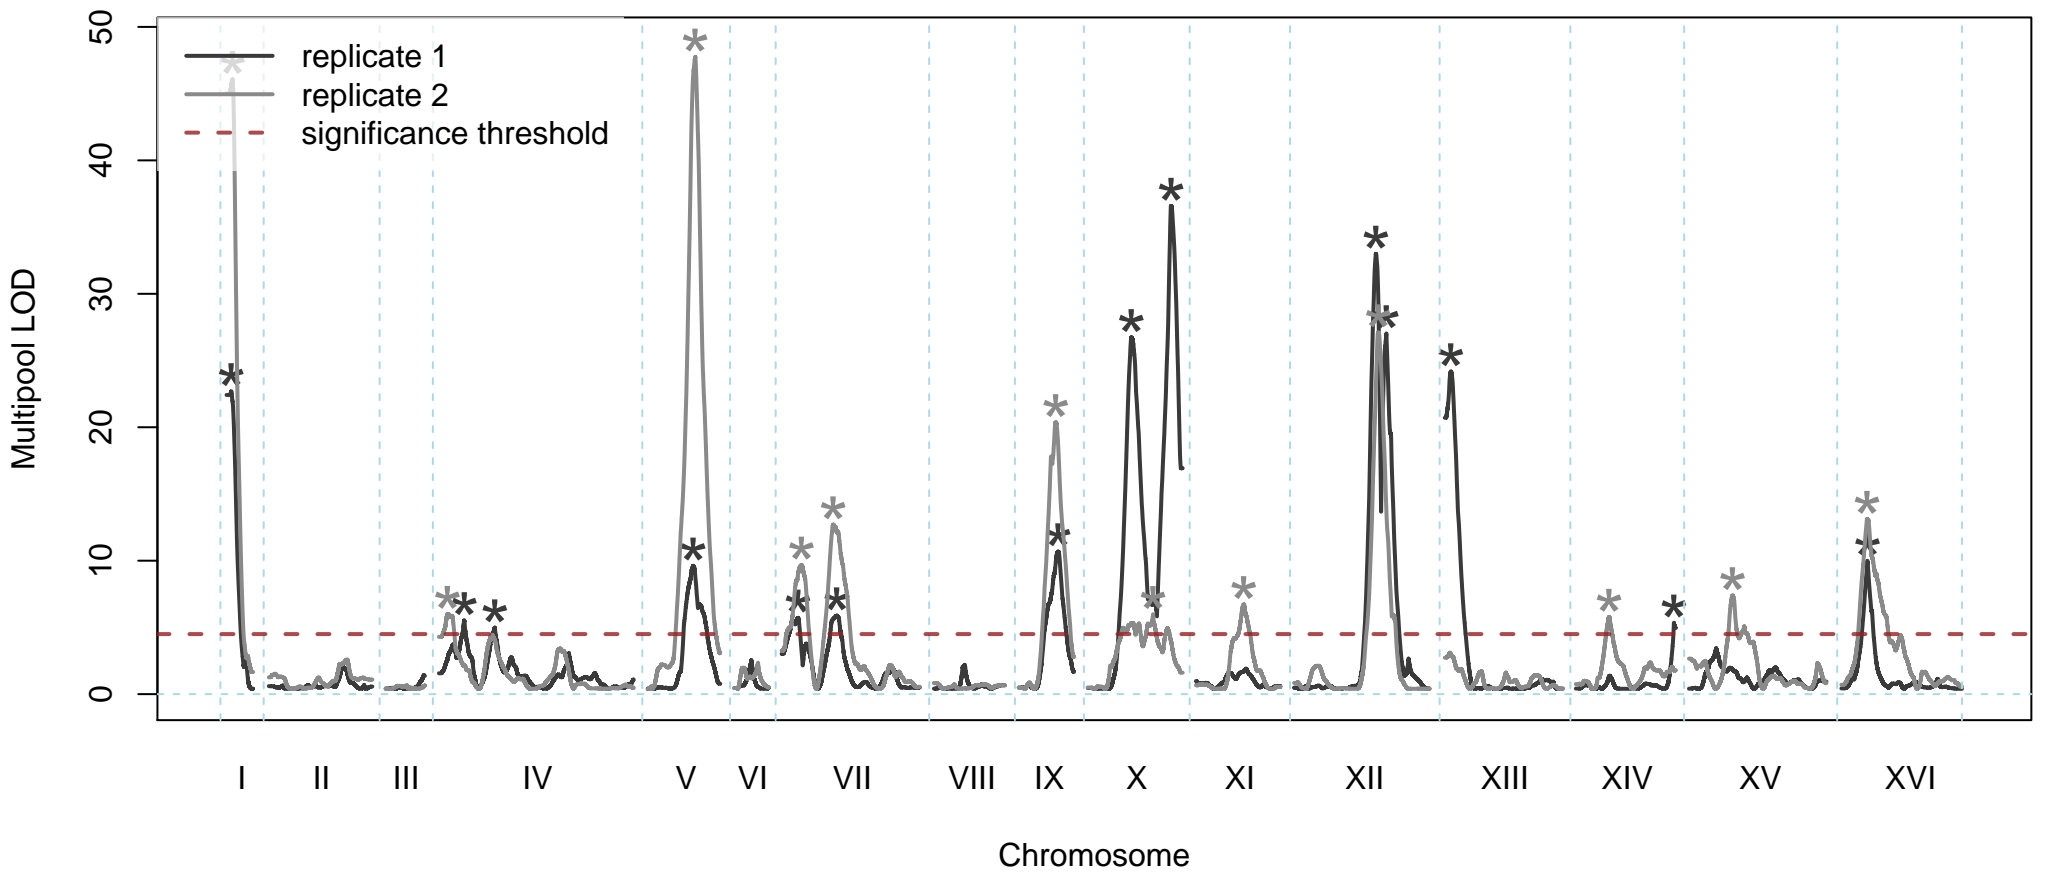

Supplement: supp1 [file elife-79570-supp1-v2.pdf]
