# Supplementary material for: Variation in ubiquitin system genes creates substrate-specific effects on proteasomal protein degradation
Source: eLife journal article supplement (doi:10.7554/elife.79570), 2022-10-11

### Chromosome Ia 5021..52122 (Ac/N-end specific)

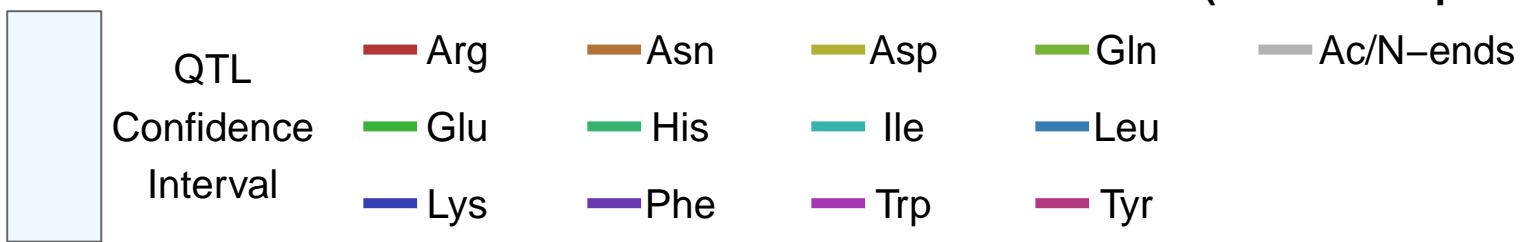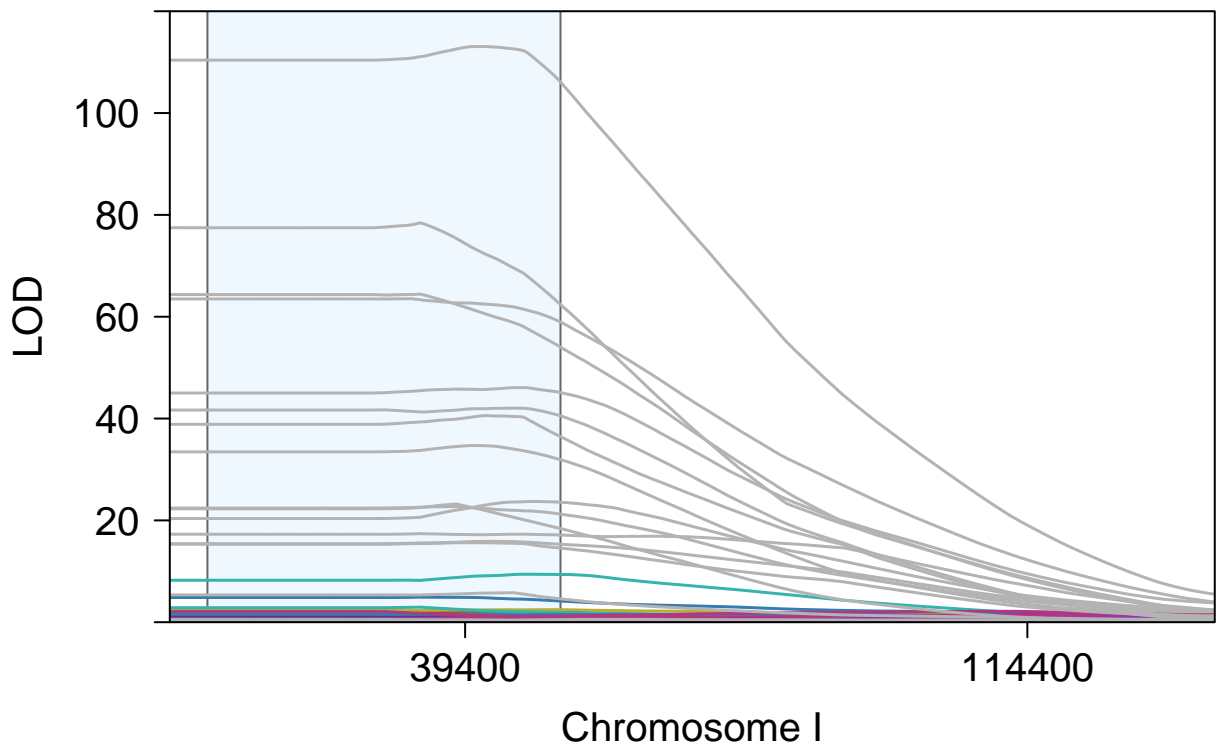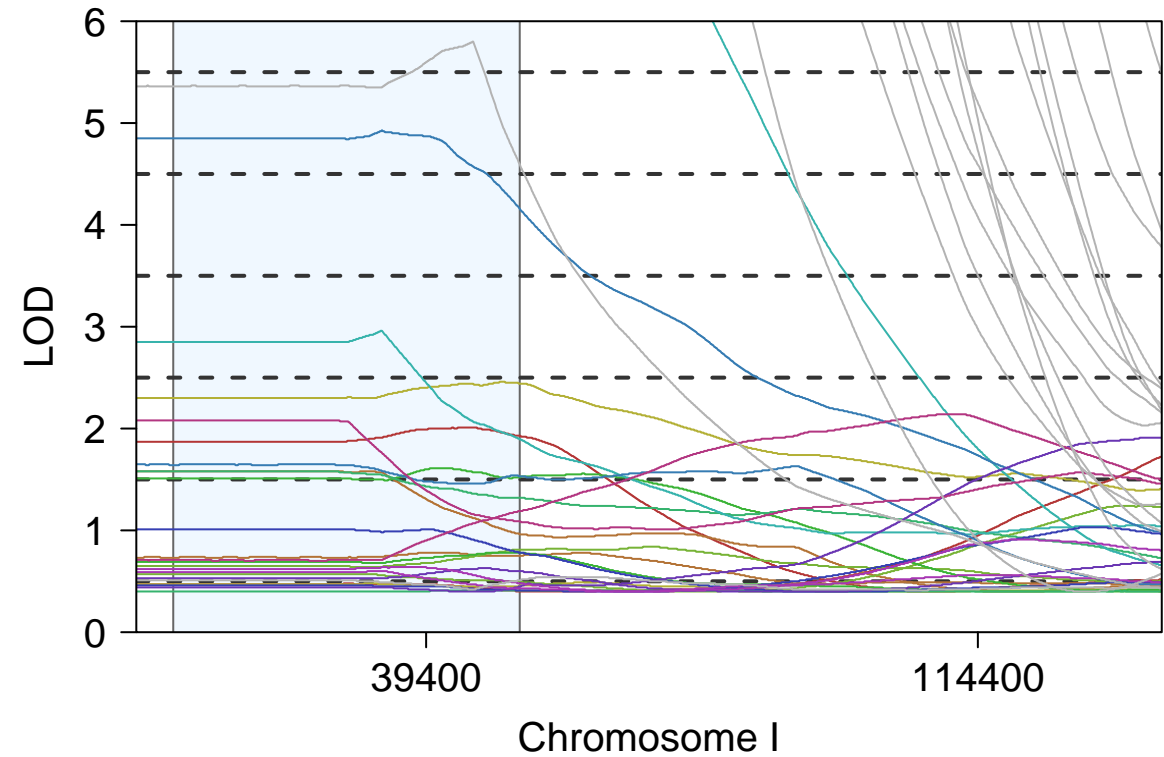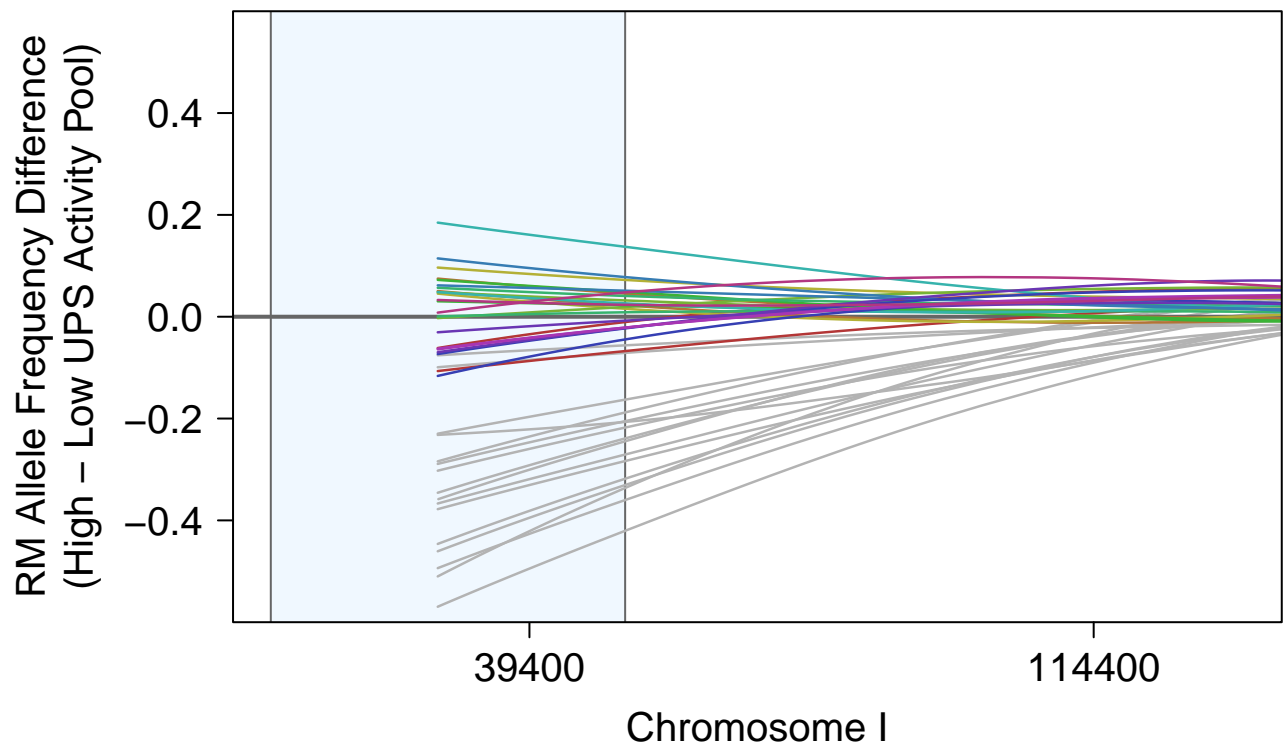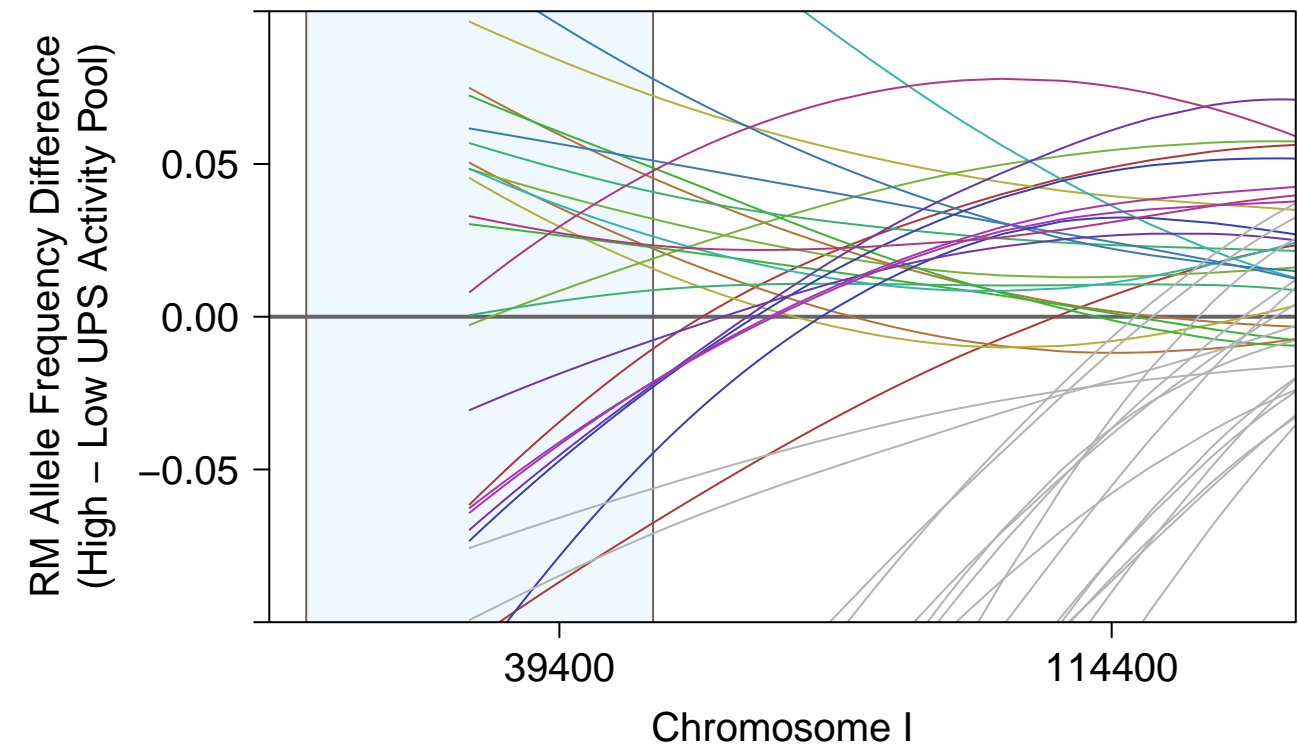

### Chromosome IIa 473450..573934 (Arg/N-end specific)

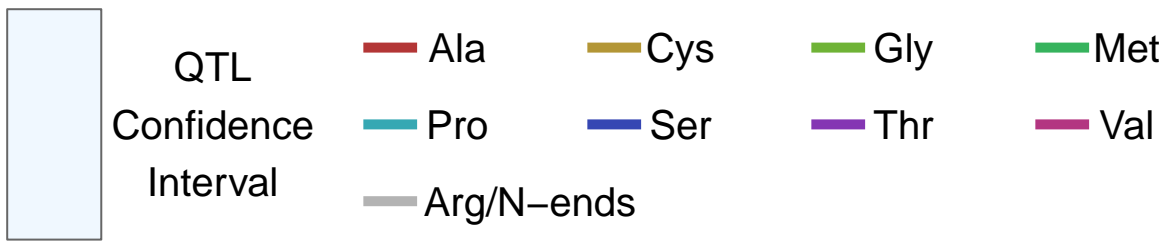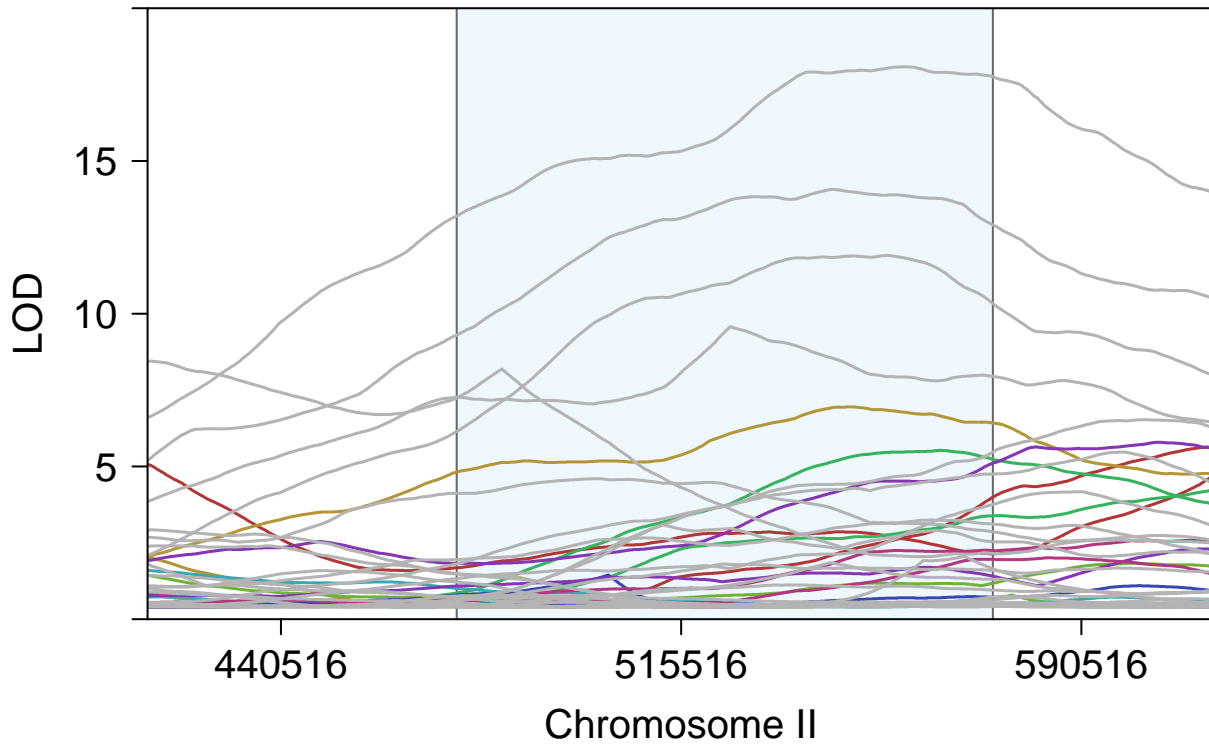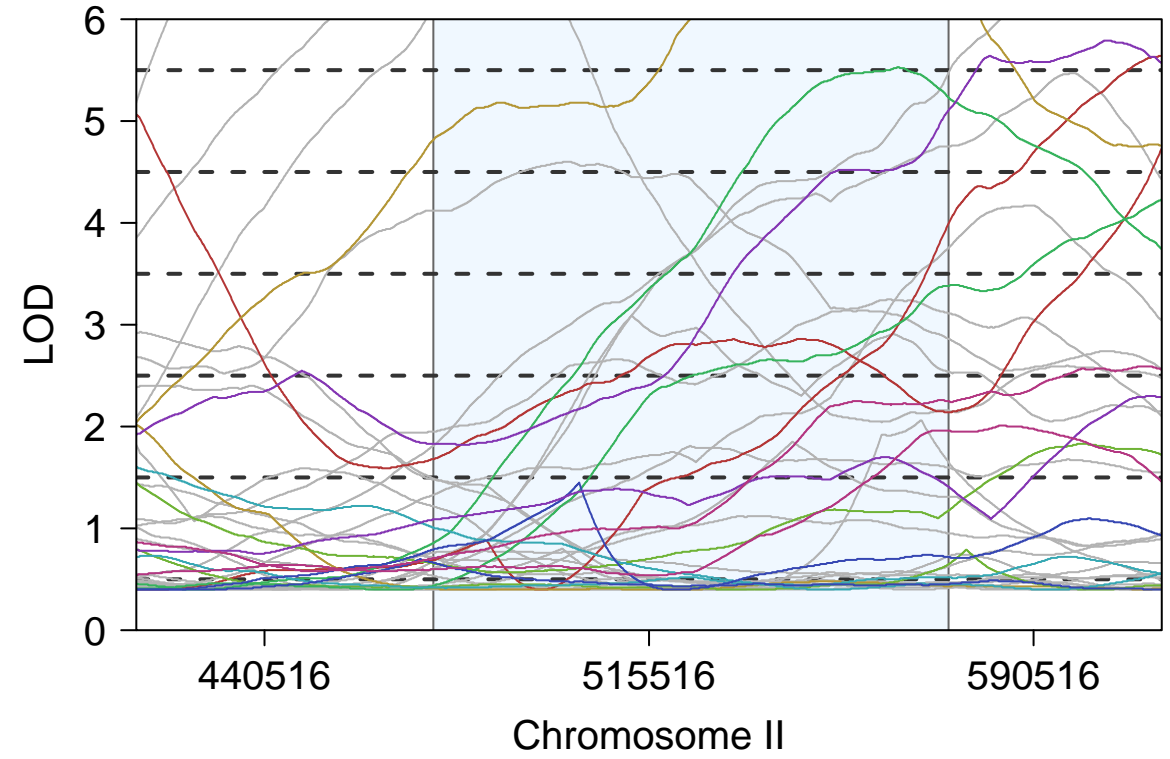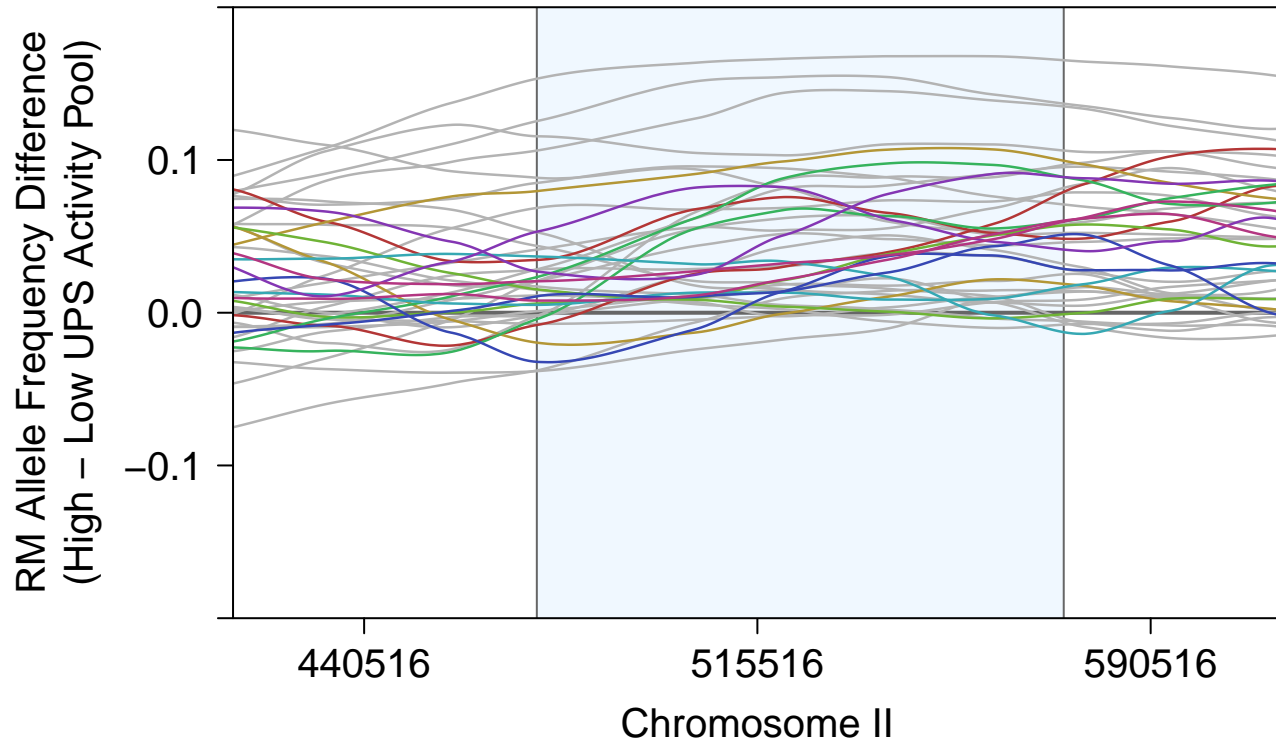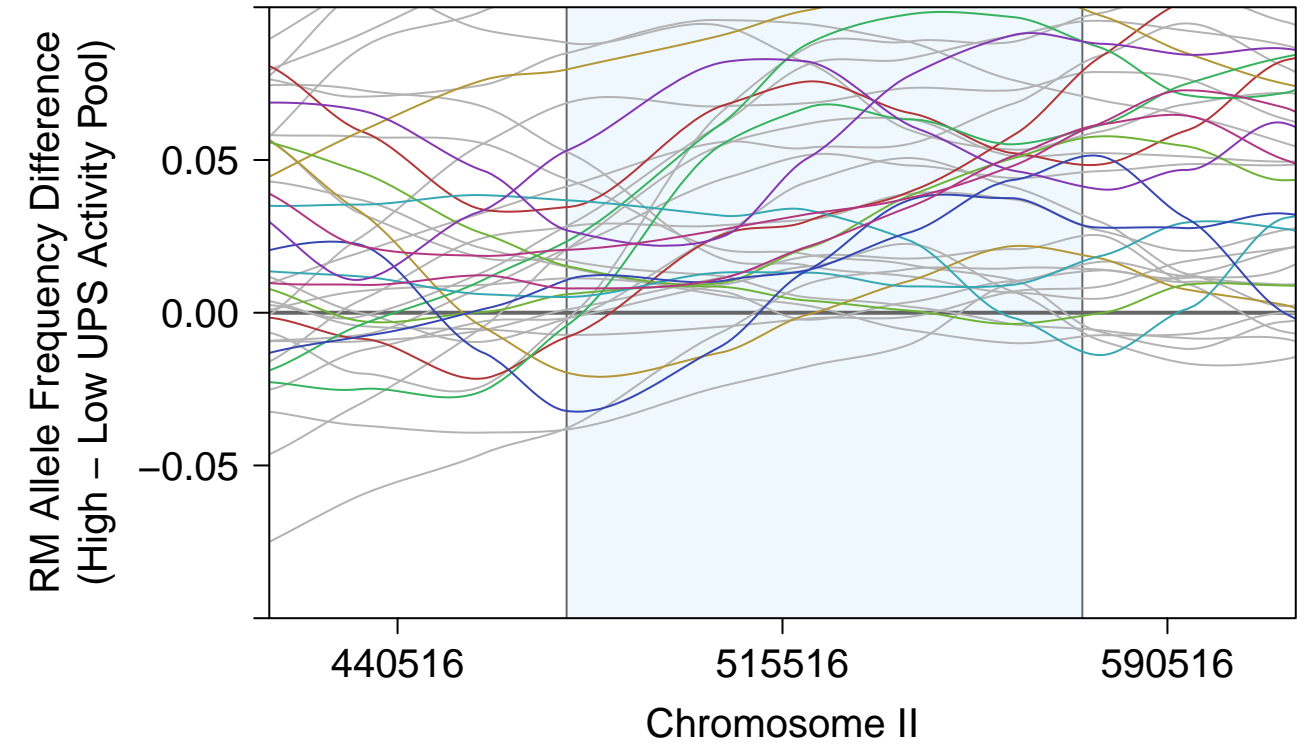

### Chromosome IVb 273175..362600 (Arg/N-end specific)

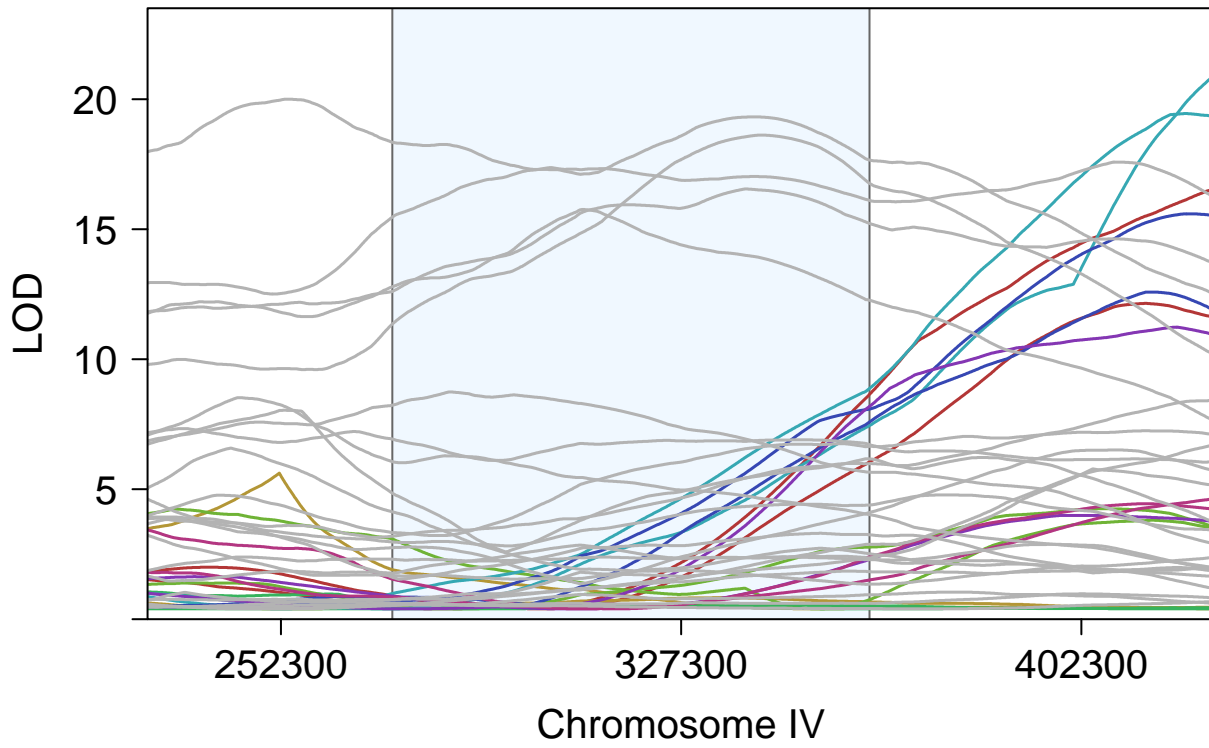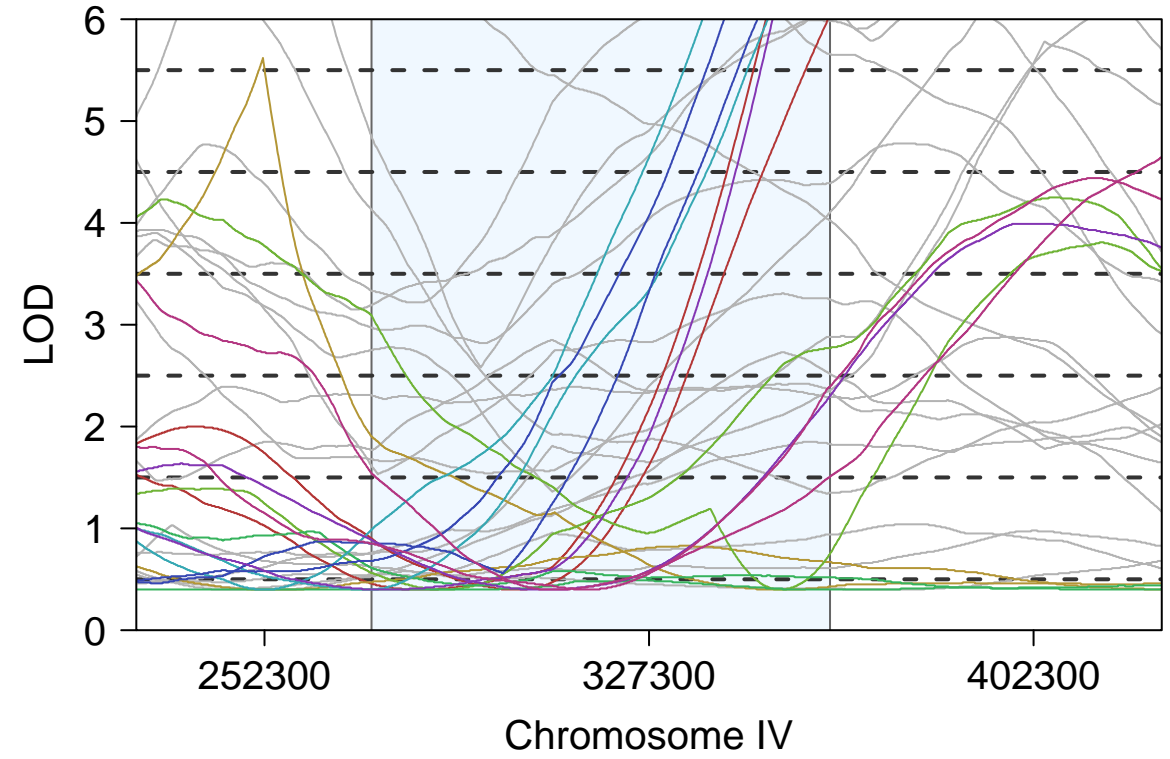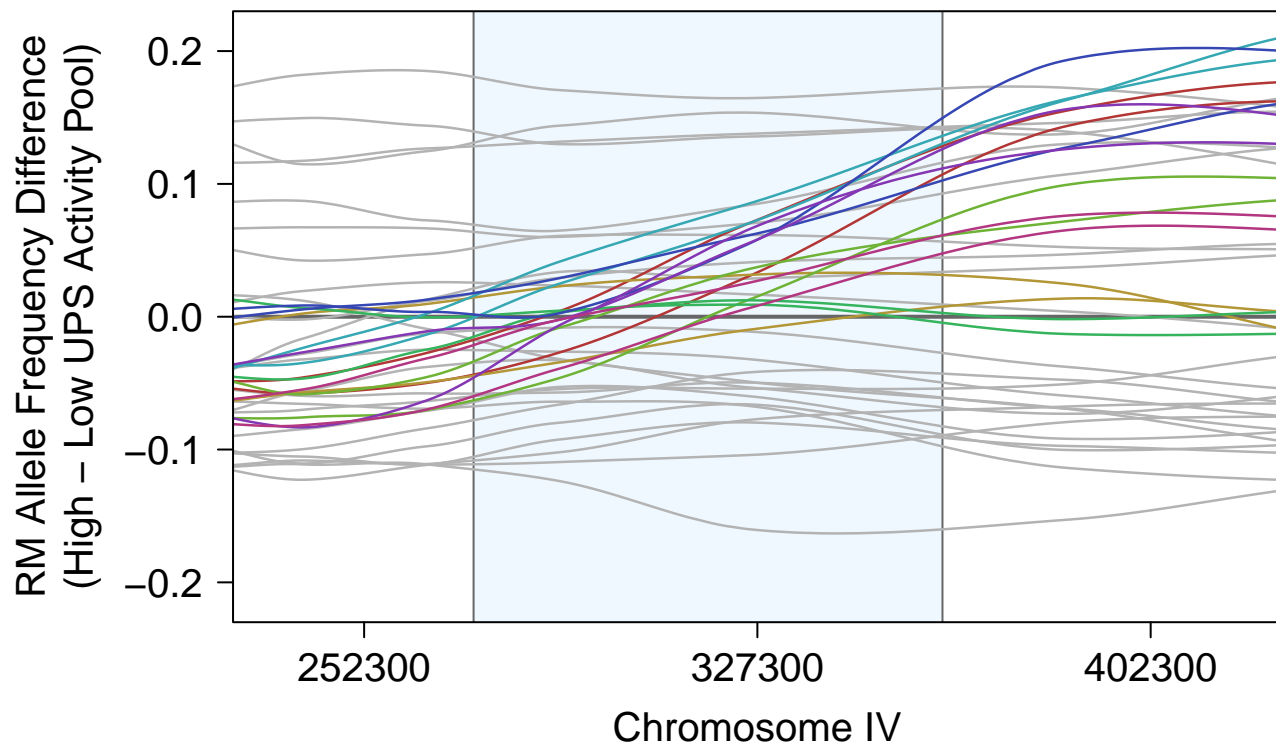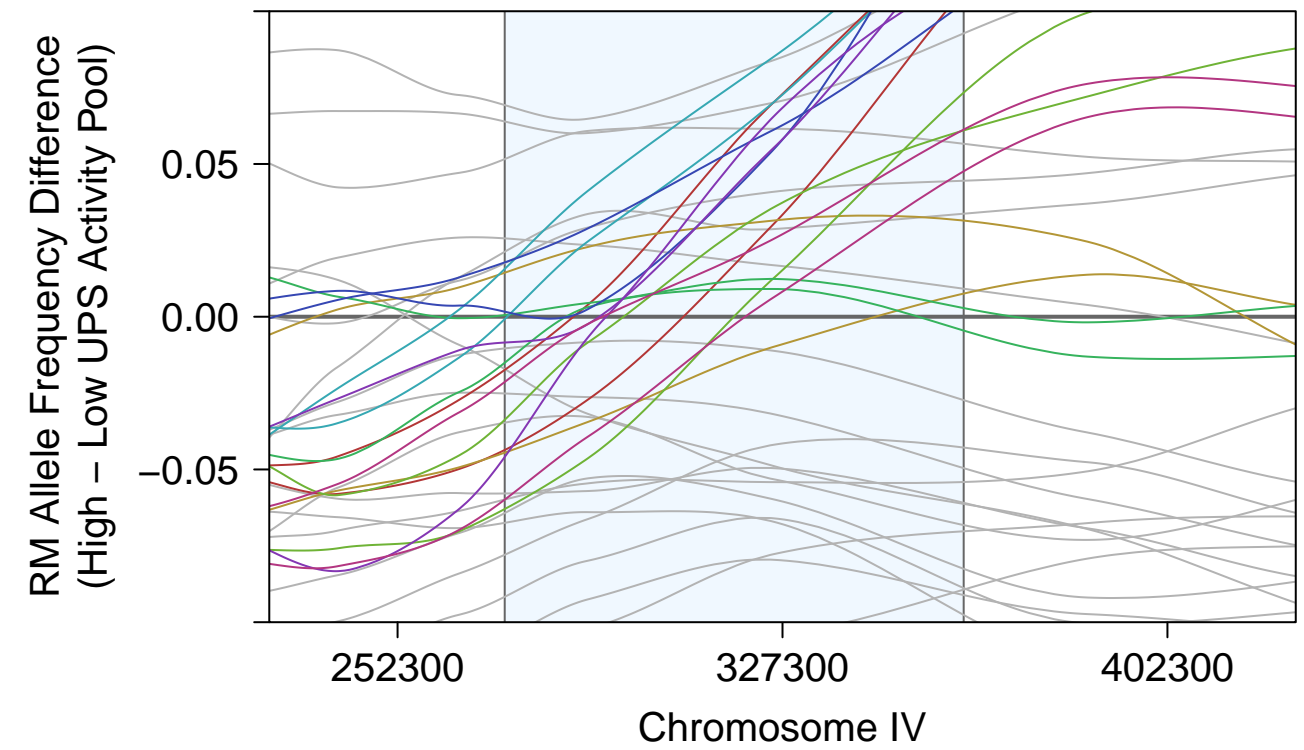

### Chromosome IVd 392275..557000 (Arg/N-end specific)

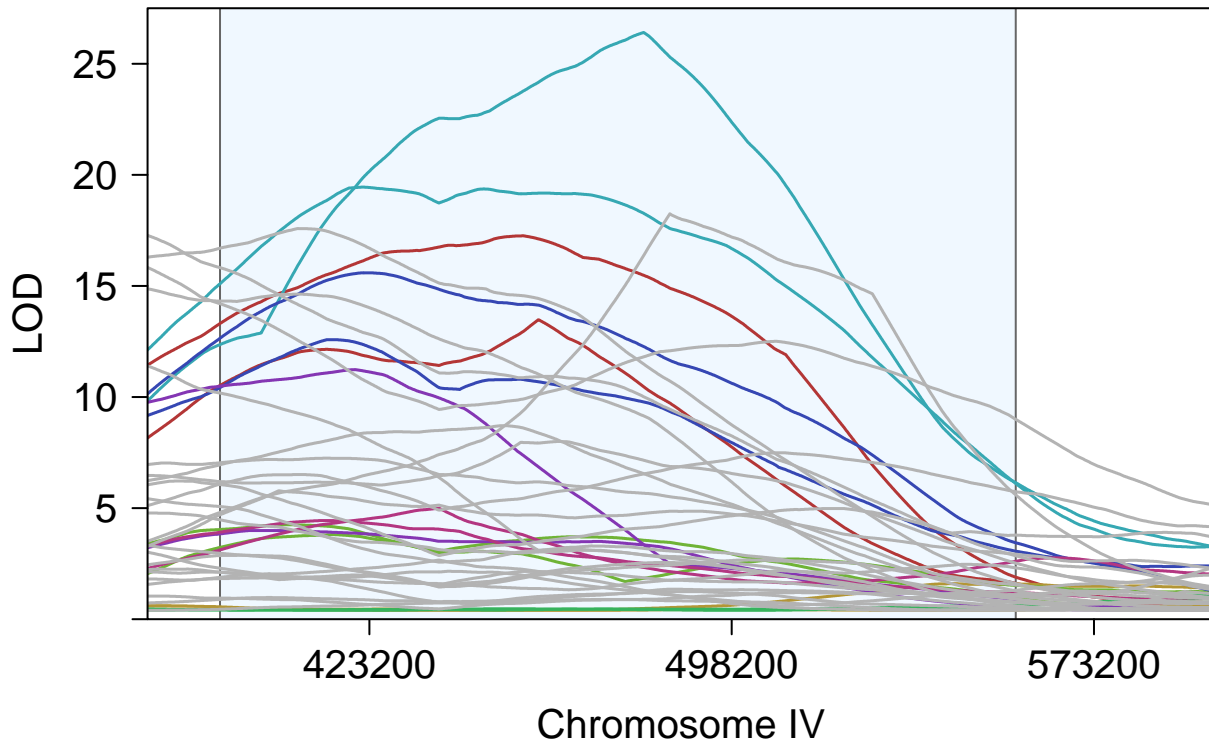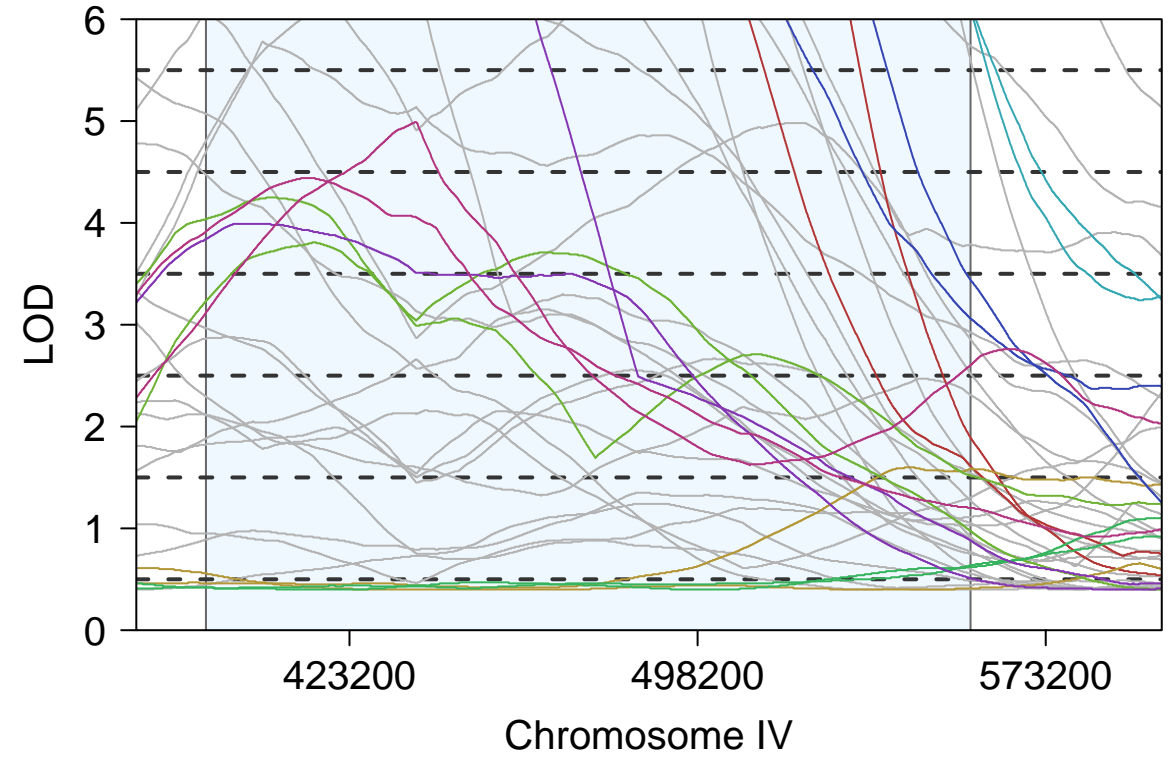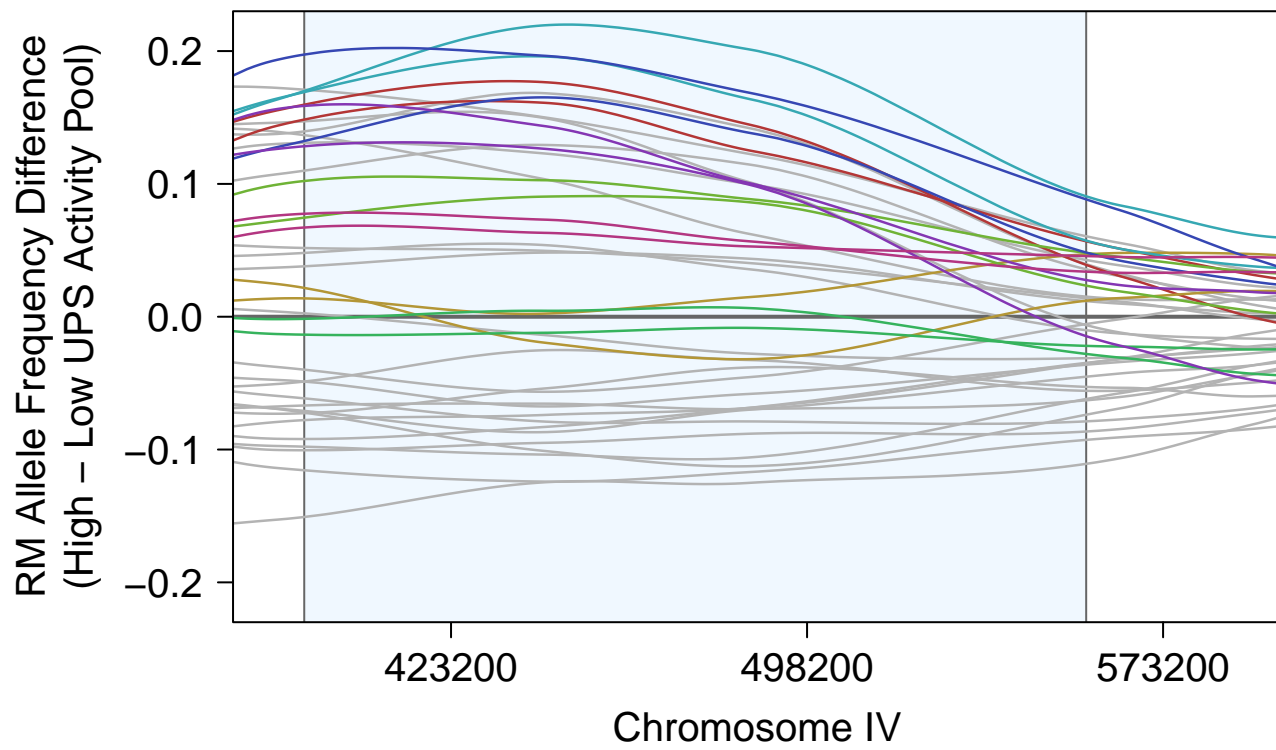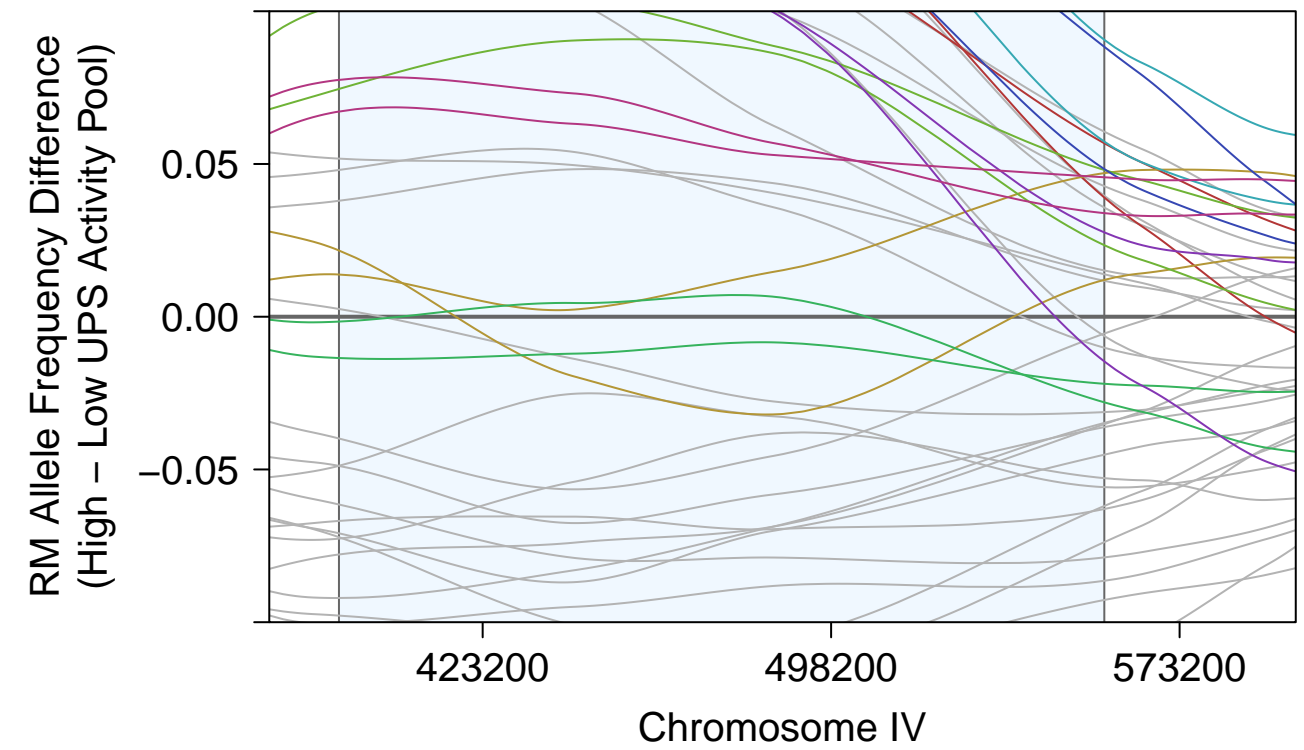

### Chromosome Va 351400..396250 (Ac/N-end specific)

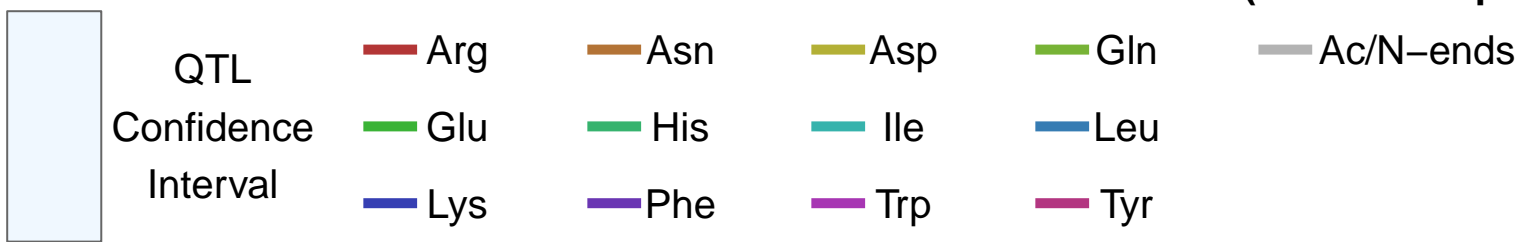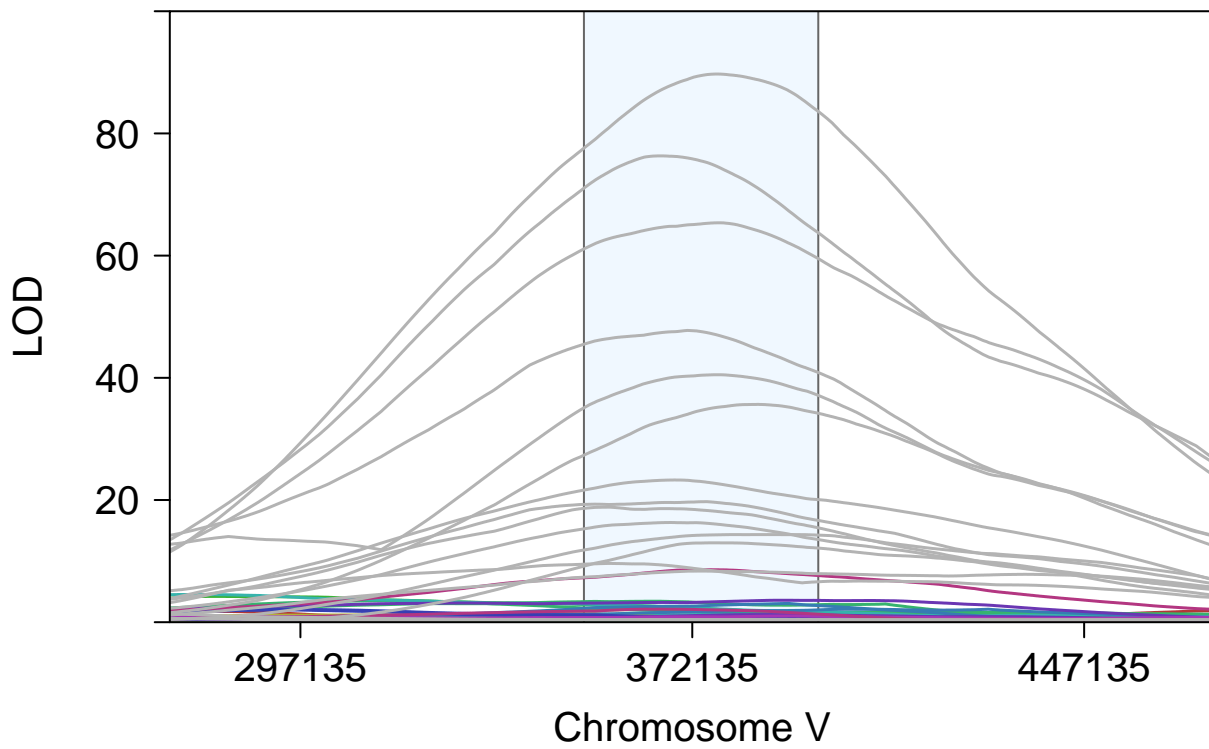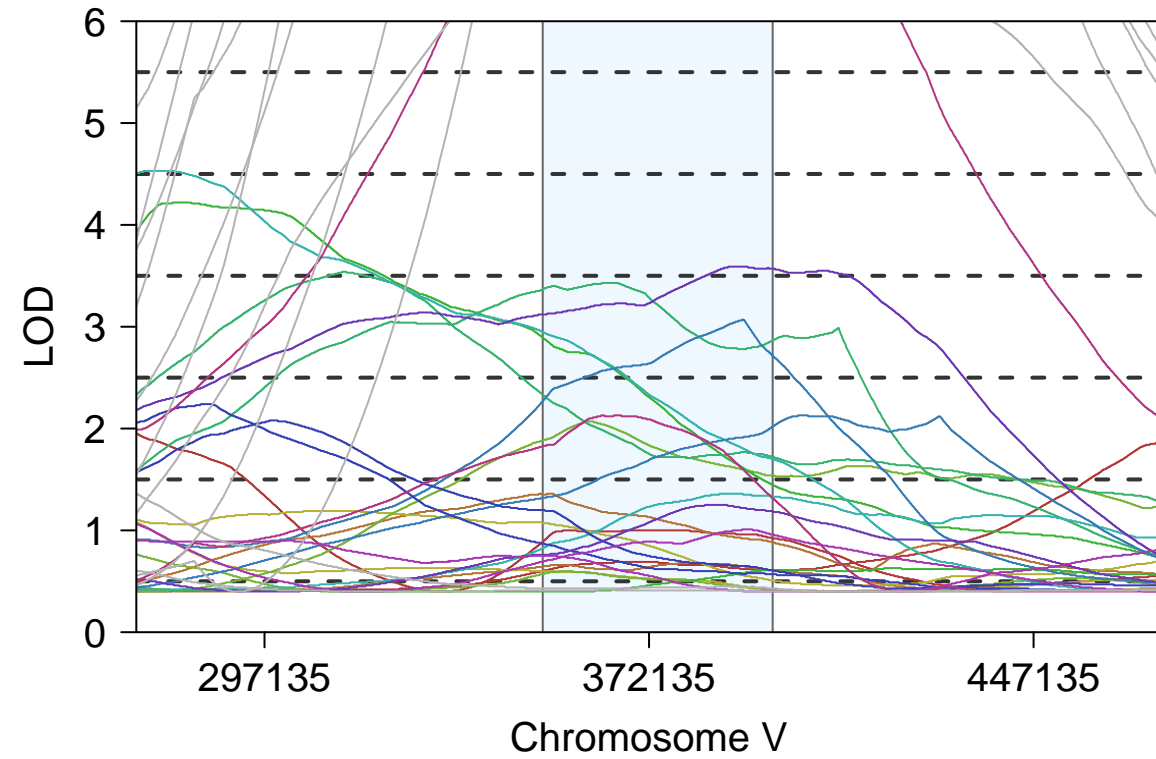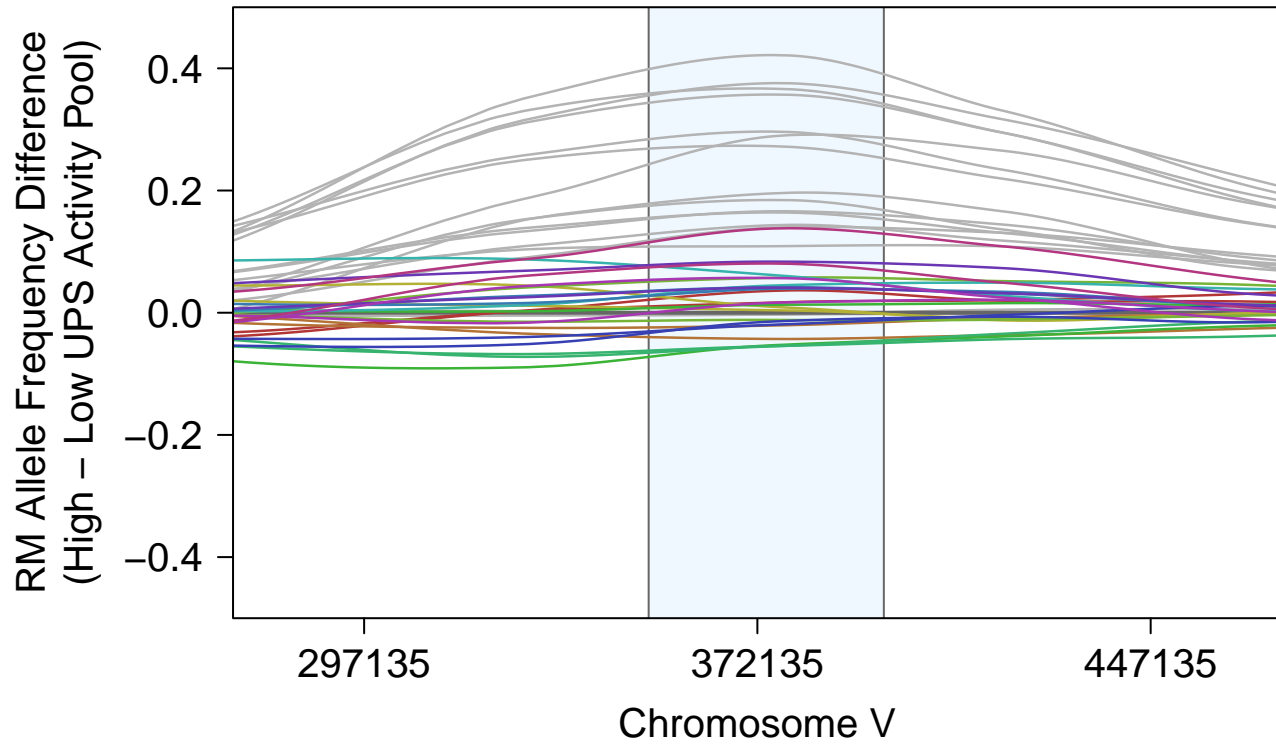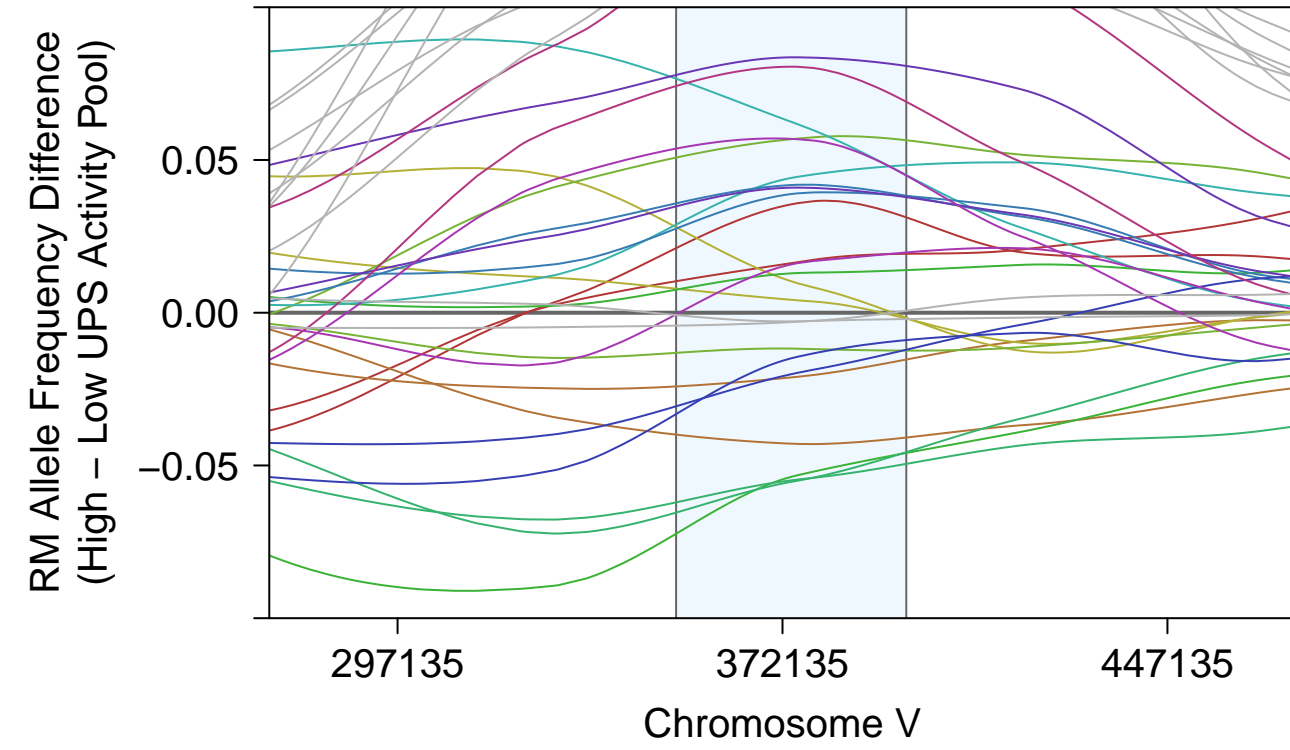

### Chromosome VIIb 98178..172279 (Ac/N-end specific)

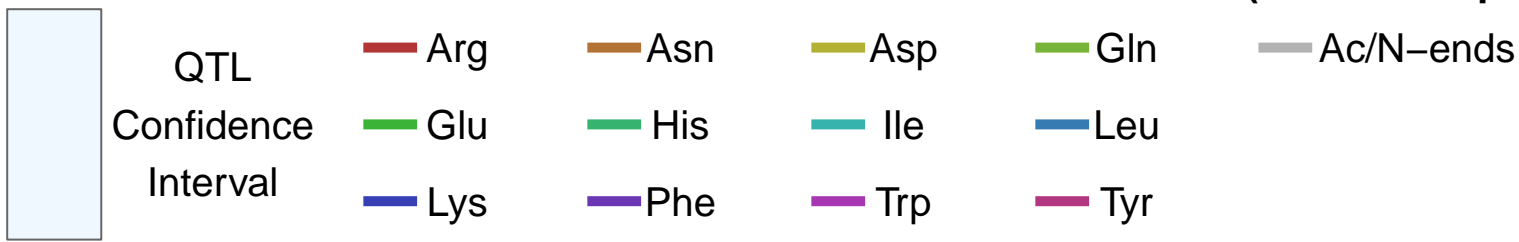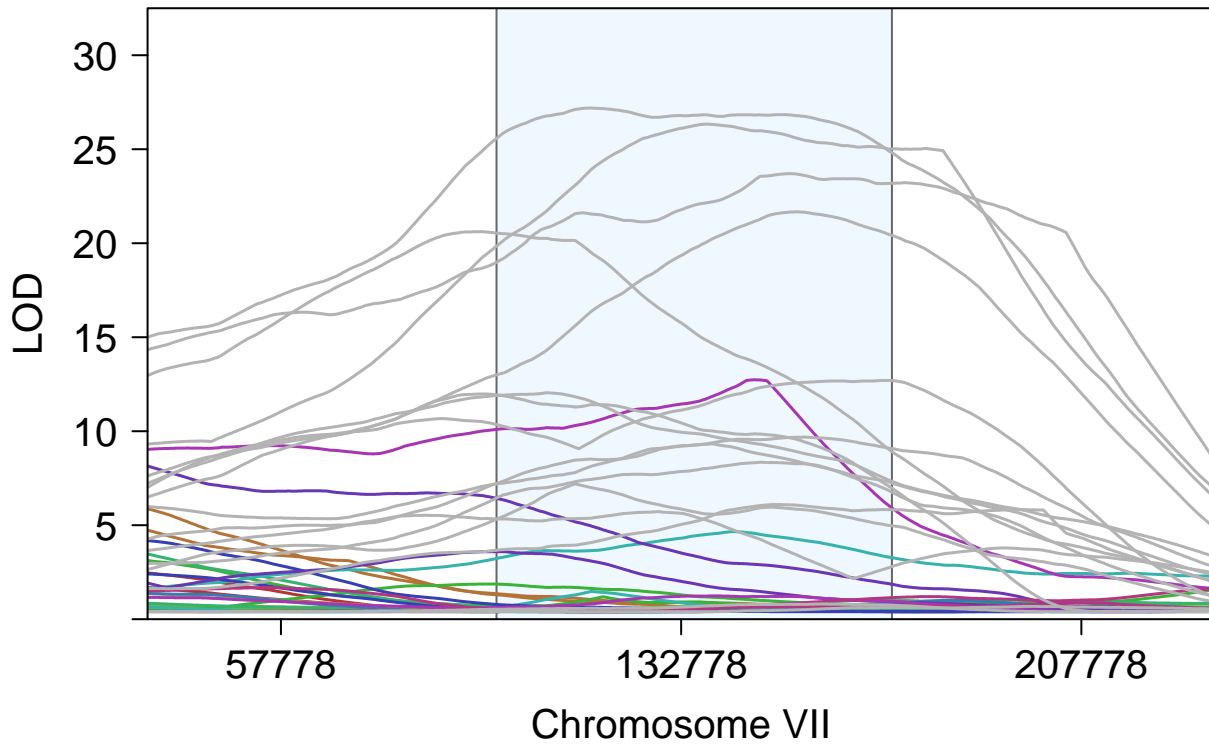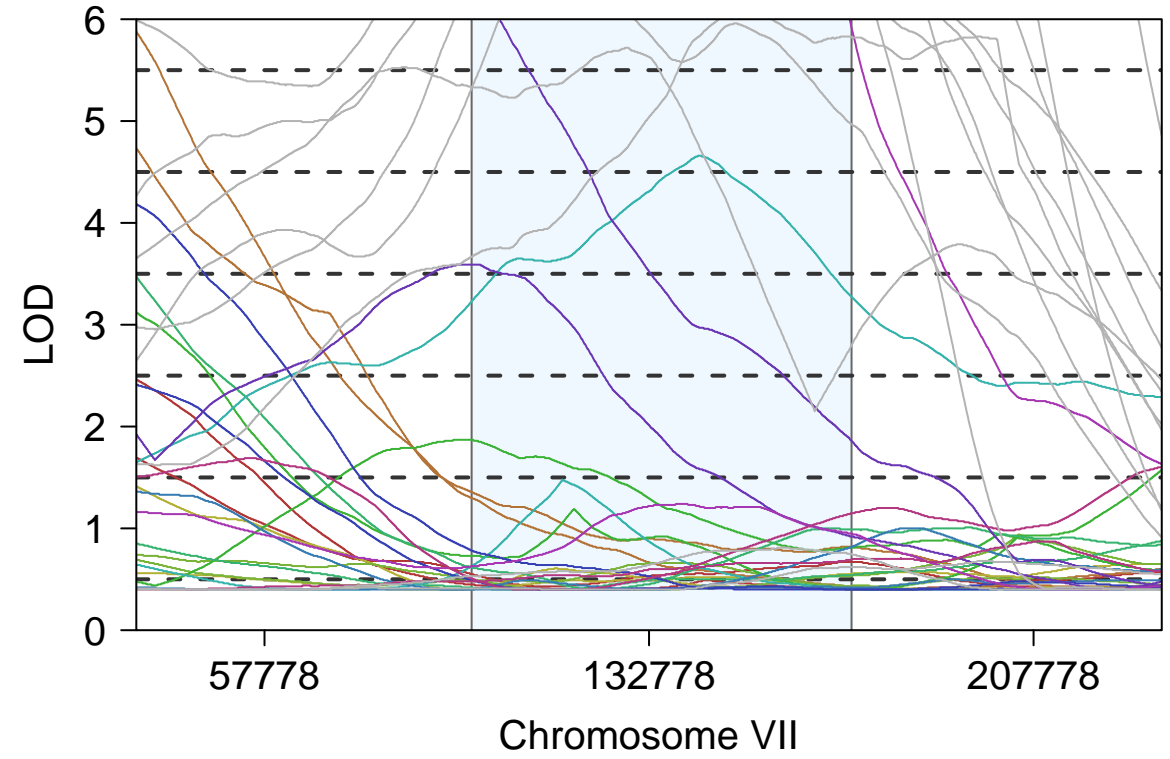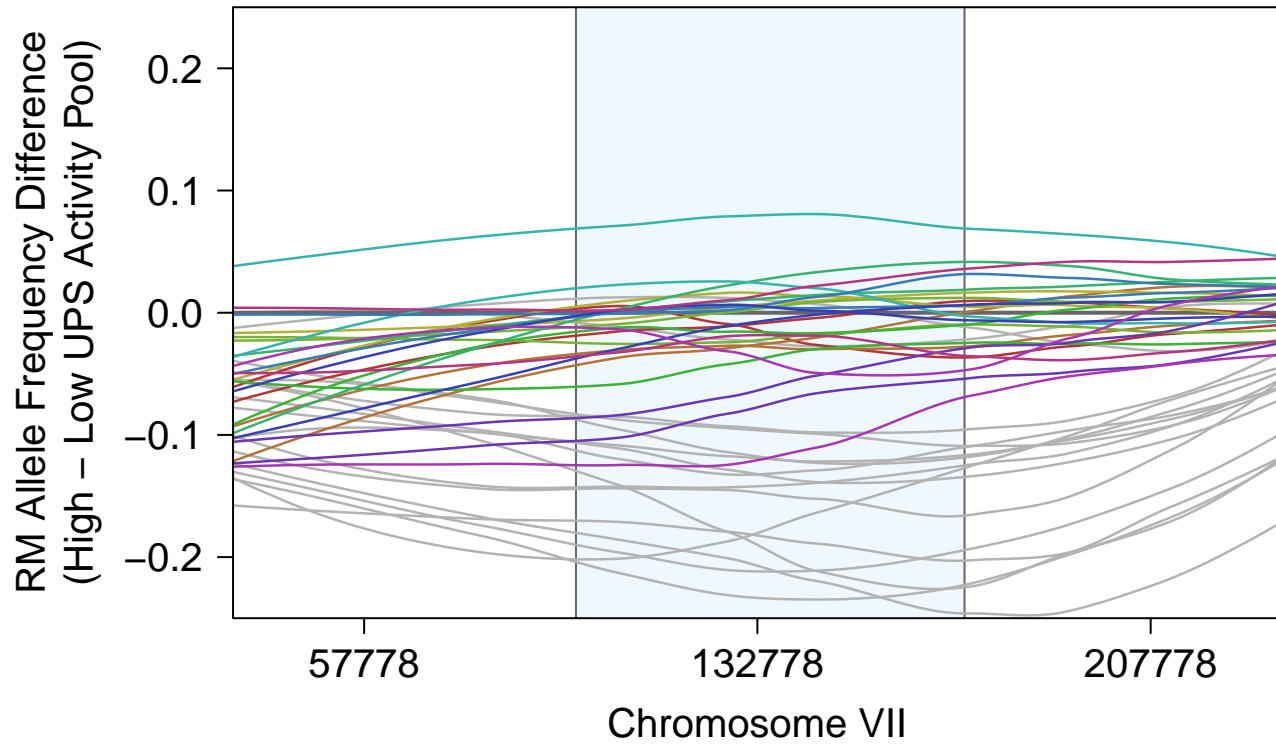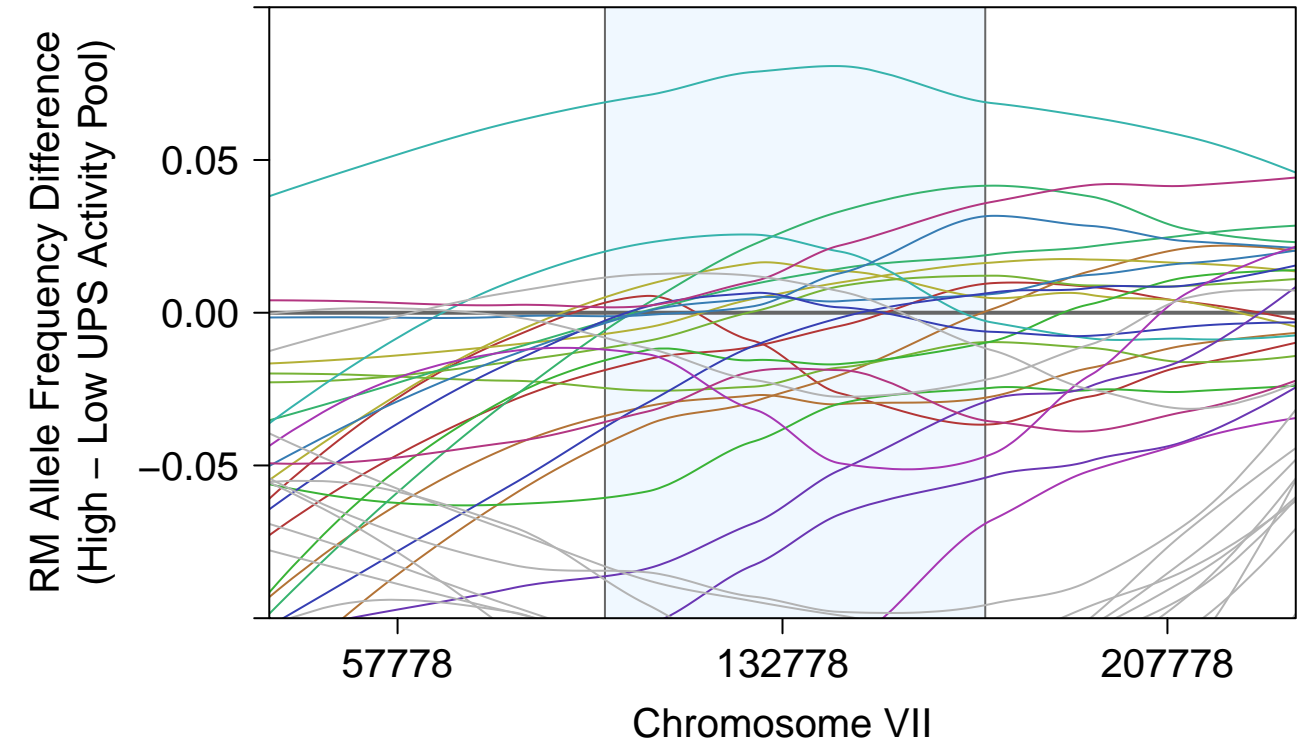

### Chromosome VII d 841300..899934 (Arg/N-end specific)

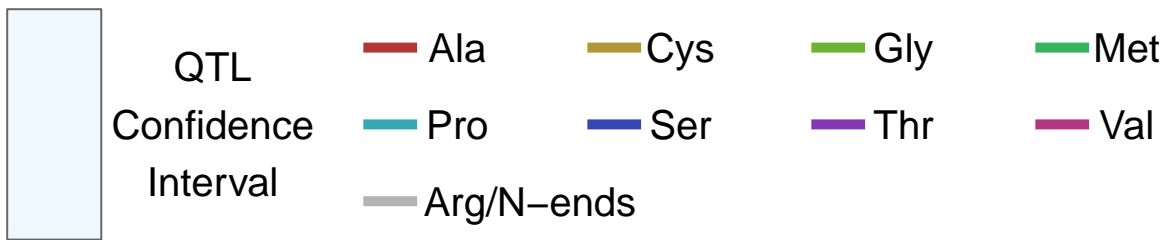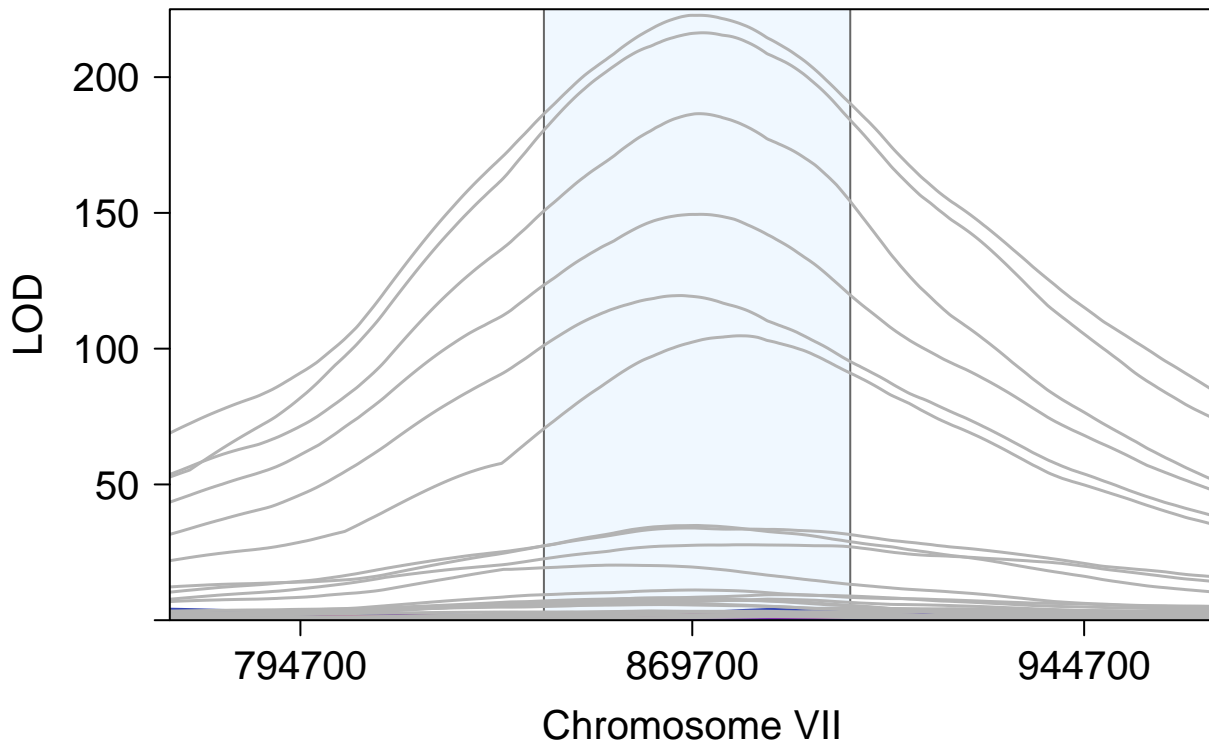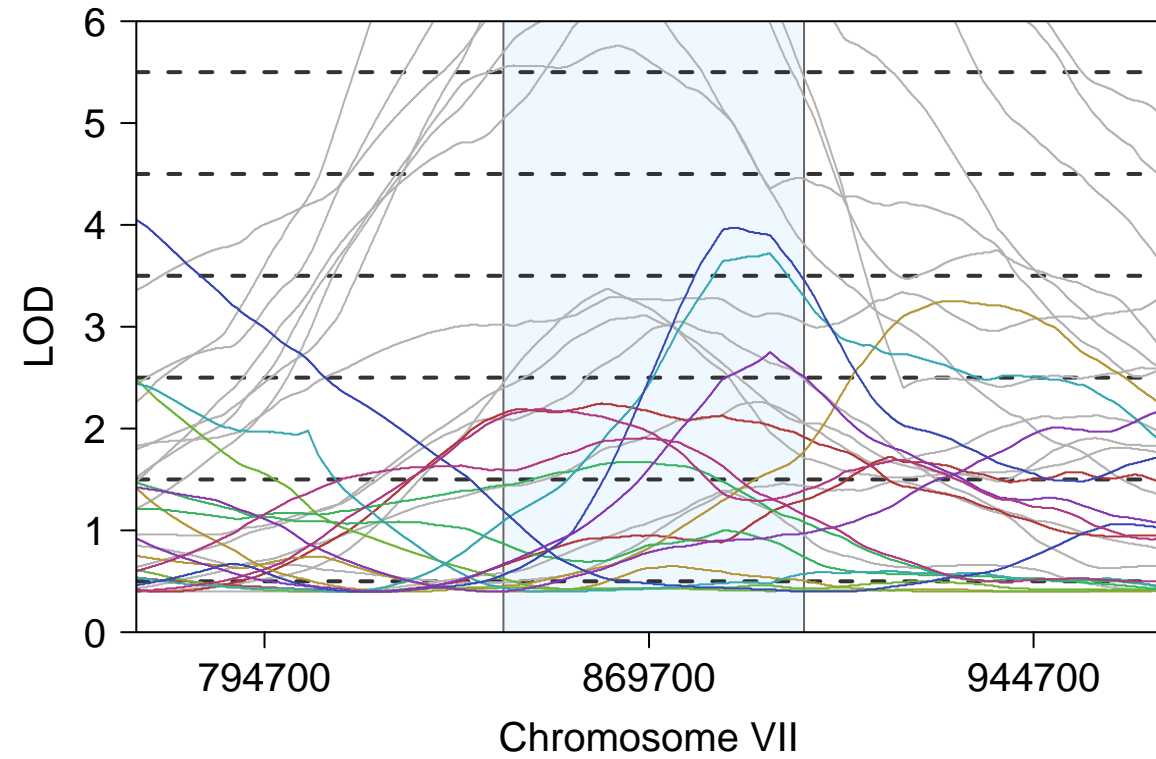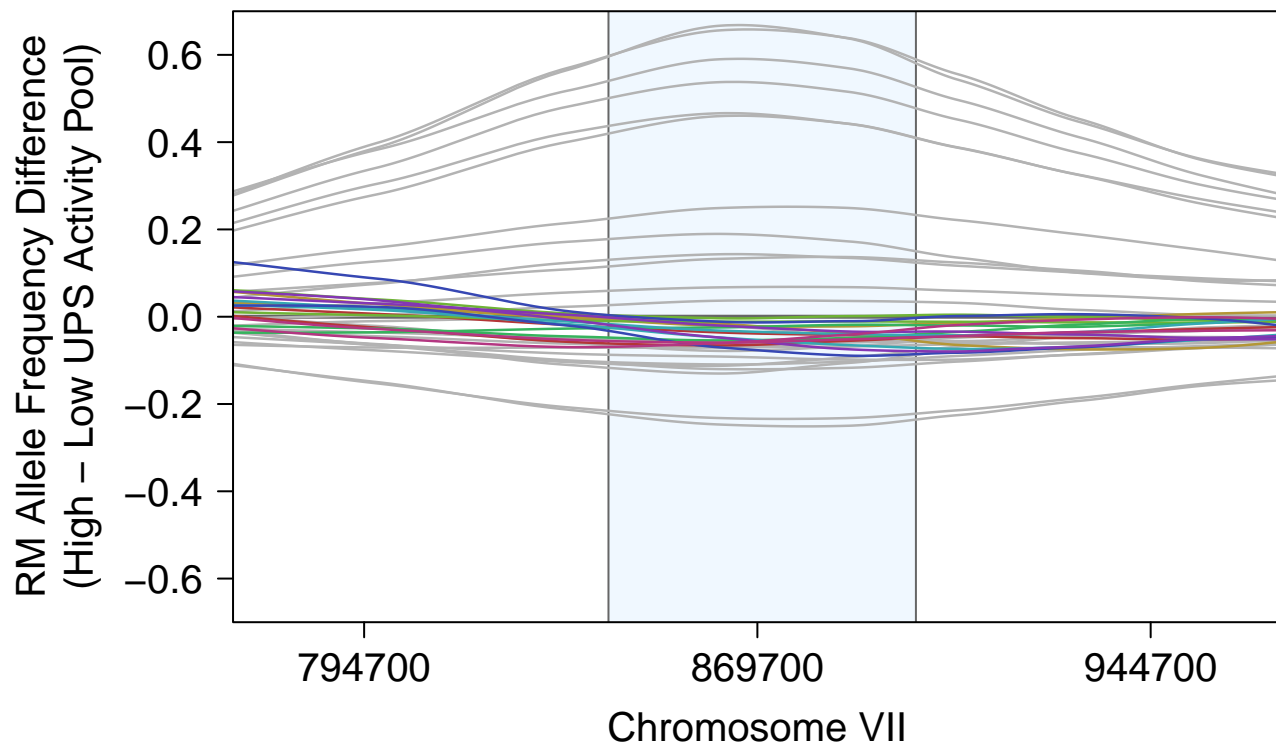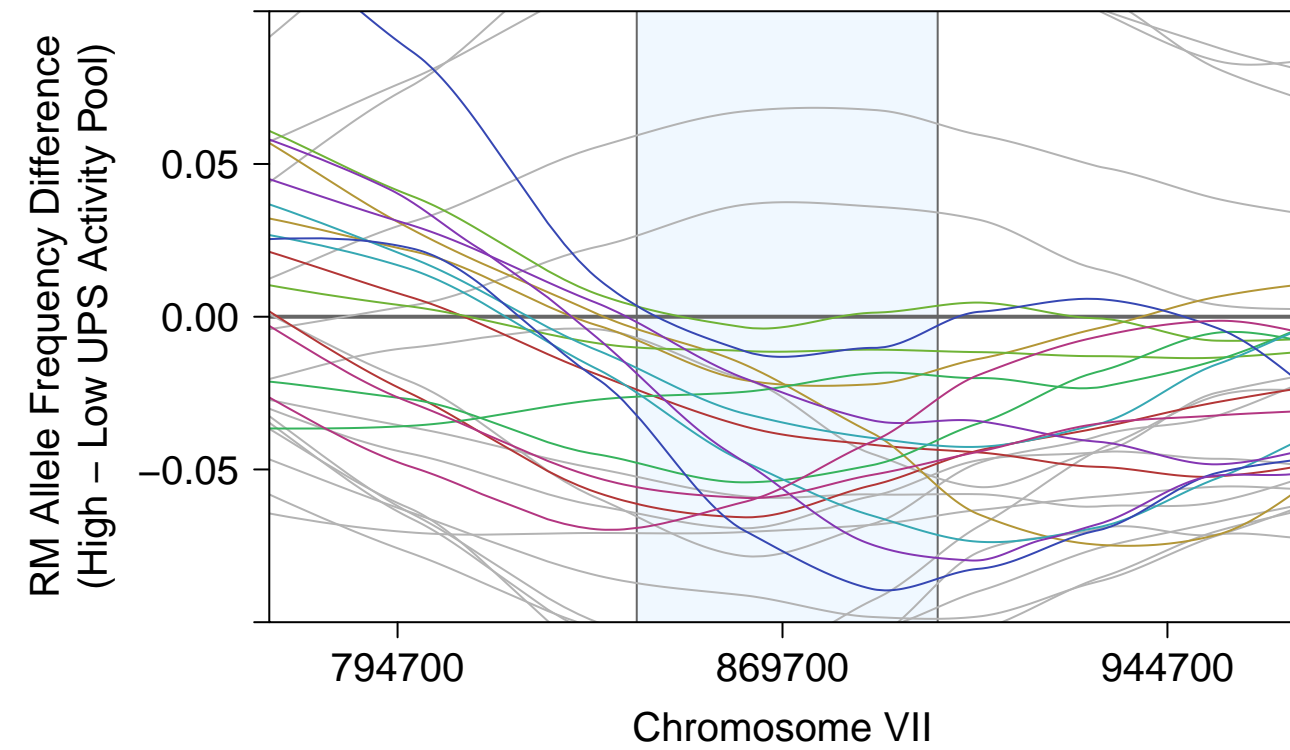

### Chromosome VIIe 856120..883830 (Arg/N-end specific)

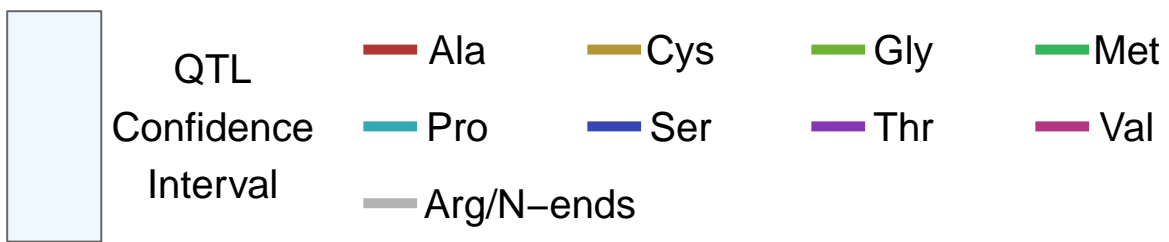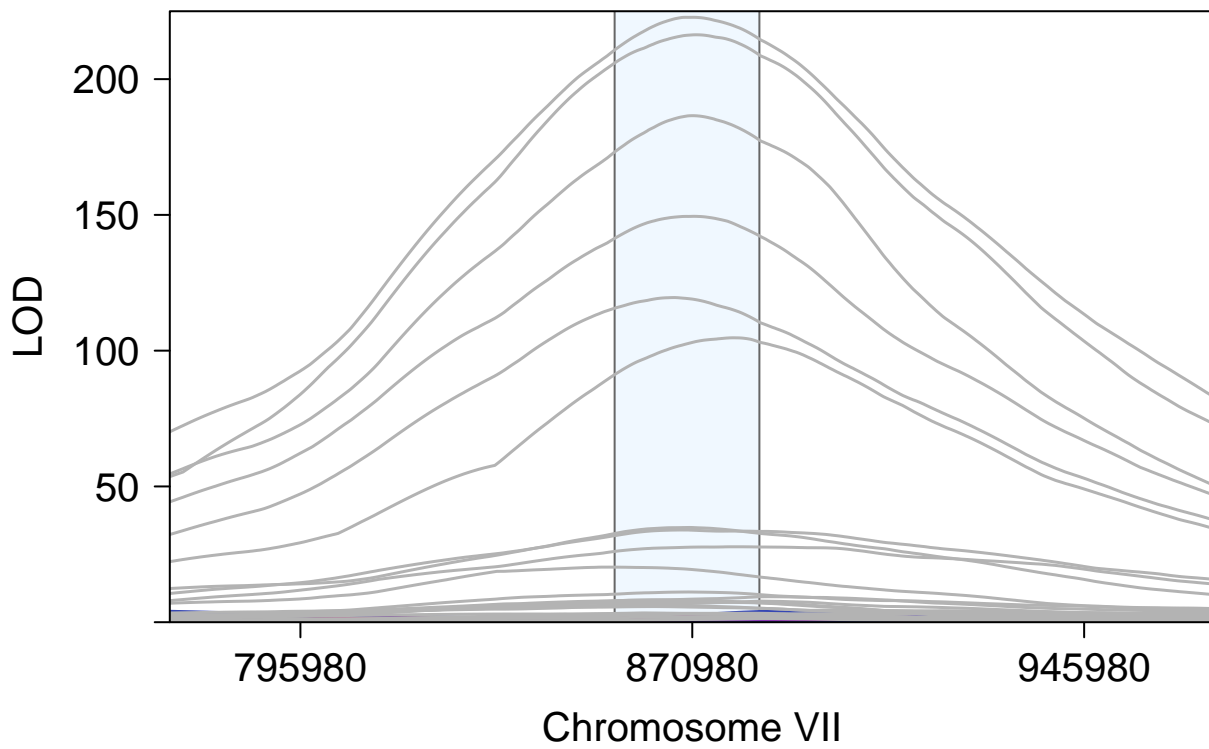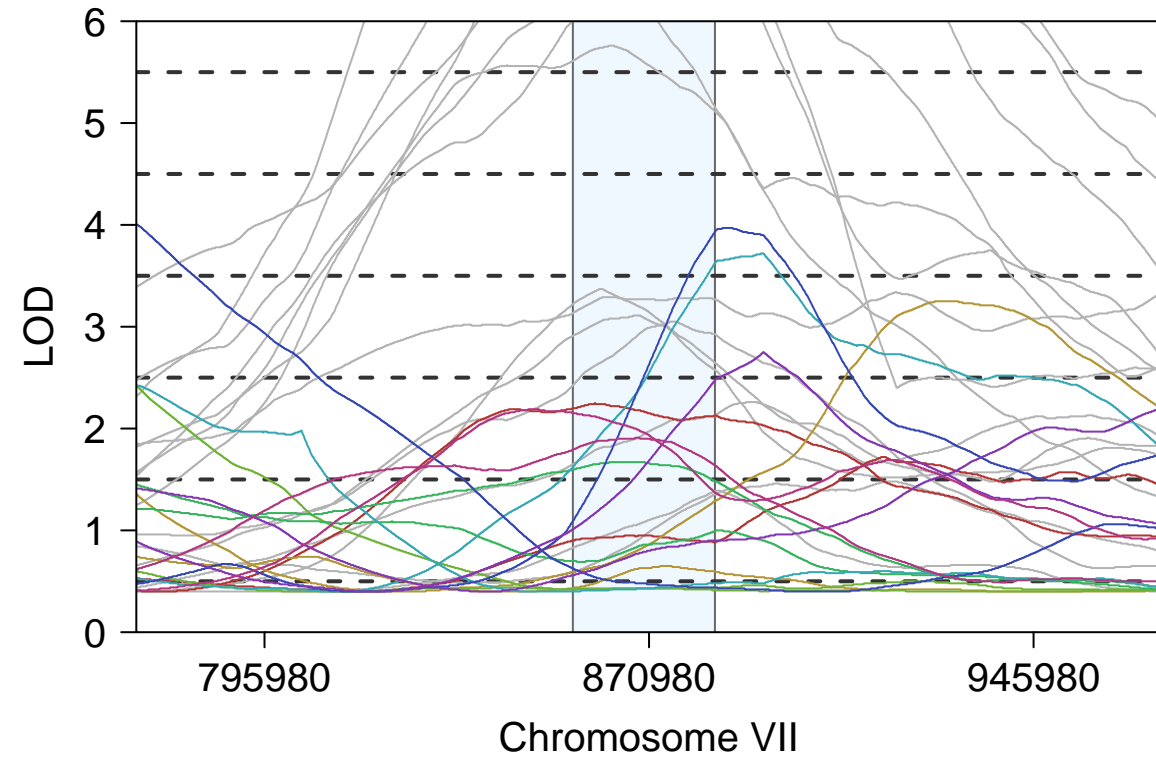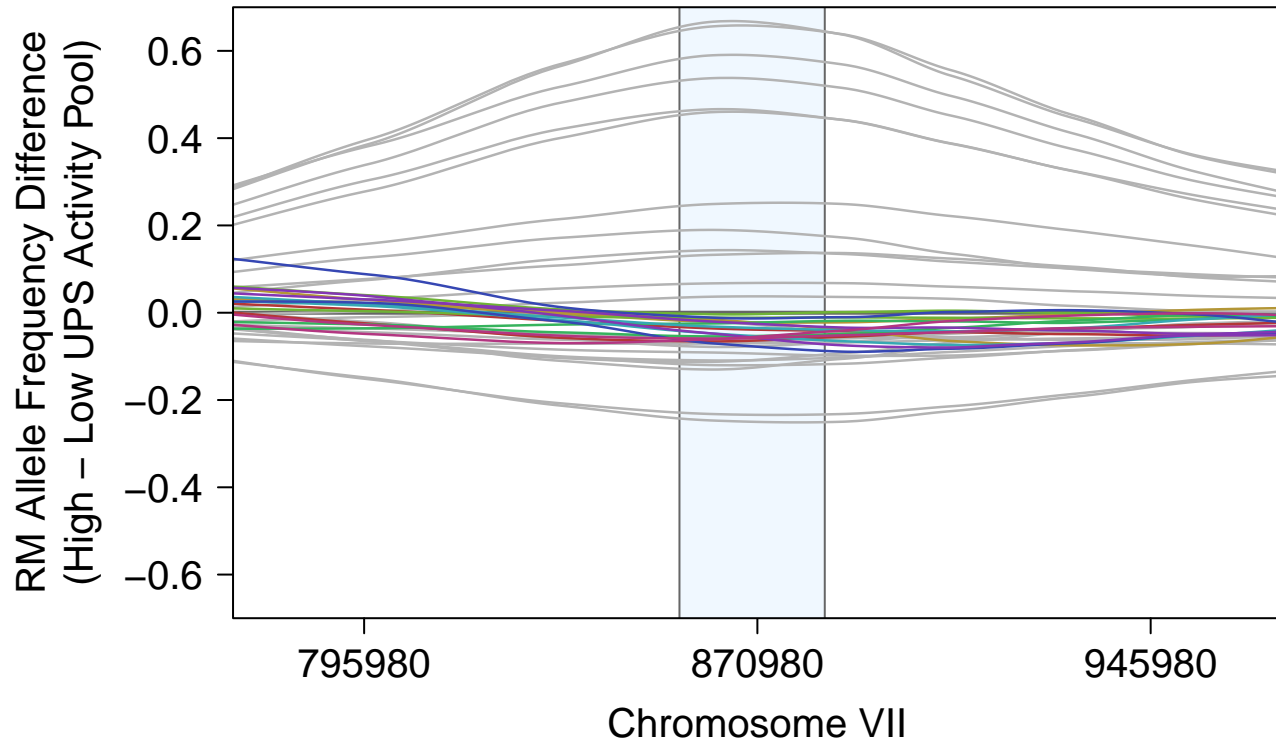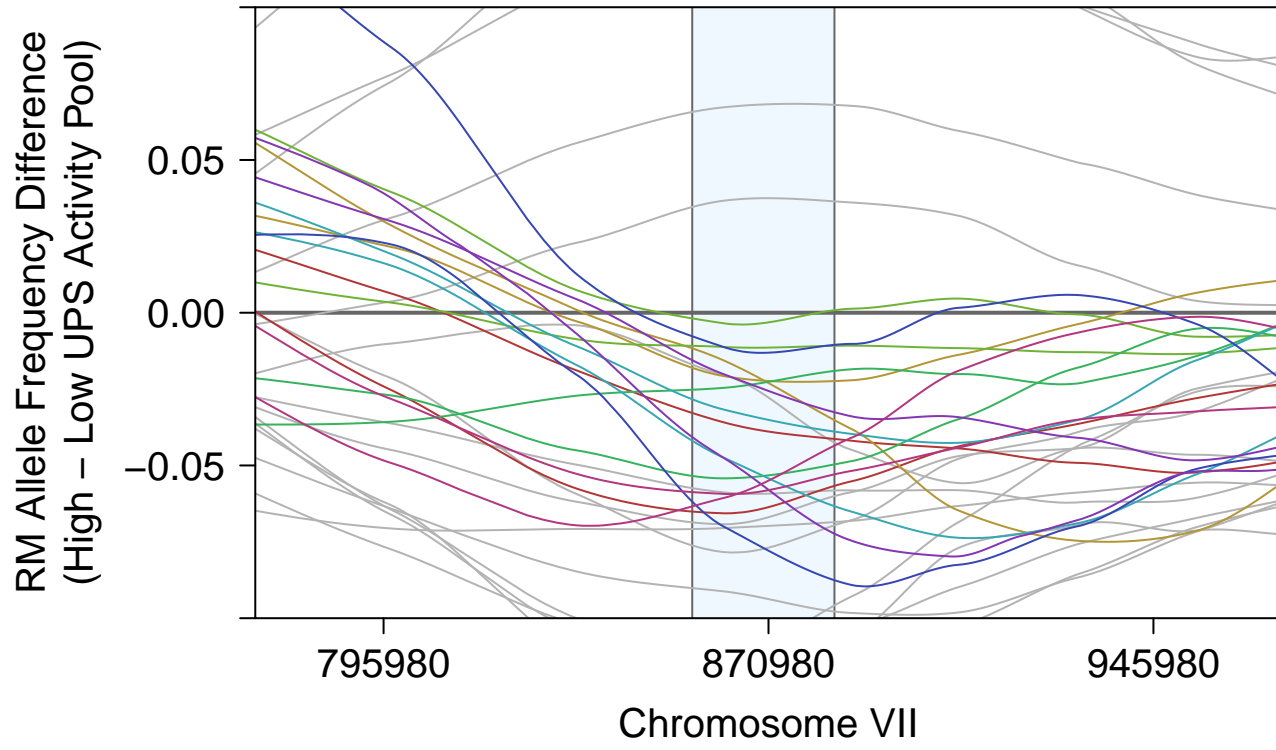



### Chromosome VIIIa 50150..127300 (Arg/N-end specific)

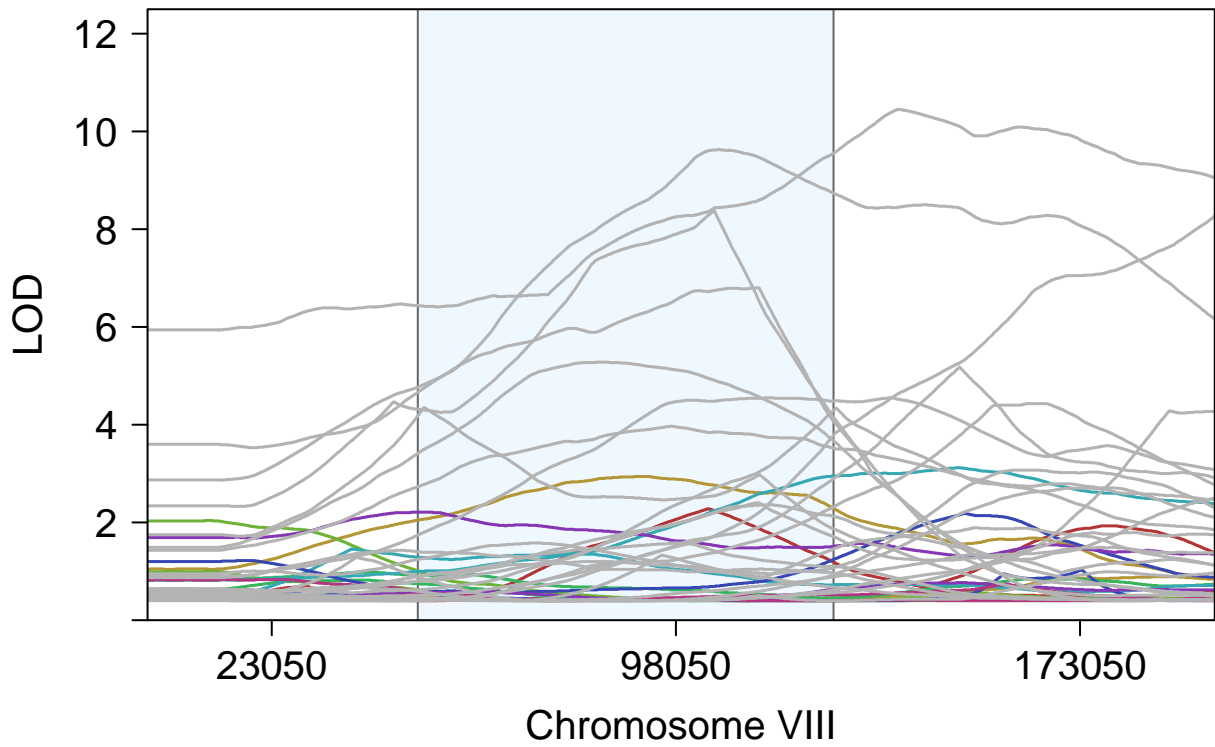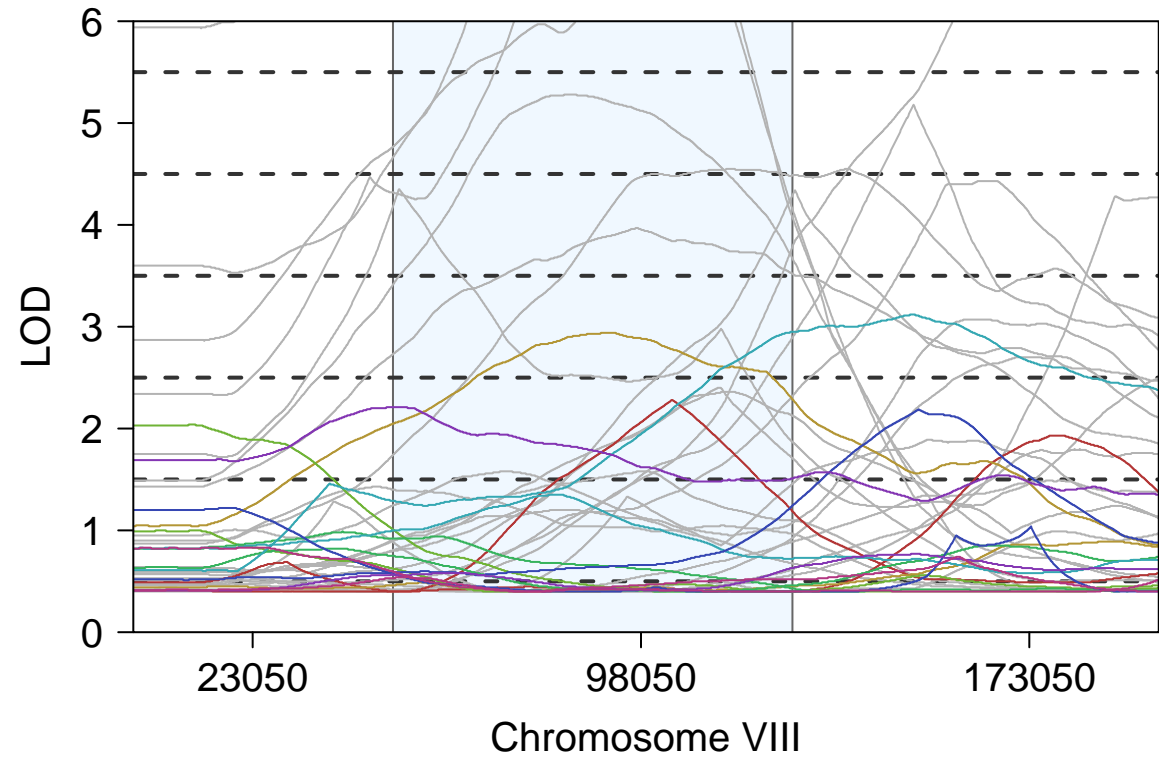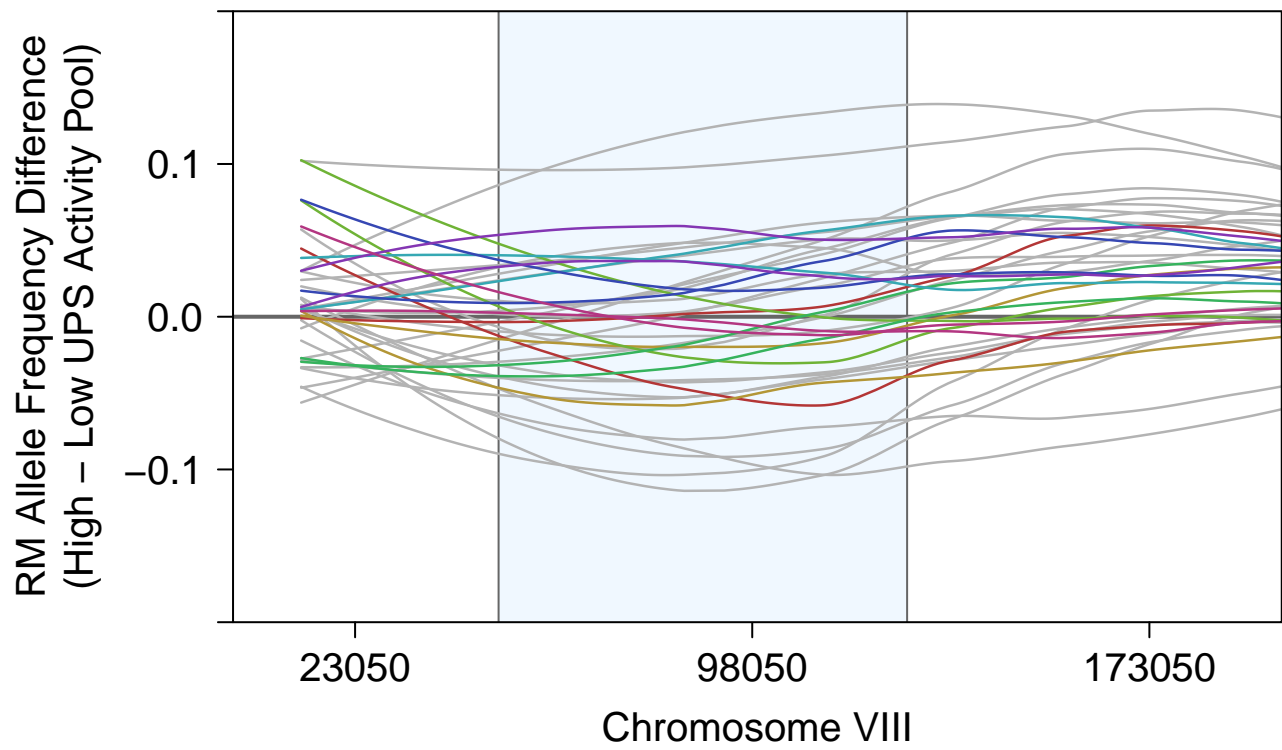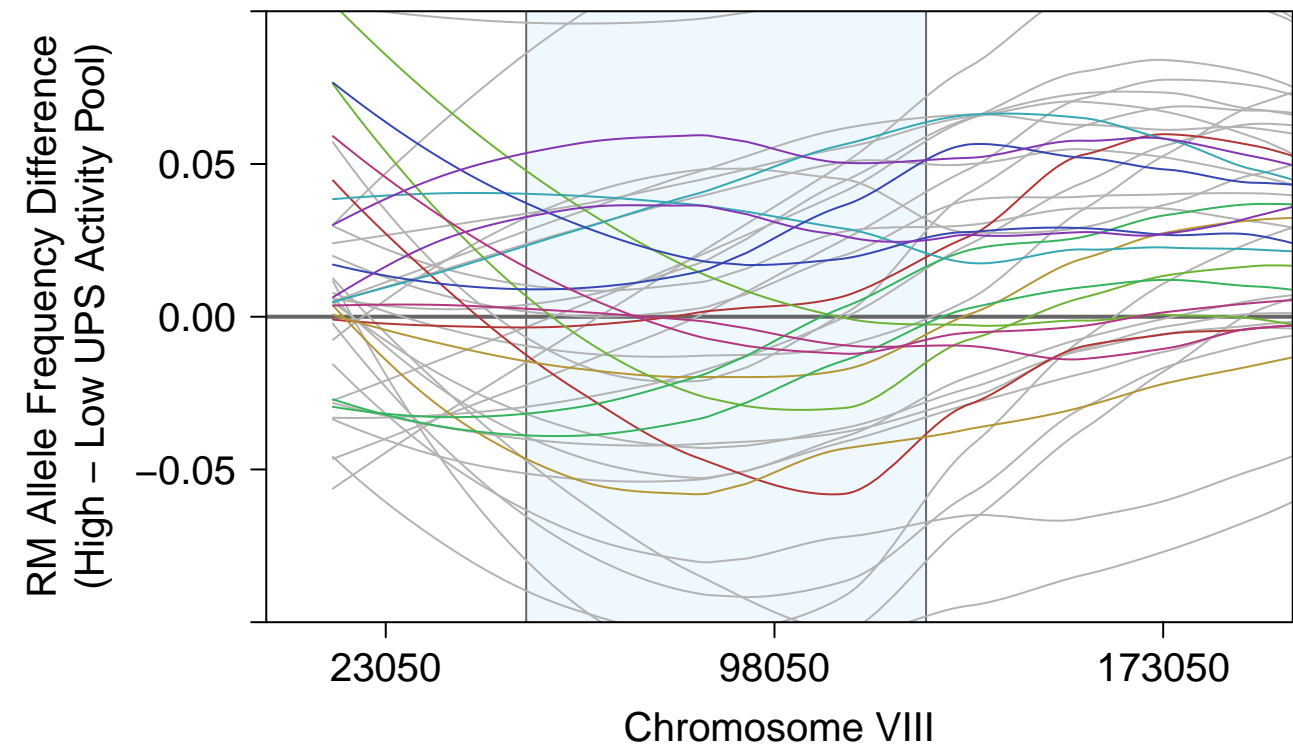

### Chromosome VIIIb 118875..193675 (Arg/N-end specific)

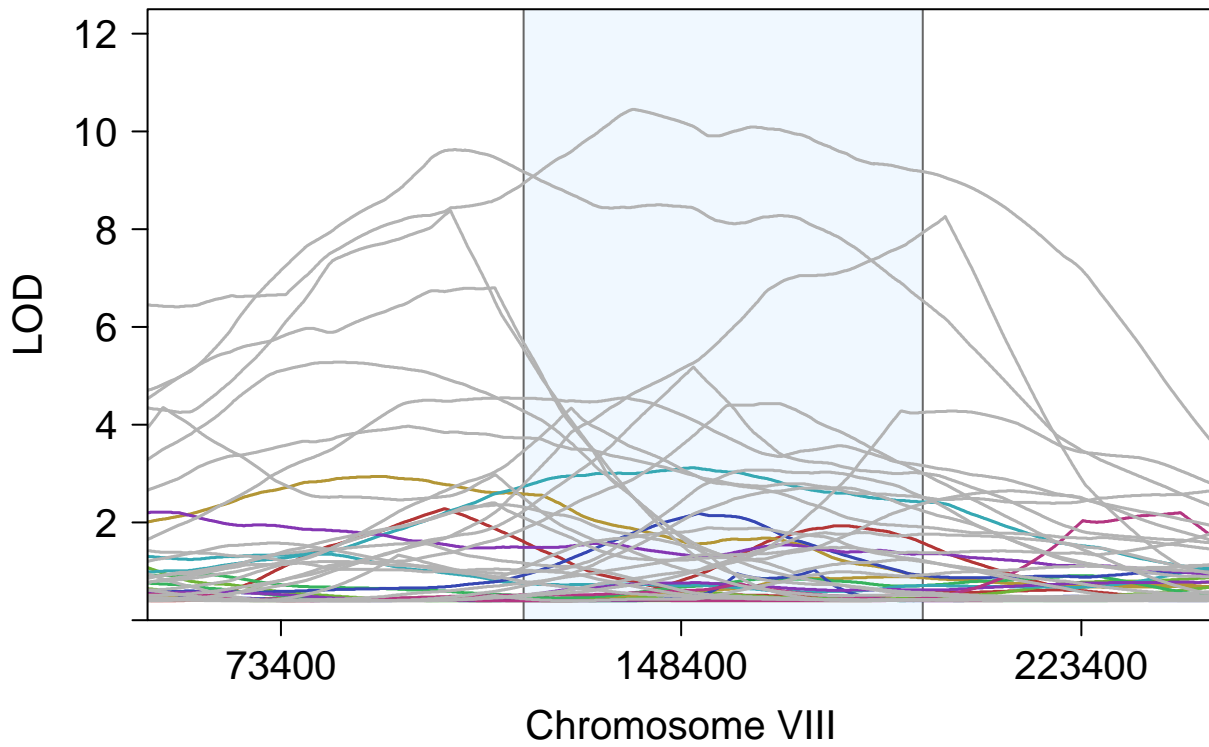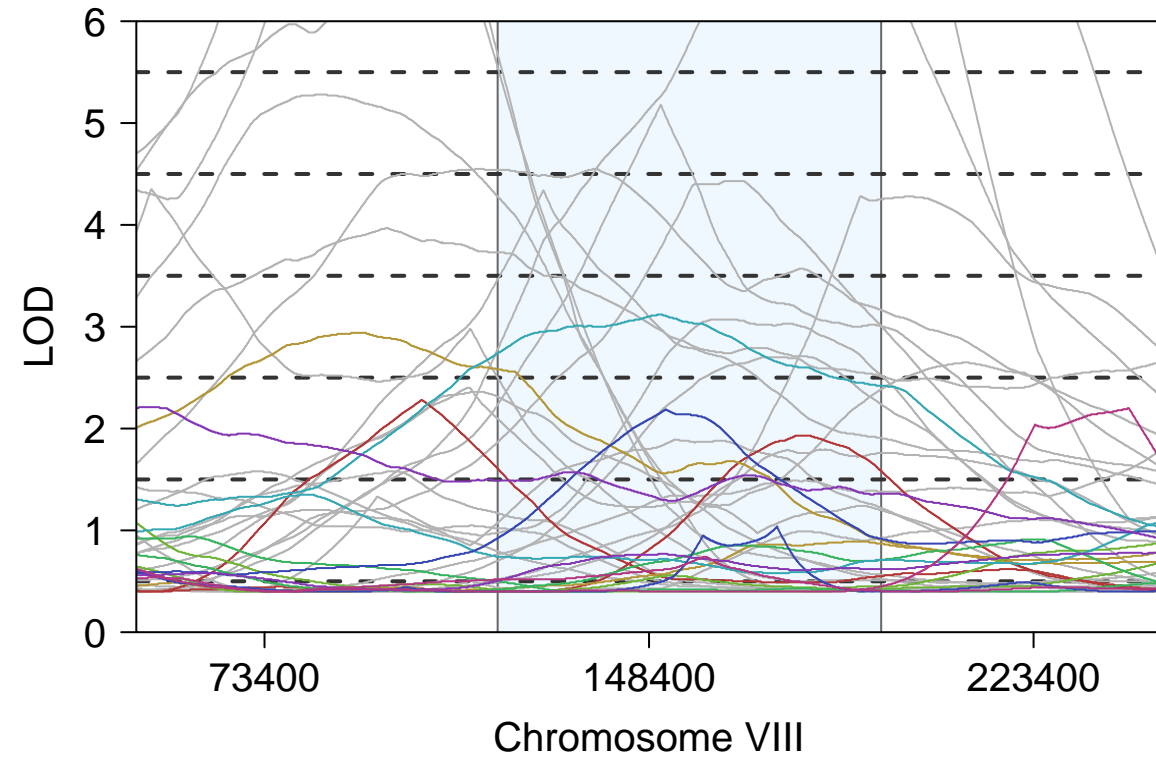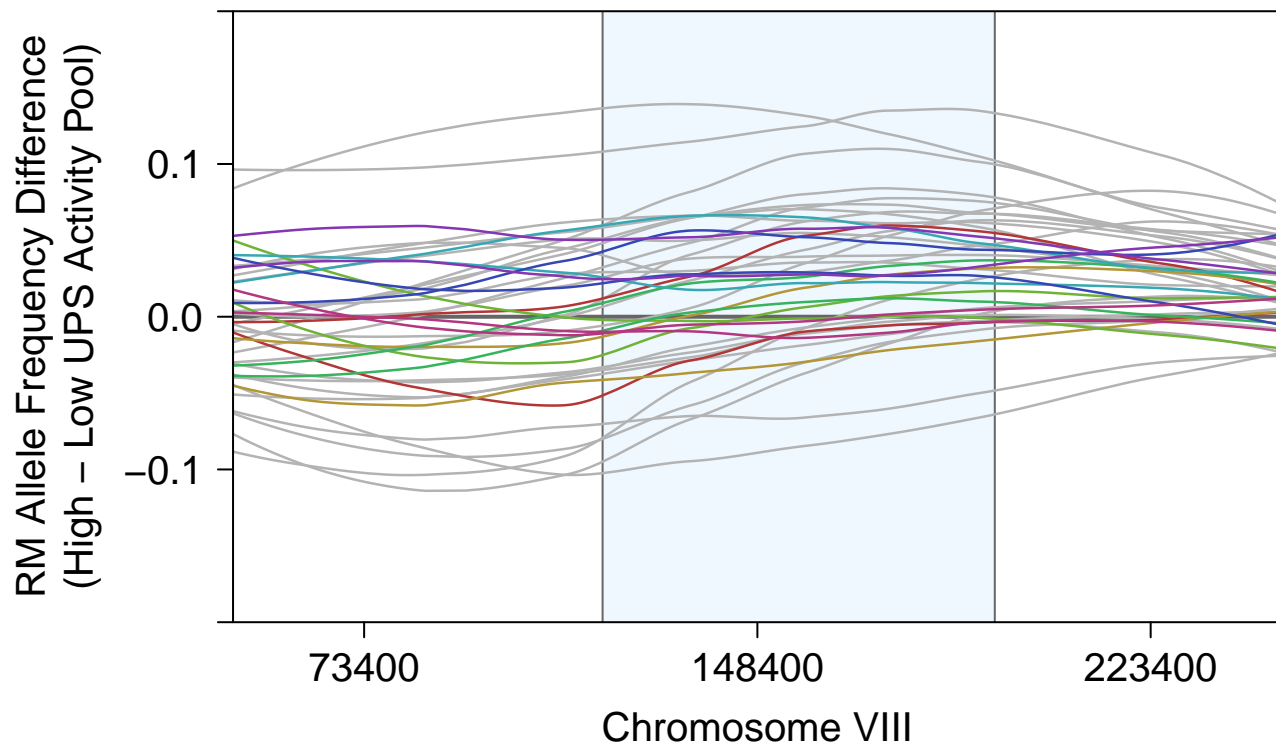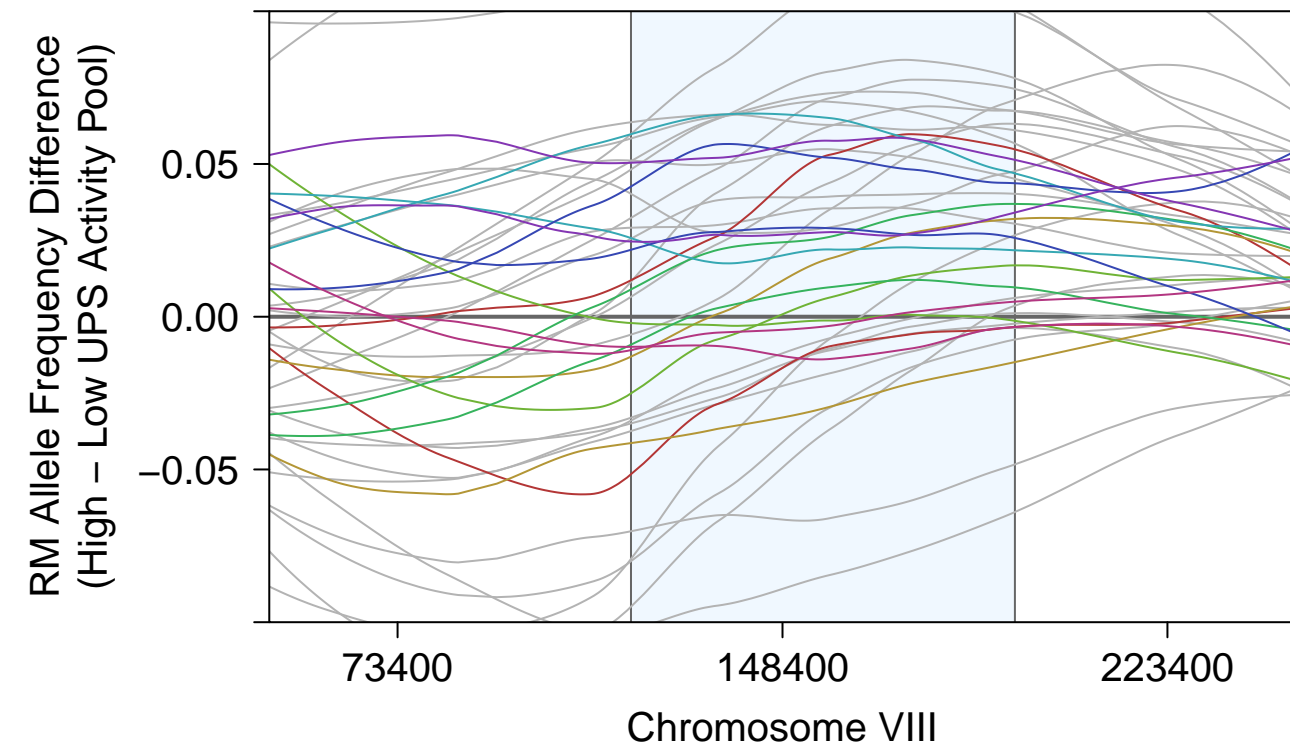

### Chromosome IXa 94550..168000 (Arg/N-end specific)

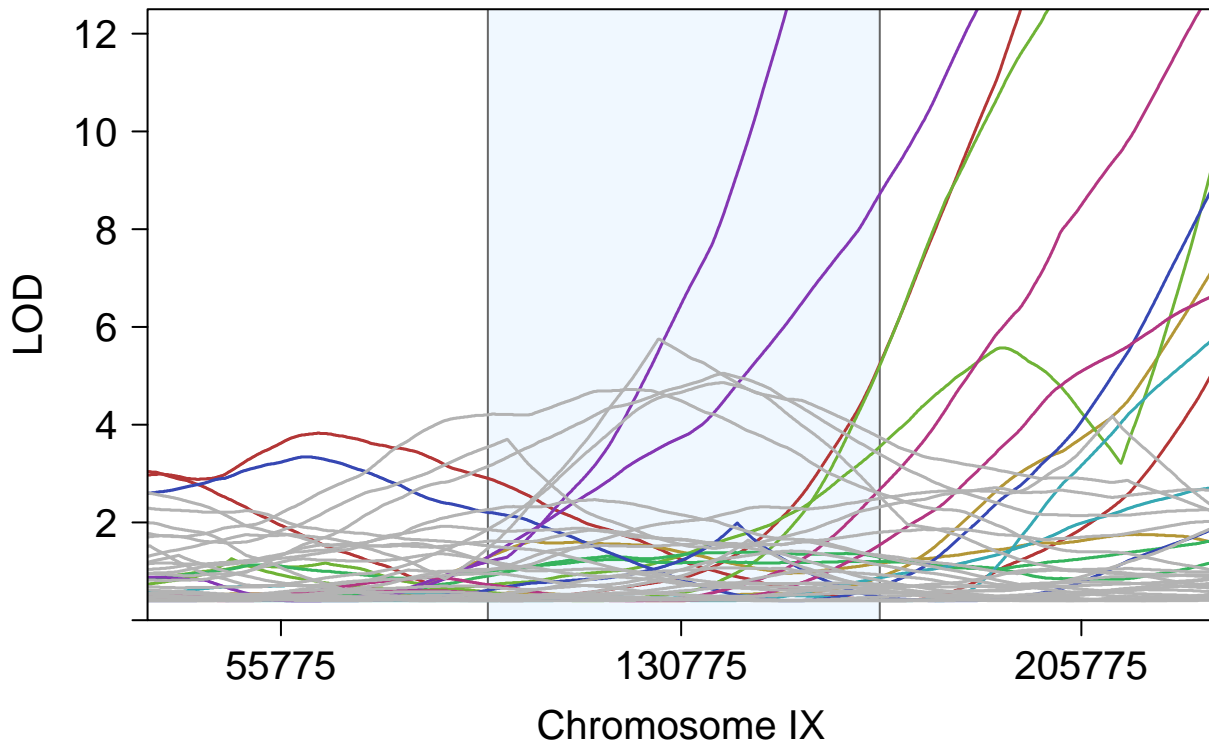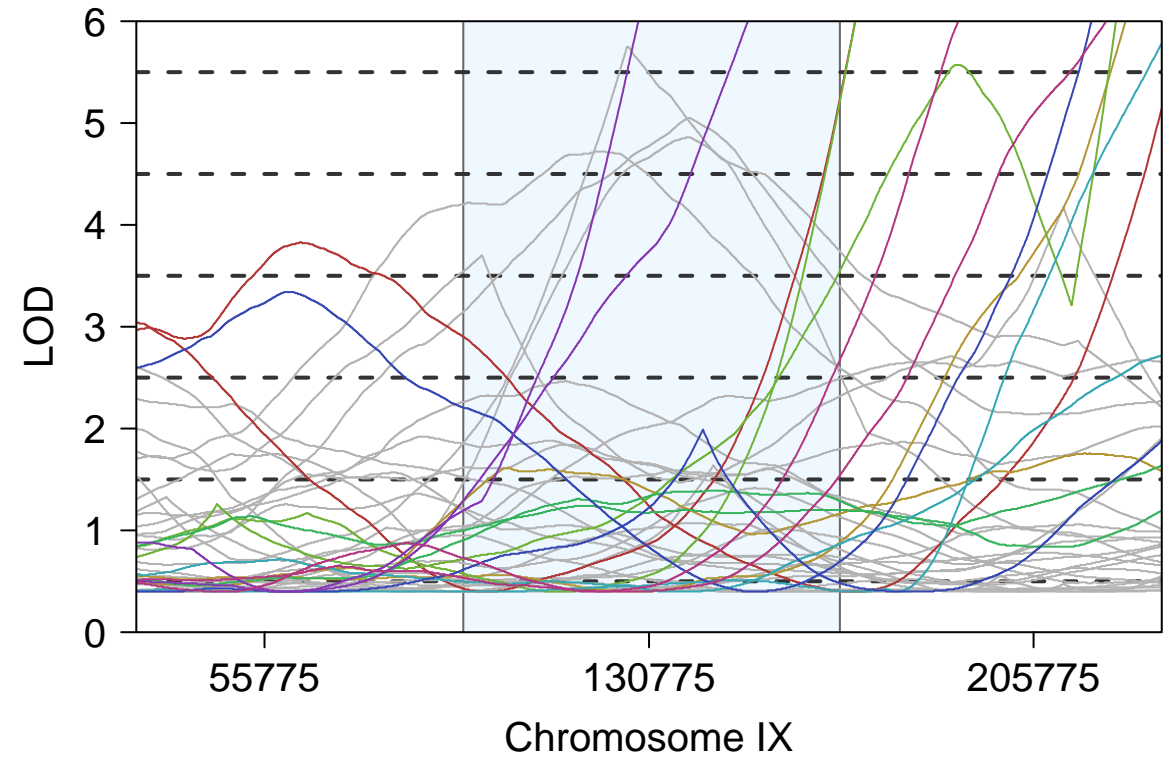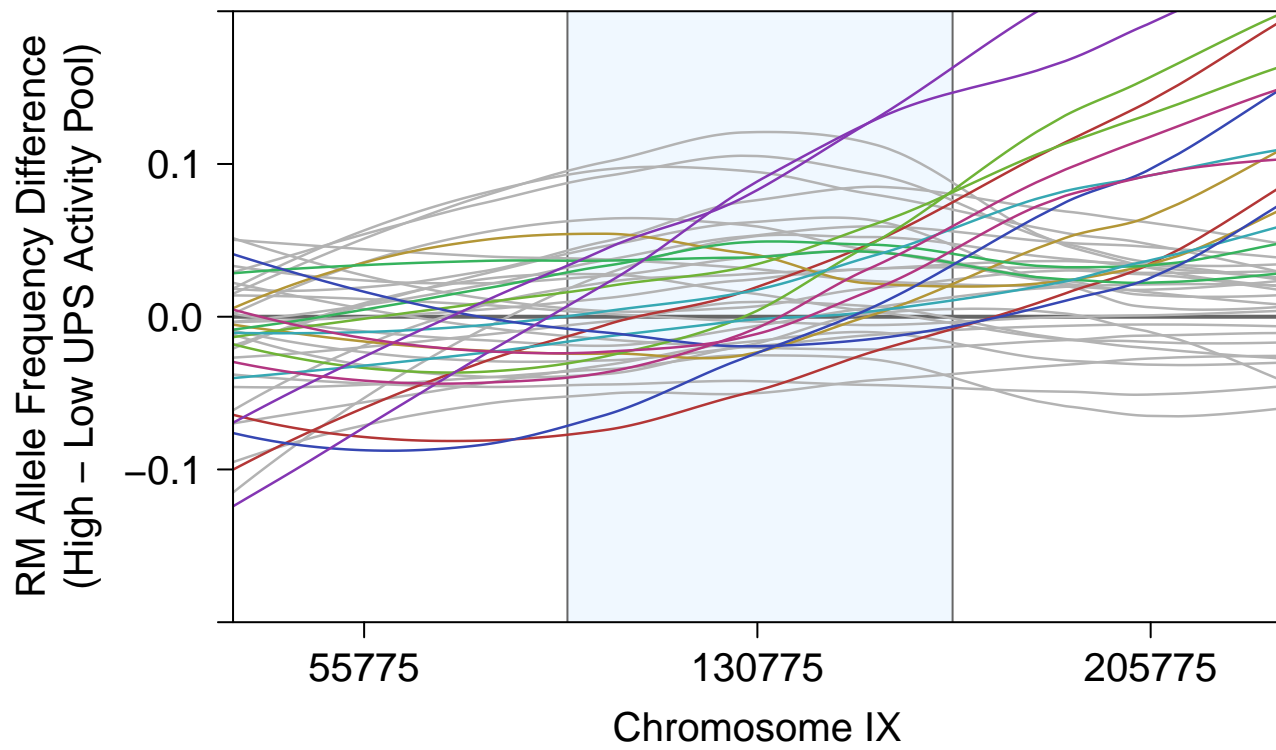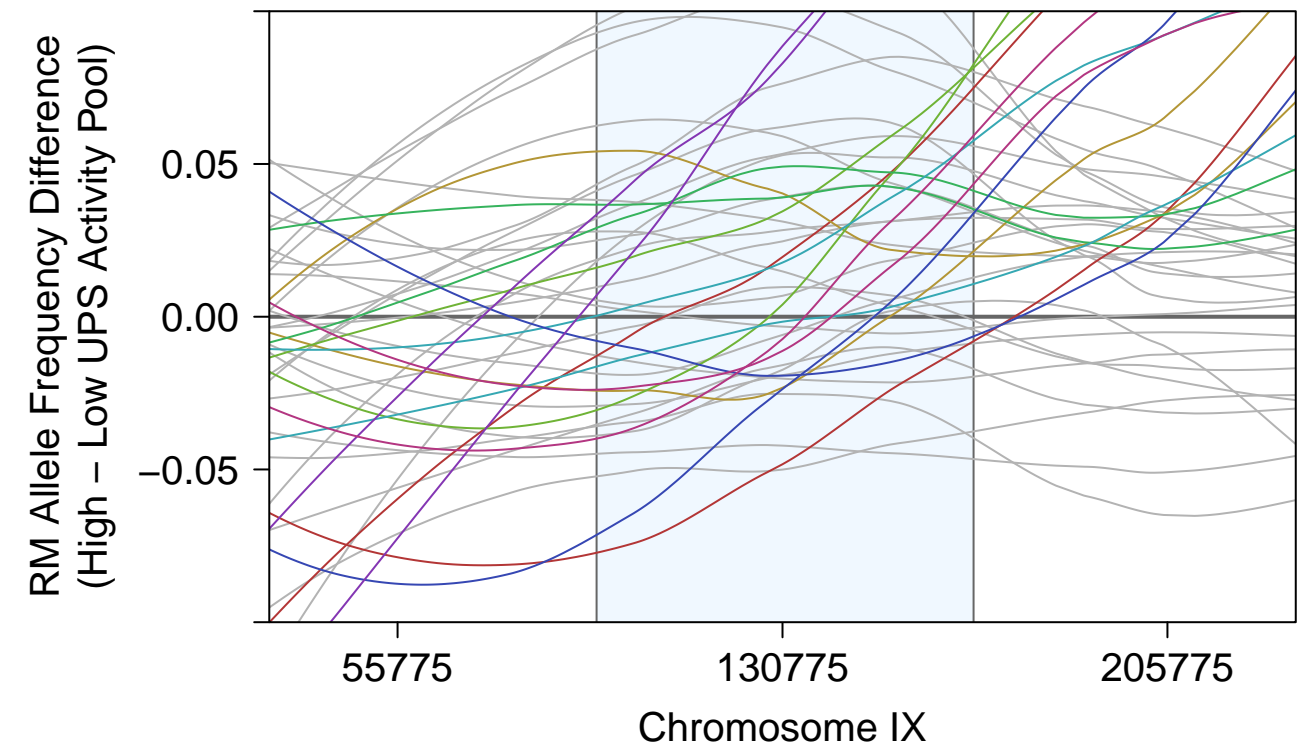

### Chromosome IXb 267641..315417 (Ac/N-end specific)

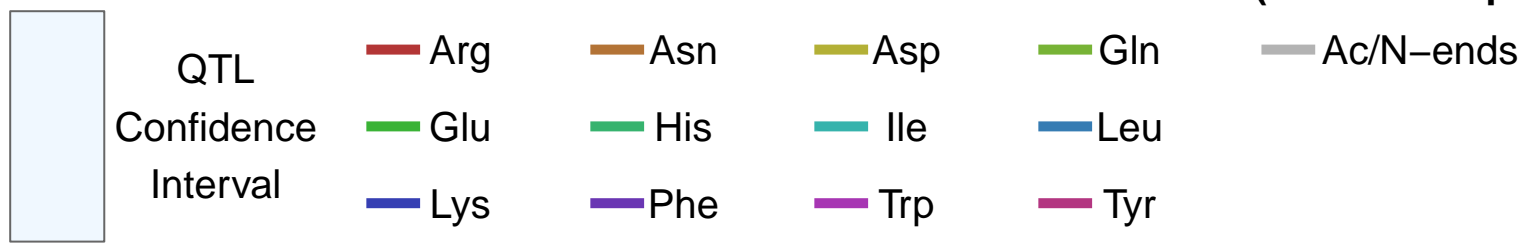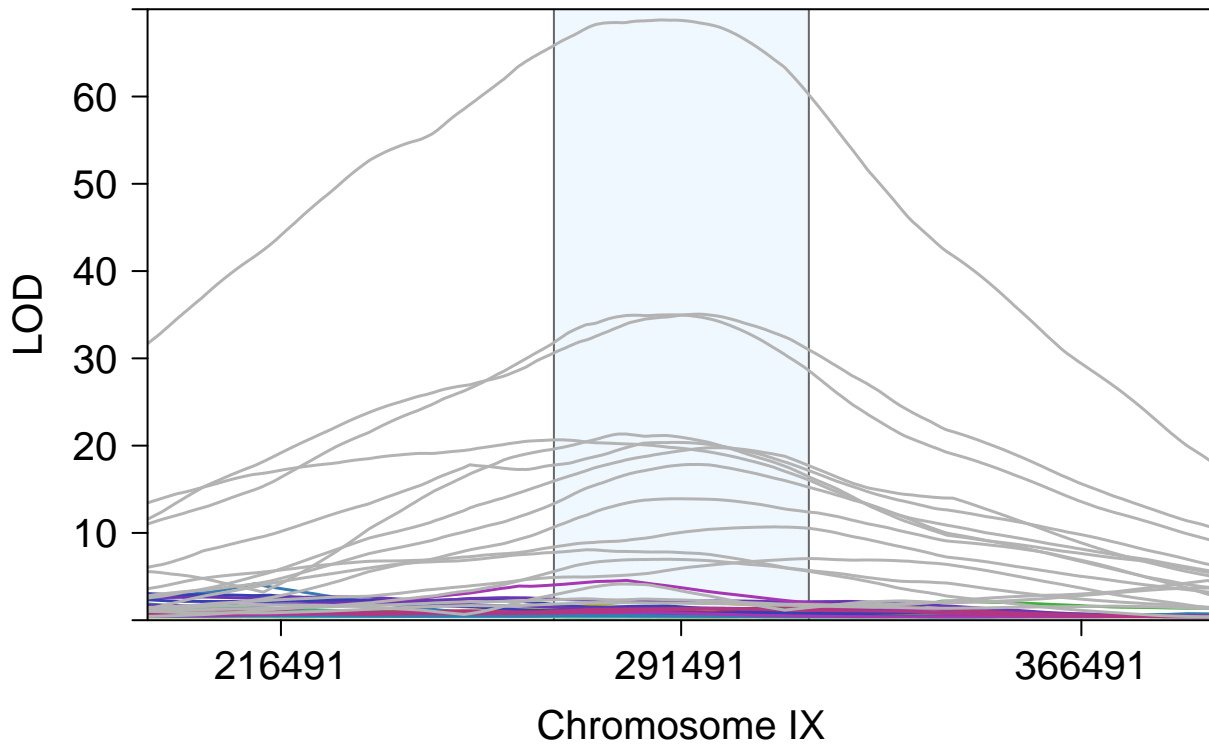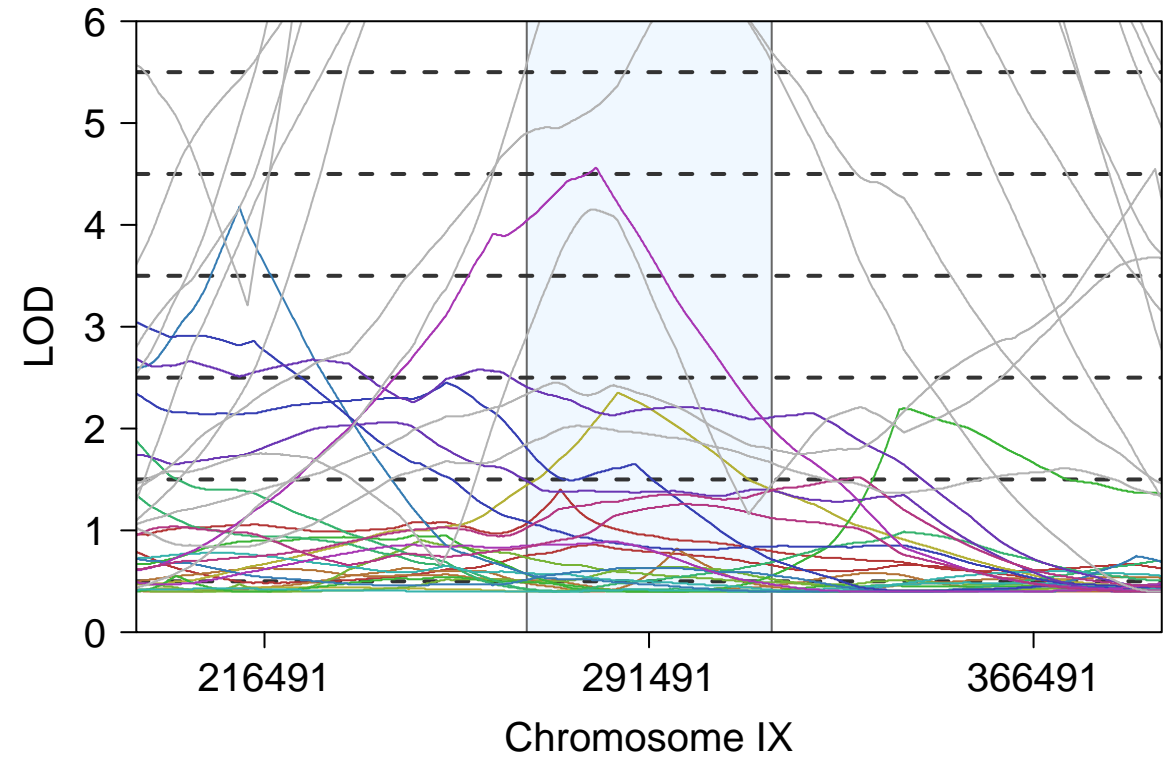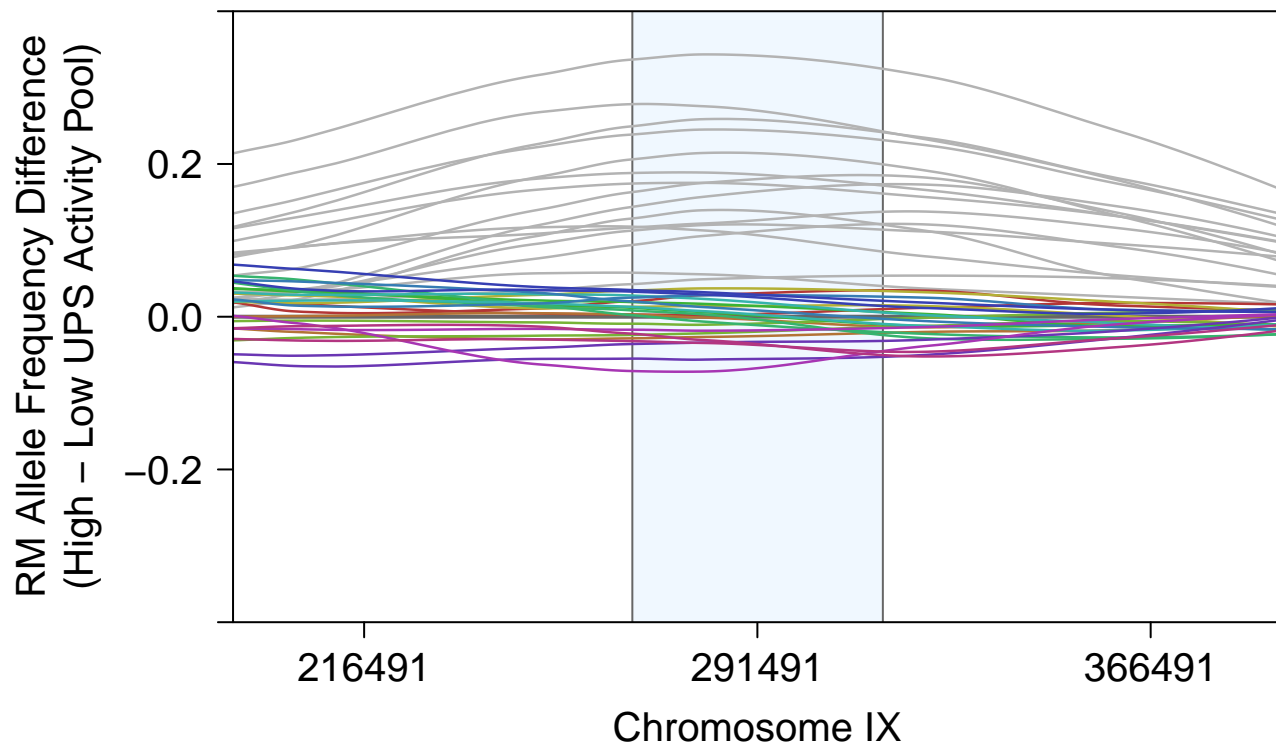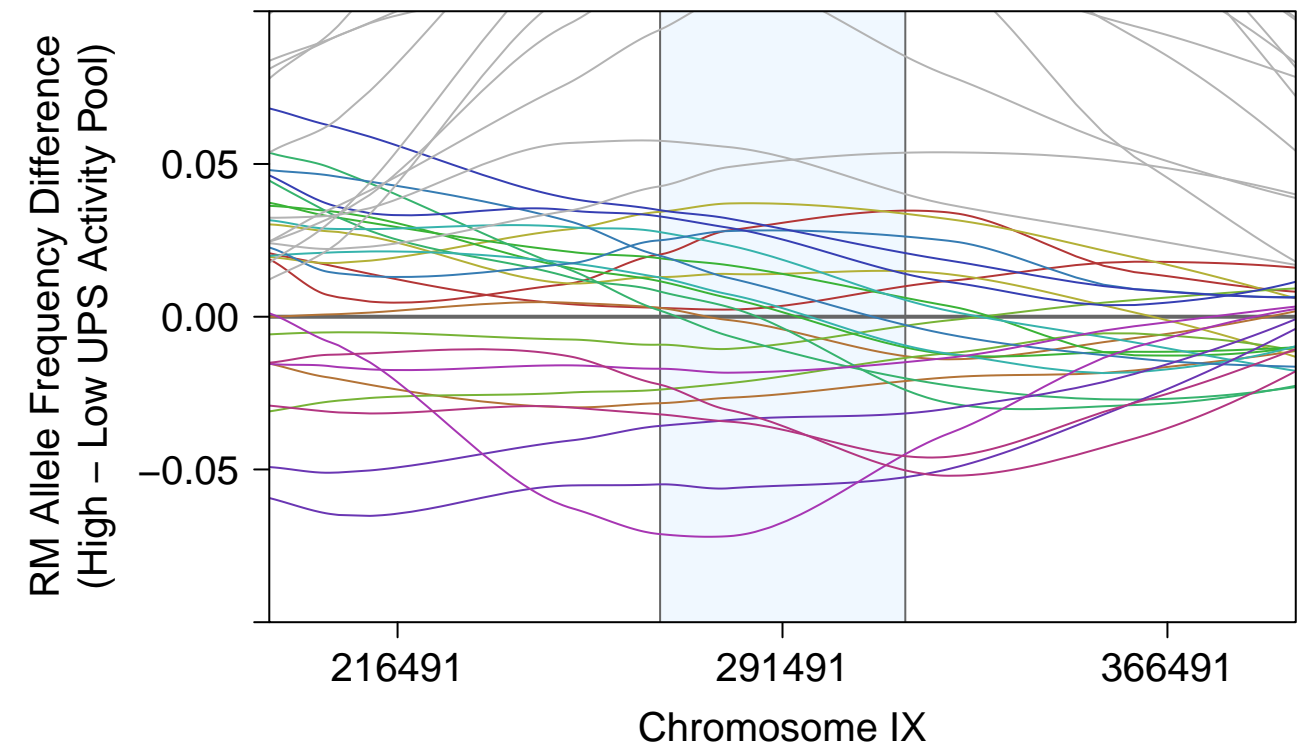

### Chromosome XIa 118750..173600 (Arg/N-end specific)

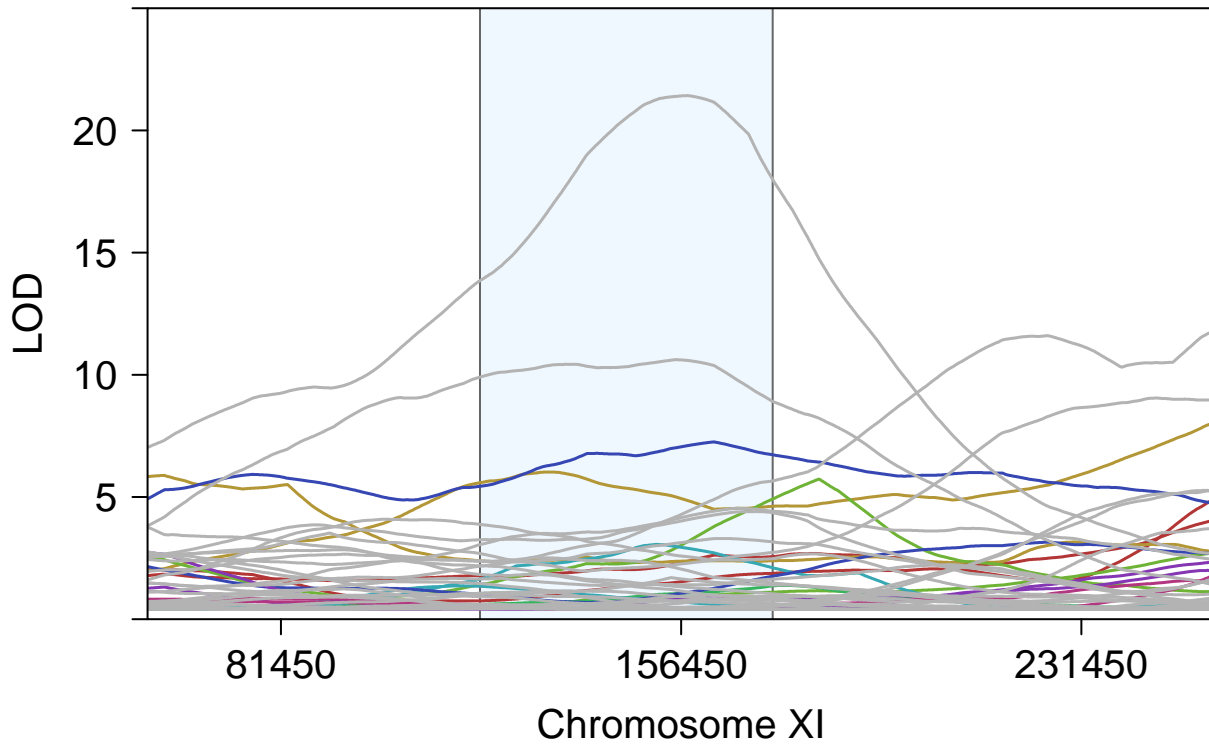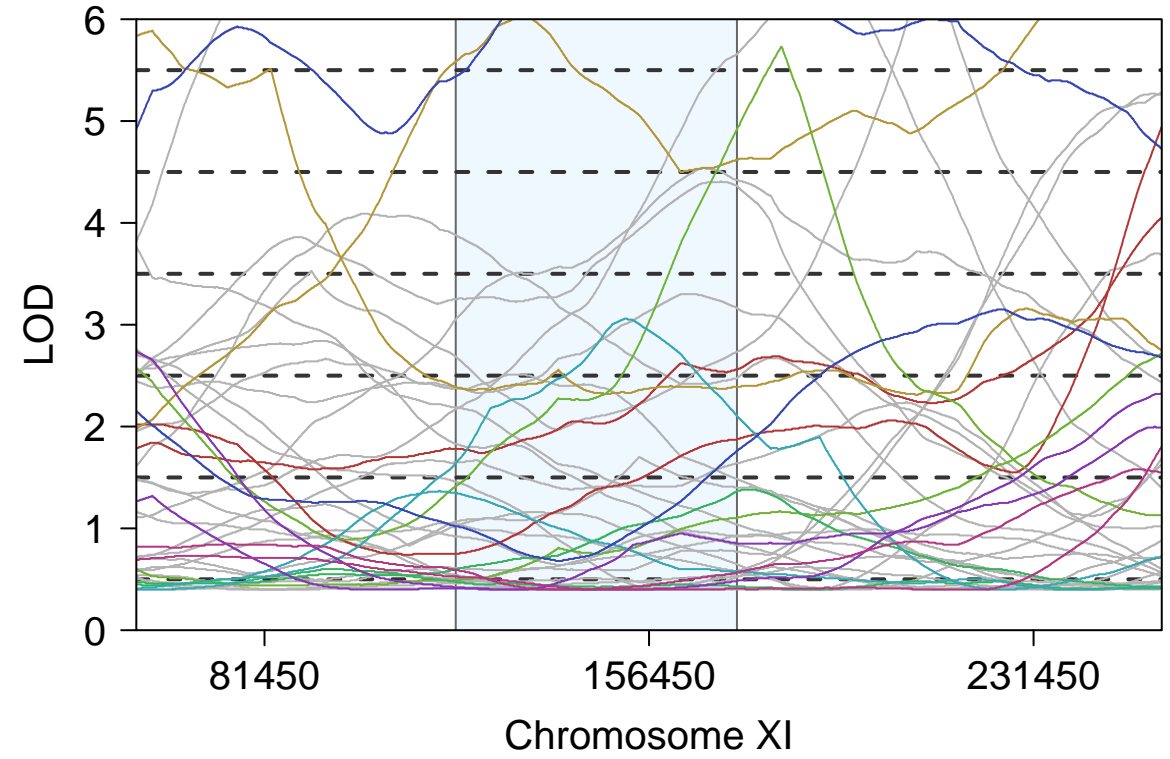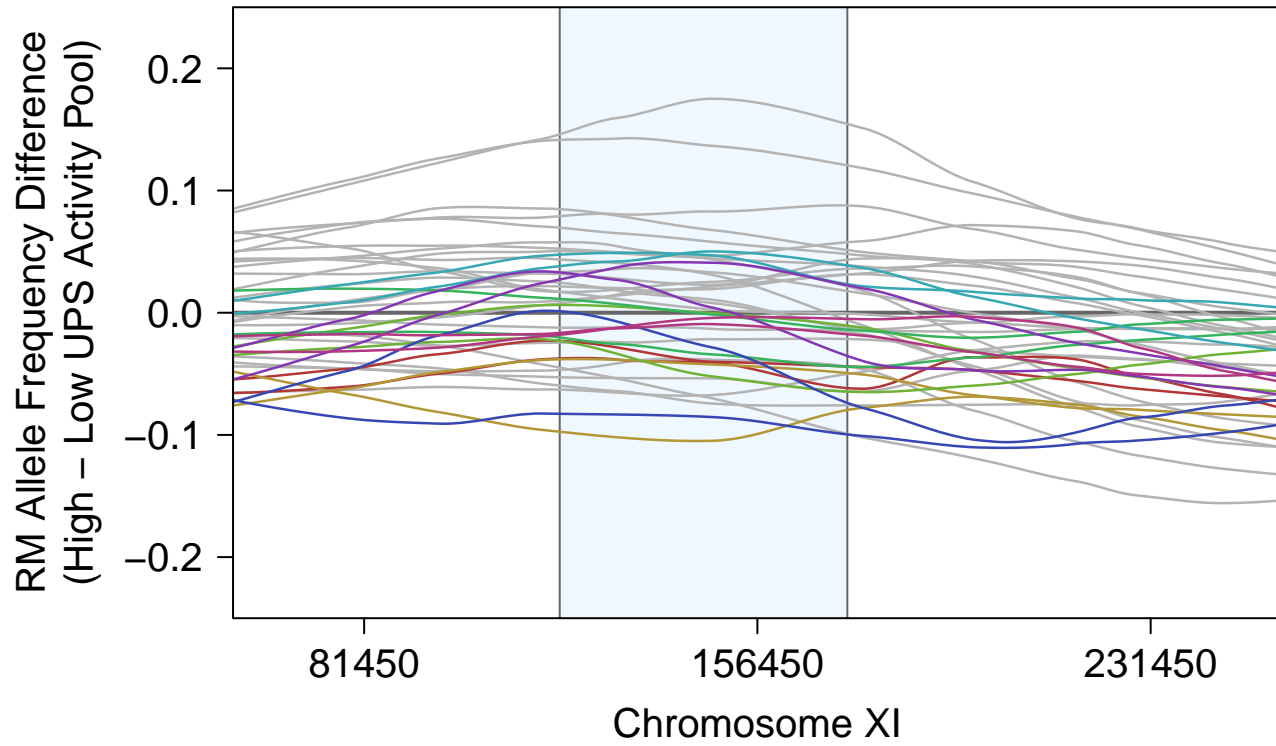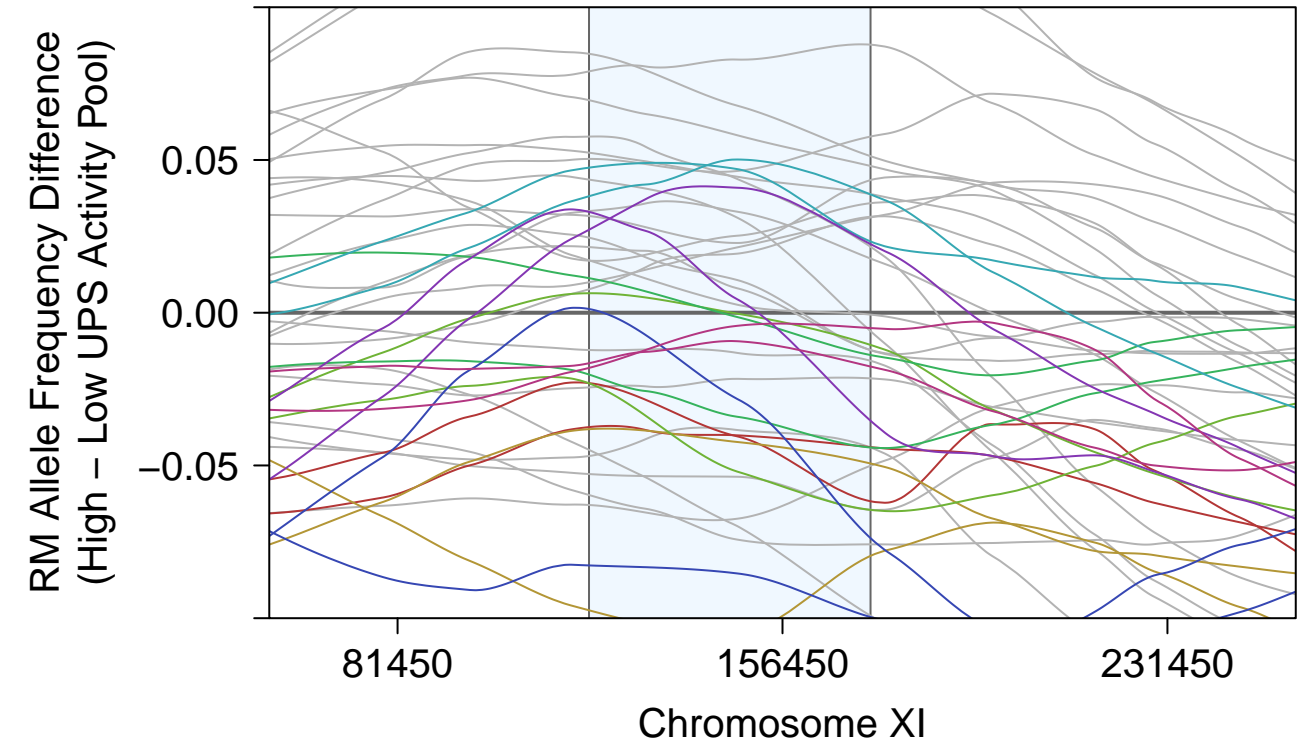

**Chromosome XIIa 157200..226850 (Ac/N-end specific)**

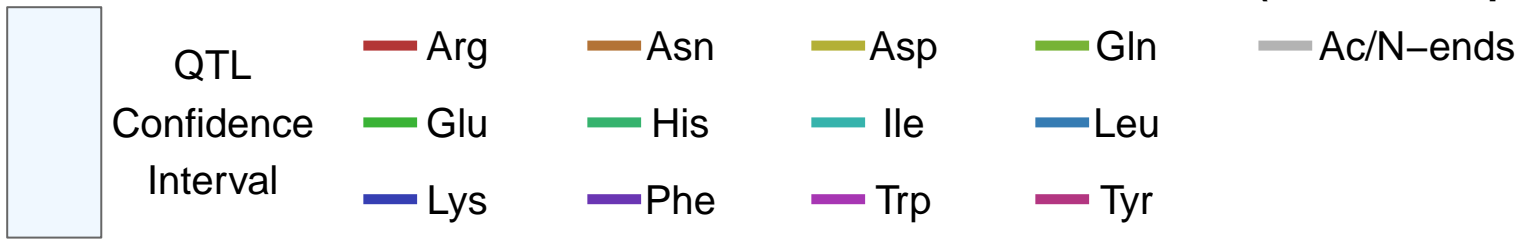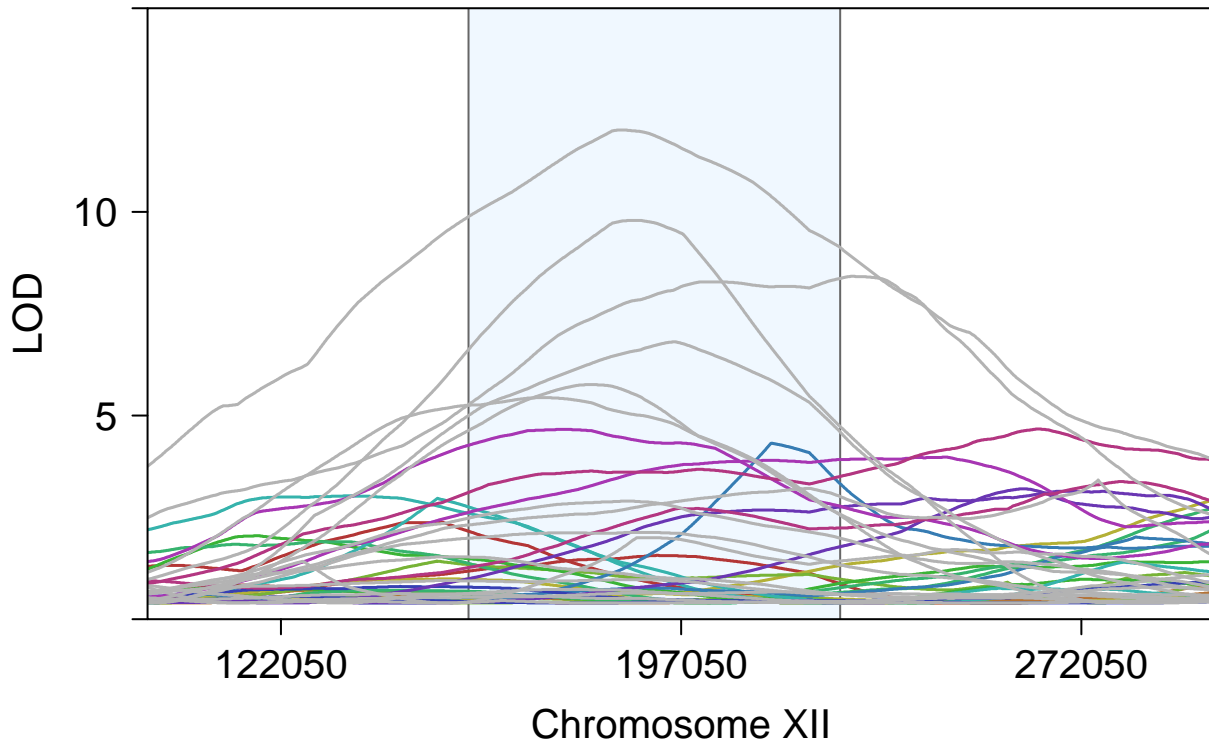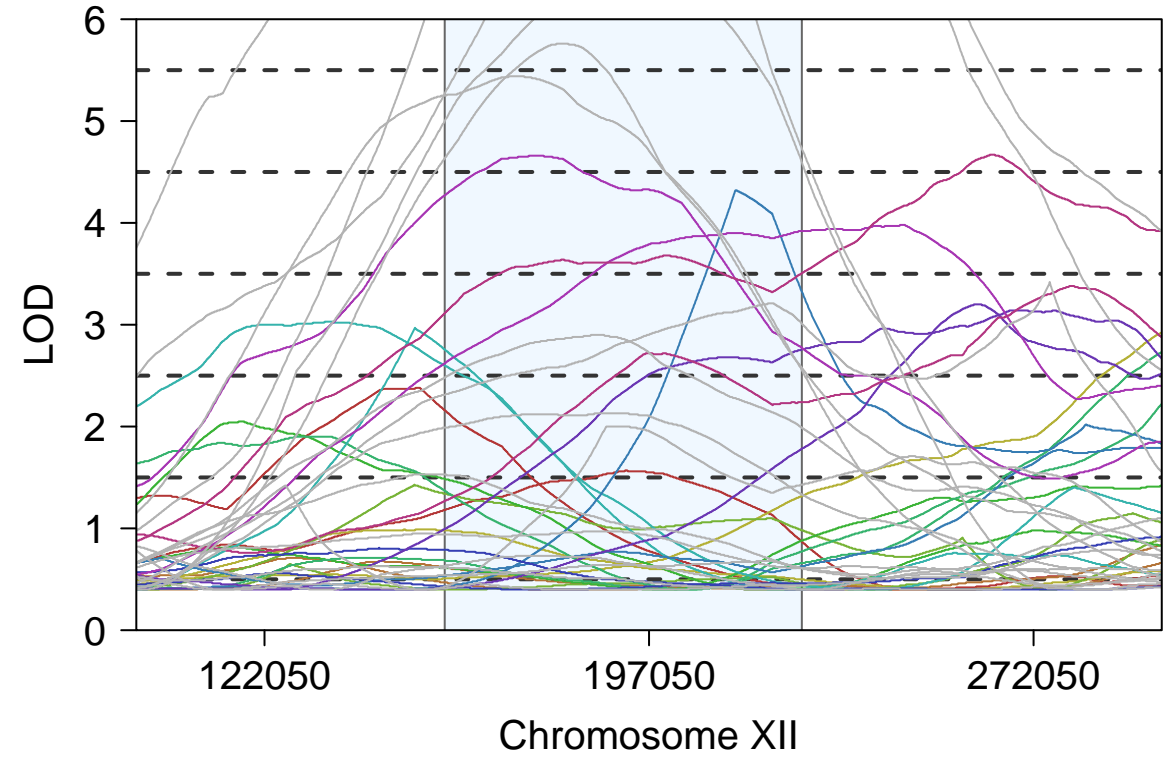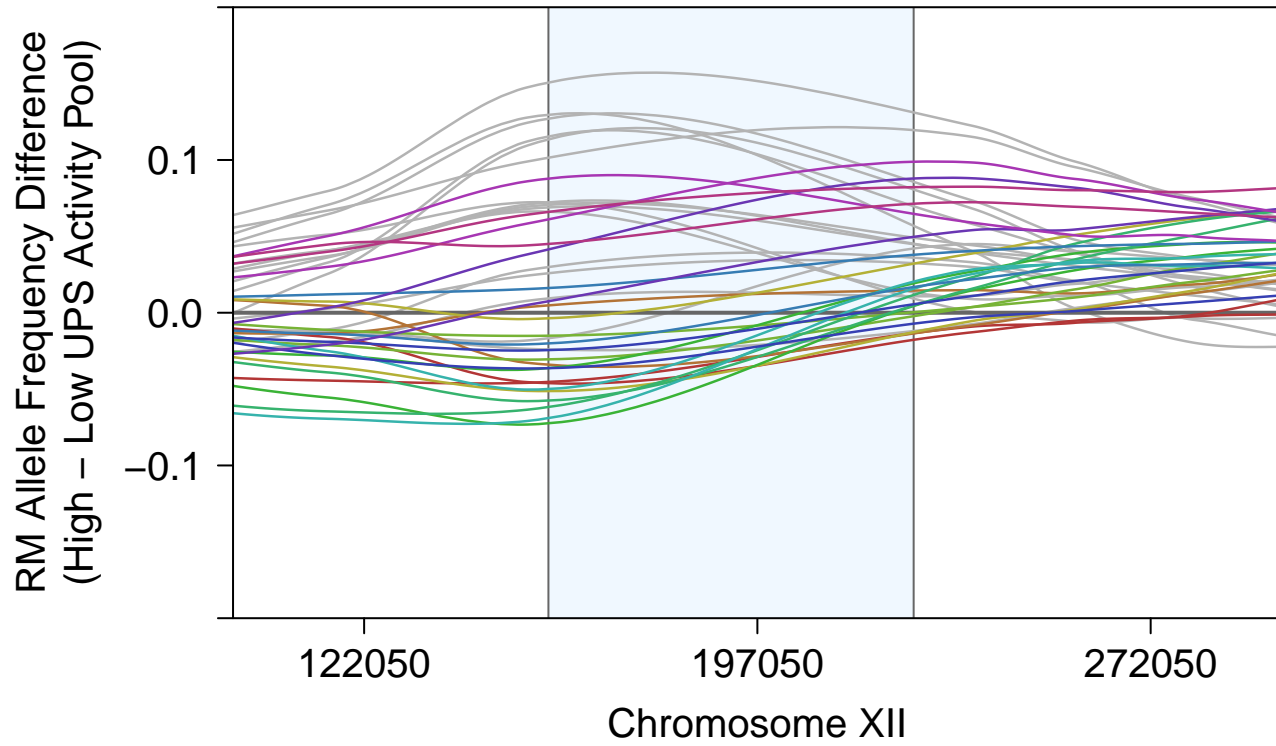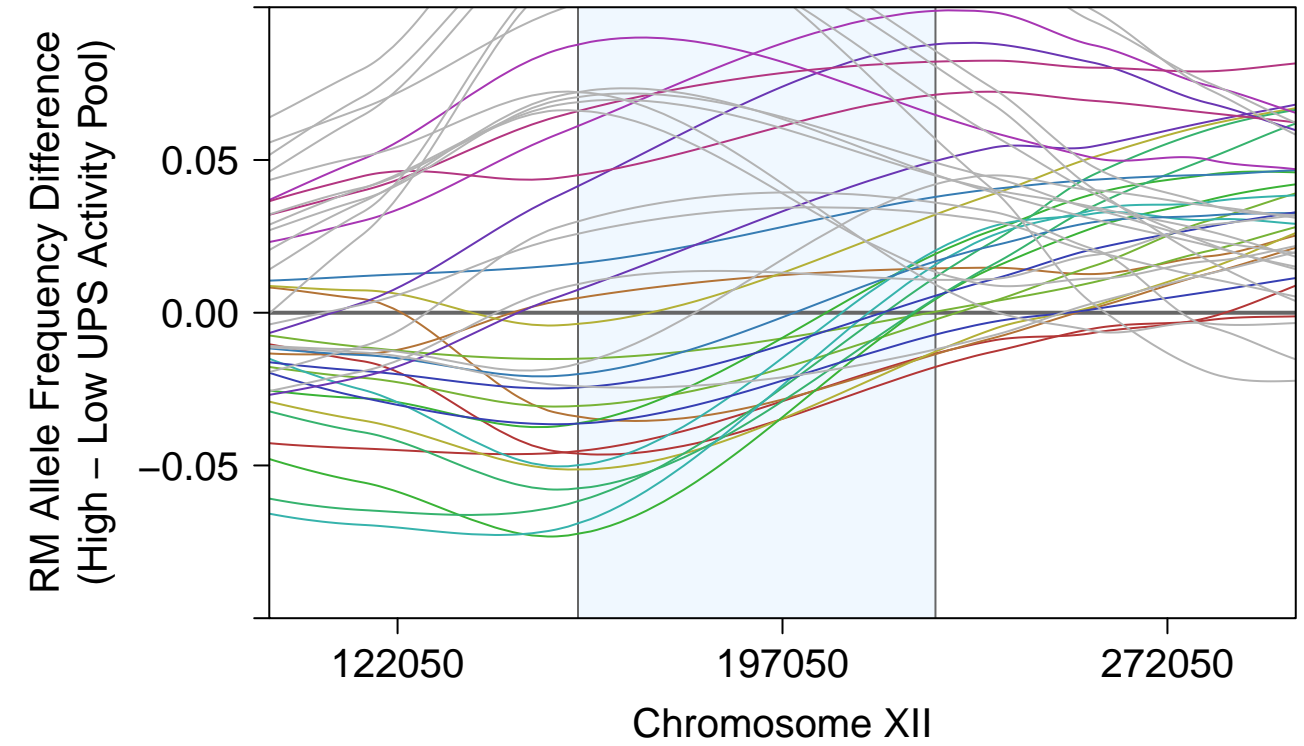

### Chromosome XIIc 639637..702650 (Arg/N-end specific)

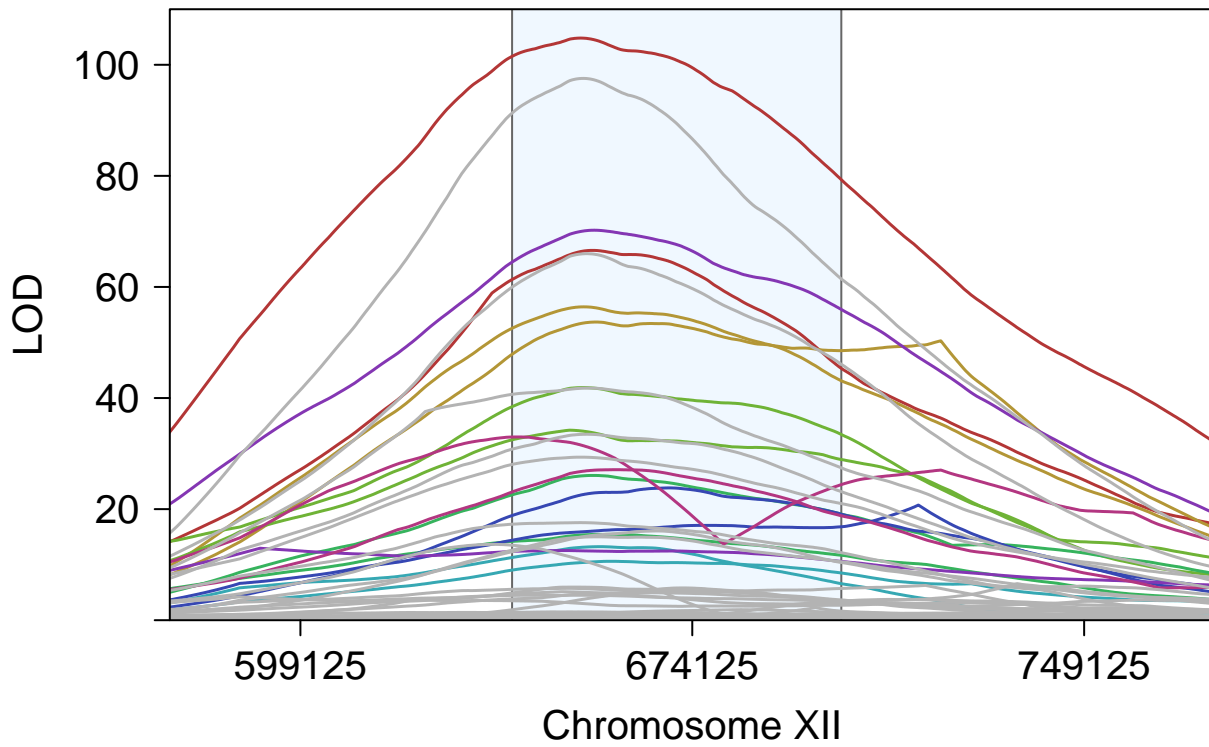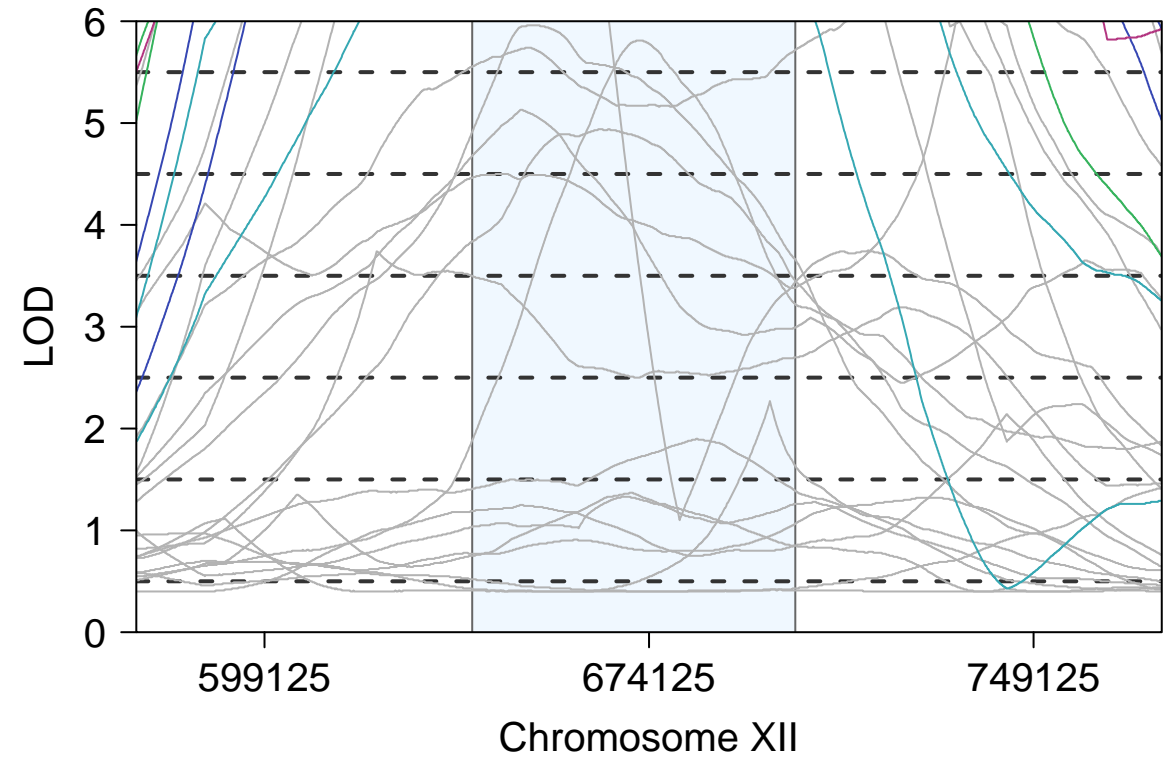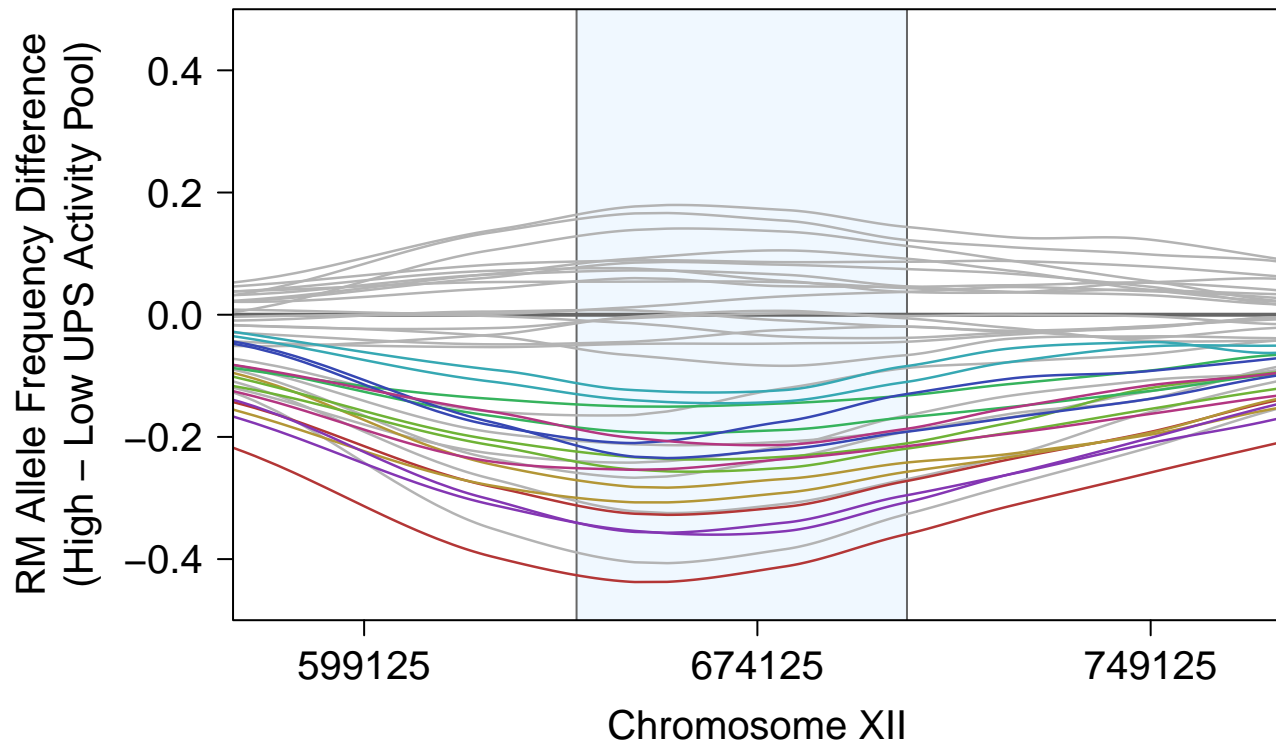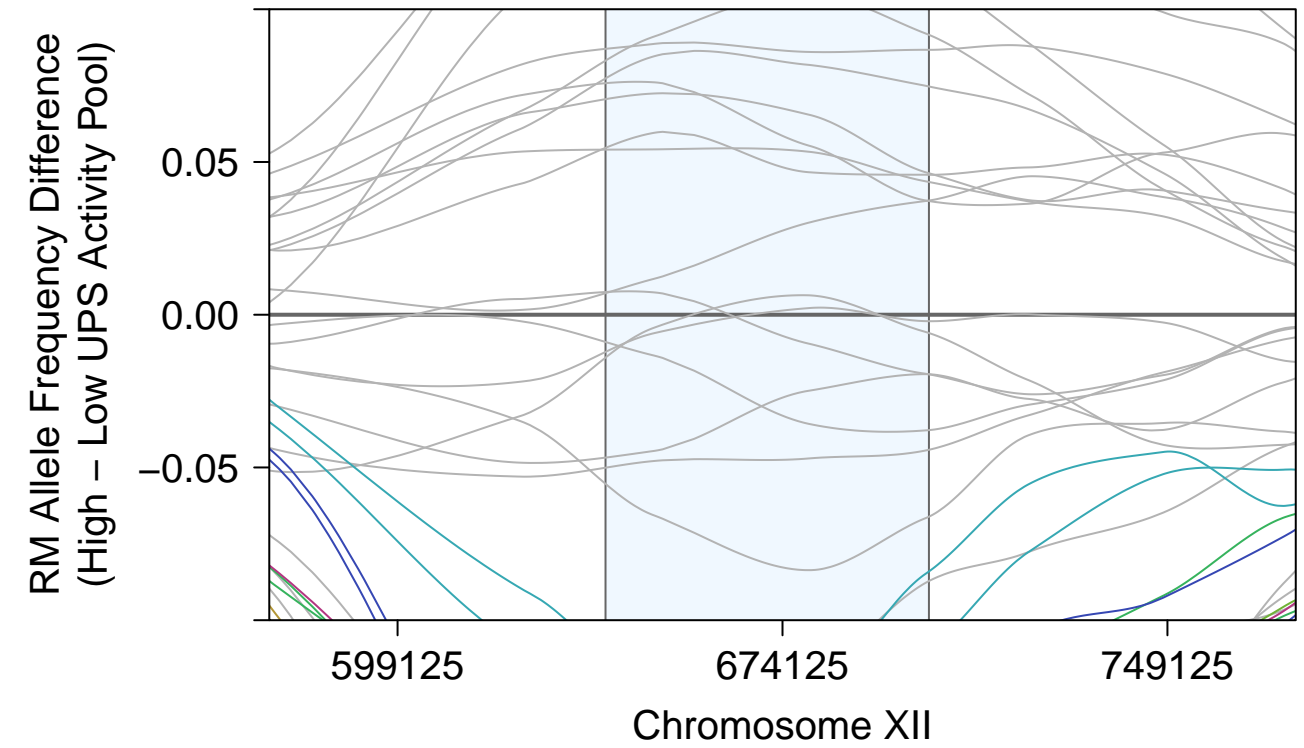

### Chromosome XIIIa 0..58950 (Ac/N-end specific)

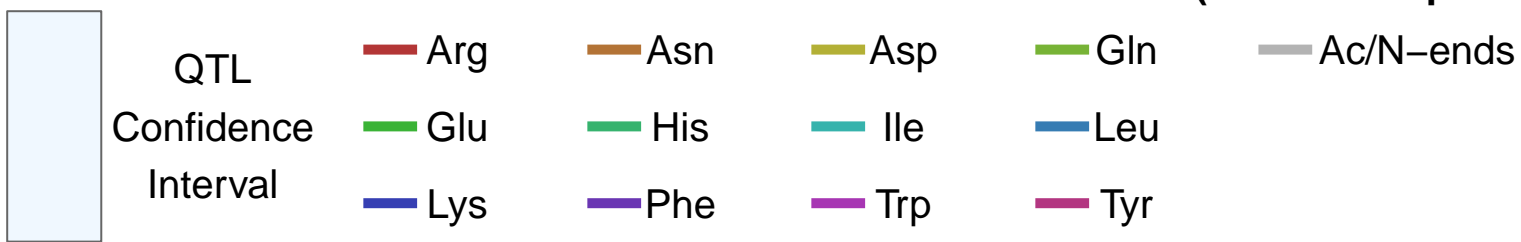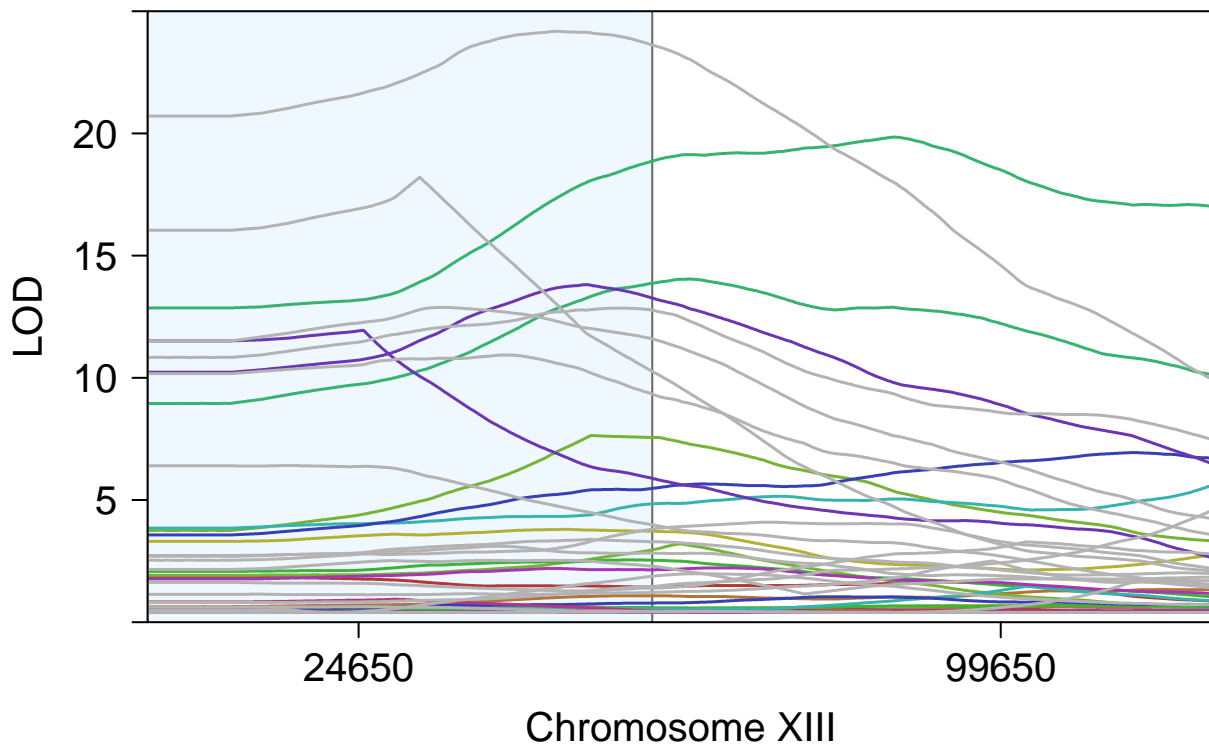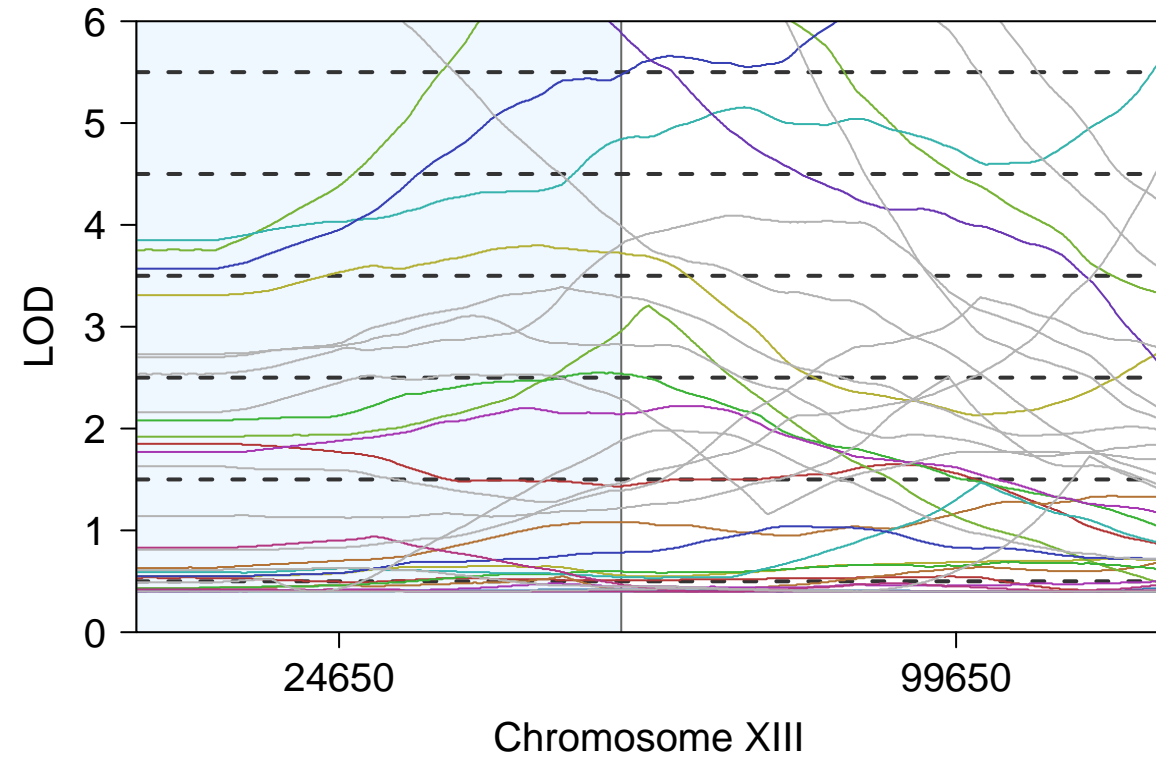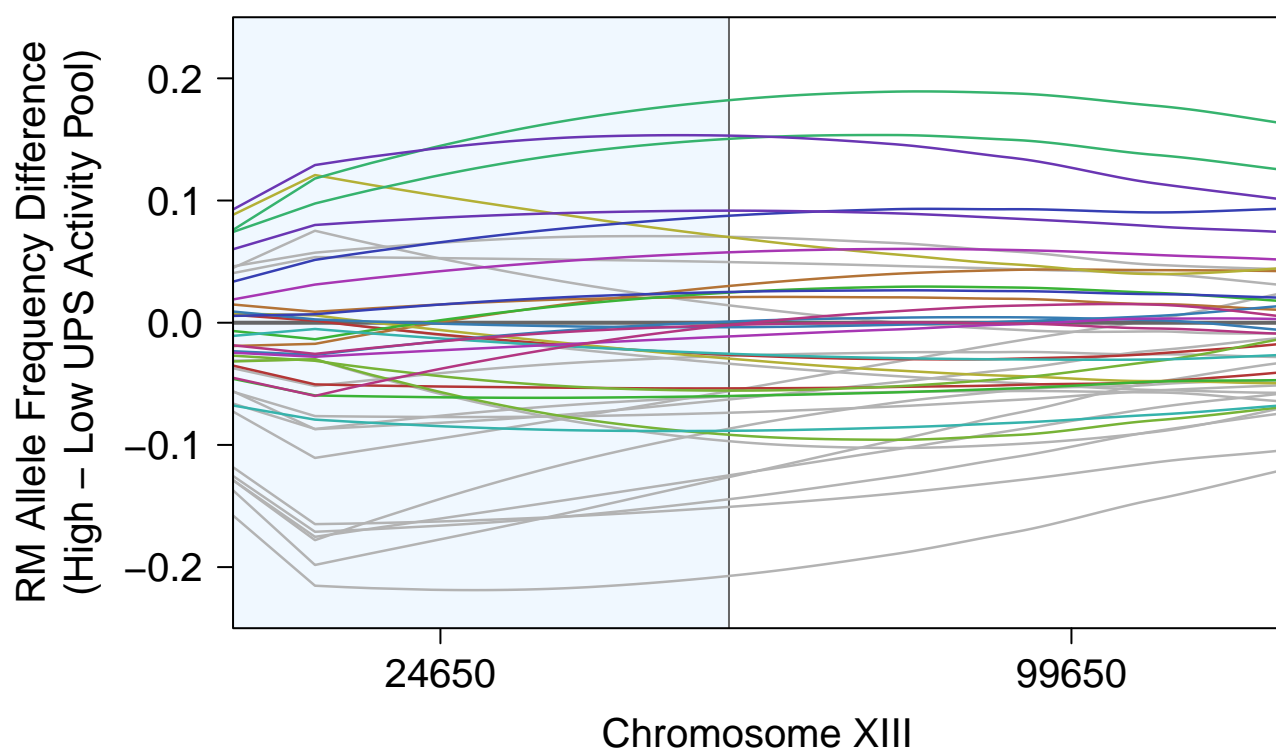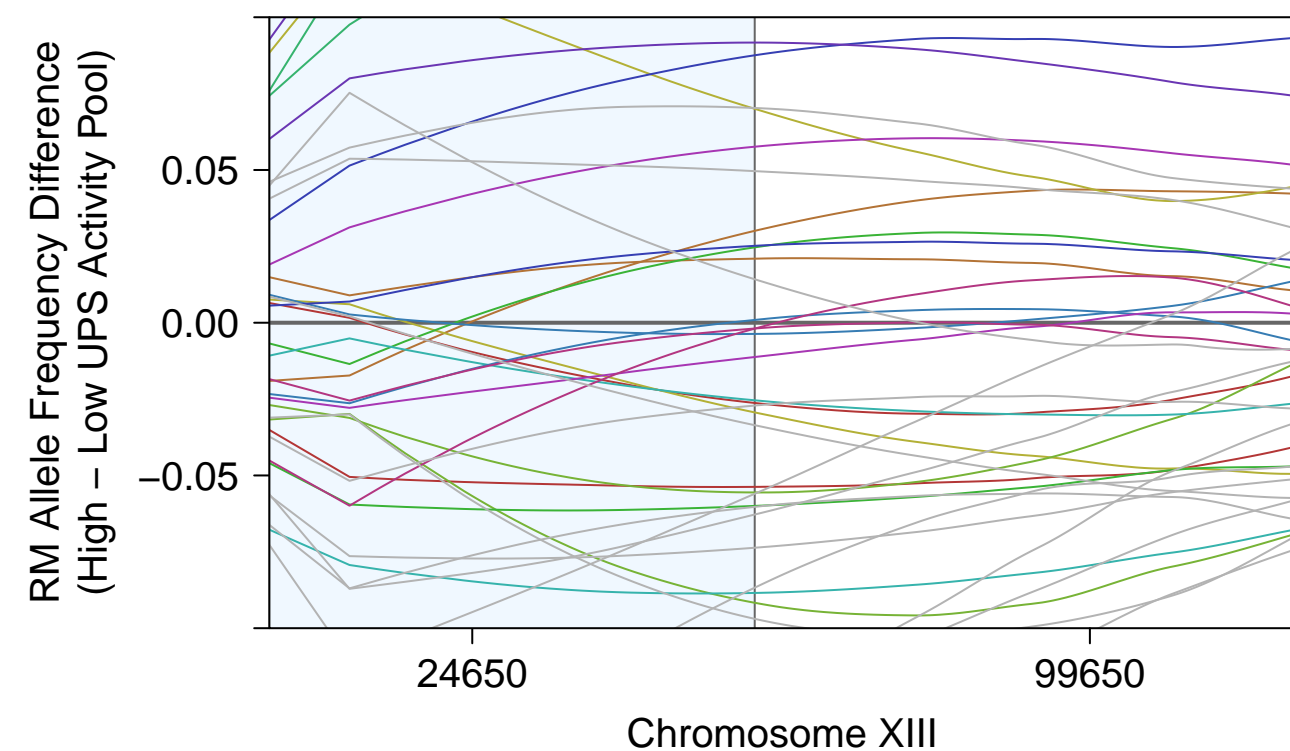



### Chromosome XIIIb 31800..77675 (Arg/N-end specific)

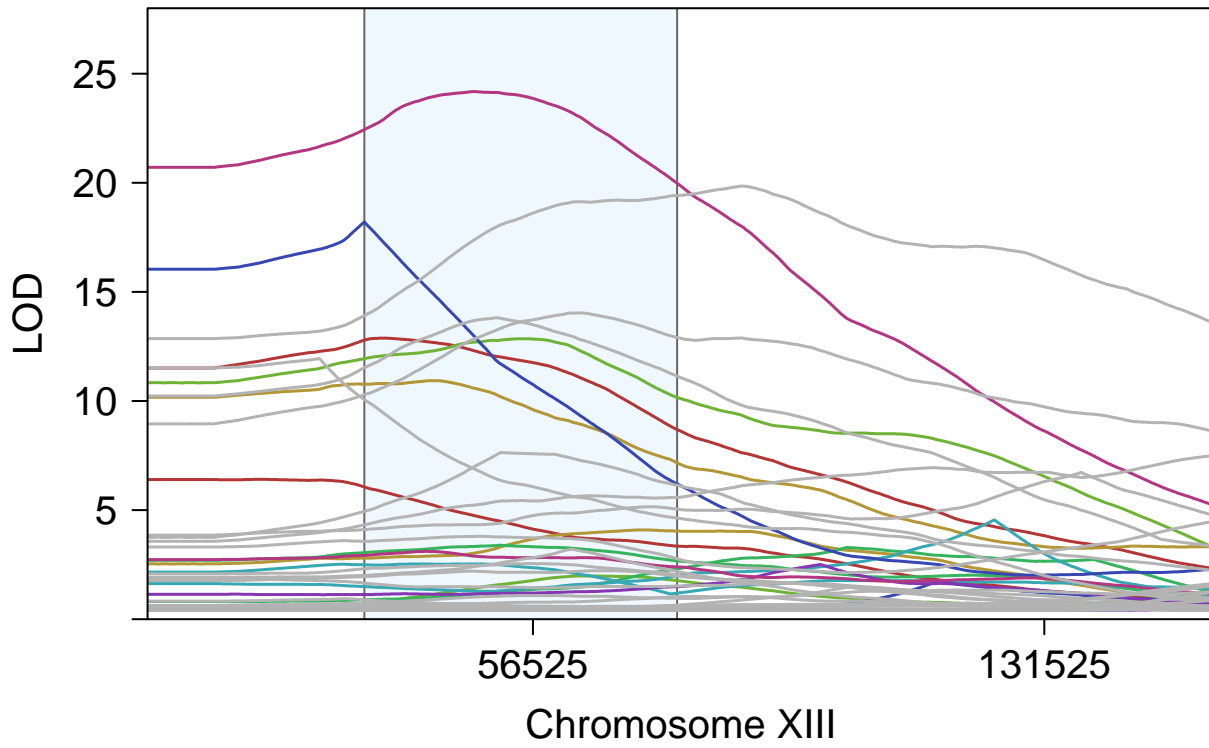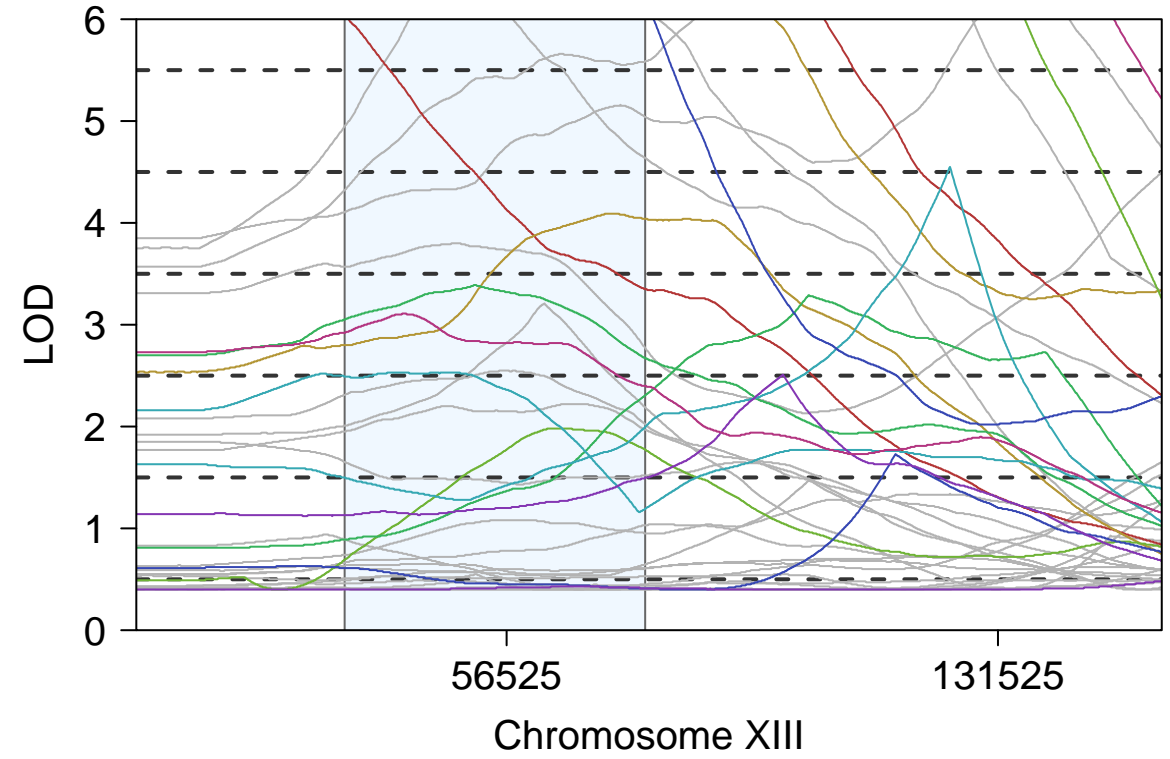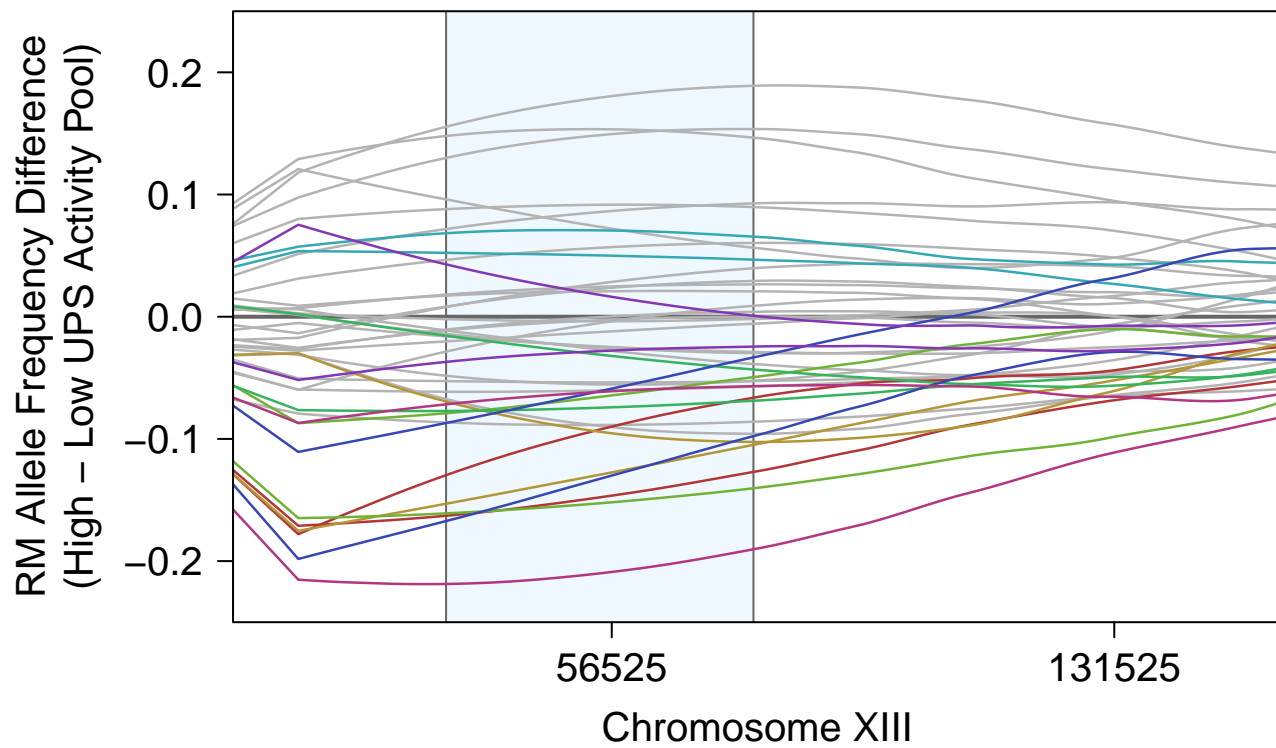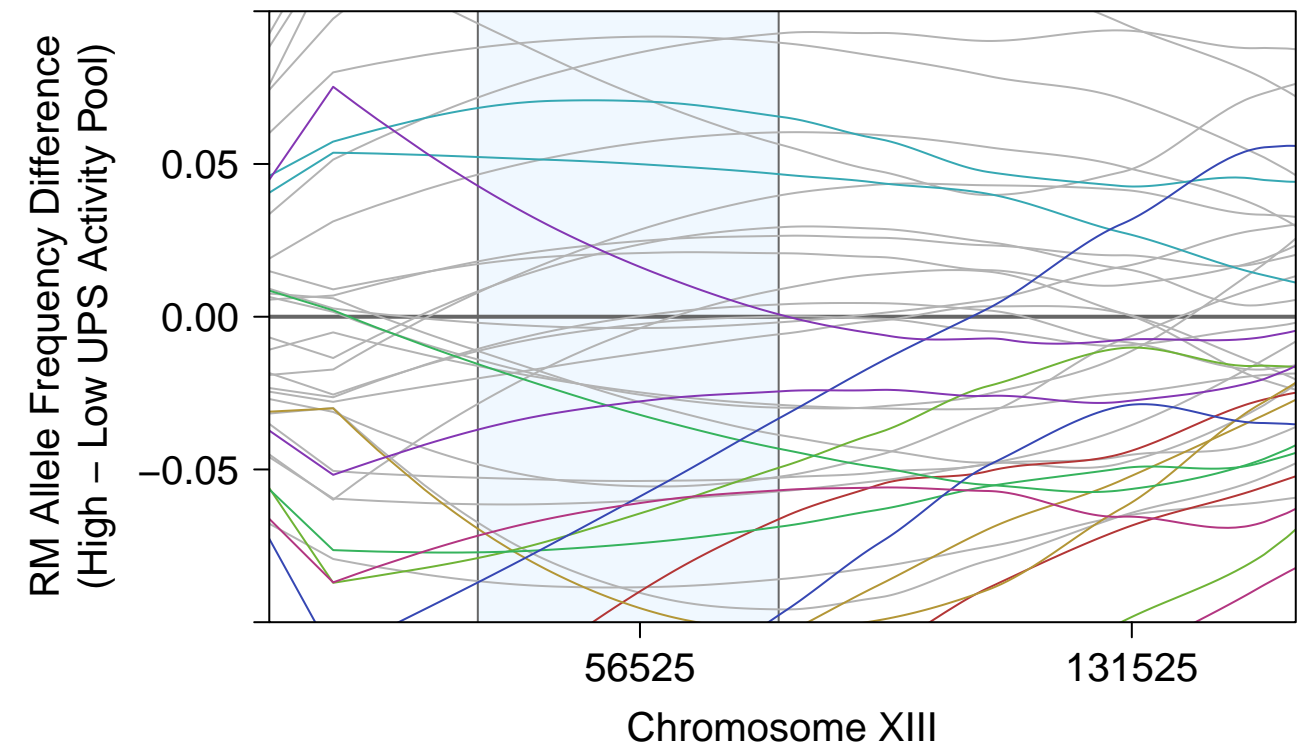

### Chromosome XIIIc 265350..331584 (Arg/N-end specific)

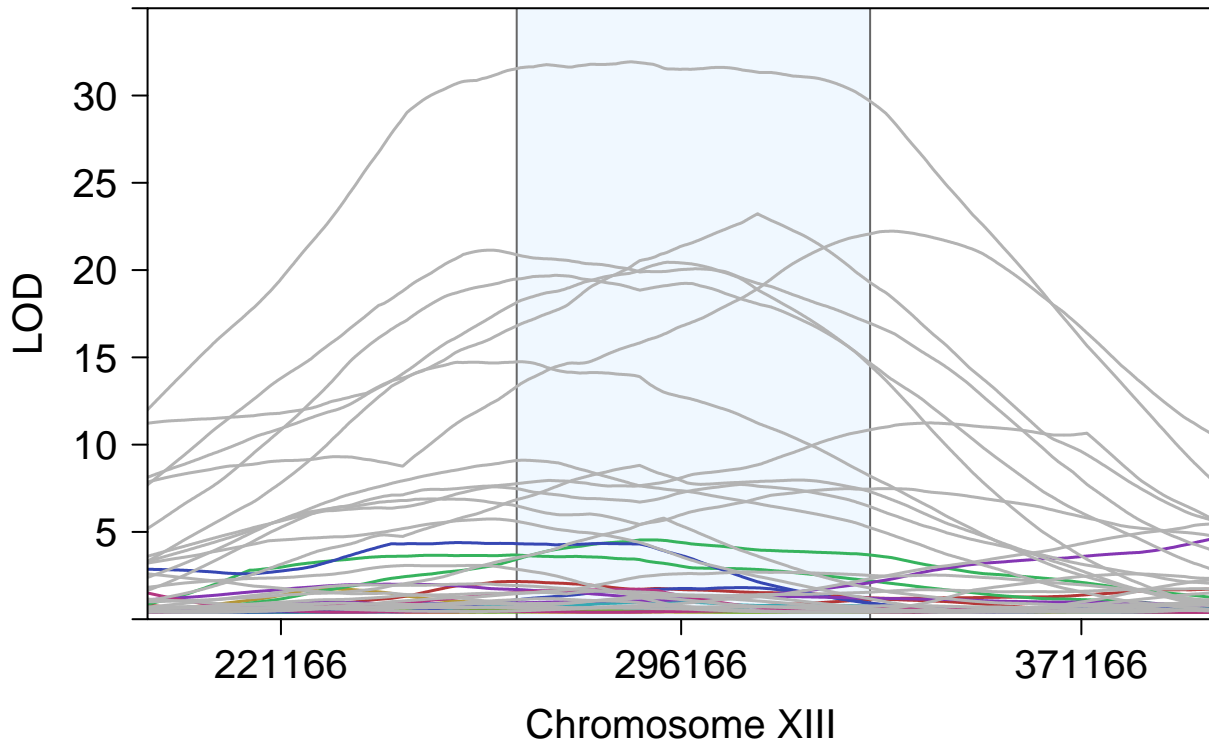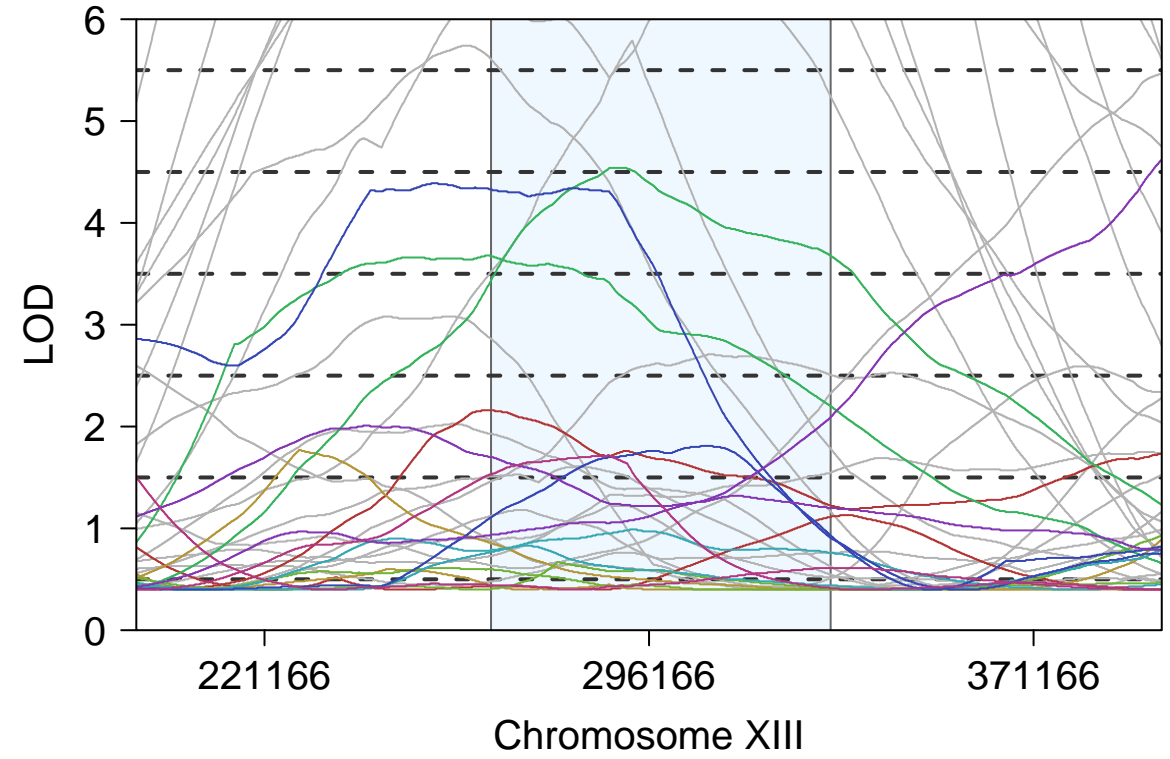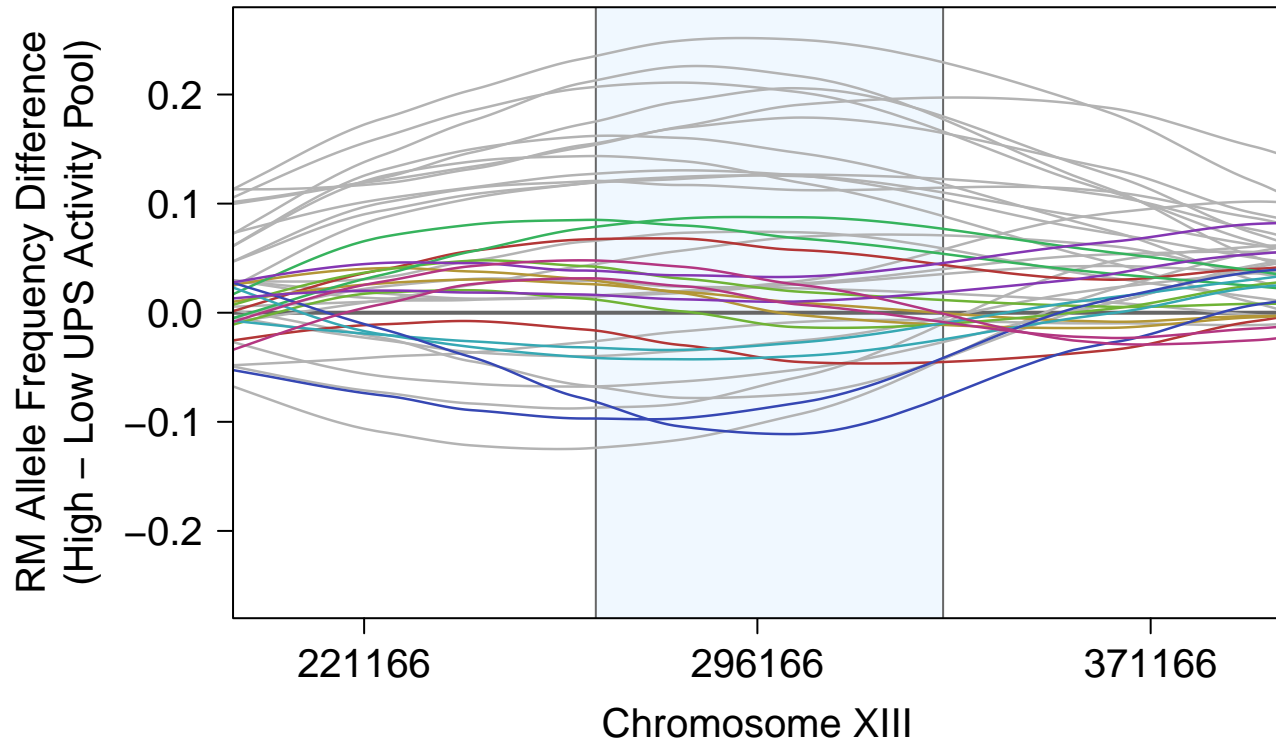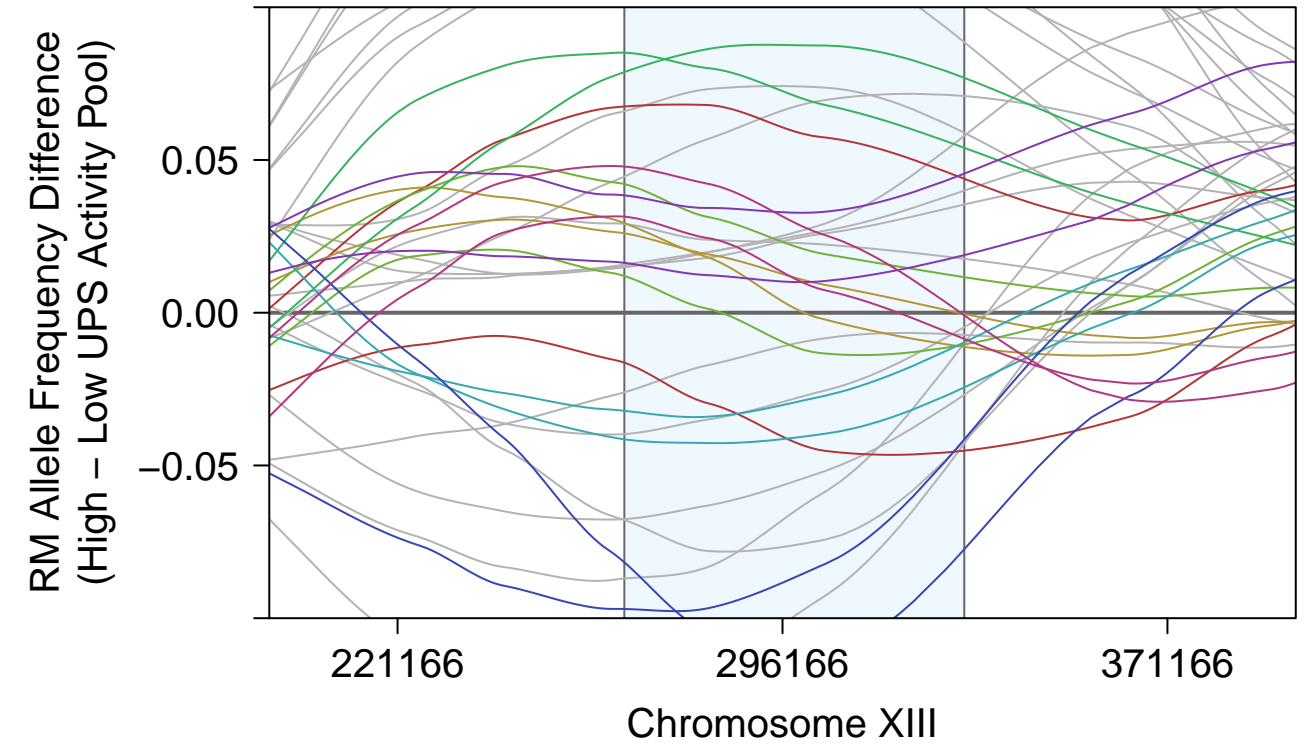

**Chromosome XVb 342850..431300 (Ac/N-end specific)**

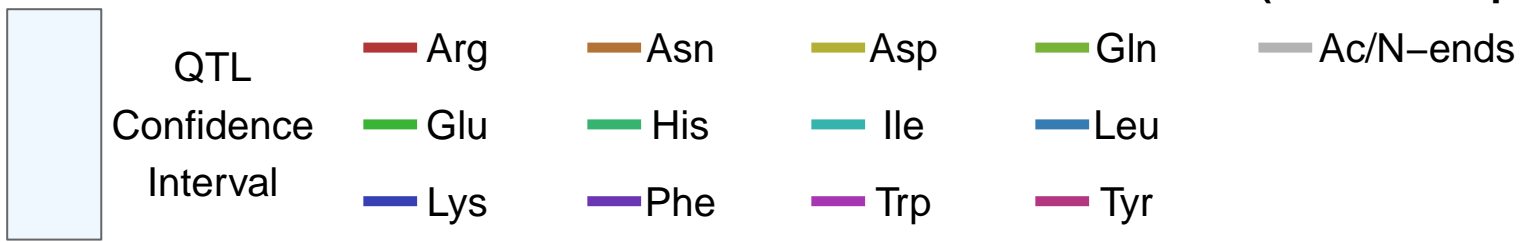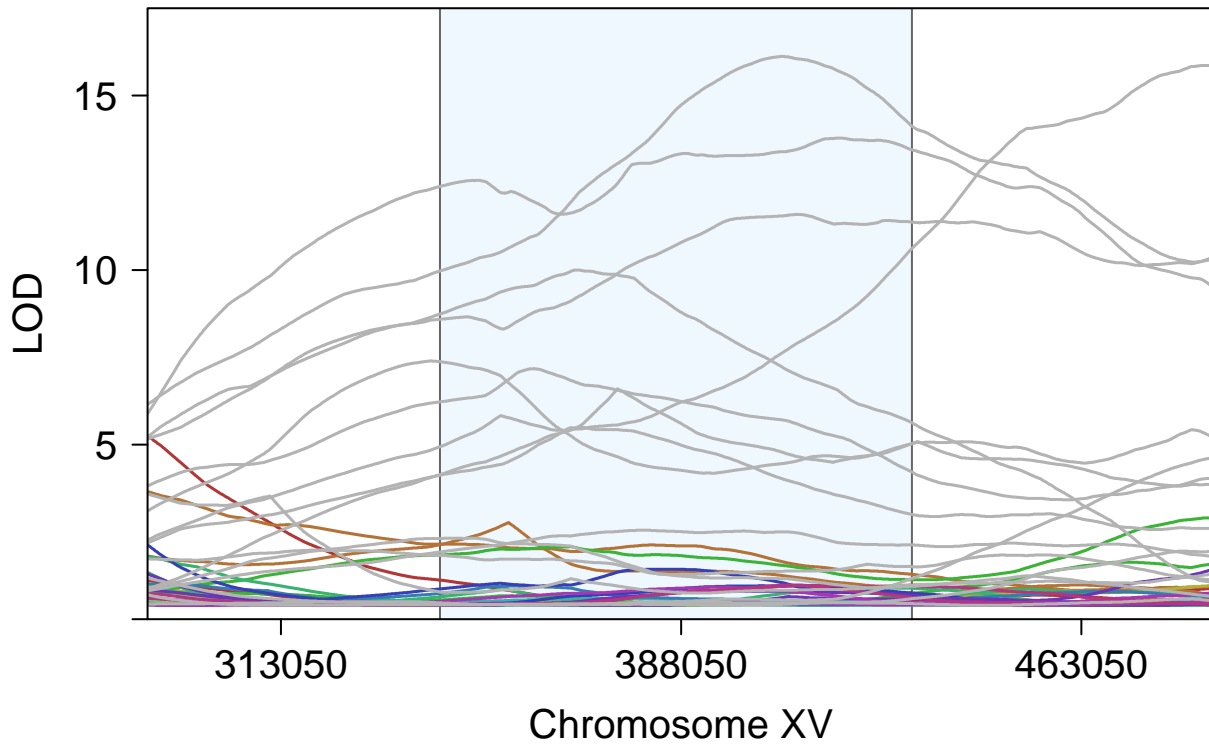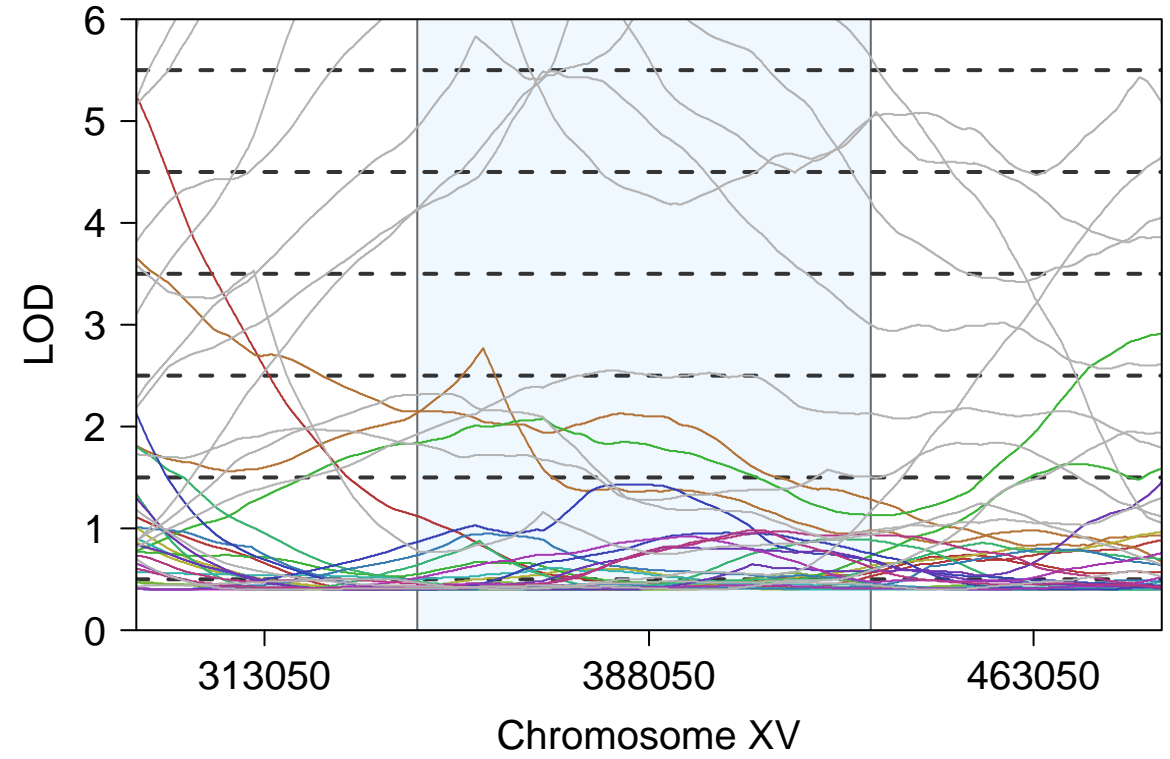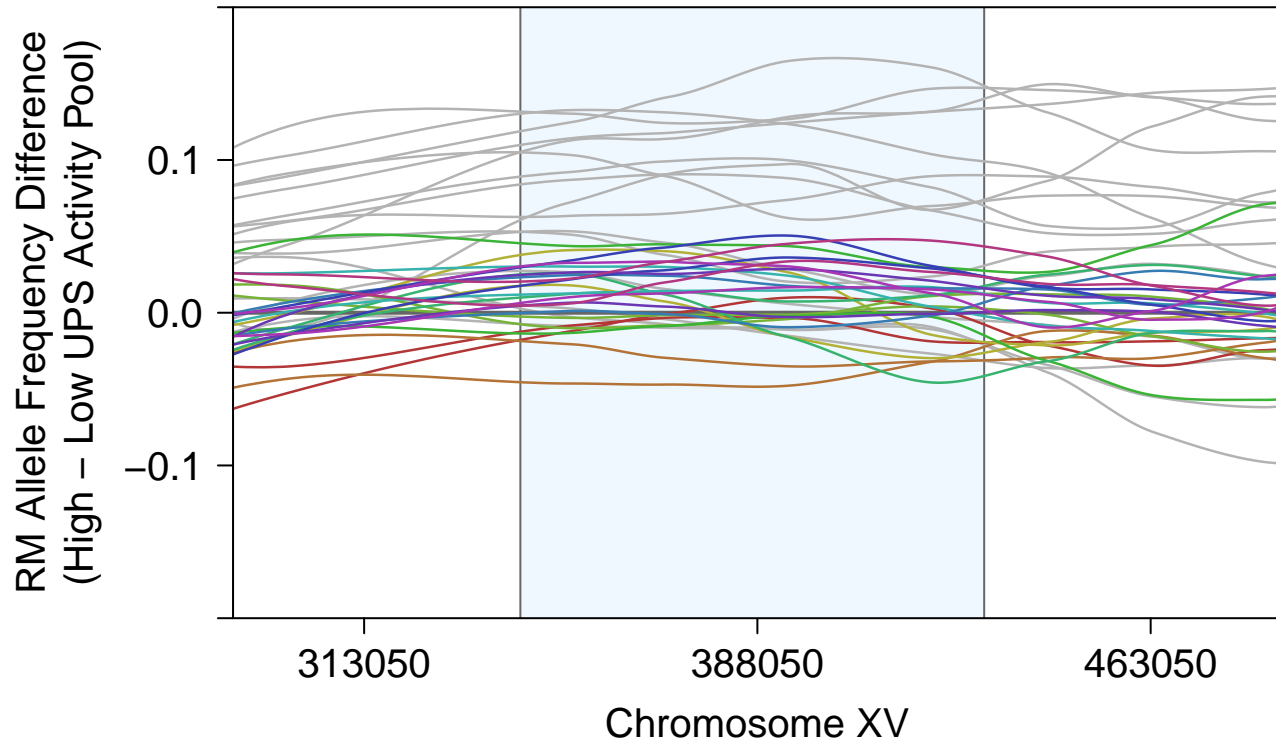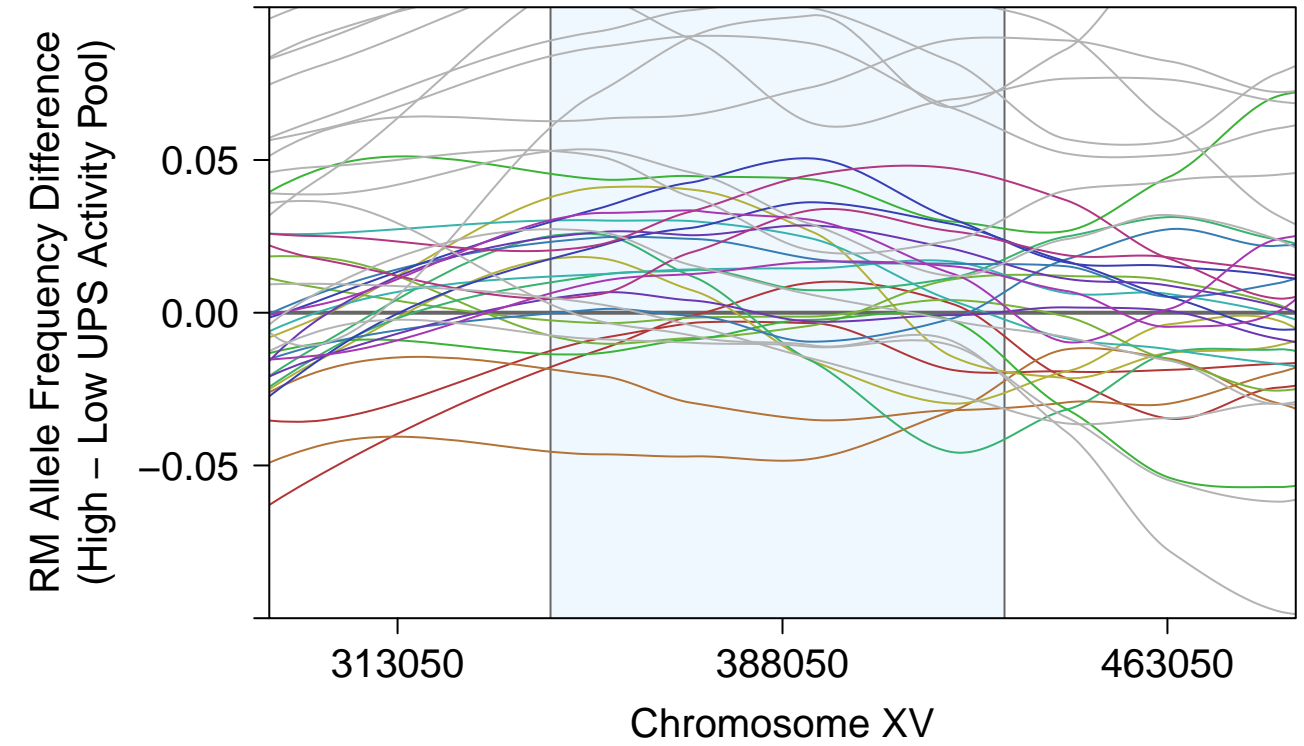

**Chromosome XVc 525200..591775 (Ac/N-end specific)**

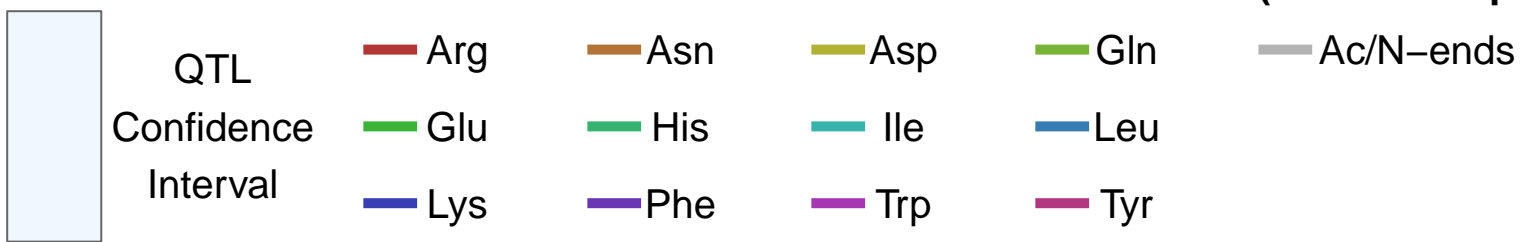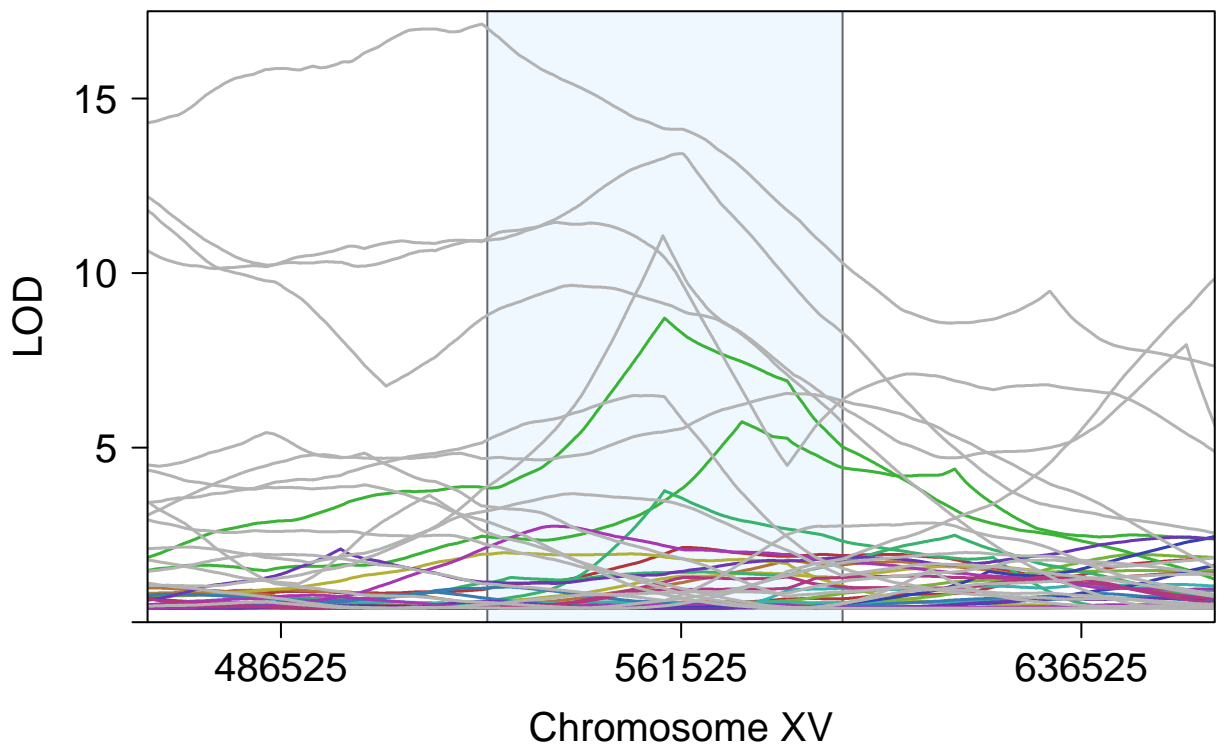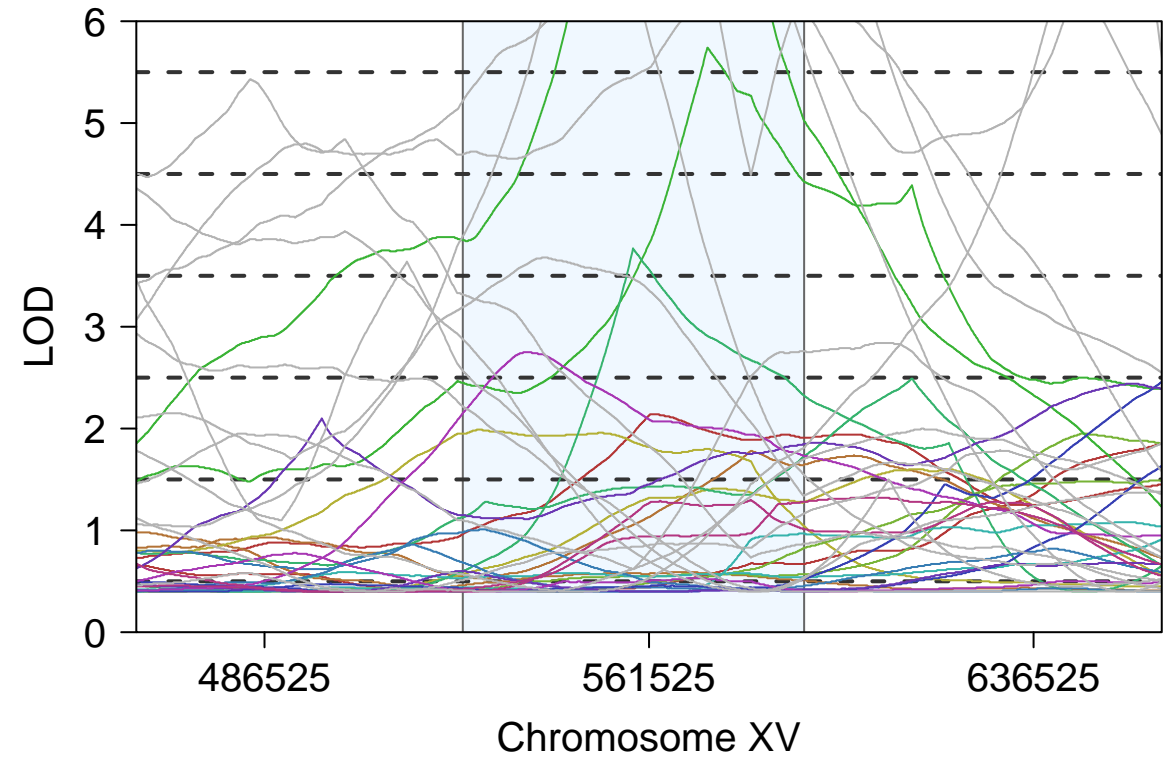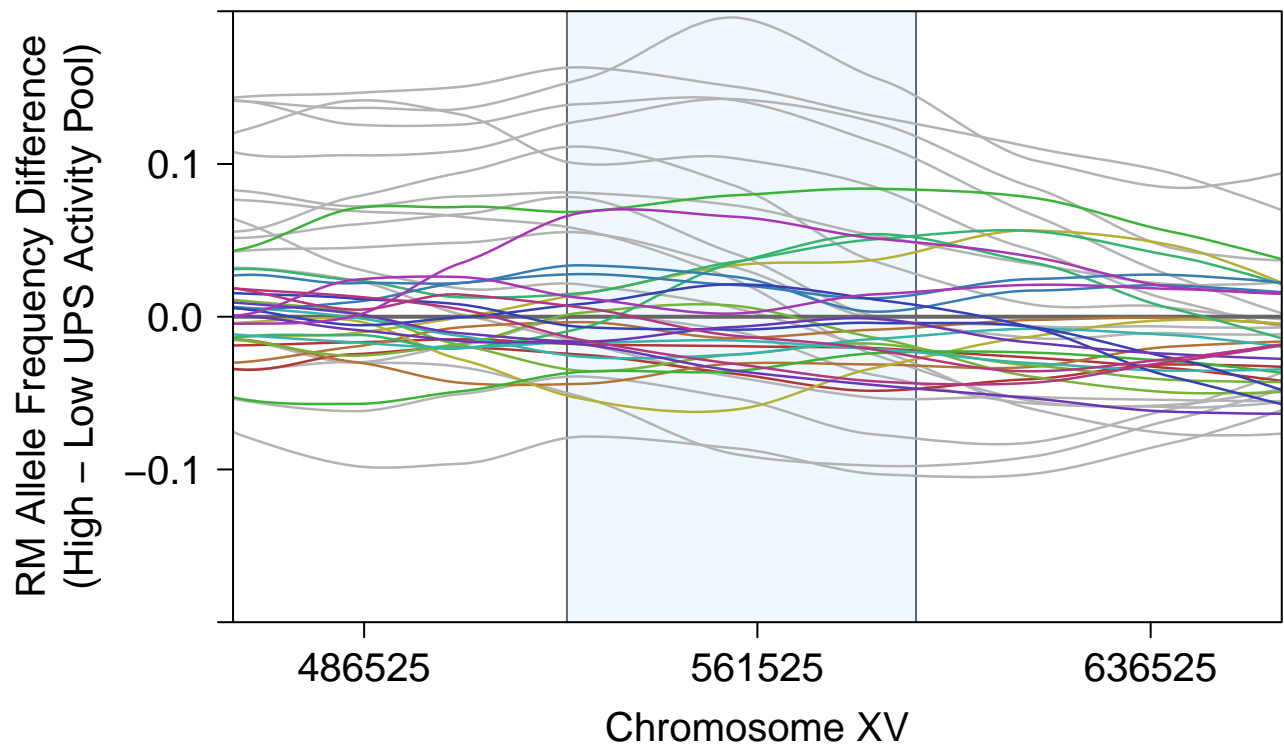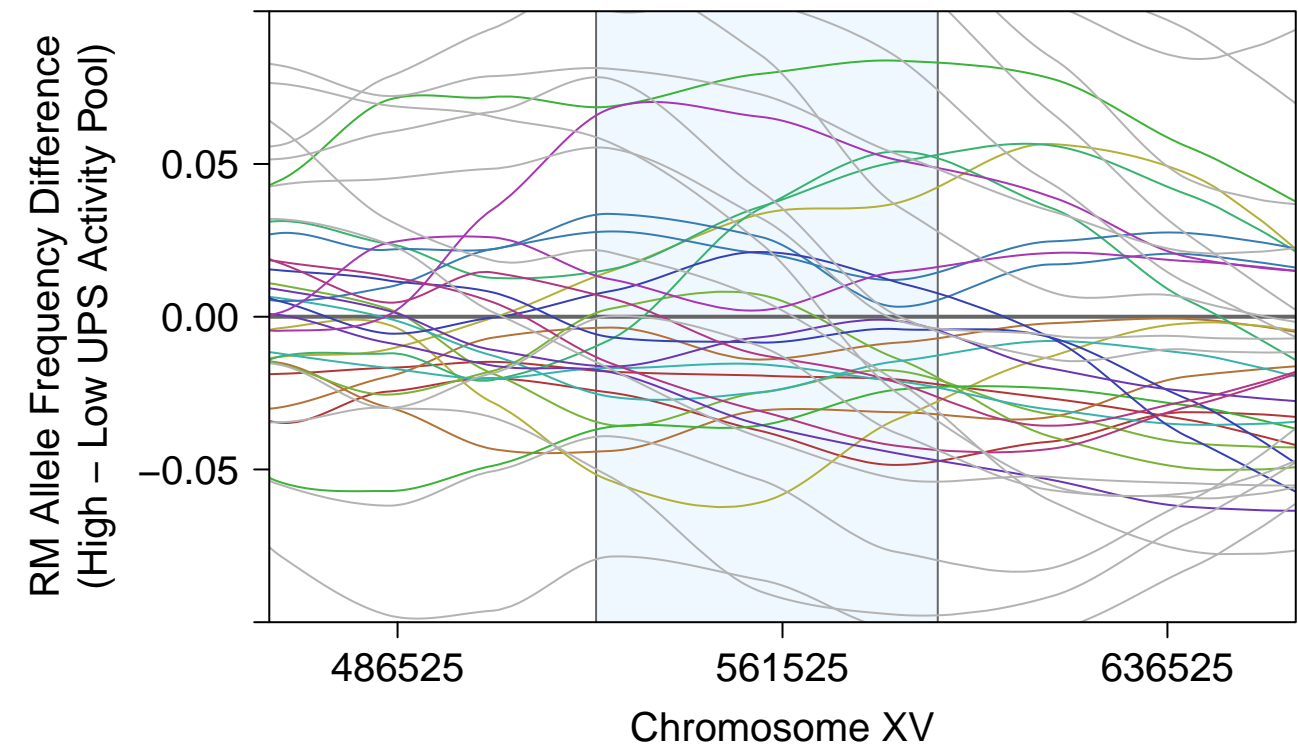

**Chromosome XVd 518550..594650 (Ac/N-end specific)**

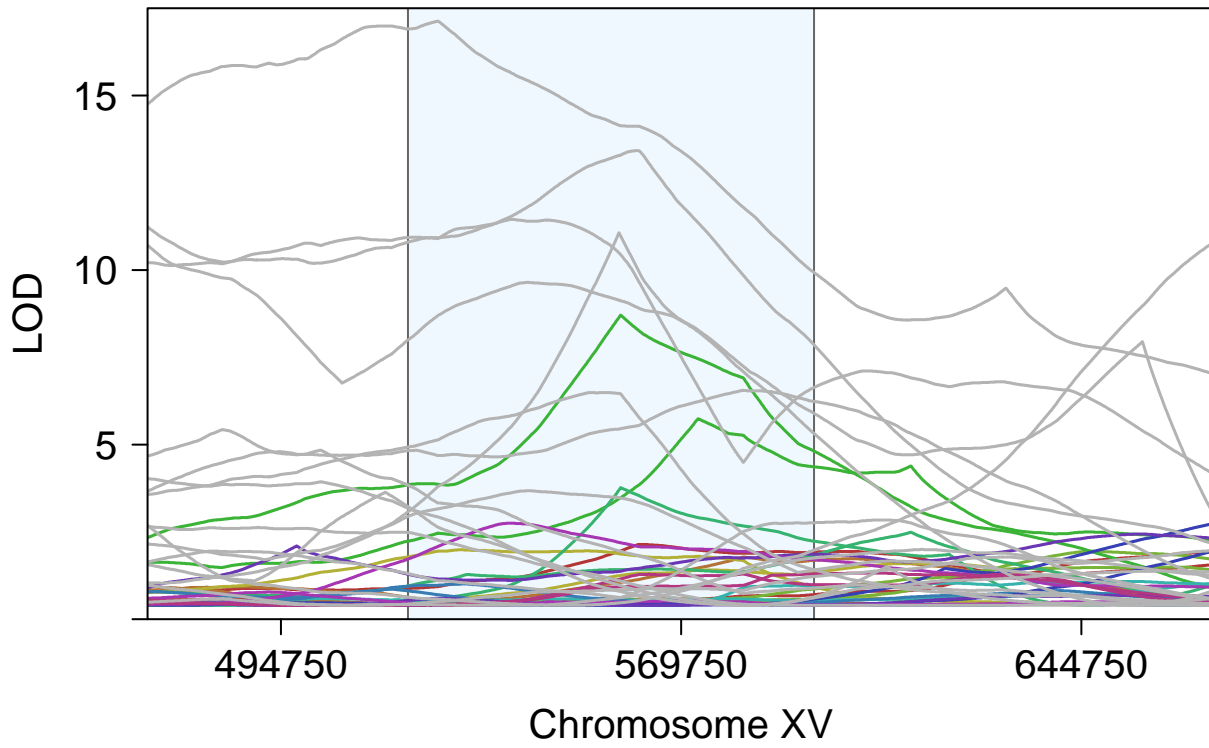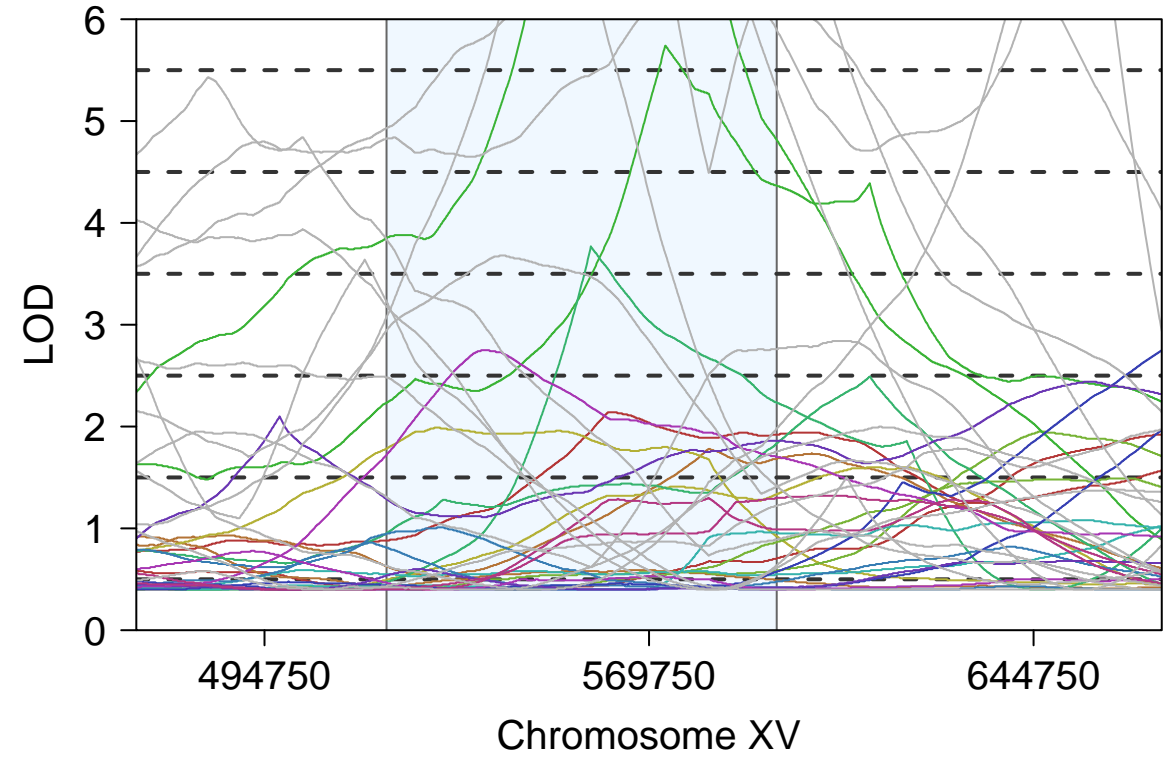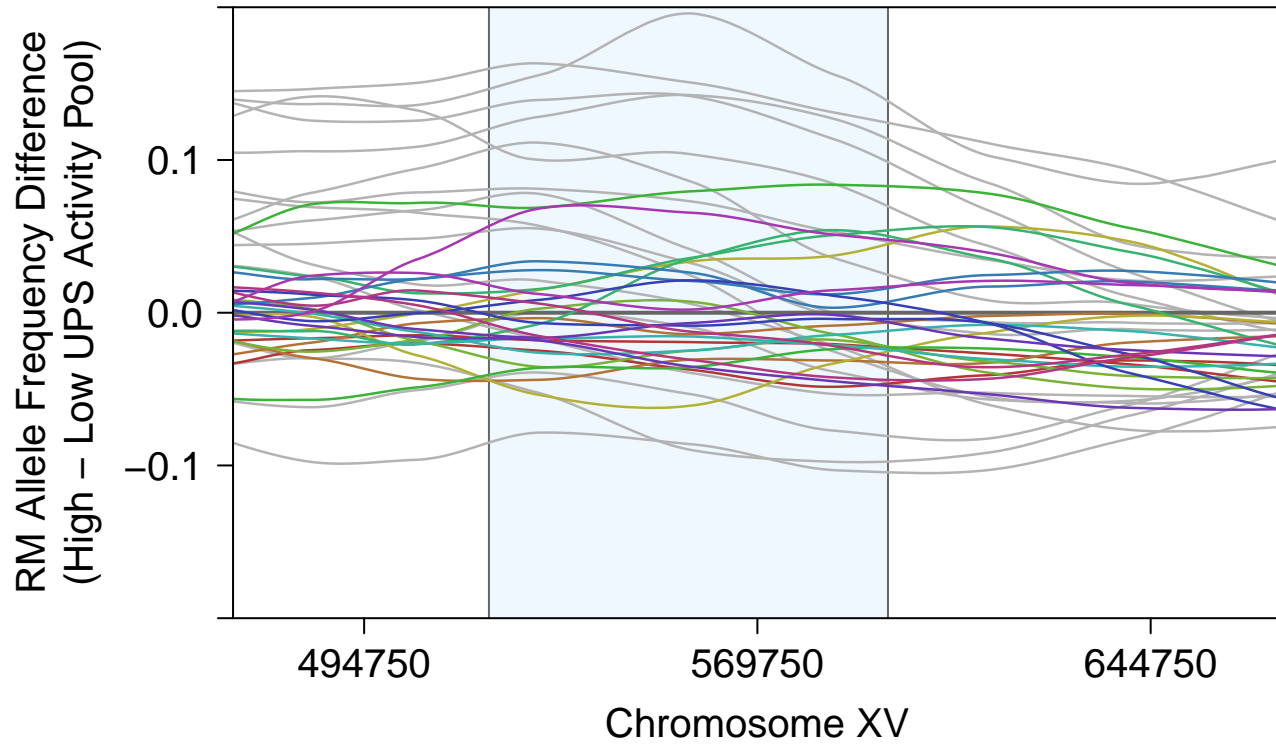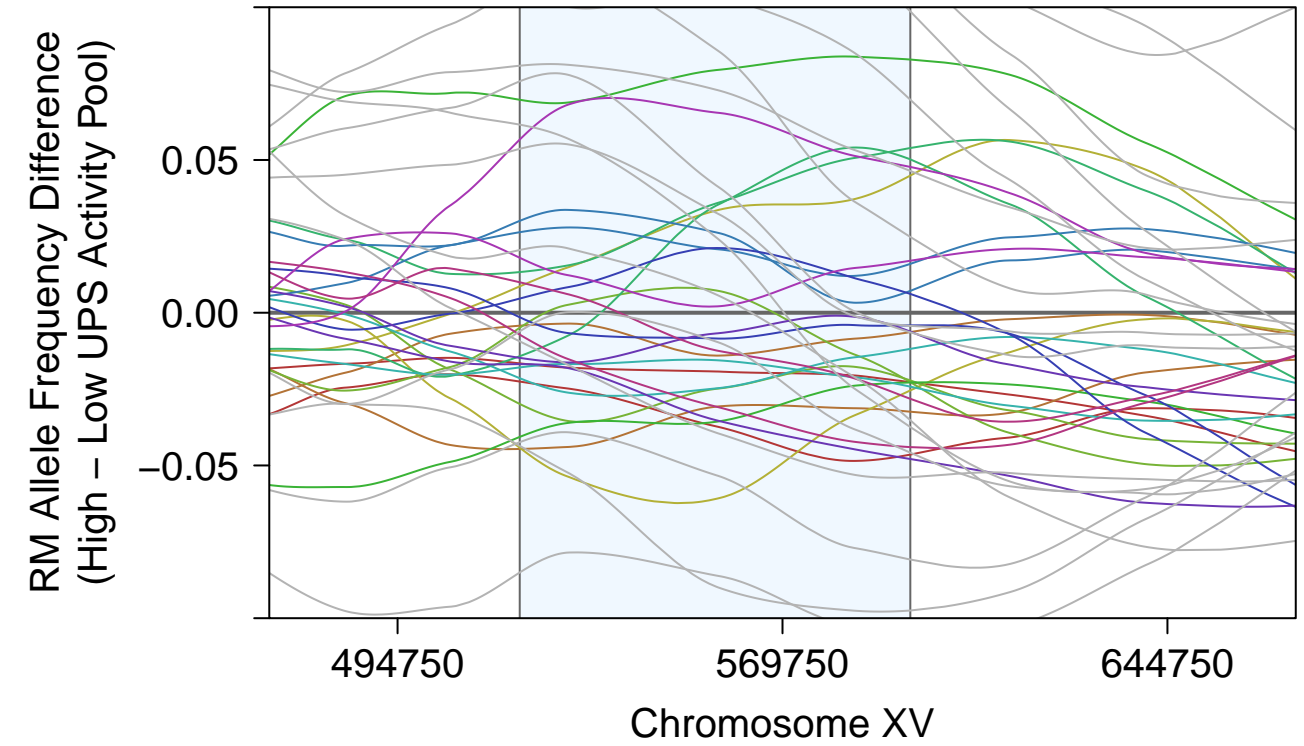

### Chromosome XVIa 166030..222070 (Ac/N-end specific)

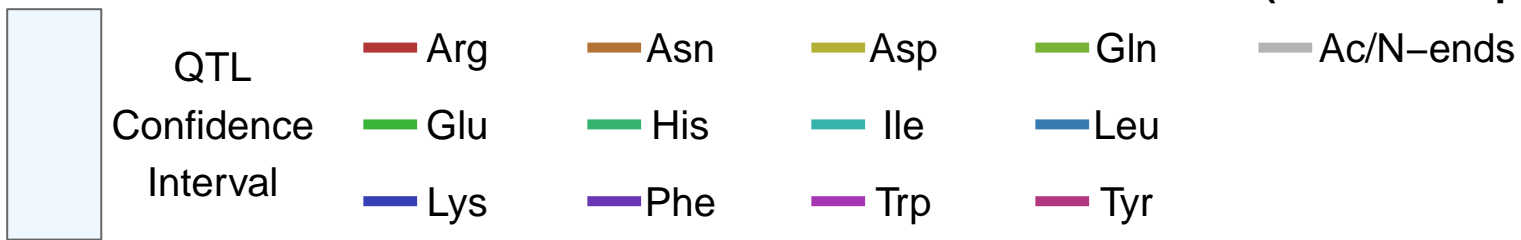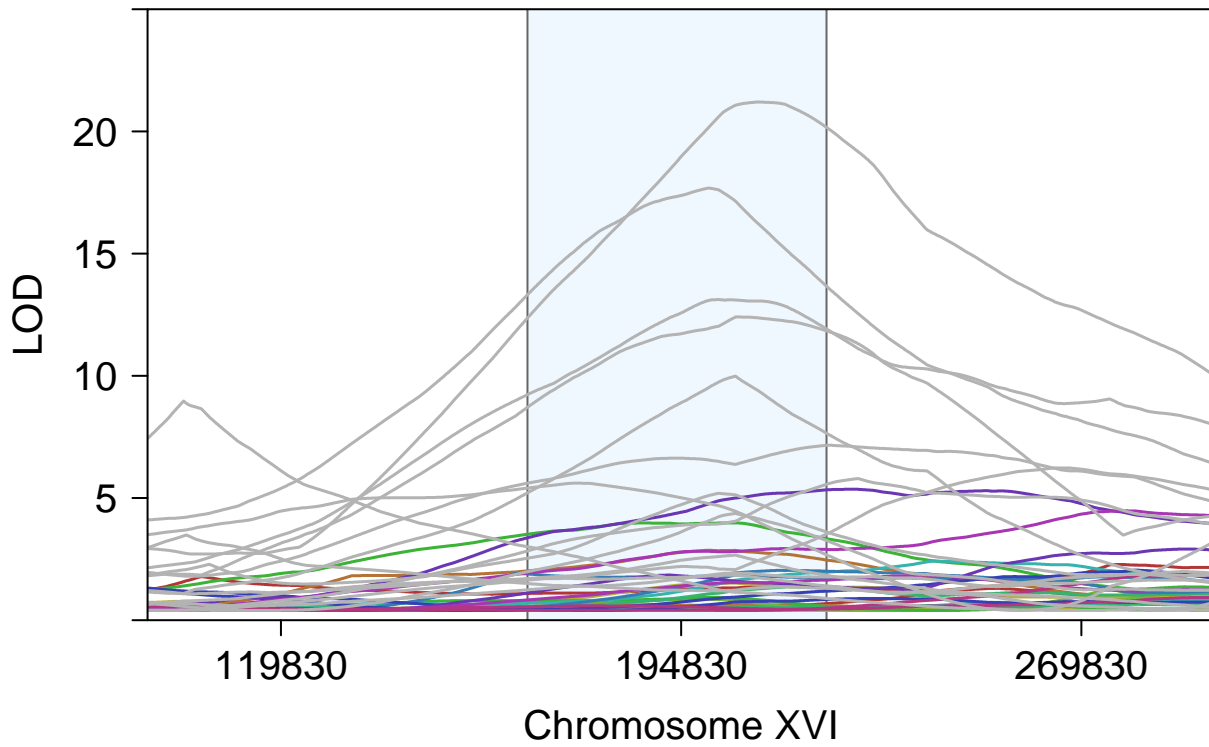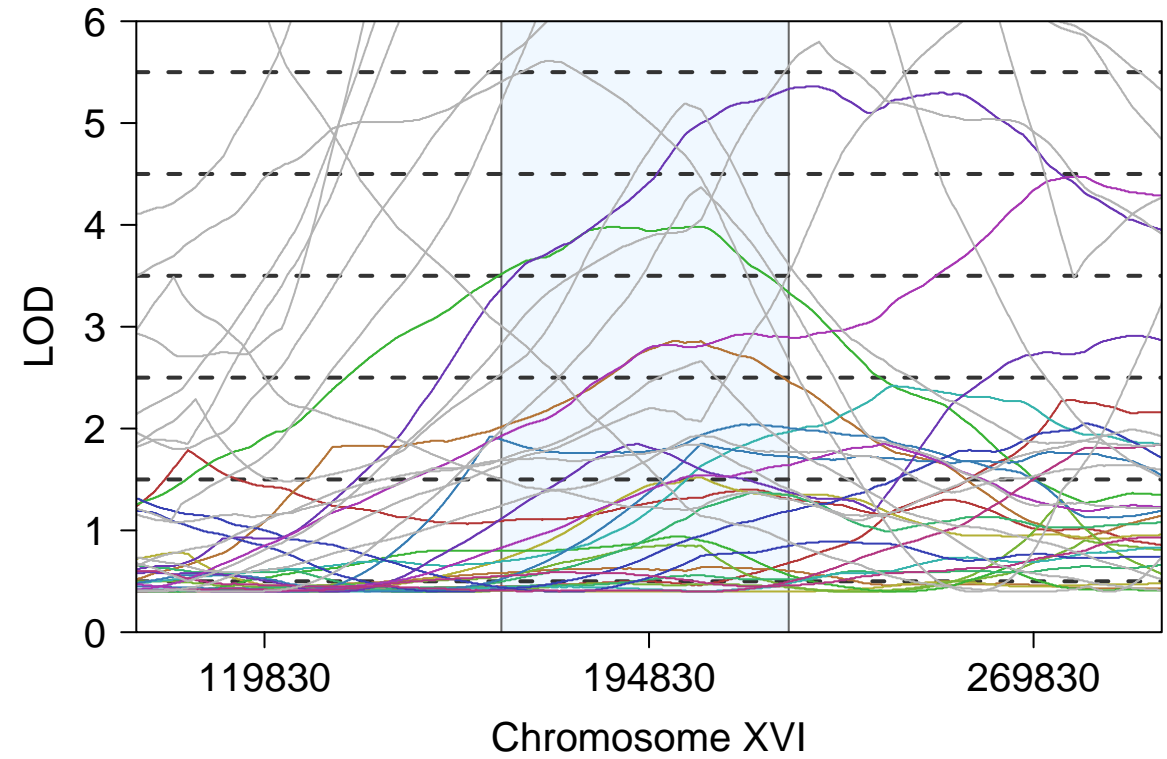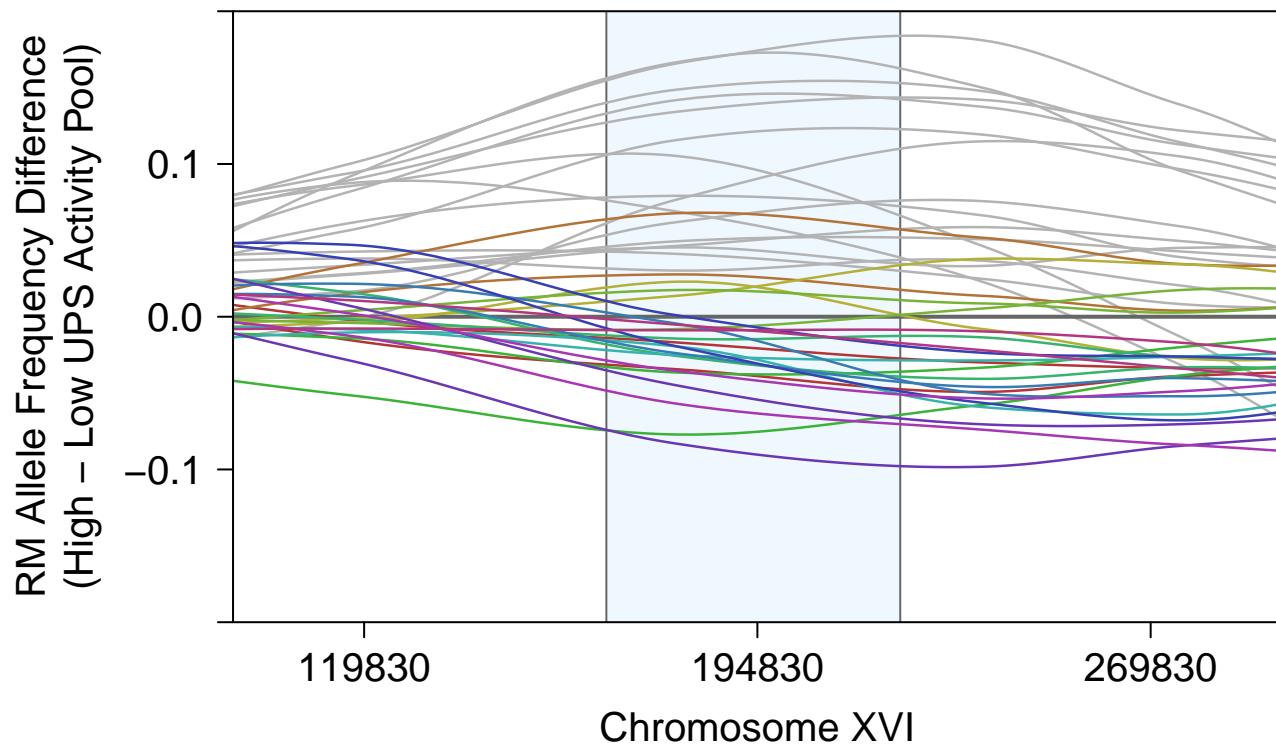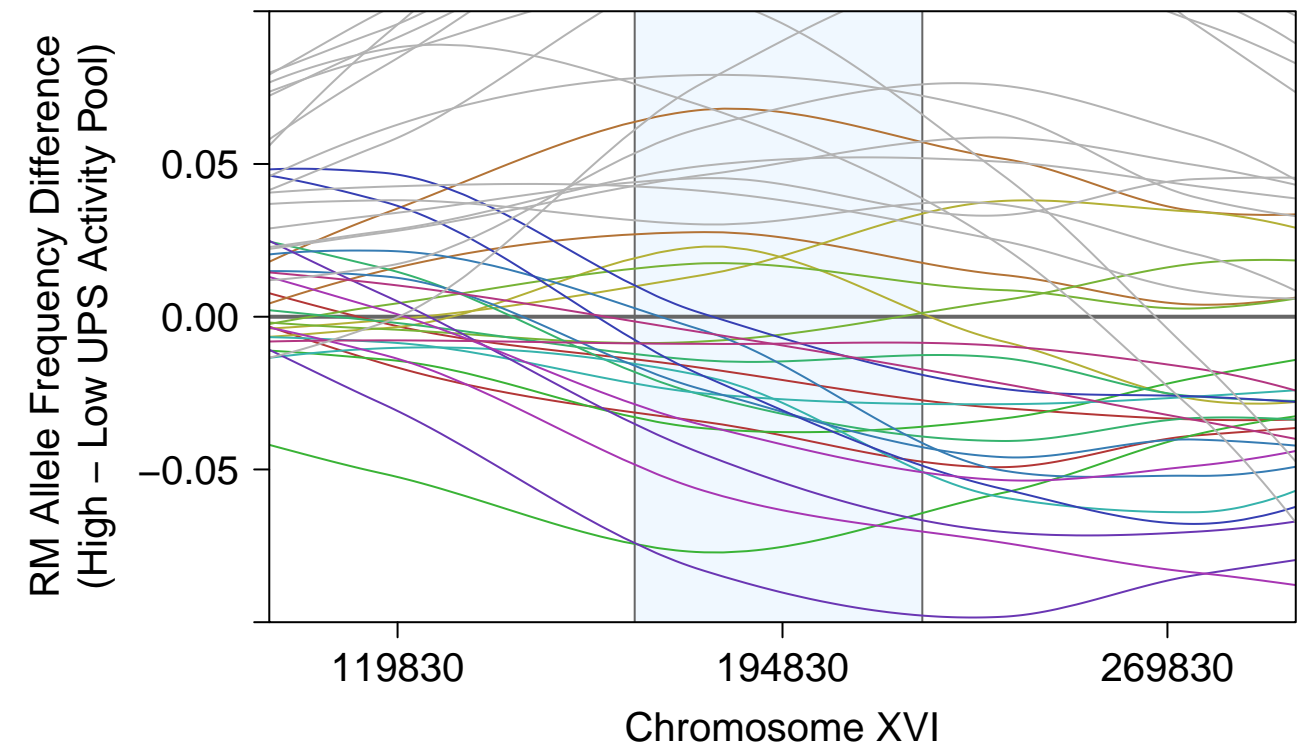

### Chromosome XVIb 375050..428950 (Ac/N-end specific)

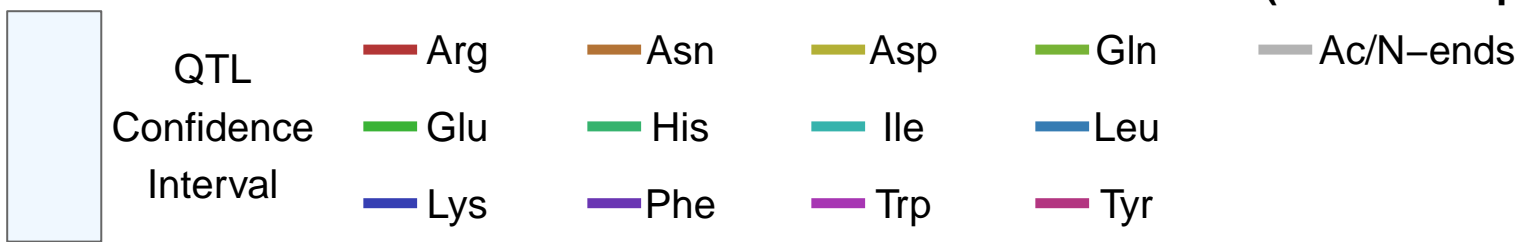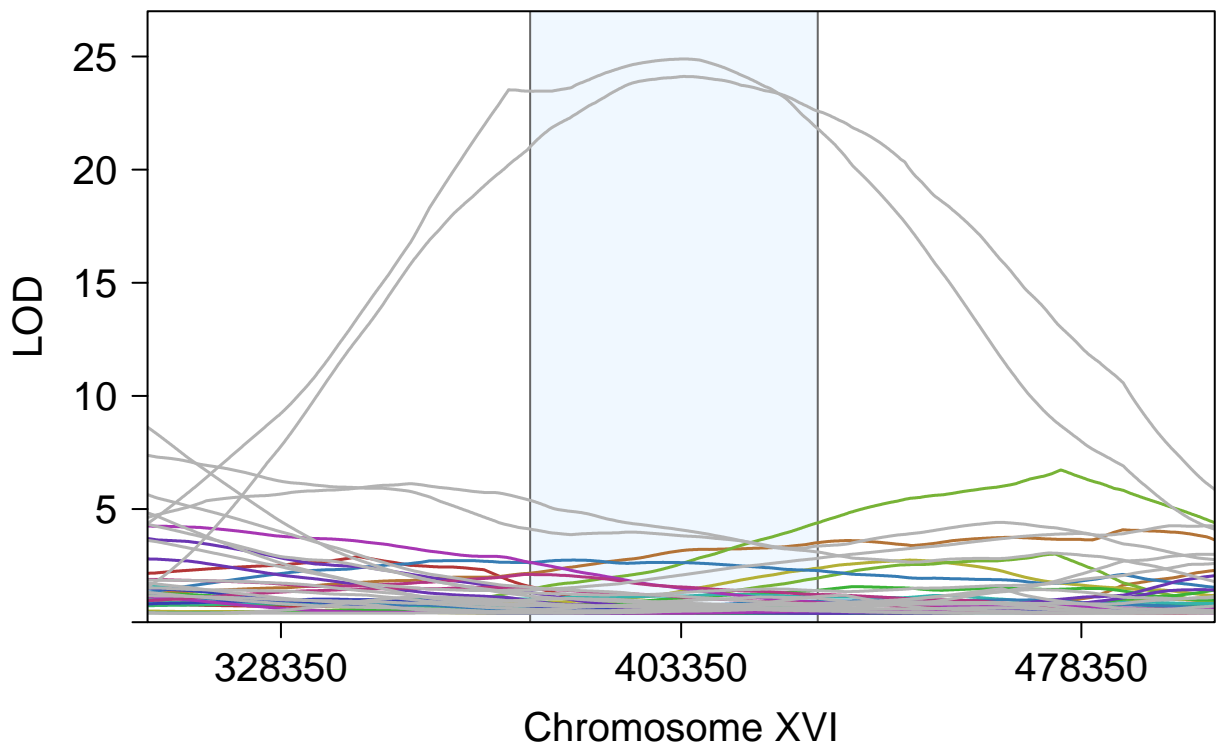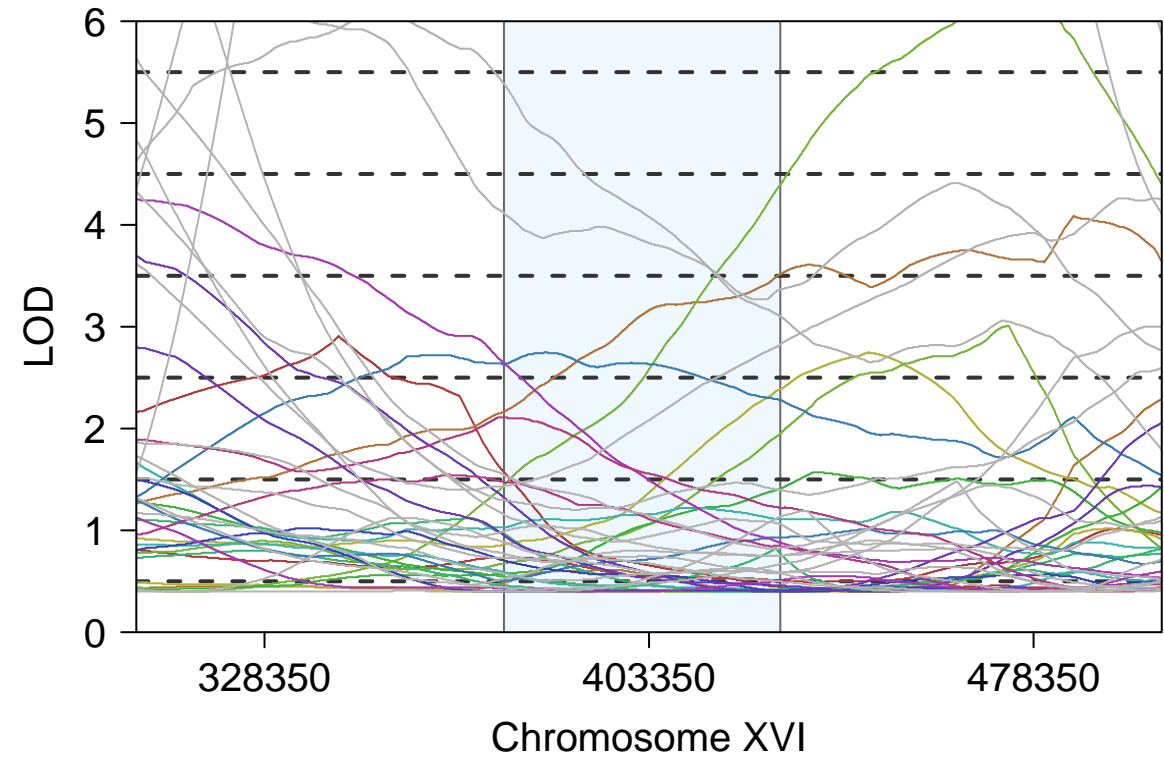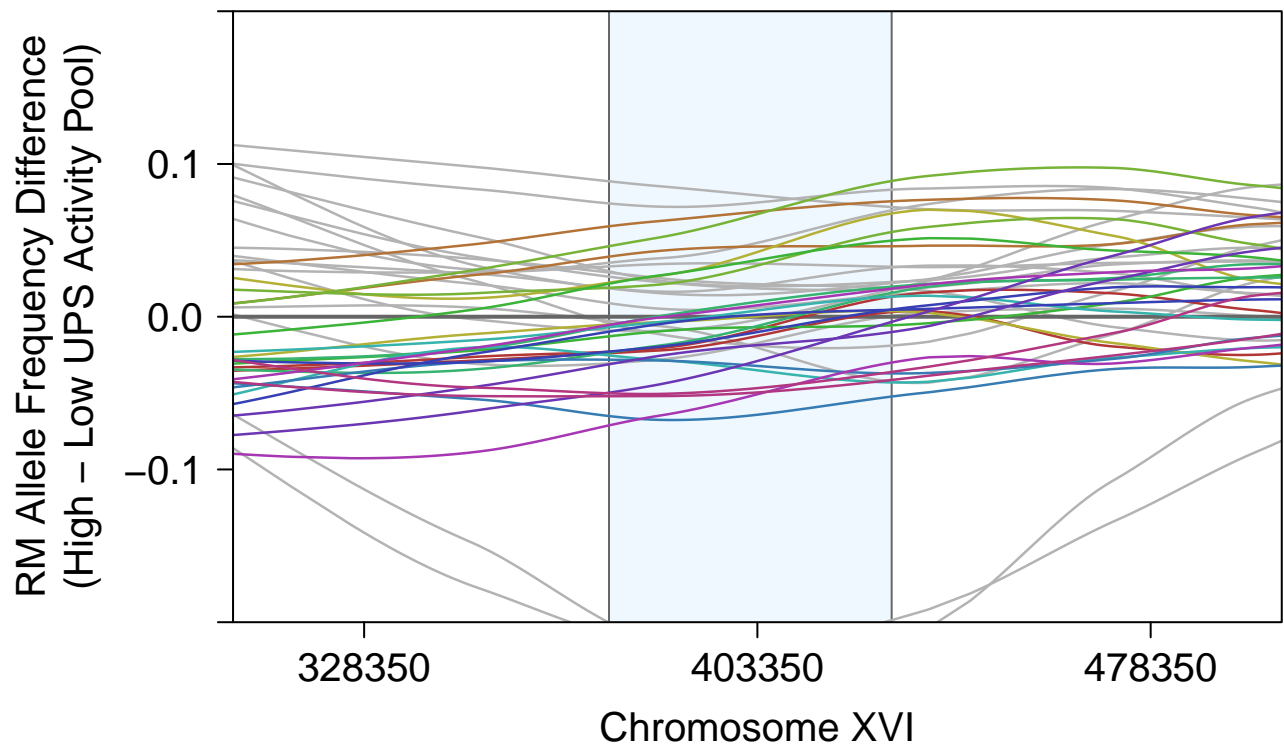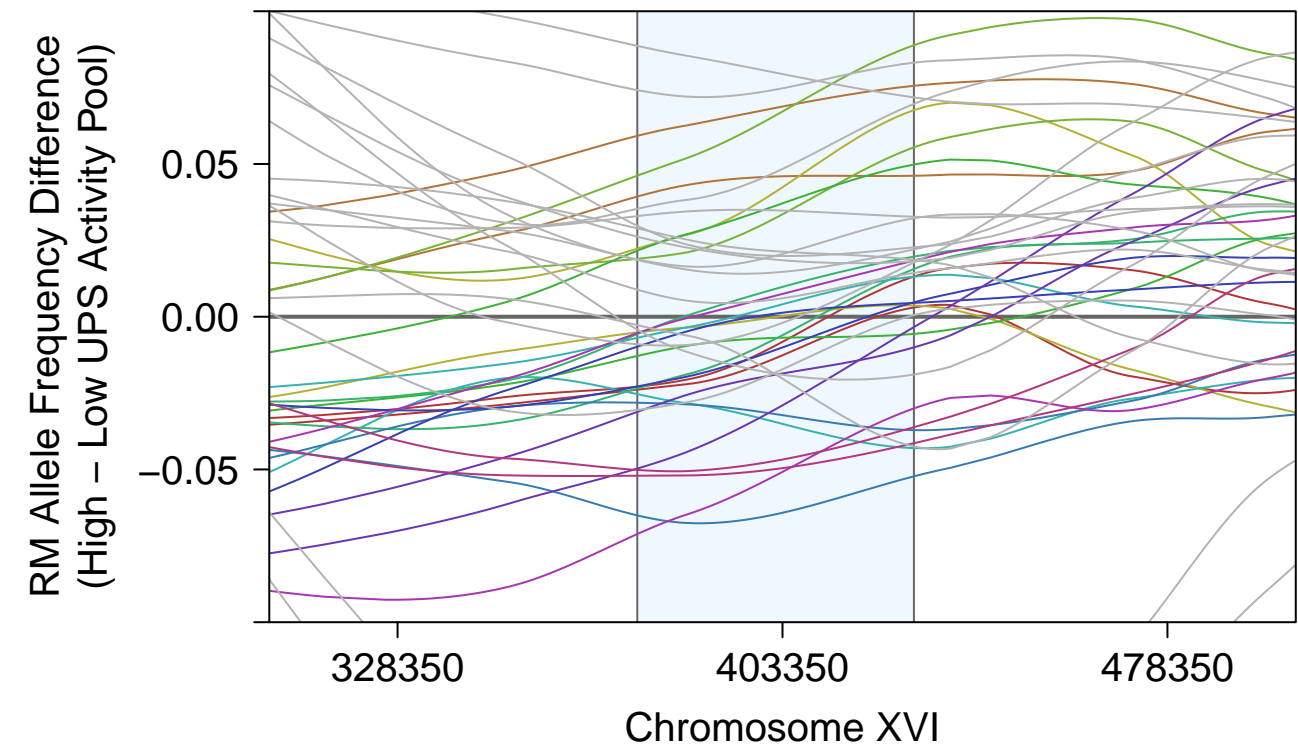

Supplement: supp2 [file elife-79570-supp2-v2.pdf]
