# Supplementary material for: Variation in ubiquitin system genes creates substrate-specific effects on proteasomal protein degradation
Source: eLife. 2022 Oct 11;11:e79570. doi: 10.7554/eLife.79570 (PMC9634822; doi:10.7554/eLife.79570)
Supplement: Figure 1—source data 1. [file elife-79570-fig1-data1.xlsx]

## Sheet: Sheet1
N-degron	Δ Means BY/RM	p.adj BY/RM	Δ Means BY/BY rpn4Δ	p.adj BY/BY rpn4Δ	Δ Means BY/BY ubr1Δ	p.adj BY/BY ubr1Δ	Δ Means BY/BY doa10Δ	p.adj BY/BY doa10Δ	Δ Means RM/BY rpn4Δ	p.adj RM/BY rpn4Δ	Δ Means RM/BY ubr1Δ	p.adj RM/BY ubr1Δ	Δ Means RM/BY doa10Δ	p.adj RM/BY doa10Δ	Δ Means BY rpn4Δ/BY ubr1Δ	p.adj BY rpn4Δ/BY ubr1Δ	Δ Means BY rpn4Δ/BY doa10Δ	p.adj BY rpn4Δ/BY doa10Δ	Δ Means BY ubr1Δ/BY doa10Δ	p.adj BY ubr1Δ/BY doa10Δ
Ala	-0.96	1.41e-14	1.76	6.27e-23	-0.438	3.92e-06	1.258	3.42e-18	2.72	2.6e-29	0.522	1.1e-07	2.218	2.69e-26	-2.198	3.66e-26	-0.502	2.54e-07	1.696	2.15e-22
Arg	-0.132	9.48e-06	0.214	2.33e-10	0.665	1.75e-25	0.129	1.46e-05	0.346	2.74e-16	0.797	3.75e-28	0.261	1.13e-12	0.451	6.85e-20	-0.085	0.00514	-0.536	2.37e-22
Asn	-0.663	7.25e-12	0.753	2.05e-13	4.627	1.48e-39	0.127	0.432	1.415	5.74e-22	5.289	1.4e-41	0.79	5.11e-14	3.874	7.08e-37	-0.626	3.4e-11	-4.5	3.89e-39
Asp	-0.271	0.000532	-0.202	0.0151	2.819	1.65e-32	0.099	1	0.068	1	3.09	6.96e-34	0.37	3.3e-06	3.022	1.51e-33	0.301	0.000111	-2.72	5.65e-32
Cys	-0.556	8.14e-08	4.542	3.01e-36	-0.498	8.18e-07	6.718	3.69e-42	5.098	5.46e-38	0.058	1	7.274	2.31e-43	-5.041	8.1e-38	2.176	2.78e-25	7.216	3.04e-43
Gln	-0.281	2.89e-16	-0.052	0.0658	0.233	7.4e-14	0.014	1	0.228	1.35e-13	0.514	9.08e-25	0.295	6.42e-17	0.285	1.73e-16	0.066	0.00811	-0.219	4.42e-13
Glu	-0.115	5.19e-05	0.017	1	-0.035	1	0.008	1	0.132	5e-06	0.081	0.00615	0.123	1.69e-05	-0.051	0.229	-0.009	1	0.042	0.559
Gly	-0.704	7.93e-14	1.05	3.68e-19	-0.303	3.11e-05	0.78	3.81e-15	1.754	1.55e-26	0.401	1.46e-07	1.484	4.33e-24	-1.353	9.34e-23	-0.27	0.000194	1.083	1.36e-19
His	-0.201	7.87e-21	0.393	1.29e-30	0.636	7.29e-38	0.032	0.0138	0.594	8.07e-37	0.837	5.16e-42	0.233	5.82e-23	0.244	1.4e-23	-0.36	2.45e-29	-0.604	4.46e-37
Ile	-0.07	0.00295	0.16	7.63e-10	0.327	7.22e-19	0.011	1	0.23	3.78e-14	0.398	1.35e-21	0.081	0.000468	0.168	2.34e-10	-0.149	4.28e-09	-0.317	2.12e-18
Leu	-0.114	8.68e-09	0.18	4.3e-14	0.263	3.7e-19	0.027	0.541	0.294	1.03e-20	0.377	2.75e-24	0.141	3.93e-11	0.083	6.58e-06	-0.153	4.61e-12	-0.236	1.2e-17
Lys	-0.195	4.15e-07	0.534	4.19e-19	1.291	5.71e-32	0.112	0.00309	0.729	1.59e-23	1.486	4.47e-34	0.306	7.03e-12	0.757	4.41e-24	-0.422	6.54e-16	-1.179	1.29e-30
Met	0.077	1	4.739	2.04e-38	-0.569	4.62e-09	6.133	2.59e-42	4.662	3.62e-38	-0.647	1.94e-10	6.055	4.03e-42	-5.309	3.94e-40	1.393	2.49e-20	6.702	1.17e-43
Phe	0.158	2.57e-07	1.699	1.28e-39	2.935	6.64e-48	-0.045	0.487	1.541	3.78e-38	2.778	4.57e-47	-0.203	7.67e-10	1.237	7.86e-35	-1.744	5.13e-40	-2.981	3.9e-48
Pro	-0.172	1	4.867	1.77e-24	-0.926	6.41e-05	1.223	3.79e-07	5.039	5.48e-25	-0.754	0.00124	1.396	2.12e-08	-5.793	4.93e-27	-3.644	2.52e-20	2.15	2.86e-13
Ser	-1.304	1.46e-12	5.191	5.58e-32	-0.945	6.24e-09	2.609	7.21e-22	6.495	2.42e-35	0.359	0.0293	3.913	8.96e-28	-6.136	1.73e-34	-2.582	1.02e-21	3.554	2.35e-26
Thr	-1.057	8.08e-13	1.981	3.16e-21	-0.474	6.13e-05	1.986	2.9e-21	3.038	1.93e-27	0.583	1.48e-06	3.043	1.82e-27	-2.455	2.58e-24	0.005	1	2.46	2.41e-24
Trp	0.537	7.26e-13	2.464	1.79e-34	4.225	1.29e-42	-0.307	6.9e-07	1.927	8.62e-31	3.688	1.47e-40	-0.844	8.31e-19	1.761	1.87e-29	-2.771	3.06e-36	-4.532	1.12e-43
Tyr	0.12	1.13e-05	1.156	6.08e-35	2.461	2.3e-46	-0.033	1	1.035	2.74e-33	2.34	1.33e-45	-0.153	9.19e-08	1.305	9.1e-37	-1.189	2.29e-35	-2.494	1.44e-46
Val	-1.041	5.52e-08	4.341	1.76e-26	0.466	0.0156	4.104	1.17e-25	5.381	1.16e-29	1.507	5.29e-12	5.145	5.39e-29	-3.874	8.13e-25	-0.236	0.908	3.638	6.69e-24
