# Supplementary material for: Variation in ubiquitin system genes creates substrate-specific effects on proteasomal protein degradation
Source: eLife. 2022 Oct 11;11:e79570. doi: 10.7554/eLife.79570 (PMC9634822; doi:10.7554/eLife.79570)
Supplement: Figure 2—source data 1. — "chr" = chromosome, "LOD" = logarithm of the odds, "QTL_CI_left" = left index of QTL confidence interval, "QTL_peak" = peak position of QTL, "QTL_CI_right" = right index of QTL confidence interval. [file elife-79570-fig2-data1.xlsx]

## Sheet: Sheet1
N-degron	chr	LOD	delta_AF	QTL_CI_left	QTL_peak	QTL_CI_right
Ala	1	88.76	-0.448055	16650	37400	43300
Ala	2	6.705	0.086435	598100	635900	664300
Ala	4	15.37	0.1616	424950	456500	477850
Ala	5	52.935	0.32657	360100	376500	389100
Ala	7	12.34	-0.154895	98800	132350	164150
Ala	7	35.115	0.24047	381300	395050	417650
Ala	9	24.49	0.20963	275350	292050	314450
Ala	10	29.795	0.235905	311700	324900	344100
Ala	10	15.165	0.148645	582000	611300	637900
Ala	11	7.875	-0.11098	295300	358800	427100
Ala	12	6.285	0.114595	150700	187200	218750
Ala	12	85.695	-0.38252	645500	653600	665100
Ala	13	9.645	-0.16201	0	24650	58950
Ala	15	11.89	0.13817	346700	392500	429650
Ala	16	15.045	0.14788	178400	202400	222950
Arg	2	13.83	0.1358	518350	540400	592300
Arg	7	7.285	-0.11965	829050	861950	892350
Arg	10	19.015	0.17025	326500	344600	399900
Arg	10	9.17	0.0982	623700	655350	693300
Arg	11	5.365	-0.0955	248100	280150	325950
Arg	13	17.945	0.183	242450	262600	302700
Arg	15	18.46	-0.1761	138600	158950	187900
Asn	4	6.235	-0.09935	448100	511950	588850
Asn	7	6.775	-0.1369	0	14200	37850
Asn	7	6.815	0.0931	420750	483050	535050
Asn	7	7.56	-0.10905	839250	873900	905650
Asn	10	51.585	0.30635	538900	552400	561700
Asn	13	9.485	0.12155	268200	324850	357850
Asn	15	18.305	-0.1805	138600	171700	192750
Asp	2	6	0.0973	533900	599300	673350
Asp	4	10.255	-0.11415	336450	484450	525150
Asp	7	30.865	-0.2417	855600	873250	901800
Asp	8	10.04	0.1237	92100	122500	195050
Asp	12	16.29	0.17185	634450	653750	680250
Asp	13	14.78	0.1729	250650	279800	310000
Asp	14	166.93	0.56335	458700	467750	476050
Asp	15	16.215	-0.16895	124950	157050	175200
Cys	1	32.145	-0.2551	18500	45200	55500
Cys	5	14.655	0.1614	352550	371450	400350
Cys	7	8.265	-0.10875	99350	125850	169600
Cys	7	7.9	0.1164	345000	384000	420600
Cys	10	31.19	0.2401	321850	333150	351550
Cys	10	11.19	0.14125	588400	626100	660250
Cys	11	9.38	-0.08975	336800	372550	403200
Cys	12	55.05	-0.29505	645650	654300	675050
Cys	15	8.815	-0.0963	518550	569750	594650
Gln	4	6.88	-0.106305	0	93600	119150
Gln	10	28.17	0.179815	362900	400000	406900
Gln	10	38.6	0.264665	615850	633150	654850
Glu	4	8.82	-0.137985	0	51000	86450
Glu	12	10.505	0.112935	636800	665600	697400
Glu	13	8.145	0.11986	277100	307450	356550
Glu	15	7.76	-0.116595	138600	174500	198500
Gly	1	60.245	-0.36179	0	39350	44950
Gly	4	6.075	-0.07604	106800	133550	159500
Gly	5	47.575	0.262345	349900	360600	382800
Gly	7	7.225	-0.112255	106750	148550	192600
Gly	7	14.59	0.173165	382050	409450	437950
Gly	9	28.165	0.216785	267650	284700	303100
Gly	10	18.97	0.16833	319350	344050	369000
Gly	12	38.045	-0.243495	640950	651700	671500
Gly	16	6.175	0.087575	167350	211900	258900
His	4	7.35	-0.10975	11200	72500	101000
His	7	10.26	0.13975	841450	877700	904250
His	9	4.79	0.109	86300	129100	165050
His	11	16.025	0.15215	118750	156450	173600
His	12	6.425	0.0638	670700	727500	742700
His	13	16.945	0.17035	46750	75000	102950
His	13	22.73	0.1876	305700	322850	339850
His	14	25.96	-0.19935	444000	458750	474000
His	15	38.345	-0.2682	147500	157850	172250
Ile	12	5.545	0.0838	616600	649650	690250
Leu	7	27.585	0.2197	844350	862650	880150
Leu	14	18.285	-0.151	438550	458950	491250
Lys	2	12.99	0.1472	499850	548750	579750
Lys	8	6.72	0.0841	145650	174300	192300
Lys	9	5.4	0.0884	102800	132450	170950
Lys	10	23.175	0.1929	331250	353750	371200
Lys	13	25.815	0.23545	248000	279450	322550
Lys	14	44.705	-0.2534	453700	464800	477050
Lys	15	32.595	-0.2387	149500	167700	180300
Met	2	5.05	0.0922	524650	603800	690350
Met	12	20.76	-0.1721	638900	656650	680300
Met	14	15.38	-0.1648	453350	483600	522450
Met	15	17	-0.17275	138150	163350	178500
Phe	2	6.525	0.1075	402150	457400	549750
Phe	4	7.98	0.1294	348450	431900	485650
Phe	7	16.21	0.1652	390600	409700	448450
Phe	7	168	0.5628	864500	870950	877350
Phe	10	27.915	0.1742	315600	338900	371100
Phe	11	10.575	-0.14335	209250	267900	302900
Phe	12	81.77	-0.3636	647400	653450	660200
Phe	13	12.88	0.1198	16850	38050	52400
Phe	14	229.33	-0.61735	457200	463750	468450
Phe	15	13.175	-0.14075	93100	159800	193250
Pro	1	19.42	-0.2199	0	38150	50950
Pro	4	22.93	0.1979	432150	450750	489050
Pro	5	14.05	0.1374	337750	373550	427900
Pro	7	25.02	-0.20335	124800	144950	189100
Pro	7	32.255	0.21765	411500	424150	436750
Pro	9	7.57	0.11865	255900	294400	332550
Pro	10	21.135	0.15565	339800	353700	368800
Pro	12	10.215	0.1376	163700	206900	234950
Pro	12	11.92	-0.1345	638150	656750	689600
Pro	14	39.035	-0.25835	441450	459200	480400
Pro	15	6.89	0.08105	327750	368300	415100
Pro	16	7.29	0.0936	95650	138050	163750
Pro	16	24.505	-0.2202	375050	403350	428950
Ser	1	26.05	-0.321135	0	36750	66600
Ser	4	14.085	0.17641	396000	417850	450450
Ser	5	25	0.24358	362150	385550	407200
Ser	7	21.145	-0.21094	104950	124550	149500
Ser	7	29.39	0.246805	386450	405650	421500
Ser	9	13.375	0.1754	270500	293000	318450
Ser	10	13.29	0.16862	307750	335000	378650
Ser	12	22.275	-0.168965	680850	693400	703500
Ser	15	12.12	0.135125	528500	563850	602300
Thr	1	53.75	-0.389625	0	37100	48600
Thr	4	8.31	0.12358	372200	422500	469800
Thr	5	79.8	0.399635	365050	373750	384200
Thr	7	18.25	-0.173025	84150	111350	168600
Thr	7	30.9	0.24605	388150	404400	420600
Thr	9	51.84	0.292415	264600	285800	303750
Thr	11	8.815	-0.091615	365700	419550	484600
Thr	12	58.82	-0.314	647000	662800	675750
Thr	14	6.565	0.10824	440750	473950	532000
Thr	15	11.58	0.128925	354100	403350	449150
Thr	15	9.03	0.121195	521900	559200	581250
Thr	16	17.935	0.16621	203850	218600	241050
Trp	4	17.07	0.145	287150	373800	408600
Trp	7	9.25	0.12945	389250	421600	467200
Trp	7	219.545	0.66245	865350	870600	877800
Trp	10	15.1	0.1735	301200	320500	348800
Trp	12	35.57	-0.25335	635900	652900	671550
Trp	14	230.205	-0.6614	458750	466100	472450
Tyr	4	17.88	0.1587	259200	280800	316600
Tyr	7	5.845	0.0876	417950	450900	490650
Tyr	7	112.15	0.4593	864950	873000	879600
Tyr	8	6.04	-0.1014	50150	98050	127300
Tyr	10	13.32	0.1395	325000	351750	373050
Tyr	12	23.57	-0.1881	631450	644700	663300
Tyr	14	111.145	-0.42775	458850	468000	477250
Val	1	34.385	-0.27935	0	41850	54950
Val	5	28.69	0.2028	332300	363550	382200
Val	7	7.705	-0.12835	68450	141850	172400
Val	7	9.3	0.12095	376350	417100	468100
Val	9	15.53	0.1547	271850	299000	320200
Val	12	30.045	-0.2297	636800	649400	666100
Val	16	11.555	0.1114	184900	203200	223700
