# Supplementary material for: Variation in ubiquitin system genes creates substrate-specific effects on proteasomal protein degradation
Source: eLife. 2022 Oct 11;11:e79570. doi: 10.7554/eLife.79570 (PMC9634822; doi:10.7554/eLife.79570)
Supplement: Figure 2—source data 2. — "chr" = chromosome, "QTL_CI_left" = left index of QTL confidence interval, "QTL_peak" = peak position of QTL, "QTL_right_CI" = right index of QTL confidence interval, "LOD" = logarithm of the odds, "RM_AFD" = RM allele frequency difference between high and low UPS activity pools. [file elife-79570-fig2-data2.xlsx]

## Sheet: figure_02_source_data_02_unique
QTL	chr	QTL_CI_left	QTL_peak	QTL_CI_right	LOD	RM_AFD	N_N-degrons_Affected	N-degrons_Affected	Pathway-Specific (LOD 4.5)	Pathway-Specific (LOD 3.5)	Pathway-Specific (LOD 2.5)	N-degron-Specific (LOD 4.5)	N-degron-Specific (LOD 3.5)	N-degron-Specific (LOD 2.5)
chr_1_a	1	5021	39400	52122	45	-0.325	7	Ala, Cys, Gly, Pro, Ser, Thr, Val	Ac/N-end	Ac/N-end	Ac/N-end	no	no	no
chr_2_a	2	473450	515516	573934	11.1	0.13	3	Arg, Lys, Phe	Arg/N-end	Arg/N-end	no	no	no	no
chr_2_b	2	534970	585630	640010	8.9	0.112	5	Ala, Arg, Asp, Lys, Met	no	no	no	no	no	no
chr_4_a	4	29500	87662	116525	7.3	-0.108	4	Gln, Glu, Gly, His	no	no	no	no	no	no
chr_4_b	4	273175	327300	362600	17.5	0.152	2	Trp, Tyr	Arg/N-end	Arg/N-end	no	no	no	no
chr_4_c	4	376817	425550	463567	14.3	0.156	6	Ala, Phe, Pro, Ser, Thr, Trp	no	no	no	no	no	no
chr_4_d	4	392275	498200	557000	8.2	-0.107	2	Asn, Asp	Arg/N-end	Arg/N-end	Arg/N-end	no	no	no
chr_5_a	5	351400	372136	396250	37.5	0.248	7	Ala, Cys, Gly, Pro, Ser, Thr, Val	Ac/N-end	Ac/N-end	Ac/N-end	no	no	no
chr_7_a	7	42075	62775	103225	12.5	-0.155	2	Asn, Thr	no	no	no	no	no	no
chr_7_b	7	98178	132779	172279	14.3	-0.156	7	Ala, Cys, Gly, Pro, Ser, Thr, Val	Ac/N-end	no	no	no	no	no
chr_7_c	7	389941	418641	451318	18	0.167	11	Ala, Asn, Cys, Gly, Phe, Pro, Ser, Thr, Trp, Tyr, Val	no	no	no	no	no	no
chr_7_d	7	841300	869700	899934	15.2	-0.157	3	Arg, Asn, Asp	Arg/N-end	Arg/N-end	Arg/N-end	no	no	no
chr_7_e	7	856120	870980	883830	107.5	0.409	5	His, Leu, Phe, Trp, Tyr	Arg/N-end	Arg/N-end	Arg/N-end	no	no	no
chr_8_a	8	50150	98050	127300	6	-0.101	1	Tyr	Arg/N-end	Arg/N-end	Arg/N-end	Tyr	Tyr	Tyr
chr_8_b	8	118875	148400	193675	8.4	0.104	2	Asp, Lys	Arg/N-end	Arg/N-end	Arg/N-end	no	no	no
chr_9_a	9	94550	130775	168000	5.1	0.099	2	His, Lys	Arg/N-end	Arg/N-end	Arg/N-end	no	no	no
chr_9_b	9	267641	291492	315417	23.5	0.195	6	Ala, Gly, Pro, Ser, Thr, Val	Ac/N-end	Ac/N-end	Ac/N-end	no	no	no
chr_10_a	10	323900	345482	371186	21.9	0.182	11	Ala, Arg, Cys, Gln, Gly, Lys, Phe, Pro, Ser, Trp, Tyr	no	no	no	no	no	no
chr_10_b	10	589770	615660	641600	25.1	0.192	5	Ala, Arg, Asn, Cys, Gln	no	no	no	no	no	no
chr_11_a	11	118750	156450	173600	16	0.152	1	His	Arg/N-end	Arg/N-end	Arg/N-end	His	no	no
chr_11_b	11	291030	339790	388750	8.4	-0.106	5	Ala, Arg, Cys, Phe, Thr	no	no	no	no	no	no
chr_12_a	12	157200	197050	226850	8.2	0.126	2	Ala, Pro	Ac/N-end	no	no	no	no	no
chr_12_b	12	644414	657241	674723	42.1	-0.25	11	Ala, Cys, Gly, Met, Phe, Pro, Ser, Thr, Trp, Tyr, Val	no	no	no	no	no	no
chr_12_c	12	639637	674125	702650	9.7	0.108	4	Asp, Gly, His, Ile	Arg/N-end	Arg/N-end	Arg/N-end	no	no	no
chr_13_a	13	0	24650	58950	9.6	-0.162	1	Ala	Ac/N-end	Ac/N-end	no	Ala	no	no
chr_13_b	13	31800	56525	77675	14.9	0.145	2	His, Phe	Arg/N-end	Arg/N-end	Arg/N-end	no	no	no
chr_13_c	13	265350	296167	331584	16.5	0.17	6	Arg, Asn, Asp, Glu, His, Lys	Arg/N-end	no	no	no	no	no
chr_14_a	14	450731	465394	482912	89.3	-0.342	8	His, Leu, Lys, Met, Phe, Pro, Trp, Tyr	no	no	no	no	no	no
chr_14_b	14	449725	470850	504025	86.7	0.336	2	Asp, Thr	no	no	no	no	no	no
chr_15_a	15	133625	163862	184831	20.2	-0.183	8	Arg, Asn, Asp, Glu, His, Lys, Met, Phe	no	no	no	no	no	no
chr_15_b	15	342850	388050	431300	10.1	0.116	3	Ala, Pro, Thr	Ac/N-end	no	no	no	no	no
chr_15_c	15	525200	561525	591775	10.6	0.128	2	Ser, Thr	Ac/N-end	Ac/N-end	Ac/N-end	no	no	no
chr_15_d	15	518550	569750	594650	8.8	-0.096	1	Cys	Ac/N-end	Ac/N-end	Ac/N-end	Cys	Cys	Cys
chr_16_a	16	166030	194830	222070	11.6	0.121	5	Ala, Gly, Pro, Thr, Val	Ac/N-end	Ac/N-end	Ac/N-end	no	no	no
chr_16_b	16	375050	403350	428950	24.5	-0.22	1	Pro	Ac/N-end	Ac/N-end	Ac/N-end	Pro	Pro	Pro
