# Supplementary material for: Variation in ubiquitin system genes creates substrate-specific effects on proteasomal protein degradation
Source: eLife. 2022 Oct 11;11:e79570. doi: 10.7554/eLife.79570 (PMC9634822; doi:10.7554/eLife.79570)
Supplement: Figure 5—source data 1. [file elife-79570-fig5-data1.xlsx]

## Sheet: Sheet1
geneID	protein_name	fold_change	log2_fold_change	padj	log10_padj
YLR417W	VPS36	0.304229	-1.71677	3.243e-14	13.4891
YLR327C	TMA10	1.8622	0.897006	1.01691e-07	6.99272
YMR303C	ADH2	0.662252	-0.594549	0.000241354	3.61735
YPL252C	YAH1	1.5949	0.673463	0.00216595	2.66435
YNL253W	TEX1	0.682594	-0.550901	0.0141457	1.84937
YBR005W	RCR1	1.49925	0.584241	0.0141457	1.84937
YBR072W	HSP26	0.734214	-0.445727	0.0141457	1.84937
YNL117W	MLS1	0.685871	-0.543991	0.0141457	1.84937
YLR174W	IDP2	0.714286	-0.485427	0.0141457	1.84937
YNL208W		1.321	0.401635	0.0142541	1.84606
YLR286C	CTS1	1.33869	0.42082	0.0172666	1.76279
YDL005C	MED2	1.58983	0.668868	0.0199487	1.70009
YNL100W	MIC27	0.652742	-0.615416	0.0199487	1.70009
YOR132W	VPS17	1.65563	0.72738	0.0199487	1.70009
YNL259C	ATX1	1.30548	0.384584	0.0303272	1.51817
YDR045C	RPC11	1.33869	0.42082	0.0331574	1.47942
YNR034W-A		1.28535	0.362158	0.0390486	1.40839
YKL096W	CWP1	1.29534	0.373327	0.0457076	1.34001
YPR075C	OPY2	1.45773	0.54372	0.0457076	1.34001
YOR236W	DFR1	1.36986	0.454032	0.0457076	1.34001
YIR009W	MSL1	1.46843	0.554273	0.0457076	1.34001
YJR091C	JSN1	1.29534	0.373327	0.0457076	1.34001
YBL059C-A	CMC2	1.42045	0.506353	0.0457076	1.34001
YER180C-A	SLO1	1.29199	0.369595	0.0485988	1.31337
YDL207W	GLE1	0.668896	-0.580145	0.0594261	1.22602
YGR184C	UBR1	0.76746	-0.381837	0.0594261	1.22602
YPR107C	YTH1	1.37363	0.45799	0.0627178	1.20261
YAL061W	BDH2	1.4556	0.541618	0.0627178	1.20261
YAL044W-A	BOL1	1.27714	0.352916	0.069289	1.15934
YGL150C	INO80	0.739098	-0.436162	0.0694407	1.15839
YDL188C	PPH22	0.745156	-0.424385	0.0711524	1.14781
YER182W	FMP10	1.30548	0.384584	0.0736977	1.13255
YIL036W	CST6	1.26743	0.341903	0.0769391	1.11385
YDR055W	PST1	1.27065	0.345564	0.0802668	1.09546
YKL087C	CYT2	1.41844	0.504305	0.0816734	1.08792
YDR513W	GRX2	1.24844	0.320126	0.0841149	1.07513
YHR057C	CPR2	1.24844	0.320126	0.0841297	1.07505
YIL019W	FAF1	1.41643	0.50226	0.0841297	1.07505
YHR087W	RTC3	1.24378	0.314733	0.0888287	1.05145
YDR156W	RPA14	1.23153	0.300448	0.138018	0.860064
YCL035C	GRX1	1.23153	0.300448	0.138018	0.860064
YJL174W	KRE9	1.31579	0.395929	0.139544	0.855287
YCL001W	RER1	0.750188	-0.414677	0.140462	0.85244
YMR273C	ZDS1	1.27714	0.352916	0.144404	0.840421
YBR091C	TIM12	1.26904	0.343732	0.144404	0.840421
YDL160C-A	MHF2	1.38122	0.465938	0.144404	0.840421
YDL110C	TMA17	1.22699	0.295128	0.144404	0.840421
YKR042W	UTH1	1.37931	0.463947	0.144679	0.839593
YGR278W	CWC22	0.735294	-0.443607	0.173795	0.759963
YMR037C	MSN2	1.29032	0.367732	0.173795	0.759963
YNL004W	HRB1	1.39082	0.475936	0.17883	0.74756
YOR210W	RPB10	1.21803	0.284546	0.185994	0.730501
YCL059C	KRR1	0.798085	-0.325386	0.190774	0.719481
YGR080W	TWF1	1.25471	0.327348	0.194926	0.71013
YLR131C	ACE2	1.3986	0.483985	0.194926	0.71013
YCR072C	RSA4	0.780031	-0.358396	0.194926	0.71013
YLR179C		1.21359	0.279284	0.194926	0.71013
YJL158C	CIS3	1.21212	0.277534	0.194926	0.71013
YCR075W-A		1.23001	0.298673	0.194926	0.71013
YOR122C	PFY1	1.20919	0.274041	0.217675	0.662192
YCL064C	CHA1	0.789266	-0.341417	0.217675	0.662192
YGL041W-A		1.20773	0.272297	0.217675	0.662192
YDL085C-A		1.22399	0.291592	0.217675	0.662192
YLR147C	SMD3	1.20773	0.272297	0.221073	0.655465
YDL230W	PTP1	1.24844	0.320126	0.221774	0.654089
YGR111W		0.784314	-0.350497	0.221774	0.654089
YCL011C	GBP2	0.758725	-0.39835	0.23503	0.628876
YPL221W	FLC1	1.35501	0.438307	0.23503	0.628876
YER058W	PET117	1.38696	0.471929	0.237565	0.624217
YNL113W	RPC19	1.20192	0.265345	0.246023	0.609024
YNL135C	FPR1	1.20048	0.263612	0.249314	0.603254
YOL100W	PKH2	1.36986	0.454032	0.249314	0.603254
YKL146W	AVT3	1.37931	0.463947	0.250043	0.601986
YDR424C	DYN2	1.19617	0.258425	0.277768	0.556317
YOR265W	RBL2	1.19617	0.258425	0.281977	0.549786
YDR487C	RIB3	1.19474	0.2567	0.287821	0.540878
YML096W		0.791139	-0.337996	0.288397	0.540009
YKL164C	PIR1	1.22549	0.293359	0.288397	0.540009
YIL103W	DPH1	0.737463	-0.439357	0.289979	0.537633
YDR486C	VPS60	1.21065	0.275786	0.291241	0.535747
YML058W	SML1	1.18906	0.249822	0.292126	0.53443
YDR284C	DPP1	0.773395	-0.370722	0.292126	0.53443
YER047C	SAP1	0.779423	-0.359521	0.292126	0.53443
YHR165C	PRP8	0.798085	-0.325386	0.292126	0.53443
YKR002W	PAP1	0.800641	-0.320773	0.292126	0.53443
YIL044C	AGE2	1.23153	0.300448	0.292126	0.53443
YKR014C	YPT52	1.18906	0.249822	0.292126	0.53443
YAL046C	BOL3	1.1919	0.253257	0.292126	0.53443
YIL131C	FKH1	0.71736	-0.479231	0.292126	0.53443
YOR257W	CDC31	1.18906	0.249822	0.292126	0.53443
YBR242W		0.76746	-0.381837	0.292126	0.53443
YJR059W	PTK2	1.28866	0.365871	0.292126	0.53443
YDR169C	STB3	1.35685	0.440263	0.292126	0.53443
YLR057W	MNL2	1.2285	0.296899	0.300555	0.522076
YJL159W	HSP150	1.18483	0.244685	0.312844	0.504672
YIR003W	AIM21	1.21951	0.286304	0.312844	0.504672
YFR030W	MET10	0.802568	-0.317304	0.313304	0.504034
YLR211C	ATG38	1.25471	0.327348	0.313304	0.504034
YJR025C	BNA1	1.18343	0.242977	0.318139	0.497382
YHL018W		1.27877	0.354759	0.320787	0.493783
YAL062W	GDH3	0.777605	-0.362891	0.320787	0.493783
YGR245C	SDA1	0.815661	-0.293959	0.320787	0.493783
YKR038C	KAE1	0.794913	-0.331132	0.320787	0.493783
YNR046W	TRM112	1.18203	0.24127	0.320787	0.493783
YMR243C	ZRC1	0.792393	-0.335712	0.321629	0.492645
YDR422C	SIP1	1.21507	0.281036	0.321629	0.492645
YLR029C	RPL15A	0.823723	-0.279768	0.321629	0.492645
YDR368W	YPR1	1.17925	0.237864	0.321629	0.492645
YLR430W	SEN1	0.815661	-0.293959	0.321629	0.492645
YGR152C	RSR1	1.24069	0.311148	0.321629	0.492645
YGR037C	ACB1	1.18064	0.239566	0.321629	0.492645
YBR202W	MCM7	0.745156	-0.424385	0.321629	0.492645
YMR173W	DDR48	1.18064	0.239566	0.321629	0.492645
YBL025W	RRN10	1.32626	0.407364	0.325982	0.486806
YOL124C	TRM11	0.784314	-0.350497	0.332335	0.478424
YIR004W	DJP1	1.19474	0.2567	0.342404	0.465461
YMR220W	ERG8	0.784929	-0.349365	0.343476	0.464104
YHR137W	ARO9	0.799361	-0.323082	0.343476	0.464104
YDL081C	RPP1A	1.17509	0.232769	0.347581	0.458944
YAL042W	ERV46	0.819001	-0.288063	0.350421	0.45541
YOR377W	ATF1	1.27226	0.347399	0.365348	0.437293
YMR193W	MRPL24	0.800641	-0.320773	0.365348	0.437293
YOL109W	ZEO1	1.17233	0.229382	0.365348	0.437293
YPL150W		1.3624	0.446148	0.371519	0.430019
YMR174C	PAI3	1.17096	0.227692	0.372847	0.428469
YDR086C	SSS1	1.17096	0.227692	0.378184	0.422297
YDR511W	SDH7	1.18064	0.239566	0.381695	0.418283
YJR097W	JJJ3	1.18343	0.242977	0.381695	0.418283
YKL213C	DOA1	0.779423	-0.359521	0.38372	0.415986
YLR196W	PWP1	0.824402	-0.27858	0.38372	0.415986
YJR095W	SFC1	0.762195	-0.391768	0.38372	0.415986
YIL047C	SYG1	0.823723	-0.279768	0.38372	0.415986
YJR112W	NNF1	1.18483	0.244685	0.38372	0.415986
YDR167W	TAF10	1.18203	0.24127	0.38372	0.415986
YNL263C	YIF1	1.30208	0.380822	0.38372	0.415986
YBR288C	APM3	0.814332	-0.296311	0.384546	0.415052
YNL166C	BNI5	1.16959	0.226004	0.384546	0.415052
YLR257W		1.16686	0.222633	0.390803	0.408042
YPR180W	AOS1	0.778816	-0.360645	0.390803	0.408042
YPL049C	DIG1	0.813008	-0.298658	0.390803	0.408042
YBL001C	ECM15	1.1655	0.22095	0.400346	0.397565
YGR158C	MTR3	0.796813	-0.327687	0.400346	0.397565
YER166W	DNF1	0.819672	-0.286881	0.401255	0.39658
YMR117C	SPC24	1.17371	0.231075	0.401255	0.39658
YIL021W	RPB3	1.17925	0.237864	0.401255	0.39658
YJL131C	AIM23	0.798085	-0.325386	0.401255	0.39658
YOR155C	ISN1	0.789266	-0.341417	0.401255	0.39658
YER183C	FAU1	1.3459	0.428566	0.403224	0.394453
YGL242C		1.17233	0.229382	0.404466	0.393118
YOL087C	DUF1	1.31579	0.395929	0.404466	0.393118
YNL163C	RIA1	0.821693	-0.283329	0.404721	0.392844
YGR009C	SEC9	1.17647	0.234465	0.406963	0.390445
YKL184W	SPE1	0.8285	-0.271426	0.408067	0.389268
YHR207C	SET5	0.809061	-0.305679	0.413281	0.383755
YDR031W	MIX14	1.16144	0.215915	0.421983	0.374705
YCR020W-B	HTL1	1.16144	0.215915	0.422123	0.374561
YDR051C	DET1	0.819672	-0.286881	0.426043	0.370547
YKR095W-A	PCC1	1.16144	0.215915	0.426043	0.370547
YPL270W	MDL2	0.793651	-0.333424	0.428588	0.36796
YDL235C	YPD1	1.15741	0.210897	0.428588	0.36796
YDR016C	DAD1	1.15741	0.210897	0.428588	0.36796
YNL244C	SUI1	1.16009	0.21424	0.428588	0.36796
YOR267C	HRK1	1.18906	0.249822	0.428588	0.36796
YBR111W-A	SUS1	1.15741	0.210897	0.428588	0.36796
YGL250W	RMR1	1.25471	0.327348	0.428588	0.36796
YIR037W	HYR1	1.15875	0.212568	0.428588	0.36796
YBR077C	SLM4	1.16009	0.21424	0.428588	0.36796
YGR038W	ORM1	0.801282	-0.319618	0.428588	0.36796
YJL179W	PFD1	1.16009	0.21424	0.428588	0.36796
YDR107C	TMN2	1.16822	0.224317	0.428588	0.36796
YLR167W	RPS31	1.15875	0.212568	0.428588	0.36796
YPR168W	NUT2	1.23305	0.302226	0.428588	0.36796
YCR060W	TAH1	1.17096	0.227692	0.428588	0.36796
YPR139C	LOA1	0.81103	-0.302173	0.428588	0.36796
YFL009W	CDC4	1.3369	0.41889	0.428906	0.367638
YBR257W	POP4	0.781861	-0.355016	0.42917	0.36737
YLR262C-A	TMA7	1.15607	0.209228	0.42917	0.36737
YJL133C-A		1.20482	0.268817	0.42917	0.36737
YGR113W	DAM1	0.796813	-0.327687	0.42917	0.36737
YOR163W	DDP1	1.16822	0.224317	0.42917	0.36737
YGL101W	YGK1	0.823045	-0.280956	0.42917	0.36737
YHR006W	STP2	1.19048	0.251539	0.42917	0.36737
YCL033C	MXR2	1.17371	0.231075	0.42917	0.36737
YDR088C	SLU7	1.221	0.288065	0.42917	0.36737
YHR179W	OYE2	1.15473	0.207561	0.431352	0.365168
YPR018W	RLF2	1.31406	0.394032	0.431352	0.365168
YER062C	GPP2	1.15473	0.207561	0.431352	0.365168
YGR274C	TAF1	1.19332	0.254978	0.433691	0.362819
YBL006C	LDB7	1.23916	0.309359	0.433691	0.362819
YIL125W	KGD1	0.841043	-0.249749	0.434471	0.362039
YMR312W	ELP6	0.798085	-0.325386	0.440373	0.35618
YML131W		0.81103	-0.302173	0.440373	0.35618
YBR093C	PHO5	1.16009	0.21424	0.440373	0.35618
YNL068C	FKH2	1.18343	0.242977	0.440373	0.35618
YOR020C	HSP10	1.15075	0.202572	0.450098	0.346693
YGL211W	NCS6	0.762195	-0.391768	0.450098	0.346693
YCR092C	MSH3	1.28205	0.358454	0.450098	0.346693
YMR222C	FSH2	1.18765	0.248108	0.450098	0.346693
YPL134C	ODC1	0.766284	-0.38405	0.450098	0.346693
YMR196W		1.27065	0.345564	0.450098	0.346693
YIL070C	MAM33	1.15207	0.204233	0.450098	0.346693
YPL266W	DIM1	0.83612	-0.258217	0.450098	0.346693
YBL023C	MCM2	0.827815	-0.27262	0.450098	0.346693
YGR074W	SMD1	1.17371	0.231075	0.450098	0.346693
YOR286W	RDL2	1.15075	0.202572	0.450098	0.346693
YOL027C	MDM38	0.843882	-0.244887	0.450098	0.346693
YPR171W	BSP1	1.23305	0.302226	0.45246	0.344419
YOR020W-A		1.14811	0.199255	0.45246	0.344419
YPR026W	ATH1	1.26422	0.33825	0.45246	0.344419
YJR024C	MDE1	1.1976	0.260152	0.45246	0.344419
YKL062W	MSN4	1.16144	0.215915	0.45246	0.344419
YCR034W	ELO2	0.786164	-0.347099	0.45246	0.344419
YJL065C	DLS1	1.22549	0.293359	0.45246	0.344419
YHR039C-A	VMA10	1.14943	0.200913	0.45246	0.344419
YML081W	TDA9	0.778816	-0.360645	0.45246	0.344419
YDR415C		1.18203	0.24127	0.45246	0.344419
YJR104C	SOD1	1.14943	0.200913	0.45246	0.344419
YIL085C	KTR7	0.783085	-0.352759	0.45246	0.344419
YDR454C	GUK1	1.14811	0.199255	0.45246	0.344419
YMR305C	SCW10	1.14943	0.200913	0.45246	0.344419
YLR306W	UBC12	1.16009	0.21424	0.45246	0.344419
YNL050C		1.15875	0.212568	0.45246	0.344419
YBR264C	YPT10	1.18343	0.242977	0.455167	0.341829
YER141W	COX15	0.821693	-0.283329	0.457556	0.339556
YHR191C	CTF8	1.15607	0.209228	0.457556	0.339556
YDR301W	CFT1	1.2285	0.296899	0.458056	0.339082
YJL184W	GON7	1.14679	0.1976	0.458056	0.339082
YGR068C	ART5	0.802568	-0.317304	0.459086	0.338106
YJR003C	MRX12	0.763359	-0.389567	0.459086	0.338106
YOR040W	GLO4	1.15741	0.210897	0.459086	0.338106
YPL249C	GYP5	0.831255	-0.266637	0.459086	0.338106
YOL031C	SIL1	1.1534	0.205896	0.459086	0.338106
YLR182W	SWI6	1.19474	0.2567	0.459086	0.338106
YGR076C	MRPL25	1.29534	0.373327	0.459086	0.338106
YPL170W	DAP1	1.14548	0.195946	0.459086	0.338106
YHR138C		1.15473	0.207561	0.459086	0.338106
YKL209C	STE6	0.810373	-0.303342	0.459086	0.338106
YJL172W	CPS1	1.19474	0.2567	0.459086	0.338106
YGR258C	RAD2	1.28866	0.365871	0.459086	0.338106
YDR351W	SBE2	1.22399	0.291592	0.459086	0.338106
YGR092W	DBF2	0.83612	-0.258217	0.459086	0.338106
YOL010W	RCL1	1.24069	0.311148	0.459086	0.338106
YGR277C	CAB4	0.816993	-0.291604	0.459086	0.338106
YLR201C	COQ9	0.787402	-0.344828	0.459086	0.338106
YMR086W	SEG1	1.25313	0.325539	0.459086	0.338106
YDR287W	INM2	1.20337	0.26708	0.459086	0.338106
YHL009C	YAP3	1.15607	0.209228	0.459086	0.338106
YER050C	RSM18	0.82713	-0.273814	0.459086	0.338106
YPL112C	PEX25	0.846024	-0.24123	0.459086	0.338106
YIR023W	DAL81	1.19904	0.261881	0.459086	0.338106
YKL189W	HYM1	0.761035	-0.393965	0.459086	0.338106
YOR106W	VAM3	1.28535	0.362158	0.459086	0.338106
YER042W	MXR1	1.14548	0.195946	0.459086	0.338106
YPR154W	PIN3	1.14286	0.192645	0.459086	0.338106
YNL003C	PET8	0.786164	-0.347099	0.459086	0.338106
YAL060W	BDH1	0.847458	-0.238787	0.459086	0.338106
YJR019C	TES1	0.81367	-0.297485	0.459086	0.338106
YLR199C	PBA1	1.15875	0.212568	0.459086	0.338106
YKL086W	SRX1	1.287	0.364013	0.459086	0.338106
YIL117C	PRM5	1.29032	0.367732	0.459086	0.338106
YDL002C	NHP10	1.16686	0.222633	0.459086	0.338106
YHR163W	SOL3	1.14679	0.1976	0.459086	0.338106
YLR085C	ARP6	1.26422	0.33825	0.459086	0.338106
YHR045W		0.796178	-0.328836	0.462555	0.334837
YER146W	LSM5	1.14155	0.190997	0.462555	0.334837
YKR081C	RPF2	0.766871	-0.382944	0.464297	0.333204
YEL038W	UTR4	1.14155	0.190997	0.465632	0.331958
YHR077C	NMD2	0.805153	-0.312665	0.466814	0.330856
YIL147C	SLN1	1.24844	0.320126	0.471	0.326979
YMR104C	YPK2	0.780031	-0.358396	0.472004	0.326055
YEL056W	HAT2	1.19904	0.261881	0.474871	0.323424
YNL264C	PDR17	0.771605	-0.374066	0.481763	0.317167
YIL002W-A		1.13895	0.187707	0.481763	0.317167
YJL050W	MTR4	0.852515	-0.230203	0.481763	0.317167
YKL192C	ACP1	1.13895	0.187707	0.481763	0.317167
YGL087C	MMS2	1.13895	0.187707	0.485125	0.314146
YKR099W	BAS1	0.770416	-0.37629	0.485125	0.314146
YDR226W	ADK1	1.13895	0.187707	0.485125	0.314146
YGR179C	OKP1	1.20627	0.270556	0.485125	0.314146
YDR164C	SEC1	0.82713	-0.273814	0.485125	0.314146
YER177W	BMH1	1.14025	0.189351	0.489101	0.310601
YBR006W	UGA2	0.815661	-0.293959	0.489101	0.310601
YBR212W	NGR1	1.26263	0.336428	0.491872	0.308148
YDL209C	CWC2	1.28205	0.358454	0.491872	0.308148
YBR084C-A	RPL19B	0.853971	-0.227741	0.491872	0.308148
YDR382W	RPP2B	1.13766	0.186065	0.491872	0.308148
YPR055W	SEC8	0.819001	-0.288063	0.491872	0.308148
YJL082W	IML2	1.14548	0.195946	0.493346	0.306849
YPL233W	NSL1	1.16414	0.21927	0.493633	0.306596
YCR083W	TRX3	1.13636	0.184425	0.493905	0.306357
YLR408C	BLS1	1.20048	0.263612	0.493905	0.306357
YER159C	BUR6	1.13636	0.184425	0.493905	0.306357
YDL189W	RBS1	1.16959	0.226004	0.494978	0.305414
YJL081C	ARP4	0.849618	-0.235114	0.502746	0.298651
YDL128W	VCX1	1.21803	0.284546	0.502975	0.298454
YPL068C		1.17647	0.234465	0.503328	0.298149
YFL059W	SNZ3	0.829876	-0.269033	0.503328	0.298149
YLR132C	USB1	0.796178	-0.328836	0.503328	0.298149
YPL245W		0.848896	-0.23634	0.503328	0.298149
YBR269C	SDH8	1.14416	0.194295	0.503328	0.298149
YMR028W	TAP42	1.28205	0.358454	0.503328	0.298149
YFR011C	MIC19	1.13507	0.182786	0.503328	0.298149
YKL024C	URA6	1.13379	0.181149	0.505019	0.296692
YFL021W	GAT1	1.1976	0.260152	0.505019	0.296692
YNL079C	TPM1	1.13379	0.181149	0.505019	0.296692
YKL129C	MYO3	1.28535	0.362158	0.508185	0.293978
YHR156C	LIN1	1.21212	0.277534	0.508185	0.293978
YNL131W	TOM22	1.13379	0.181149	0.510412	0.292079
YDR079C-A	TFB5	1.15875	0.212568	0.512023	0.29071
YJR001W	AVT1	1.16686	0.222633	0.512888	0.289978
YGR275W	RTT102	1.1325	0.179515	0.512888	0.289978
YAL014C	SYN8	1.14416	0.194295	0.512888	0.289978
YIL027C	EMC5	1.17647	0.234465	0.512888	0.289978
YBL026W	LSM2	1.1325	0.179515	0.512888	0.289978
YER092W	IES5	1.14416	0.194295	0.512888	0.289978
YNL074C	MLF3	1.1919	0.253257	0.512888	0.289978
YFR036W	CDC26	1.15875	0.212568	0.512888	0.289978
YDR320C-A	DAD4	1.19904	0.261881	0.512888	0.289978
YOR285W	RDL1	1.13122	0.177882	0.519437	0.284467
YKL028W	TFA1	1.14025	0.189351	0.519437	0.284467
YBR129C	OPY1	0.792393	-0.335712	0.519437	0.284467
YPL236C	ENV7	1.23457	0.304006	0.519437	0.284467
YNL181W		1.16959	0.226004	0.519437	0.284467
YDR272W	GLO2	1.13122	0.177882	0.519437	0.284467
YJL044C	GYP6	0.794281	-0.332278	0.520145	0.283875
YOL058W	ARG1	1.12994	0.176251	0.520145	0.283875
YOR052C	TMC1	1.28041	0.356606	0.520145	0.283875
YDR408C	ADE8	1.13895	0.187707	0.5224	0.281997
YDL046W	NPC2	1.12994	0.176251	0.525127	0.279736
YKL217W	JEN1	1.23609	0.305788	0.525135	0.279729
YGR209C	TRX2	1.12867	0.174621	0.525135	0.279729
YPR187W	RPO26	1.12994	0.176251	0.525135	0.279729
YMR078C	CTF18	1.18906	0.249822	0.525135	0.279729
YHR043C	DOG2	1.12994	0.176251	0.525135	0.279729
Q0045	COX1	0.818331	-0.289244	0.525135	0.279729
YBR085C-A		1.12867	0.174621	0.527649	0.277655
YJL068C		0.849618	-0.235114	0.530508	0.275308
YBR057C	MUM2	1.15875	0.212568	0.530508	0.275308
YDR041W	RSM10	1.14943	0.200913	0.530508	0.275308
YDL147W	RPN5	0.861326	-0.215368	0.530508	0.275308
YNL039W	BDP1	1.15741	0.210897	0.530508	0.275308
YLR043C	TRX1	1.1274	0.172994	0.530508	0.275308
YPL271W	ATP15	1.12867	0.174621	0.530508	0.275308
YMR112C	MED11	1.12867	0.174621	0.530508	0.275308
YNR067C	DSE4	1.1274	0.172994	0.530508	0.275308
YMR077C	VPS20	1.26904	0.343732	0.530508	0.275308
YDR367W	KEI1	1.22399	0.291592	0.530508	0.275308
YLR118C		1.14155	0.190997	0.530508	0.275308
YOR220W	RCN2	1.12867	0.174621	0.530508	0.275308
YLL008W	DRS1	0.861326	-0.215368	0.532188	0.273935
YDR246W	TRS23	0.84246	-0.24732	0.540962	0.266833
YLR021W	IRC25	1.19904	0.261881	0.542577	0.265539
YNL015W	PBI2	1.12613	0.171368	0.542577	0.265539
YNL095C		1.20048	0.263612	0.544447	0.264045
YML007W	YAP1	1.12486	0.169745	0.544447	0.264045
YEL026W	SNU13	1.12486	0.169745	0.544447	0.264045
YML078W	CPR3	1.12486	0.169745	0.544447	0.264045
YJR082C	EAF6	1.12613	0.171368	0.544447	0.264045
YOR287C	RRP36	1.17925	0.237864	0.544447	0.264045
YDR121W	DPB4	1.12486	0.169745	0.544447	0.264045
YBR022W	POA1	1.13379	0.181149	0.544447	0.264045
YML046W	PRP39	0.788022	-0.343692	0.547767	0.261404
YAL032C	PRP45	1.15741	0.210897	0.548784	0.260598
YER120W	SCS2	1.1274	0.172994	0.549041	0.260396
YDR470C	UGO1	0.816993	-0.291604	0.549359	0.260144
YNL232W	CSL4	0.805802	-0.311503	0.549986	0.259648
YGR145W	ENP2	0.864304	-0.210389	0.551016	0.258836
YGR167W	CLC1	1.1236	0.168123	0.551016	0.258836
YOR232W	MGE1	1.12233	0.166503	0.56293	0.249546
YER026C	CHO1	0.853242	-0.228973	0.56293	0.249546
YDL099W	BUG1	1.13507	0.182786	0.56293	0.249546
YGR248W	SOL4	1.26582	0.340075	0.563605	0.249025
YHR094C	HXT1	1.13766	0.186065	0.566415	0.246865
YJR067C	YAE1	1.12108	0.164884	0.566415	0.246865
YIL169C	CSS1	1.20773	0.272297	0.566415	0.246865
YEL034W	HYP2	1.12108	0.164884	0.566415	0.246865
YER071C	TDA2	1.12233	0.166503	0.566415	0.246865
YHR154W	RTT107	0.851064	-0.232661	0.566415	0.246865
YGR020C	VMA7	1.12108	0.164884	0.566415	0.246865
YEL063C	CAN1	1.14679	0.1976	0.566415	0.246865
YFL042C	LAM5	0.803859	-0.314986	0.566415	0.246865
YBR176W	ECM31	0.798085	-0.325386	0.566415	0.246865
YDR122W	KIN1	1.18906	0.249822	0.566415	0.246865
YDL070W	BDF2	1.15607	0.209228	0.566415	0.246865
YBL002W	HTB2	1.12994	0.176251	0.566415	0.246865
YJR011C		0.820345	-0.285698	0.566415	0.246865
YGL106W	MLC1	1.12108	0.164884	0.566415	0.246865
YPL032C	SVL3	0.843882	-0.244887	0.567883	0.245741
YGR156W	PTI1	1.16144	0.215915	0.567883	0.245741
YAL025C	MAK16	0.837521	-0.255803	0.567883	0.245741
YHR078W		0.791766	-0.336855	0.567883	0.245741
YMR074C		1.11982	0.163268	0.57039	0.243828
YOR123C	LEO1	1.13379	0.181149	0.572407	0.242295
YDR200C	VPS64	1.14943	0.200913	0.573181	0.241709
YBR082C	UBC4	1.11857	0.161653	0.573883	0.241177
YOR109W	INP53	0.862813	-0.212881	0.576111	0.239494
YNL155W	CUZ1	0.838926	-0.253384	0.586163	0.231982
YLR312W-A	MRPL15	1.14548	0.195946	0.586788	0.231519
YPR129W	SCD6	1.11857	0.161653	0.586973	0.231382
YPL196W	OXR1	1.1919	0.253257	0.590799	0.22856
YML057W	CMP2	0.859845	-0.217851	0.592096	0.227608
YNL268W	LYP1	1.20192	0.265345	0.592955	0.226978
YKL085W	MDH1	0.86881	-0.202888	0.592955	0.226978
YBR087W	RFC5	0.862813	-0.212881	0.592955	0.226978
YPR165W	RHO1	0.856898	-0.222805	0.592955	0.226978
YKL033W-A		1.11732	0.16004	0.593144	0.22684
YDR308C	SRB7	1.11732	0.16004	0.593144	0.22684
YDL130W	RPP1B	1.11732	0.16004	0.595269	0.225287
YNR074C	AIF1	1.23762	0.307573	0.596957	0.224057
YER176W	ECM32	0.85034	-0.233888	0.596957	0.224057
YLR401C	DUS3	0.862813	-0.212881	0.596957	0.224057
YDR316W	OMS1	1.20919	0.274041	0.596957	0.224057
YBR130C	SHE3	1.11732	0.16004	0.596957	0.224057
YKL001C	MET14	1.15741	0.210897	0.598891	0.222652
YHR199C-A	NBL1	1.12108	0.164884	0.601798	0.220549
YCR082W	AHC2	1.1534	0.205896	0.601798	0.220549
YDL224C	WHI4	1.16009	0.21424	0.601798	0.220549
YDR155C	CPR1	1.11483	0.15682	0.601798	0.220549
YKL082C	RRP14	0.86881	-0.202888	0.601798	0.220549
YAL044C	GCV3	1.11607	0.158429	0.601798	0.220549
YLR364W	GRX8	1.1274	0.172994	0.601798	0.220549
YIL136W	OM45	0.87108	-0.199123	0.601798	0.220549
YKL138C	MRPL31	1.15875	0.212568	0.601798	0.220549
YHR216W	IMD2	0.869565	-0.201634	0.601798	0.220549
YJR034W	PET191	1.14286	0.192645	0.601798	0.220549
YLR407W		1.14025	0.189351	0.601798	0.220549
YJR083C	ACF4	1.11732	0.16004	0.601798	0.220549
YER056C	FCY2	1.1655	0.22095	0.601798	0.220549
YHR008C	SOD2	1.11483	0.15682	0.605803	0.217668
YBR233W-A	DAD3	1.11483	0.15682	0.606271	0.217333
YOR283W		1.15075	0.202572	0.606587	0.217107
YKR046C	PET10	1.12486	0.169745	0.606587	0.217107
YPR164W	MMS1	1.17925	0.237864	0.606969	0.216833
YDL121C	EXP1	1.21507	0.281036	0.607052	0.216774
YNL252C	MRPL17	1.16822	0.224317	0.607052	0.216774
YLR185W	RPL37A	1.12233	0.166503	0.607052	0.216774
YMR099C		1.11359	0.155213	0.607052	0.216774
YPL079W	RPL21B	0.859845	-0.217851	0.607052	0.216774
YPR133W-A	TOM5	1.11359	0.155213	0.607052	0.216774
YML103C	NUP188	0.87184	-0.197865	0.607052	0.216774
YER172C	BRR2	1.14286	0.192645	0.607052	0.216774
YDR129C	SAC6	0.87184	-0.197865	0.607052	0.216774
YLR143W	DPH6	0.831947	-0.265437	0.607983	0.216109
YOL135C	MED7	0.8285	-0.271426	0.609634	0.214931
YKL154W	SRP102	0.868056	-0.204141	0.609634	0.214931
YLL050C	COF1	1.11235	0.153607	0.609634	0.214931
YJR077C	MIR1	0.8726	-0.196607	0.609634	0.214931
YPL225W		1.11235	0.153607	0.609634	0.214931
YNL024C-A	KSH1	1.12108	0.164884	0.609634	0.214931
YMR230W	RPS10B	1.11235	0.153607	0.609737	0.214857
YDR017C	KCS1	1.19332	0.254978	0.609737	0.214857
YGL006W	PMC1	1.19474	0.2567	0.609737	0.214857
YJL011C	RPC17	1.11235	0.153607	0.611904	0.213317
YAR015W	ADE1	1.11235	0.153607	0.611996	0.213252
YJR111C	PXP2	1.1655	0.22095	0.612339	0.213008
YCR028C-A	RIM1	1.11235	0.153607	0.612339	0.213008
YLR114C	AVL9	1.15607	0.209228	0.612339	0.213008
YIL108W		1.15607	0.209228	0.612339	0.213008
YIL035C	CKA1	0.87108	-0.199123	0.612339	0.213008
YLR388W	RPS29A	1.11111	0.152003	0.61252	0.21288
YDR098C	GRX3	1.11732	0.16004	0.61252	0.21288
YPR104C	FHL1	0.821018	-0.284514	0.61252	0.21288
YEL044W	IES6	0.873362	-0.195348	0.61252	0.21288
YLR295C	ATP14	0.856164	-0.22404	0.61252	0.21288
YGR276C	RNH70	1.13895	0.187707	0.61252	0.21288
YNR001C	CIT1	0.874126	-0.194087	0.61252	0.21288
YDR061W		0.868056	-0.204141	0.61252	0.21288
YKR079C	TRZ1	0.820345	-0.285698	0.61252	0.21288
YFR038W	IRC5	1.17925	0.237864	0.61252	0.21288
YNL147W	LSM7	1.10988	0.150401	0.61252	0.21288
YGL068W	MNP1	1.10988	0.150401	0.61252	0.21288
YDR391C		1.11732	0.16004	0.61252	0.21288
YPL254W	HFI1	0.818331	-0.289244	0.61252	0.21288
YDR117C	TMA64	0.865052	-0.209141	0.61252	0.21288
YIL065C	FIS1	1.11111	0.152003	0.61252	0.21288
YBR233W	PBP2	1.14548	0.195946	0.61252	0.21288
YGL079W	KXD1	1.12108	0.164884	0.61252	0.21288
YDR469W	SDC1	1.11111	0.152003	0.61252	0.21288
YOR207C	RET1	0.865801	-0.207893	0.61252	0.21288
YDL092W	SRP14	0.84246	-0.24732	0.61252	0.21288
YBR052C	RFS1	1.11111	0.152003	0.61252	0.21288
YHR147C	MRPL6	1.13507	0.182786	0.61252	0.21288
YDR356W	SPC110	0.846024	-0.24123	0.61252	0.21288
YBR216C	YBP1	0.858369	-0.22033	0.61252	0.21288
YDR062W	LCB2	0.81367	-0.297485	0.61252	0.21288
YPL263C	KEL3	0.870322	-0.200379	0.61252	0.21288
YDR188W	CCT6	0.874126	-0.194087	0.61252	0.21288
YJR148W	BAT2	1.13636	0.184425	0.61252	0.21288
YBR017C	KAP104	0.865801	-0.207893	0.61252	0.21288
YDL102W	POL3	0.847458	-0.238787	0.61252	0.21288
YOR119C	RIO1	0.870322	-0.200379	0.61252	0.21288
YGR136W	LSB1	1.10865	0.148801	0.61252	0.21288
YNL001W	DOM34	0.87184	-0.197865	0.61252	0.21288
YDR262W		1.20048	0.263612	0.61252	0.21288
YHR097C		1.14679	0.1976	0.61252	0.21288
YPL239W	YAR1	1.11111	0.152003	0.61252	0.21288
YBR278W	DPB3	1.11607	0.158429	0.613288	0.212336
YHR025W	THR1	0.87184	-0.197865	0.613288	0.212336
YDR331W	GPI8	0.817661	-0.290424	0.613288	0.212335
YCR048W	ARE1	1.21803	0.284546	0.61556	0.210729
YGR198W	YPP1	0.87184	-0.197865	0.61556	0.210729
YLR262C	YPT6	0.865052	-0.209141	0.61556	0.210729
YLR126C		1.13379	0.181149	0.61556	0.210729
YHR063C	PAN5	0.874126	-0.194087	0.616462	0.210094
YGR280C	PXR1	0.87184	-0.197865	0.616462	0.210094
YBR244W	GPX2	1.10742	0.147202	0.616462	0.210094
YPL059W	GRX5	1.10742	0.147202	0.61702	0.209701
YNL173C	MDG1	1.10742	0.147202	0.61702	0.209701
YLR107W	REX3	1.15075	0.202572	0.61702	0.209701
YDR163W	CWC15	1.12994	0.176251	0.617243	0.209544
YLR009W	RLP24	0.865052	-0.209141	0.617243	0.209544
YOR143C	THI80	0.864304	-0.210389	0.617243	0.209544
YBL035C	POL12	0.8726	-0.196607	0.618089	0.208949
YDR329C	PEX3	0.81103	-0.302173	0.618089	0.208949
YER030W	CHZ1	1.10742	0.147202	0.618089	0.208949
YLR178C	TFS1	1.10988	0.150401	0.618089	0.208949
YKL053C-A	MDM35	1.11607	0.158429	0.618777	0.208466
YML015C	TAF11	0.848176	-0.237564	0.618938	0.208353
YHR036W	BRL1	1.21359	0.279284	0.618938	0.208353
YGR104C	SRB5	1.21212	0.277534	0.618938	0.208353
YJR069C	HAM1	1.10619	0.145605	0.61994	0.20765
YIL138C	TPM2	1.10619	0.145605	0.61994	0.20765
YOL060C	MAM3	1.1274	0.172994	0.621851	0.206314
YML035C	AMD1	1.10619	0.145605	0.621851	0.206314
YJR048W	CYC1	1.10619	0.145605	0.621851	0.206314
YNL006W	LST8	0.837521	-0.255803	0.623409	0.205227
YKL141W	SDH3	0.827815	-0.27262	0.625982	0.203438
YPL246C	RBD2	0.854701	-0.226509	0.625982	0.203438
YGR147C	NAT2	0.810373	-0.303342	0.625982	0.203438
YMR301C	ATM1	0.843882	-0.244887	0.625982	0.203438
YGL083W	SCY1	0.865052	-0.209141	0.625982	0.203438
YEL003W	GIM4	1.10497	0.14401	0.625982	0.203438
YGR049W	SCM4	1.18064	0.239566	0.625982	0.203438
YDR243C	PRP28	0.852515	-0.230203	0.625982	0.203438
YOL039W	RPP2A	1.10497	0.14401	0.625987	0.203435
YJR040W	GEF1	1.12867	0.174621	0.625987	0.203435
YAL003W	EFB1	1.10497	0.14401	0.626258	0.203247
YKL142W	MRP8	1.10497	0.14401	0.627735	0.202223
YNL153C	GIM3	1.10497	0.14401	0.630177	0.200538
YGR279C	SCW4	1.10988	0.150401	0.630958	0.199999
YJL201W	ECM25	1.20482	0.268817	0.630958	0.199999
YML100W	TSL1	1.10375	0.142417	0.633046	0.198565
YDR070C	FMP16	1.12994	0.176251	0.634363	0.197662
YOR078W	BUD21	1.20627	0.270556	0.634363	0.197662
YDR257C	RKM4	0.874126	-0.194087	0.634363	0.197662
YDR346C	SVF1	0.877193	-0.189034	0.635443	0.196923
YPL128C	TBF1	1.11607	0.158429	0.635443	0.196923
YPL086C	ELP3	0.877193	-0.189034	0.635827	0.196661
YNL061W	NOP2	0.880282	-0.183963	0.637773	0.195334
YKR074W	AIM29	1.10375	0.142417	0.637773	0.195334
YBR252W	DUT1	1.10375	0.142417	0.637773	0.195334
YPR052C	NHP6A	1.10254	0.140826	0.638874	0.194585
YMR062C	ARG7	1.10254	0.140826	0.639466	0.194182
YML115C	VAN1	0.870322	-0.200379	0.639466	0.194182
YNL010W	PYP1	1.10254	0.140826	0.642182	0.192342
YJR074W	MOG1	1.10254	0.140826	0.643	0.191789
YBL017C	PEP1	0.881057	-0.182692	0.644137	0.191022
YKL058W	TOA2	1.10254	0.140826	0.64808	0.188371
YJR006W	POL31	0.853971	-0.227741	0.649179	0.187635
YBR111C	YSA1	1.10132	0.139236	0.649179	0.187635
YJR096W		1.13379	0.181149	0.649179	0.187635
YLR323C	CWC24	1.1655	0.22095	0.649179	0.187635
YNR032C-A	HUB1	1.1655	0.22095	0.649179	0.187635
YHR215W	PHO12	1.10132	0.139236	0.649179	0.187635
YNL265C	IST1	1.1655	0.22095	0.649179	0.187635
YEL001C	IRC22	1.10865	0.148801	0.649179	0.187635
YEL018W	EAF5	1.12994	0.176251	0.649179	0.187635
YOR347C	PYK2	0.873362	-0.195348	0.652521	0.185406
YIL051C	MMF1	1.10011	0.137648	0.654086	0.184365
YGR078C	PAC10	1.10375	0.142417	0.654086	0.184365
YDL120W	YFH1	1.10865	0.148801	0.654289	0.184231
YDR334W	SWR1	0.856898	-0.222805	0.656181	0.182976
YDR068W	DOS2	1.10011	0.137648	0.657457	0.182133
YGL027C	CWH41	0.881057	-0.182692	0.657457	0.182133
YOR254C	SEC63	0.883392	-0.178874	0.659419	0.180838
YCR015C	CTO1	1.19332	0.254978	0.659419	0.180838
YLR390W	ECM19	1.10988	0.150401	0.659419	0.180838
YMR231W	PEP5	0.84674	-0.240009	0.659419	0.180838
YDR378C	LSM6	1.10011	0.137648	0.662333	0.178924
YOR176W	HEM15	0.883392	-0.178874	0.664043	0.177804
YDR047W	HEM12	0.873362	-0.195348	0.664043	0.177804
YGR031W	IMO32	0.858369	-0.22033	0.664043	0.177804
YPR062W	FCY1	1.10132	0.139236	0.664043	0.177804
YPL031C	PHO85	0.868056	-0.204141	0.664043	0.177804
YBR140C	IRA1	0.839631	-0.252173	0.664043	0.177804
YKL054C	DEF1	1.0989	0.136062	0.664043	0.177804
YLL041C	SDH2	1.10254	0.140826	0.665813	0.176648
YGL153W	PEX14	1.0989	0.136062	0.665813	0.176648
YMR228W	MTF1	0.825764	-0.276199	0.665813	0.176648
YOR253W	NAT5	1.10619	0.145605	0.665813	0.176648
YFR001W	LOC1	0.879507	-0.185232	0.665813	0.176648
YGR222W	PET54	1.14025	0.189351	0.665813	0.176648
YBR094W	PBY1	1.15607	0.209228	0.665813	0.176648
YHR186C	KOG1	1.10742	0.147202	0.665813	0.176648
YNL016W	PUB1	1.09769	0.134477	0.6686	0.174834
YKL117W	SBA1	1.09769	0.134477	0.6686	0.174834
YPL037C	EGD1	1.09769	0.134477	0.669539	0.174224
YML092C	PRE8	1.09769	0.134477	0.670986	0.173287
YNL297C	MON2	0.859107	-0.219091	0.674044	0.171312
YIL135C	VHS2	1.20773	0.272297	0.674128	0.171258
YHR205W	SCH9	0.877193	-0.189034	0.674128	0.171258
YLR038C	COX12	1.09769	0.134477	0.674806	0.170821
YOL005C	RPB11	1.09769	0.134477	0.676228	0.169907
YOR007C	SGT2	1.09769	0.134477	0.676228	0.169907
YDR032C	PST2	1.09529	0.131313	0.676874	0.169492
YGR271W	SLH1	0.878735	-0.186501	0.676874	0.169492
YER175C	TMT1	1.14943	0.200913	0.676874	0.169492
YMR044W	IOC4	0.86881	-0.202888	0.676874	0.169492
YGL001C	ERG26	0.882613	-0.180148	0.676874	0.169492
YGL099W	LSG1	0.886525	-0.173767	0.676874	0.169492
YBR049C	REB1	0.86881	-0.202888	0.676874	0.169492
YKR090W	PXL1	1.11732	0.16004	0.676874	0.169492
YER145C	FTR1	1.11982	0.163268	0.676874	0.169492
YGR055W	MUP1	1.16822	0.224317	0.676874	0.169492
YPR163C	TIF3	1.09649	0.132894	0.676874	0.169492
YFL039C	ACT1	0.88574	-0.175045	0.676874	0.169492
YPL048W	CAM1	0.88574	-0.175045	0.676874	0.169492
YLR357W	RSC2	0.86881	-0.202888	0.676874	0.169492
YGL080W	MPC1	1.10497	0.14401	0.676874	0.169492
YGR250C		1.11483	0.15682	0.676874	0.169492
YOL054W	PSH1	1.18343	0.242977	0.676874	0.169492
YLR378C	SEC61	0.881057	-0.182692	0.676874	0.169492
YGR008C	STF2	1.10497	0.14401	0.676874	0.169492
YNL177C	MRPL22	0.877963	-0.187768	0.676874	0.169492
YJL053W	PEP8	1.20919	0.274041	0.676874	0.169492
YER171W	RAD3	0.837521	-0.255803	0.676874	0.169492
YCR057C	PWP2	0.886525	-0.173767	0.677146	0.169317
YOR061W	CKA2	0.882613	-0.180148	0.677592	0.169032
YLR096W	KIN2	1.10254	0.140826	0.677676	0.168978
YMR113W	FOL3	1.14679	0.1976	0.680563	0.167131
YGR181W	TIM13	1.09529	0.131313	0.680634	0.167086
YFR016C		1.09529	0.131313	0.681015	0.166843
YDR510W	SMT3	1.09529	0.131313	0.683314	0.165379
YGL159W		0.844595	-0.243669	0.683314	0.165379
YGR186W	TFG1	0.877193	-0.189034	0.683314	0.165379
YIL053W	GPP1	1.09409	0.129734	0.685363	0.16408
YFL017C	GNA1	1.11483	0.15682	0.688788	0.161915
YJR145C	RPS4A	0.887311	-0.172488	0.68896	0.161806
YKR035W-A	DID2	1.09409	0.129734	0.6908	0.160647
YHR193C	EGD2	1.09409	0.129734	0.690845	0.160619
YIL107C	PFK26	1.17233	0.229382	0.691627	0.160128
YJL176C	SWI3	0.883392	-0.178874	0.693329	0.15906
YER089C	PTC2	0.887311	-0.172488	0.693329	0.15906
YML079W		1.0929	0.128156	0.69421	0.158509
YER029C	SMB1	0.834725	-0.260628	0.69421	0.158509
YBL090W	MRP21	1.10011	0.137648	0.69421	0.158509
YGR026W		1.11982	0.163268	0.69421	0.158509
YJL085W	EXO70	0.870322	-0.200379	0.69421	0.158509
YDL116W	NUP84	0.881057	-0.182692	0.69421	0.158509
YDR348C	PAL1	0.884173	-0.177599	0.69421	0.158509
YHR122W		0.870322	-0.200379	0.69421	0.158509
YDL215C	GDH2	0.886525	-0.173767	0.69421	0.158509
YOR291W	YPK9	0.841751	-0.248535	0.69421	0.158509
YOR278W	HEM4	1.13379	0.181149	0.69421	0.158509
YOR369C	RPS12	1.0929	0.128156	0.69421	0.158509
YPR148C		1.0929	0.128156	0.69421	0.158509
YNL281W	HCH1	1.0929	0.128156	0.69421	0.158509
YJL036W	SNX4	0.875657	-0.191563	0.69421	0.158509
YMR276W	DSK2	1.0929	0.128156	0.69421	0.158509
YKL095W	YJU2	0.862813	-0.212881	0.69421	0.158509
YLR330W	CHS5	1.11732	0.16004	0.697083	0.156716
YMR302C	YME2	1.18906	0.249822	0.697083	0.156716
YDL122W	UBP1	0.884956	-0.176323	0.697083	0.156716
YGR229C	SMI1	1.0917	0.12658	0.697083	0.156716
YJL186W	MNN5	0.884956	-0.176323	0.698335	0.155936
YOR299W	BUD7	0.834725	-0.260628	0.698564	0.155794
YKR024C	DBP7	0.848176	-0.237564	0.698817	0.155636
YER019W	ISC1	1.14025	0.189351	0.698817	0.155636
YLR421C	RPN13	1.0917	0.12658	0.699001	0.155522
YLR054C	OSW2	0.874126	-0.194087	0.700098	0.154841
YEL022W	GEA2	0.888099	-0.171207	0.700098	0.154841
YDL108W	KIN28	0.881057	-0.182692	0.700098	0.154841
YDR296W	MHR1	1.14943	0.200913	0.70024	0.154753
YPL023C	MET12	1.0989	0.136062	0.70024	0.154753
YPR028W	YOP1	0.887311	-0.172488	0.70024	0.154753
YDL148C	NOP14	0.888099	-0.171207	0.70024	0.154753
YJR099W	YUH1	1.0929	0.128156	0.70024	0.154753
YBR236C	ABD1	0.88574	-0.175045	0.70024	0.154753
YCR011C	ADP1	1.10132	0.139236	0.700992	0.154287
YGR203W	YCH1	1.11483	0.15682	0.700992	0.154287
YPR031W	NTO1	0.838926	-0.253384	0.700992	0.154287
YJR043C	POL32	1.10011	0.137648	0.701259	0.154122
YDL090C	RAM1	0.831255	-0.266637	0.701259	0.154122
YBR139W		1.11235	0.153607	0.701259	0.154122
YPR084W		1.19048	0.251539	0.701259	0.154122
YNR054C	ESF2	1.12994	0.176251	0.701259	0.154122
YHR132W-A	IGO2	1.09051	0.125006	0.701259	0.154122
YER009W	NTF2	1.09051	0.125006	0.701259	0.154122
YOL045W	PSK2	0.835422	-0.259423	0.702686	0.153239
YOR168W	GLN4	0.891266	-0.166073	0.702886	0.153115
YOR197W	MCA1	1.09051	0.125006	0.702886	0.153115
YNL118C	DCP2	1.11111	0.152003	0.702886	0.153115
YLR117C	CLF1	1.18343	0.242977	0.703031	0.153026
YDL178W	DLD2	0.886525	-0.173767	0.70523	0.151669
YNL248C	RPA49	0.891266	-0.166073	0.70523	0.151669
YDR530C	APA2	1.13636	0.184425	0.70523	0.151669
YOL143C	RIB4	1.08932	0.123434	0.705546	0.151475
YDL053C	PBP4	0.880282	-0.183963	0.705546	0.151475
YNL310C	ZIM17	1.11483	0.15682	0.70643	0.150931
YML021C	UNG1	0.886525	-0.173767	0.708232	0.149825
YGL108C		1.19617	0.258425	0.708744	0.149511
YDR515W	SLF1	0.859107	-0.219091	0.708744	0.149511
YCR023C		0.856898	-0.222805	0.710534	0.148415
YML062C	MFT1	1.08814	0.121863	0.714038	0.146279
YOR065W	CYT1	0.884956	-0.176323	0.714038	0.146279
YHL015W	RPS20	1.08814	0.121863	0.715039	0.14567
YNL227C	JJJ1	0.849618	-0.235114	0.715039	0.14567
YEL055C	POL5	0.892061	-0.164786	0.715039	0.14567
YHR200W	RPN10	1.08814	0.121863	0.718577	0.143527
YDR091C	RLI1	0.892857	-0.163499	0.718577	0.143527
YBL045C	COR1	0.892857	-0.163499	0.718577	0.143527
YNL162W	RPL42A	0.892857	-0.163499	0.718577	0.143527
YNL040W		0.888099	-0.171207	0.718577	0.143527
YCL014W	BUD3	1.09409	0.129734	0.718577	0.143527
YKL080W	VMA5	0.892857	-0.163499	0.718577	0.143527
YDR490C	PKH1	0.880282	-0.183963	0.718577	0.143527
YDR063W	AIM7	1.09769	0.134477	0.718577	0.143527
YKL155C	RSM22	0.87184	-0.197865	0.718577	0.143527
YPL053C	KTR6	1.14025	0.189351	0.718749	0.143423
YFL010C	WWM1	1.08932	0.123434	0.718749	0.143423
YDR497C	ITR1	1.12233	0.166503	0.718788	0.143399
YIL144W	NDC80	1.17647	0.234465	0.719275	0.143105
YDR496C	PUF6	0.893655	-0.16221	0.719311	0.143084
YFL023W	BUD27	1.09409	0.129734	0.719919	0.142717
YJR135W-A	TIM8	1.08696	0.120294	0.719919	0.142717
YGL151W	NUT1	0.888889	-0.169925	0.719919	0.142717
YHR159W	TDA11	0.882613	-0.180148	0.719919	0.142717
YDL065C	PEX19	1.08696	0.120294	0.719919	0.142717
YNL200C	NNR1	1.13122	0.177882	0.719919	0.142717
YDL226C	GCS1	1.08696	0.120294	0.719919	0.142717
YBR262C	MIC12	1.09529	0.131313	0.720823	0.142171
YKL027W	TCD2	0.892061	-0.164786	0.720823	0.142171
YKL056C	TMA19	1.08696	0.120294	0.7217	0.141643
YJL121C	RPE1	1.09529	0.131313	0.7217	0.141643
YEL039C	CYC7	1.17509	0.232769	0.7217	0.141643
YNL161W	CBK1	0.892857	-0.163499	0.7217	0.141643
YEL040W	UTR2	0.890472	-0.167358	0.7217	0.141643
YDR083W	RRP8	0.891266	-0.166073	0.721814	0.141575
YLR299W	ECM38	1.11982	0.163268	0.721814	0.141575
YER073W	ALD5	0.894454	-0.16092	0.724007	0.140257
YDR176W	NGG1	1.1325	0.179515	0.727603	0.138106
YOR101W	RAS1	1.0989	0.136062	0.727603	0.138106
YIR022W	SEC11	0.895255	-0.159629	0.732652	0.135102
YIL074C	SER33	0.895255	-0.159629	0.732652	0.135102
YDR248C		1.14155	0.190997	0.733793	0.134426
YGL048C	RPT6	0.895255	-0.159629	0.733852	0.134392
YBL050W	SEC17	1.0846	0.117161	0.733852	0.134392
YOR316C	COT1	1.13895	0.187707	0.733852	0.134392
YDL139C	SCM3	1.16822	0.224317	0.735709	0.133294
YGR056W	RSC1	0.888099	-0.171207	0.735709	0.133294
YKR008W	RSC4	0.892061	-0.164786	0.735709	0.133294
YLR109W	AHP1	1.0846	0.117161	0.735709	0.133294
YER036C	ARB1	0.895255	-0.159629	0.735709	0.133294
YHR170W	NMD3	0.893655	-0.16221	0.735709	0.133294
YBL028C		0.892061	-0.164786	0.735709	0.133294
YMR048W	CSM3	0.881834	-0.181421	0.735709	0.133294
YNL062C	GCD10	0.892857	-0.163499	0.735709	0.133294
YDL125C	HNT1	1.08342	0.115597	0.735709	0.133294
YKR082W	NUP133	0.895255	-0.159629	0.735709	0.133294
YJR060W	CBF1	1.0846	0.117161	0.735709	0.133294
YOR271C	FSF1	0.894454	-0.16092	0.735709	0.133294
YLR328W	NMA1	0.8726	-0.196607	0.735709	0.133294
YOL056W	GPM3	1.18765	0.248108	0.735709	0.133294
YKL165C	MCD4	0.88968	-0.168642	0.735709	0.133294
YLR032W	RAD5	0.86881	-0.202888	0.735709	0.133294
YOL055C	THI20	1.17096	0.227692	0.735709	0.133294
YGR196C	FYV8	1.0929	0.128156	0.735709	0.133294
YHR046C	INM1	1.15607	0.209228	0.735709	0.133294
YNL257C	SIP3	0.8726	-0.196607	0.735709	0.133294
YMR225C	MRPL44	1.10497	0.14401	0.735709	0.133294
YBR002C	RER2	0.846024	-0.24123	0.735996	0.133125
YDL135C	RDI1	1.08342	0.115597	0.735996	0.133125
YLR120C	YPS1	0.856898	-0.222805	0.737314	0.132348
YGR177C	ATF2	0.881834	-0.181421	0.737314	0.132348
YGL093W	SPC105	0.841751	-0.248535	0.737314	0.132348
YML095C	RAD10	0.863558	-0.211635	0.737314	0.132348
YNL272C	SEC2	0.893655	-0.16221	0.737314	0.132348
YJL167W	ERG20	0.896861	-0.157044	0.737314	0.132348
YBL021C	HAP3	1.11857	0.161653	0.737314	0.132348
YJR117W	STE24	0.896861	-0.157044	0.737314	0.132348
YGL061C	DUO1	1.11607	0.158429	0.737314	0.132348
YLL038C	ENT4	1.14679	0.1976	0.737314	0.132348
YJR051W	OSM1	0.892061	-0.164786	0.737314	0.132348
YJL074C	SMC3	0.892857	-0.163499	0.738411	0.131702
YLR222C	UTP13	0.897666	-0.155749	0.740469	0.130493
YDR381C-A		1.1534	0.205896	0.740469	0.130493
YEL061C	CIN8	0.878735	-0.186501	0.740469	0.130493
YKL195W	MIA40	1.08225	0.114035	0.740469	0.130493
YMR157C	AIM36	1.10619	0.145605	0.740469	0.130493
YDR295C	HDA2	0.848896	-0.23634	0.740469	0.130493
YDR005C	MAF1	1.1655	0.22095	0.740469	0.130493
YCL057C-A	MIC10	1.08225	0.114035	0.740469	0.130493
YJL010C	NOP9	0.896057	-0.158337	0.740469	0.130493
YCL061C	MRC1	1.14679	0.1976	0.740469	0.130493
YOR212W	STE4	1.08932	0.123434	0.742743	0.129161
YPL166W	ATG29	1.16822	0.224317	0.744386	0.128202
YDR013W	PSF1	1.10988	0.150401	0.744386	0.128202
YOL051W	GAL11	1.10011	0.137648	0.744386	0.128202
YNR034W	SOL1	1.09529	0.131313	0.744386	0.128202
YMR080C	NAM7	0.896057	-0.158337	0.744386	0.128202
YJL123C	MTC1	1.08108	0.112475	0.744386	0.128202
YDL061C	RPS29B	1.07991	0.110916	0.744386	0.128202
YPR011C		0.877193	-0.189034	0.744386	0.128202
YBR123C	TFC1	0.84674	-0.240009	0.744386	0.128202
YML028W	TSA1	1.07991	0.110916	0.744386	0.128202
YNL056W	OCA2	1.16414	0.21927	0.744386	0.128202
YLR078C	BOS1	1.10742	0.147202	0.744386	0.128202
YLR138W	NHA1	1.08696	0.120294	0.744386	0.128202
YDR201W	SPC19	1.08225	0.114035	0.744386	0.128202
YHR007C	ERG11	0.898473	-0.154454	0.744386	0.128202
YER014W	HEM14	0.897666	-0.155749	0.744386	0.128202
YPL283C	YRF1-3	0.849618	-0.235114	0.744386	0.128202
YBR155W	CNS1	0.896861	-0.157044	0.744386	0.128202
YML108W		1.0846	0.117161	0.744386	0.128202
YFR024C-A	LSB3	1.08932	0.123434	0.744386	0.128202
YDR427W	RPN9	0.899281	-0.153157	0.744386	0.128202
YGL201C	MCM6	1.09051	0.125006	0.745465	0.127573
YLR418C	CDC73	1.07991	0.110916	0.745615	0.127485
YHR086W	NAM8	0.895255	-0.159629	0.746267	0.127106
YDL067C	COX9	0.874126	-0.194087	0.746629	0.126895
YMR145C	NDE1	0.90009	-0.151859	0.746629	0.126895
YPL117C	IDI1	1.08225	0.114035	0.746629	0.126895
YER055C	HIS1	0.90009	-0.151859	0.746629	0.126895
YCR067C	SED4	0.884956	-0.176323	0.74689	0.126744
YJR063W	RPA12	1.07875	0.109359	0.746906	0.126734
YHR052W	CIC1	0.90009	-0.151859	0.747557	0.126356
YHR081W	LRP1	0.895255	-0.159629	0.747557	0.126356
YEL060C	PRB1	1.07875	0.109359	0.747557	0.126356
YHR082C	KSP1	0.849618	-0.235114	0.747587	0.126338
YDR373W	FRQ1	1.1236	0.168123	0.747609	0.126326
YNR016C	ACC1	0.90009	-0.151859	0.747609	0.126326
YJL051W	IRC8	1.16279	0.217591	0.748932	0.125558
YER017C	AFG3	1.13122	0.177882	0.754638	0.122261
YNL290W	RFC3	1.08225	0.114035	0.754638	0.122261
YKL119C	VPH2	1.11732	0.16004	0.754638	0.122261
YGL139W	FLC3	1.10254	0.140826	0.754638	0.122261
YOL120C	RPL18A	0.900901	-0.15056	0.754638	0.122261
YPL093W	NOG1	0.900901	-0.15056	0.754638	0.122261
YDR466W	PKH3	0.851064	-0.232661	0.7582	0.120216
YDR321W	ASP1	0.90009	-0.151859	0.75848	0.120056
YLR291C	GCD7	0.900901	-0.15056	0.75848	0.120056
YDR464W	SPP41	1.1236	0.168123	0.75848	0.120056
YFR006W		0.90009	-0.151859	0.75848	0.120056
YGL125W	MET13	0.890472	-0.167358	0.75848	0.120056
YOR194C	TOA1	1.0846	0.117161	0.75848	0.120056
YJR105W	ADO1	1.07759	0.107803	0.760816	0.11872
YOR046C	DBP5	0.901713	-0.149259	0.762177	0.117944
YDL190C	UFD2	0.899281	-0.153157	0.762177	0.117944
YJL141C	YAK1	1.12867	0.174621	0.762206	0.117928
YDL119C	HEM25	1.14025	0.189351	0.762388	0.117824
YEL015W	EDC3	0.901713	-0.149259	0.76349	0.117197
YFR044C	DUG1	1.07643	0.106249	0.764218	0.116783
YHL030W	ECM29	0.902527	-0.147958	0.766442	0.115521
YDL101C	DUN1	0.90009	-0.151859	0.766442	0.115521
YNL108C		1.07759	0.107803	0.766442	0.115521
YPR016C	TIF6	1.07643	0.106249	0.766442	0.115521
YBR272C	HSM3	1.15207	0.204233	0.767122	0.115136
YHR038W	RRF1	1.11111	0.152003	0.767122	0.115136
YDR111C	ALT2	1.09529	0.131313	0.767122	0.115136
YNL027W	CRZ1	1.11111	0.152003	0.769088	0.114024
YKR007W	MEH1	1.14155	0.190997	0.769224	0.113947
YLR256W	HAP1	0.888889	-0.169925	0.769861	0.113588
YIL062C	ARC15	1.07643	0.106249	0.769861	0.113588
YNL054W	VAC7	1.07991	0.110916	0.771486	0.112672
YMR259C	TRM732	0.900901	-0.15056	0.771486	0.112672
YNL058C		1.1325	0.179515	0.771486	0.112672
YLR215C	CDC123	0.854701	-0.226509	0.771486	0.112672
YPL096W	PNG1	1.12613	0.171368	0.771486	0.112672
YDR341C		0.902527	-0.147958	0.771486	0.112672
YKL114C	APN1	0.896861	-0.157044	0.771939	0.112417
YPL183C	RTT10	0.901713	-0.149259	0.772614	0.112038
YGR232W	NAS6	1.07527	0.104697	0.772754	0.111959
YBR162C	TOS1	1.07527	0.104697	0.772754	0.111959
YIL015W	BAR1	1.07411	0.103147	0.773839	0.111349
YIL145C	PAN6	0.90009	-0.151859	0.773839	0.111349
YGR264C	MES1	0.904159	-0.145351	0.773839	0.111349
YMR091C	NPL6	0.90009	-0.151859	0.773839	0.111349
YBR034C	HMT1	0.903342	-0.146655	0.773839	0.111349
YJL128C	PBS2	1.08108	0.112475	0.773839	0.111349
YDL167C	NRP1	1.15607	0.209228	0.773839	0.111349
YOR158W	PET123	1.08108	0.112475	0.773839	0.111349
YMR307W	GAS1	0.903342	-0.146655	0.773839	0.111349
YFR031C	SMC2	0.897666	-0.155749	0.773839	0.111349
YPL220W	RPL1A	0.903342	-0.146655	0.773839	0.111349
YDL130W-A	STF1	1.07991	0.110916	0.773839	0.111349
YBR089C-A	NHP6B	1.07527	0.104697	0.773839	0.111349
YNR035C	ARC35	0.903342	-0.146655	0.773839	0.111349
YOR320C	GNT1	1.12613	0.171368	0.773839	0.111349
YGL112C	TAF6	0.90009	-0.151859	0.773839	0.111349
YER069W	ARG5	0.900901	-0.15056	0.773839	0.111349
YBL041W	PRE7	1.07411	0.103147	0.775033	0.11068
YKL013C	ARC19	1.0929	0.128156	0.775564	0.110383
YDR071C	PAA1	1.07411	0.103147	0.77572	0.110295
YOL115W	PAP2	0.899281	-0.153157	0.776377	0.109928
YMR009W	ADI1	1.12108	0.164884	0.778274	0.108868
YIL149C	MLP2	1.0846	0.117161	0.778274	0.108868
YKR100C	SKG1	1.07411	0.103147	0.778274	0.108868
YDR192C	NUP42	0.892061	-0.164786	0.779701	0.108072
YOR217W	RFC1	0.899281	-0.153157	0.780897	0.107406
YPL273W	SAM4	1.08108	0.112475	0.781462	0.107092
YHL020C	OPI1	1.10132	0.139236	0.781462	0.107092
YIL161W		0.890472	-0.167358	0.781462	0.107092
YKL077W	PSG1	1.08108	0.112475	0.781462	0.107092
YGL157W	ARI1	1.07296	0.101598	0.781462	0.107092
YLR285W	NNT1	1.07411	0.103147	0.781462	0.107092
YNL065W	AQR1	1.16686	0.222633	0.781462	0.107092
YDL051W	LHP1	0.903342	-0.146655	0.781462	0.107092
YAR008W	SEN34	1.11607	0.158429	0.781462	0.107092
YGL055W	OLE1	0.904977	-0.144046	0.781462	0.107092
YFL034C-B	MOB2	0.877963	-0.187768	0.781462	0.107092
YDR399W	HPT1	1.07875	0.109359	0.781462	0.107092
YML031W	NDC1	0.881057	-0.182692	0.781562	0.107036
YNL169C	PSD1	0.904159	-0.145351	0.781562	0.107036
YHR070W	TRM5	0.904159	-0.145351	0.781818	0.106894
YGL012W	ERG4	1.07759	0.107803	0.781818	0.106894
YLL018C-A	COX19	1.07875	0.109359	0.781818	0.106894
YDR448W	ADA2	0.861326	-0.215368	0.781818	0.106894
YBR003W	COQ1	1.12233	0.166503	0.781818	0.106894
YLR250W	SSP120	1.07296	0.101598	0.783546	0.105936
YCR047C	BUD23	0.894454	-0.16092	0.78443	0.105446
YIL043C	CBR1	0.905797	-0.14274	0.785415	0.104901
YCL054W	SPB1	0.904977	-0.144046	0.785415	0.104901
YAL059W	ECM1	1.07991	0.110916	0.785415	0.104901
YJR065C	ARP3	0.905797	-0.14274	0.785415	0.104901
YJL096W	MRPL49	1.0917	0.12658	0.785415	0.104901
YHR114W	BZZ1	0.904159	-0.145351	0.785415	0.104901
YDL171C	GLT1	0.906618	-0.141433	0.785415	0.104901
YJL155C	FBP26	0.887311	-0.172488	0.785415	0.104901
YKL182W	FAS1	0.905797	-0.14274	0.785415	0.104901
YEL012W	UBC8	1.07875	0.109359	0.785415	0.104901
YJL183W	MNN11	0.905797	-0.14274	0.785415	0.104901
YBL091C	MAP2	1.07759	0.107803	0.785415	0.104901
YLR103C	CDC45	0.860585	-0.21661	0.79056	0.102065
YJL030W	MAD2	1.07991	0.110916	0.79056	0.102065
YDR345C	HXT3	1.0846	0.117161	0.79056	0.102065
YDL165W	CDC36	1.10132	0.139236	0.79056	0.102065
YER139C	RTR1	1.09409	0.129734	0.791055	0.101794
YLR422W	DCK1	0.896861	-0.157044	0.791479	0.101561
YHR023W	MYO1	0.903342	-0.146655	0.792366	0.101074
YKL052C	ASK1	1.15875	0.212568	0.792366	0.101074
YLR115W	CFT2	0.859845	-0.217851	0.793124	0.100659
YMR311C	GLC8	1.07066	0.0985055	0.795213	0.0995166
YNR029C		1.11982	0.163268	0.797143	0.098464
YPL217C	BMS1	0.906618	-0.141433	0.797143	0.098464
YGR208W	SER2	1.07066	0.0985055	0.797143	0.098464
YPL231W	FAS2	0.907441	-0.140124	0.797143	0.098464
YKL215C	OXP1	0.907441	-0.140124	0.79886	0.0975292
YHR158C	KEL1	1.07411	0.103147	0.79886	0.0975292
YAR002C-A	ERP1	0.904977	-0.144046	0.79886	0.0975292
YKL148C	SDH1	0.904977	-0.144046	0.79886	0.0975292
YMR161W	HLJ1	1.07643	0.106249	0.79886	0.0975292
YBL016W	FUS3	0.901713	-0.149259	0.799769	0.0970354
YFR019W	FAB1	0.87184	-0.197865	0.799769	0.0970354
YER019C-A	SBH2	1.0917	0.12658	0.799769	0.0970354
YPL226W	NEW1	0.908265	-0.138814	0.799769	0.0970354
YDR374W-A	WIP1	1.1534	0.205896	0.799769	0.0970354
YDR375C	BCS1	1.11111	0.152003	0.799769	0.0970354
YGL206C	CHC1	0.907441	-0.140124	0.799769	0.0970354
YER129W	SAK1	1.12867	0.174621	0.799769	0.0970354
YAL035W	FUN12	0.908265	-0.138814	0.799769	0.0970354
YMR046C	TY1A-MR1	1.07411	0.103147	0.799769	0.0970354
YPL101W	ELP4	0.891266	-0.166073	0.799769	0.0970354
YOR159C	SME1	1.09769	0.134477	0.801104	0.0963112
YPR175W	DPB2	0.890472	-0.167358	0.802572	0.095516
YER103W	SSA4	1.07296	0.101598	0.803662	0.0949265
YBL056W	PTC3	0.907441	-0.140124	0.803662	0.0949265
YLR002C	NOC3	0.906618	-0.141433	0.803662	0.0949265
YNL246W	VPS75	1.07411	0.103147	0.803662	0.0949265
YMR289W	ABZ2	0.894454	-0.16092	0.803662	0.0949265
YNL139C	THO2	0.907441	-0.140124	0.803662	0.0949265
YNR021W		0.909918	-0.136191	0.803662	0.0949265
YKR060W	UTP30	0.876424	-0.190299	0.803662	0.0949265
YMR239C	RNT1	1.09769	0.134477	0.803662	0.0949265
YDR517W	GRH1	0.907441	-0.140124	0.803662	0.0949265
YER020W	GPA2	0.897666	-0.155749	0.803662	0.0949265
YGL030W	RPL30	1.06838	0.0954196	0.803662	0.0949265
YJR121W	ATP2	0.909918	-0.136191	0.803662	0.0949265
YLR249W	YEF3	0.909918	-0.136191	0.803662	0.0949265
YDR206W	EBS1	1.11359	0.155213	0.803662	0.0949265
YOR202W	HIS3	0.904977	-0.144046	0.803662	0.0949265
YOR174W	MED4	1.07527	0.104697	0.803662	0.0949265
YMR294W	JNM1	0.869565	-0.201634	0.803662	0.0949265
YHR149C	SKG6	1.14286	0.192645	0.803662	0.0949265
YDR177W	UBC1	1.06838	0.0954196	0.803662	0.0949265
YOR215C	AIM41	1.06838	0.0954196	0.803662	0.0949265
YML063W	RPS1B	0.909091	-0.137504	0.803662	0.0949265
YLL023C	POM33	0.875657	-0.191563	0.803662	0.0949265
YGL171W	ROK1	0.907441	-0.140124	0.803662	0.0949265
YGR082W	TOM20	1.06838	0.0954196	0.803662	0.0949265
YER021W	RPN3	0.909918	-0.136191	0.803662	0.0949265
YGR103W	NOP7	0.909918	-0.136191	0.803662	0.0949265
YDR258C	HSP78	1.06838	0.0954196	0.803662	0.0949265
YER067W	RGI1	1.07411	0.103147	0.803662	0.0949265
YDR361C	BCP1	1.07759	0.107803	0.803662	0.0949265
YGR007W	ECT1	0.893655	-0.16221	0.803662	0.0949265
YLR022C	SDO1	0.909918	-0.136191	0.803662	0.0949265
YFR037C	RSC8	0.909091	-0.137504	0.803662	0.0949265
YKL040C	NFU1	1.07527	0.104697	0.803662	0.0949265
YGL119W	COQ8	1.07181	0.100051	0.803662	0.0949265
YIL153W	RRD1	0.875657	-0.191563	0.803662	0.0949265
YHR146W	CRP1	1.06724	0.093879	0.803662	0.0949265
YCR088W	ABP1	1.06724	0.093879	0.803662	0.0949265
YIR035C		1.14025	0.189351	0.803662	0.0949265
YGR282C	BGL2	1.06724	0.093879	0.803662	0.0949265
YGL097W	SRM1	0.908265	-0.138814	0.803662	0.0949265
YDL124W		1.06724	0.093879	0.805197	0.0940979
YOR189W	IES4	1.06724	0.093879	0.805248	0.0940705
YBR256C	RIB5	1.07066	0.0985055	0.807922	0.0926305
YIL112W	HOS4	0.894454	-0.16092	0.807922	0.0926305
YDL058W	USO1	0.910747	-0.134878	0.807922	0.0926305
YKL138C-A	HSK3	1.12108	0.164884	0.807922	0.0926305
YNR003C	RPC34	0.904159	-0.145351	0.807922	0.0926305
YLR387C	REH1	1.09529	0.131313	0.807922	0.0926305
YDR194C	MSS116	0.909918	-0.136191	0.808613	0.0922594
YGL238W	CSE1	0.909918	-0.136191	0.809696	0.0916779
YHR073W	OSH3	0.909918	-0.136191	0.809696	0.0916779
YIL041W	GVP36	1.0661	0.0923402	0.8124	0.0902302
YDR049W	VMS1	1.08696	0.120294	0.8124	0.0902302
YCR035C	RRP43	0.905797	-0.14274	0.8124	0.0902302
YNL127W	FAR11	0.884956	-0.176323	0.8124	0.0902302
YLR452C	SST2	1.07181	0.100051	0.812406	0.090227
YIL124W	AYR1	0.911577	-0.133564	0.812406	0.090227
YGL145W	TIP20	0.909091	-0.137504	0.812406	0.090227
YDR304C	CPR5	1.0661	0.0923402	0.812406	0.090227
YOL159C-A		1.07296	0.101598	0.812406	0.090227
YCL028W	RNQ1	1.07296	0.101598	0.812406	0.090227
YOR304W	ISW2	0.90009	-0.151859	0.812406	0.090227
YNL283C	WSC2	1.0846	0.117161	0.812406	0.090227
YDL205C	HEM3	0.868056	-0.204141	0.812406	0.090227
YIR008C	PRI1	0.906618	-0.141433	0.812406	0.090227
YDR145W	TAF12	1.12233	0.166503	0.812406	0.090227
YOR308C	SNU66	1.08578	0.118727	0.812406	0.090227
YDR159W	SAC3	1.14548	0.195946	0.812406	0.090227
YGR012W	MCY1	0.911577	-0.133564	0.813018	0.0898998
YMR209C		0.907441	-0.140124	0.813061	0.0898769
YPR105C	COG4	1.12486	0.169745	0.81441	0.0891569
YDR099W	BMH2	1.06496	0.0908029	0.81441	0.0891569
YAL013W	DEP1	0.906618	-0.141433	0.81881	0.0868171
YMR241W	YHM2	0.912409	-0.132248	0.820334	0.0860092
YDR343C	HXT6	1.08578	0.118727	0.821878	0.0851926
YOR142W	LSC1	0.912409	-0.132248	0.824504	0.0838074
YHL034C	SBP1	0.912409	-0.132248	0.824504	0.0838074
YIL118W	RHO3	1.07181	0.100051	0.824698	0.0837051
YOR116C	RPO31	0.912409	-0.132248	0.824698	0.0837051
YBL046W	PSY4	0.903342	-0.146655	0.824935	0.0835805
YDL063C	SYO1	0.909918	-0.136191	0.824935	0.0835805
YJR123W	RPS5	0.913242	-0.130931	0.824935	0.0835805
YAL023C	PMT2	0.913242	-0.130931	0.825019	0.0835359
YJL203W	PRP21	0.87184	-0.197865	0.825019	0.0835359
YGL018C	JAC1	1.08108	0.112475	0.825019	0.0835359
YLR008C	PAM18	1.06383	0.0892673	0.825019	0.0835359
YER157W	COG3	1.0846	0.117161	0.825019	0.0835359
YCR054C	CTR86	1.08932	0.123434	0.825286	0.0833954
YLR190W	MMR1	0.87108	-0.199123	0.825286	0.0833954
YDL166C	FAP7	1.08932	0.123434	0.825885	0.0830805
YML071C	COG8	0.903342	-0.146655	0.826953	0.082519
YGL187C	COX4	1.06383	0.0892673	0.827064	0.082461
YNL247W		0.913242	-0.130931	0.828412	0.0817535
YML112W	CTK3	1.07181	0.100051	0.828412	0.0817535
YLL029W	FRA1	0.910747	-0.134878	0.829454	0.0812077
YLR438C-A	LSM3	1.14025	0.189351	0.82993	0.0809587
YGL207W	SPT16	0.914077	-0.129613	0.82993	0.0809587
YNL160W	YGP1	1.0627	0.0877334	0.82993	0.0809587
YKR025W	RPC37	1.0627	0.0877334	0.82993	0.0809587
YOR323C	PRO2	0.914077	-0.129613	0.82993	0.0809587
YML065W	ORC1	0.88574	-0.175045	0.82993	0.0809587
YGL129C	RSM23	0.910747	-0.134878	0.82993	0.0809587
YLR292C	SEC72	1.08108	0.112475	0.82993	0.0809587
YDR483W	KRE2	1.06838	0.0954196	0.82993	0.0809587
YJR057W	CDC8	0.890472	-0.167358	0.82993	0.0809587
YLL011W	SOF1	0.912409	-0.132248	0.82993	0.0809587
YOR063W	RPL3	0.914077	-0.129613	0.82993	0.0809587
YML022W	APT1	1.0627	0.0877334	0.82993	0.0809587
YBL067C	UBP13	0.892857	-0.163499	0.82993	0.0809587
YKL205W	LOS1	0.875657	-0.191563	0.82993	0.0809587
YDR299W	BFR2	0.914077	-0.129613	0.83037	0.0807285
YCR086W	CSM1	1.08814	0.121863	0.831259	0.0802637
YPL065W	VPS28	1.11857	0.161653	0.831259	0.0802637
YBR227C	MCX1	0.913242	-0.130931	0.832123	0.0798124
YJL098W	SAP185	1.10865	0.148801	0.832123	0.0798124
YOR303W	CPA1	0.913242	-0.130931	0.832123	0.0798124
YGR200C	ELP2	0.914913	-0.128293	0.83213	0.0798088
YPR073C	LTP1	1.06157	0.086201	0.83213	0.0798088
YPL243W	SRP68	0.914913	-0.128293	0.835331	0.0781416
YDL220C	CDC13	0.905797	-0.14274	0.836217	0.0776812
YBR222C	PCS60	0.914913	-0.128293	0.836217	0.0776812
YOR195W	SLK19	1.06157	0.086201	0.836217	0.0776812
YFR004W	RPN11	0.914913	-0.128293	0.836217	0.0776812
YOL139C	CDC33	1.06157	0.086201	0.836217	0.0776812
YFR039C	OSW7	1.12867	0.174621	0.836217	0.0776812
YJR092W	BUD4	1.09529	0.131313	0.836217	0.0776812
YER125W	RSP5	1.06157	0.086201	0.838163	0.0766718
YOR294W	RRS1	0.914077	-0.129613	0.838163	0.0766718
YGR157W	CHO2	0.915751	-0.126973	0.838409	0.0765441
YLL022C	HIF1	0.914077	-0.129613	0.839296	0.0760849
YLR393W	ATP10	0.904977	-0.144046	0.839296	0.0760849
YOR108W	LEU9	0.914077	-0.129613	0.841069	0.0751684
YMR192W	GYL1	0.912409	-0.132248	0.841645	0.0748708
YER122C	GLO3	1.06045	0.0846703	0.842495	0.0744325
YPR081C	GRS2	1.13766	0.186065	0.842495	0.0744325
YNL312W	RFA2	1.06724	0.093879	0.842885	0.0742317
YLR276C	DBP9	0.915751	-0.126973	0.842885	0.0742317
YLR192C	HCR1	1.05932	0.0831412	0.843466	0.0739322
YCR051W		1.05932	0.0831412	0.843466	0.0739322
YNL106C	INP52	0.900901	-0.15056	0.843466	0.0739322
YLR033W	RSC58	0.915751	-0.126973	0.843466	0.0739322
YER127W	LCP5	1.07643	0.106249	0.843466	0.0739322
YPR191W	QCR2	0.91659	-0.125651	0.843466	0.0739322
YGR001C	EFM5	1.06724	0.093879	0.843466	0.0739322
YNL258C	DSL1	0.912409	-0.132248	0.843466	0.0739322
YDR171W	HSP42	1.06496	0.0908029	0.843466	0.0739322
YIL018W	RPL2B	0.91659	-0.125651	0.843466	0.0739322
YIL116W	HIS5	0.911577	-0.133564	0.843466	0.0739322
YIL022W	TIM44	0.91659	-0.125651	0.843466	0.0739322
YGR178C	PBP1	0.91659	-0.125651	0.843466	0.0739322
YDR457W	TOM1	1.06045	0.0846703	0.843466	0.0739322
YNR053C	NOG2	0.915751	-0.126973	0.843466	0.0739322
YOR133W	EFT1	0.91659	-0.125651	0.843466	0.0739322
YML082W		0.913242	-0.130931	0.843466	0.0739322
YBR188C	NTC20	1.06496	0.0908029	0.843466	0.0739322
YIR012W	SQT1	0.915751	-0.126973	0.843466	0.0739322
YLR342W	FKS1	0.915751	-0.126973	0.843466	0.0739322
YOR326W	MYO2	0.91659	-0.125651	0.843466	0.0739322
YDR305C	HNT2	0.904159	-0.145351	0.843466	0.0739322
YCR071C	IMG2	1.0661	0.0923402	0.843466	0.0739322
YDR347W	MRP1	1.06724	0.093879	0.843466	0.0739322
YOL067C	RTG1	1.06838	0.0954196	0.845096	0.0730942
YMR012W	CLU1	0.917431	-0.124328	0.845217	0.0730317
YBL039C	URA7	0.917431	-0.124328	0.845217	0.0730317
YCL050C	APA1	1.05932	0.0831412	0.845217	0.0730317
YNL099C	OCA1	1.07411	0.103147	0.845217	0.0730317
YKL041W	VPS24	1.0989	0.136062	0.845217	0.0730317
YGL173C	XRN1	0.917431	-0.124328	0.845217	0.0730317
YPL104W	MSD1	0.901713	-0.149259	0.845217	0.0730317
YIL091C	UTP25	0.915751	-0.126973	0.845217	0.0730317
YLR175W	CBF5	0.917431	-0.124328	0.845719	0.0727739
YLR290C	COQ11	1.07296	0.101598	0.846159	0.072548
YOR081C	TGL5	0.881057	-0.182692	0.846159	0.072548
YDR228C	PCF11	0.913242	-0.130931	0.846587	0.0723286
YJL084C	ALY2	1.10132	0.139236	0.846587	0.0723286
YOR251C	TUM1	1.0582	0.0816138	0.846587	0.0723286
YKL059C	MPE1	1.08342	0.115597	0.846587	0.0723286
YBR115C	LYS2	0.917431	-0.124328	0.846587	0.0723286
YLR025W	SNF7	1.0582	0.0816138	0.846587	0.0723286
YGR253C	PUP2	1.0582	0.0816138	0.846587	0.0723286
YPR125W	YLH47	0.914077	-0.129613	0.846587	0.0723286
YGR189C	CRH1	1.07527	0.104697	0.846659	0.0722916
YDR116C	MRPL1	1.06496	0.0908029	0.846659	0.0722916
YLL013C	PUF3	1.0582	0.0816138	0.846659	0.0722916
YHR056C	RSC30	0.914077	-0.129613	0.846659	0.0722916
YHR167W	THP2	1.0627	0.0877334	0.846659	0.0722916
YMR290C	HAS1	0.917431	-0.124328	0.846659	0.0722916
YBR096W		0.915751	-0.126973	0.846659	0.0722916
YML055W	SPC2	0.917431	-0.124328	0.846659	0.0722916
YHR042W	NCP1	0.918274	-0.123004	0.846659	0.0722916
YEL071W	DLD3	1.06383	0.0892673	0.846659	0.0722916
YDL021W	GPM2	1.07875	0.109359	0.848678	0.0712568
YHR005C-A	TIM10	1.0582	0.0816138	0.848678	0.0712568
YJL143W	TIM17	1.10742	0.147202	0.852277	0.0694193
YGR263C	SAY1	0.891266	-0.166073	0.852309	0.0694028
YLR177W		1.08108	0.112475	0.853484	0.0688047
YOL071W	SDH5	1.05932	0.0831412	0.853484	0.0688047
YNL217W		1.10988	0.150401	0.853484	0.0688047
YKL103C	APE1	1.05708	0.0800879	0.853484	0.0688047
YNL101W	AVT4	1.10742	0.147202	0.853484	0.0688047
YNL215W	IES2	1.08814	0.121863	0.853484	0.0688047
YKL034W	TUL1	1.07411	0.103147	0.853484	0.0688047
YJL197W	UBP12	0.918274	-0.123004	0.853484	0.0688047
YML056C	IMD4	0.919118	-0.121679	0.853484	0.0688047
YHR099W	TRA1	0.918274	-0.123004	0.853484	0.0688047
YDR060W	MAK21	0.919118	-0.121679	0.853755	0.068667
YCR076C	FUB1	1.07759	0.107803	0.856469	0.0672883
YKR036C	CAF4	1.08932	0.123434	0.856545	0.0672499
YKL126W	YPK1	0.919118	-0.121679	0.856816	0.0671125
YKR021W	ALY1	1.0929	0.128156	0.857658	0.0666858
YOR355W	GDS1	0.884956	-0.176323	0.857658	0.0666858
YLR187W	SKG3	0.906618	-0.141433	0.857658	0.0666858
YDR395W	SXM1	0.918274	-0.123004	0.857742	0.0666431
YBR029C	CDS1	0.919118	-0.121679	0.858276	0.0663732
YDR240C	SNU56	0.88968	-0.168642	0.863511	0.0637321
YGL107C	RMD9	1.07411	0.103147	0.863511	0.0637321
YNL157W	IGO1	1.05485	0.077041	0.863511	0.0637321
YBR170C	NPL4	1.10375	0.142417	0.863511	0.0637321
YFL028C	CAF16	0.888889	-0.169925	0.863511	0.0637321
YIL005W	EPS1	1.06383	0.0892673	0.863511	0.0637321
YPL144W	POC4	0.883392	-0.178874	0.863511	0.0637321
YAL043C	PTA1	0.919963	-0.120352	0.863511	0.0637321
YBL011W	SCT1	1.08108	0.112475	0.863511	0.0637321
YPR082C	DIB1	1.10497	0.14401	0.863511	0.0637321
YOR281C	PLP2	0.914913	-0.128293	0.864056	0.063458
YPR103W	PRE2	1.05708	0.0800879	0.864056	0.063458
YNL087W	TCB2	0.919963	-0.120352	0.864056	0.063458
YKL214C	YRA2	1.08108	0.112475	0.864817	0.063076
YMR308C	PSE1	0.92081	-0.119024	0.864867	0.0630507
YPR004C	AIM45	1.06383	0.0892673	0.865329	0.0628186
YCL031C	RRP7	0.919118	-0.121679	0.865429	0.0627687
YKL047W	ANR2	0.891266	-0.166073	0.865429	0.0627687
YOR083W	WHI5	1.08342	0.115597	0.865429	0.0627687
YOR099W	KTR1	1.05485	0.077041	0.865429	0.0627687
YGL212W	VAM7	1.11111	0.152003	0.865429	0.0627687
YDR310C	SUM1	0.884956	-0.176323	0.865429	0.0627687
YLR363W-A		1.07066	0.0985055	0.865429	0.0627687
YMR178W		1.0582	0.0816138	0.866209	0.0623774
YFL029C	CAK1	0.895255	-0.159629	0.866209	0.0623774
YHL007C	STE20	1.06157	0.086201	0.866209	0.0623774
YOR356W	CIR2	0.92081	-0.119024	0.866209	0.0623774
YER126C	NSA2	0.919963	-0.120352	0.866209	0.0623774
YHR135C	YCK1	0.912409	-0.132248	0.866209	0.0623774
YKR049C	FMP46	1.07066	0.0985055	0.866209	0.0623774
YPR008W	HAA1	1.07875	0.109359	0.866209	0.0623774
YBL099W	ATP1	0.921659	-0.117695	0.866209	0.0623774
YBR159W	IFA38	0.919963	-0.120352	0.866209	0.0623774
YBR145W	ADH5	1.0989	0.136062	0.866209	0.0623774
YOL064C	MET22	0.922509	-0.116365	0.866209	0.0623774
YOL111C	MDY2	1.05374	0.07552	0.866209	0.0623774
YBR088C	POL30	1.05374	0.07552	0.866209	0.0623774
YLR186W	EMG1	0.921659	-0.117695	0.866209	0.0623774
YOR360C	PDE2	1.10619	0.145605	0.866209	0.0623774
YMR060C	SAM37	0.921659	-0.117695	0.866209	0.0623774
YLR077W	FMP25	1.11607	0.158429	0.866209	0.0623774
YMR171C	EAR1	0.893655	-0.16221	0.866209	0.0623774
YOR171C	LCB4	1.06952	0.0969617	0.866209	0.0623774
YLR129W	DIP2	0.921659	-0.117695	0.866209	0.0623774
YBR039W	ATP3	0.92081	-0.119024	0.866209	0.0623774
YBR185C	MBA1	1.07759	0.107803	0.866209	0.0623774
YHR197W	RIX1	0.91659	-0.125651	0.866209	0.0623774
YPL010W	RET3	1.05485	0.077041	0.866209	0.0623774
YMR233W	TRI1	1.07875	0.109359	0.866209	0.0623774
YBL078C	ATG8	1.10375	0.142417	0.866209	0.0623774
YNL044W	YIP3	0.921659	-0.117695	0.866209	0.0623774
YDL213C	NOP6	1.05374	0.07552	0.866209	0.0623774
YML105C	SEC65	0.92081	-0.119024	0.866209	0.0623774
YLR441C	RPS1A	0.921659	-0.117695	0.866209	0.0623774
YIL130W	ASG1	1.05932	0.0831412	0.866209	0.0623774
YDL004W	ATP16	1.05374	0.07552	0.866209	0.0623774
YMR093W	UTP15	0.918274	-0.123004	0.866209	0.0623774
YHR143W-A	RPC10	1.06045	0.0846703	0.866209	0.0623774
YDL031W	DBP10	0.921659	-0.117695	0.866209	0.0623774
YPR161C	SGV1	0.919963	-0.120352	0.866209	0.0623774
YFR053C	HXK1	1.05374	0.07552	0.866209	0.0623774
YPL241C	CIN2	1.05932	0.0831412	0.866209	0.0623774
YKL057C	NUP120	1.07066	0.0985055	0.866209	0.0623774
YMR219W	ESC1	1.0582	0.0816138	0.866209	0.0623774
YOL016C	CMK2	0.909091	-0.137504	0.866209	0.0623774
YGL244W	RTF1	0.922509	-0.116365	0.866209	0.0623774
YMR283C	RIT1	1.10375	0.142417	0.866209	0.0623774
YBR058C	UBP14	0.909091	-0.137504	0.866209	0.0623774
YIR034C	LYS1	0.922509	-0.116365	0.866209	0.0623774
YBR023C	CHS3	0.904159	-0.145351	0.866209	0.0623774
YJR072C	NPA3	0.913242	-0.130931	0.866209	0.0623774
YBR193C	MED8	1.07296	0.101598	0.866209	0.0623774
YFL014W	HSP12	1.05485	0.077041	0.866209	0.0623774
YGR090W	UTP22	0.922509	-0.116365	0.866209	0.0623774
YJL020C	BBC1	1.05374	0.07552	0.866209	0.0623774
YHR058C	MED6	1.07411	0.103147	0.866209	0.0623774
YML017W	PSP2	1.05485	0.077041	0.866209	0.0623774
YNL133C	FYV6	1.0929	0.128156	0.866676	0.0621433
YER059W	PCL6	0.892061	-0.164786	0.866676	0.0621433
YDR388W	RVS167	1.05263	0.0740006	0.866676	0.0621433
YMR286W	MRPL33	1.05932	0.0831412	0.866676	0.0621433
YDR297W	SUR2	0.912409	-0.132248	0.866676	0.0621433
YKR080W	MTD1	1.0582	0.0816138	0.866676	0.0621433
YHR040W	BCD1	1.08696	0.120294	0.866676	0.0621433
YDR025W	RPS11B	0.922509	-0.116365	0.866676	0.0621433
YPR181C	SEC23	0.923361	-0.115033	0.866676	0.0621433
YAR042W	SWH1	0.911577	-0.133564	0.866676	0.0621433
YNR010W	CSE2	1.06838	0.0954196	0.866676	0.0621433
YCL017C	NFS1	0.919963	-0.120352	0.866676	0.0621433
YPL019C	VTC3	1.05263	0.0740006	0.866676	0.0621433
YOR332W	VMA4	1.05263	0.0740006	0.866676	0.0621433
YJL124C	LSM1	1.05263	0.0740006	0.866676	0.0621433
YGR024C	THG1	0.906618	-0.141433	0.867193	0.0618842
YGR060W	ERG25	1.08342	0.115597	0.86725	0.0618556
YMR238W	DFG5	0.92081	-0.119024	0.867364	0.0617987
YHR196W	UTP9	1.05374	0.07552	0.868018	0.0614714
YNL192W	CHS1	0.913242	-0.130931	0.868582	0.0611894
YNL288W	CAF40	0.92081	-0.119024	0.868582	0.0611894
YPR041W	TIF5	0.923361	-0.115033	0.868582	0.0611894
YPR074C	TKL1	0.923361	-0.115033	0.868582	0.0611894
YLR248W	RCK2	0.923361	-0.115033	0.868582	0.0611894
YLR005W	SSL1	1.1236	0.168123	0.868582	0.0611894
YGR244C	LSC2	1.05152	0.0724828	0.868582	0.0611894
YMR258C	ROY1	0.904159	-0.145351	0.869851	0.060555
YNL045W	LAP2	0.92081	-0.119024	0.869851	0.060555
YPL118W	MRP51	0.90009	-0.151859	0.870912	0.0600256
YLR369W	SSQ1	0.915751	-0.126973	0.870912	0.0600256
YLL043W	FPS1	0.917431	-0.124328	0.871467	0.059749
YJL130C	URA2	0.925926	-0.111031	0.871467	0.059749
YKR018C		1.05263	0.0740006	0.871467	0.059749
YBR267W	REI1	1.05374	0.07552	0.871467	0.059749
YDL019C	OSH2	0.924214	-0.1137	0.871467	0.059749
YMR197C	VTI1	1.11359	0.155213	0.871467	0.059749
YOR224C	RPB8	1.04932	0.0694519	0.871467	0.059749
YEL068C		0.92081	-0.119024	0.871467	0.059749
YGL181W	GTS1	1.04932	0.0694519	0.871467	0.059749
YIR024C	INA22	1.07759	0.107803	0.871467	0.059749
YEL002C	WBP1	1.05042	0.0709665	0.871467	0.059749
YLR082C	SRL2	1.07875	0.109359	0.871467	0.059749
YPL064C	CWC27	1.07527	0.104697	0.871467	0.059749
YJR089W	BIR1	1.08814	0.121863	0.871467	0.059749
YPR032W	SRO7	0.898473	-0.154454	0.871467	0.059749
YPL009C	RQC2	0.925926	-0.111031	0.871467	0.059749
YDR494W	RSM28	0.924214	-0.1137	0.871467	0.059749
YOR187W	TUF1	1.04932	0.0694519	0.871467	0.059749
YMR125W	STO1	0.924214	-0.1137	0.871467	0.059749
YKL120W	OAC1	1.10254	0.140826	0.871467	0.059749
YPL203W	TPK2	1.07991	0.110916	0.871467	0.059749
YPR128C	ANT1	1.07296	0.101598	0.871467	0.059749
YBR125C	PTC4	0.905797	-0.14274	0.871467	0.059749
YDR211W	GCD6	0.925069	-0.112367	0.871467	0.059749
YGL203C	KEX1	0.892061	-0.164786	0.871467	0.059749
YKL003C	MRP17	1.08342	0.115597	0.871467	0.059749
YHR028C	DAP2	0.92081	-0.119024	0.871467	0.059749
YOL011W	PLB3	1.08814	0.121863	0.871467	0.059749
YNR013C	PHO91	1.05263	0.0740006	0.871467	0.059749
YDR011W	SNQ2	0.921659	-0.117695	0.871467	0.059749
YHR069C	RRP4	1.0917	0.12658	0.871467	0.059749
YLR018C	POM34	0.925069	-0.112367	0.871467	0.059749
YHR121W	LSM12	0.925069	-0.112367	0.871467	0.059749
YNL071W	LAT1	0.925926	-0.111031	0.871467	0.059749
YHR202W		1.10988	0.150401	0.871467	0.059749
YGR128C	UTP8	0.924214	-0.1137	0.871467	0.059749
YGR237C		1.09051	0.125006	0.871467	0.059749
YGL161C	YIP5	0.896861	-0.157044	0.871467	0.059749
YKR020W	VPS51	1.04932	0.0694519	0.871467	0.059749
YHR190W	ERG9	0.924214	-0.1137	0.871467	0.059749
YMR079W	SEC14	1.04932	0.0694519	0.871467	0.059749
YER048W-A	ISD11	1.05042	0.0709665	0.871467	0.059749
YKL211C	TRP3	1.05042	0.0709665	0.871467	0.059749
YPR145W	ASN1	0.925926	-0.111031	0.871467	0.059749
YFR025C	HIS2	1.05374	0.07552	0.871467	0.059749
YOR340C	RPA43	1.04932	0.0694519	0.871467	0.059749
YDL202W	MRPL11	0.919963	-0.120352	0.871467	0.059749
YIR021W	MRS1	1.09051	0.125006	0.871467	0.059749
YGL195W	GCN1	0.924214	-0.1137	0.871467	0.059749
YDR460W	TFB3	1.06496	0.0908029	0.871467	0.059749
YDL003W	MCD1	1.0627	0.0877334	0.871467	0.059749
YOR074C	CDC21	1.06045	0.0846703	0.871467	0.059749
YNL212W	VID27	1.04932	0.0694519	0.871467	0.059749
YHR024C	MAS2	0.923361	-0.115033	0.871467	0.059749
YAL036C	RBG1	0.925926	-0.111031	0.871467	0.059749
YPL232W	SSO1	1.11732	0.16004	0.871467	0.059749
YDR436W	PPZ2	0.923361	-0.115033	0.871467	0.059749
YDR109C		1.08225	0.114035	0.871467	0.059749
YDR087C	RRP1	0.924214	-0.1137	0.871467	0.059749
YOR042W	CUE5	1.05042	0.0709665	0.871467	0.059749
YPR190C	RPC82	0.924214	-0.1137	0.871467	0.059749
YML008C	ERG6	0.924214	-0.1137	0.871467	0.059749
YGL020C	GET1	1.06496	0.0908029	0.871467	0.059749
Q0250	COX2	0.917431	-0.124328	0.871467	0.059749
YER008C	SEC3	1.08932	0.123434	0.871467	0.059749
YNL313C	EMW1	0.923361	-0.115033	0.871467	0.059749
YGR081C	SLX9	1.08108	0.112475	0.871467	0.059749
YER110C	KAP123	0.925926	-0.111031	0.871467	0.059749
YDR074W	TPS2	1.04822	0.0679388	0.871902	0.0595322
YAL049C	AIM2	1.05485	0.077041	0.872012	0.0594774
YNL175C	NOP13	0.926784	-0.109695	0.872012	0.0594774
YOL006C	TOP1	0.925926	-0.111031	0.872012	0.0594774
YDR357C	CNL1	1.07181	0.100051	0.872012	0.0594774
YKR083C	DAD2	1.0627	0.0877334	0.872012	0.0594774
YIL140W	AXL2	1.04932	0.0694519	0.872012	0.0594774
YGL221C	NIF3	0.926784	-0.109695	0.872012	0.0594774
YNL309W	STB1	1.0929	0.128156	0.872012	0.0594774
YGL172W	NUP49	0.925069	-0.112367	0.872012	0.0594774
YMR160W		0.90009	-0.151859	0.872012	0.0594774
YIL157C	COA1	1.0627	0.0877334	0.87286	0.0590555
YMR054W	STV1	0.924214	-0.1137	0.87336	0.0588069
YBR084W	MIS1	0.926784	-0.109695	0.874425	0.0582774
YER087C-B	SBH1	1.11235	0.153607	0.874425	0.0582774
YER137C		0.895255	-0.159629	0.874425	0.0582774
YNL026W	SAM50	0.919963	-0.120352	0.874425	0.0582774
YEL054C	RPL12A	1.04712	0.0664274	0.874589	0.058196
YNL126W	SPC98	0.925069	-0.112367	0.874589	0.058196
YGR019W	UGA1	1.04712	0.0664274	0.874589	0.058196
YAL026C	DRS2	1.06383	0.0892673	0.874589	0.058196
YOL093W	TRM10	0.925069	-0.112367	0.874589	0.058196
YDR452W	PPN1	1.04712	0.0664274	0.874589	0.058196
YLR275W	SMD2	1.05485	0.077041	0.874589	0.058196
YDR453C	TSA2	1.08578	0.118727	0.874589	0.058196
YJL060W	BNA3	0.925069	-0.112367	0.874589	0.058196
YMR217W	GUA1	0.927644	-0.108357	0.874589	0.058196
YJL173C	RFA3	0.927644	-0.108357	0.875462	0.0577628
YMR011W	HXT2	1.0627	0.0877334	0.875591	0.0576987
YLR268W	SEC22	0.92081	-0.119024	0.875591	0.0576987
YLR435W	TSR2	1.05152	0.0724828	0.875591	0.0576987
YDR120C	TRM1	0.927644	-0.108357	0.87671	0.057144
YML094W	GIM5	1.04712	0.0664274	0.87671	0.057144
YOR004W	UTP23	1.06838	0.0954196	0.877227	0.0568879
YEL058W	PCM1	0.925926	-0.111031	0.877227	0.0568879
YMR234W	RNH1	0.91659	-0.125651	0.877227	0.0568879
YGL008C	PMA1	0.927644	-0.108357	0.877227	0.0568879
YPR058W	YMC1	0.91659	-0.125651	0.877683	0.0566621
YCL016C	DCC1	0.92081	-0.119024	0.877683	0.0566621
YJL042W	MHP1	1.05263	0.0740006	0.877683	0.0566621
YDR434W	GPI17	0.925926	-0.111031	0.878048	0.0564815
YGR033C	TIM21	0.927644	-0.108357	0.878048	0.0564815
YER133W	GLC7	0.924214	-0.1137	0.878316	0.056349
YJR016C	ILV3	0.928505	-0.107018	0.878316	0.056349
YKL144C	RPC25	1.05152	0.0724828	0.880676	0.0551839
YBL051C	PIN4	1.04603	0.0649175	0.880676	0.0551839
YBR109C	CMD1	1.04603	0.0649175	0.880676	0.0551839
YPL046C	ELC1	1.04603	0.0649175	0.880676	0.0551839
YNL138W-A	YSF3	1.11235	0.153607	0.880959	0.0550445
YBL066C	SEF1	1.11235	0.153607	0.880959	0.0550445
YKL100C		1.05042	0.0709665	0.881591	0.054733
YOR336W	KRE5	1.06045	0.0846703	0.881591	0.054733
YAL029C	MYO4	0.925926	-0.111031	0.881591	0.054733
YOR086C	TCB1	0.928505	-0.107018	0.881591	0.054733
YBL076C	ILS1	0.928505	-0.107018	0.881591	0.054733
YDR075W	PPH3	0.925069	-0.112367	0.881591	0.054733
YDL097C	RPN6	0.928505	-0.107018	0.881591	0.054733
YER005W	YND1	1.11235	0.153607	0.881591	0.054733
YGL234W	ADE5	0.928505	-0.107018	0.881591	0.054733
YKL079W	SMY1	0.927644	-0.108357	0.882624	0.0542241
YKL014C	URB1	0.929368	-0.105678	0.883112	0.0539843
YMR278W	PRM15	0.927644	-0.108357	0.883112	0.0539843
		1.04493	0.0634092	0.883112	0.0539843
YPR122W	AXL1	0.904159	-0.145351	0.883112	0.0539843
YLR089C	ALT1	0.927644	-0.108357	0.883112	0.0539843
YBR279W	PAF1	1.04493	0.0634092	0.883112	0.0539843
YHR108W	GGA2	0.929368	-0.105678	0.883576	0.0537563
YDR057W	YOS9	1.0661	0.0923402	0.884379	0.0533616
YMR131C	RRB1	0.928505	-0.107018	0.884379	0.0533616
YER163C	GCG1	0.918274	-0.123004	0.884379	0.0533616
YDR231C	COX20	0.925926	-0.111031	0.884379	0.0533616
YMR152W	YIM1	0.928505	-0.107018	0.884473	0.0533155
YMR186W	HSC82	0.929368	-0.105678	0.884473	0.0533155
YMR262W		1.0627	0.0877334	0.886518	0.0523125
YMR272C	SCS7	0.928505	-0.107018	0.886518	0.0523125
YEL037C	RAD23	1.04932	0.0694519	0.886518	0.0523125
YKL112W	ABF1	1.04932	0.0694519	0.88696	0.0520961
YDR141C	DOP1	0.928505	-0.107018	0.887833	0.0516688
YOR272W	YTM1	0.930233	-0.104337	0.888024	0.0515753
YPL004C	LSP1	0.930233	-0.104337	0.888024	0.0515753
YPR113W	PIS1	0.92081	-0.119024	0.888024	0.0515753
YCL037C	SRO9	0.930233	-0.104337	0.888024	0.0515753
YER174C	GRX4	0.930233	-0.104337	0.888024	0.0515753
YNL002C	RLP7	0.930233	-0.104337	0.888024	0.0515753
YMR005W	TAF4	1.0627	0.0877334	0.888024	0.0515753
YMR277W	FCP1	1.0627	0.0877334	0.888024	0.0515753
YDR428C	BNA7	1.0661	0.0923402	0.888024	0.0515753
YLR108C		1.04822	0.0679388	0.888289	0.0514459
YCR004C	YCP4	1.04384	0.0619024	0.888474	0.0513555
YHR072W-A	NOP10	1.04384	0.0619024	0.888474	0.0513555
YER070W	RNR1	0.930233	-0.104337	0.888474	0.0513555
YBR215W	HPC2	0.914913	-0.128293	0.888474	0.0513555
YFR047C	BNA6	1.0582	0.0816138	0.888474	0.0513555
YMR120C	ADE17	1.05042	0.0709665	0.888474	0.0513555
YJL154C	VPS35	0.92081	-0.119024	0.888805	0.0511934
YHR019C	DED81	0.930233	-0.104337	0.888805	0.0511934
YHR152W	SPO12	1.08696	0.120294	0.889001	0.0510978
YNL323W	LEM3	1.10011	0.137648	0.889001	0.0510978
YNL137C	NAM9	0.928505	-0.107018	0.889001	0.0510978
YJR055W	HIT1	1.06157	0.086201	0.889001	0.0510978
YOL123W	HRP1	0.931099	-0.102994	0.889001	0.0510978
YPL135W	ISU1	1.06045	0.0846703	0.889001	0.0510978
YGR270W	YTA7	1.04822	0.0679388	0.889001	0.0510978
YMR016C	SOK2	1.0582	0.0816138	0.889001	0.0510978
YOR037W	CYC2	0.904977	-0.144046	0.889001	0.0510978
YLR432W	IMD3	0.931099	-0.102994	0.889001	0.0510978
YLR454W	FMP27	0.918274	-0.123004	0.889001	0.0510978
YPL097W	MSY1	0.906618	-0.141433	0.889063	0.0510676
YPR162C	ORC4	1.10619	0.145605	0.889781	0.050717
YMR288W	HSH155	0.925926	-0.111031	0.891727	0.0497682
YGR199W	PMT6	0.900901	-0.15056	0.891727	0.0497682
YHR020W		0.931099	-0.102994	0.891727	0.0497682
YGL236C	MTO1	1.10254	0.140826	0.891727	0.0497682
YCL045C	EMC1	0.931099	-0.102994	0.891727	0.0497682
YHR034C	PIH1	0.92081	-0.119024	0.891727	0.0497682
YGR185C	TYS1	0.931099	-0.102994	0.891727	0.0497682
YMR067C	UBX4	1.06157	0.086201	0.891727	0.0497682
YOR213C	SAS5	1.08696	0.120294	0.891727	0.0497682
YNR015W	SMM1	1.06496	0.0908029	0.891727	0.0497682
YJL087C	TRL1	0.930233	-0.104337	0.891782	0.0497414
YOR206W	NOC2	0.931966	-0.10165	0.896444	0.0474767
YPR115W	RGC1	0.921659	-0.117695	0.896444	0.0474767
YCL009C	ILV6	0.922509	-0.116365	0.896444	0.0474767
YGR163W	GTR2	1.04822	0.0679388	0.896444	0.0474767
YGL115W	SNF4	0.929368	-0.105678	0.896454	0.0474719
YDR137W	RGP1	0.922509	-0.116365	0.896475	0.0474616
YMR218C	TRS130	0.910747	-0.134878	0.896475	0.0474616
YBR289W	SNF5	1.07759	0.107803	0.896554	0.0474238
YDR172W	SUP35	0.931966	-0.10165	0.896554	0.0474238
YER057C	HMF1	1.04167	0.0588937	0.896554	0.0474238
YDL193W	NUS1	0.931099	-0.102994	0.896554	0.0474238
YCL032W	STE50	1.04603	0.0649175	0.896554	0.0474238
YBR078W	ECM33	0.931966	-0.10165	0.896554	0.0474238
YIL137C	TMA108	0.931966	-0.10165	0.896554	0.0474238
YDR398W	UTP5	0.930233	-0.104337	0.896964	0.0472249
YLR197W	NOP56	0.931966	-0.10165	0.896964	0.0472249
YGL223C	COG1	1.10132	0.139236	0.897209	0.0471064
YDR196C	CAB5	0.926784	-0.109695	0.897209	0.0471064
YER105C	NUP157	0.931966	-0.10165	0.897209	0.0471064
YLR277C	YSH1	1.09649	0.132894	0.898205	0.0466244
YCL029C	BIK1	1.04932	0.0694519	0.898205	0.0466244
YNL103W	MET4	1.05485	0.077041	0.899569	0.0459656
YCL044C	MGR1	0.931099	-0.102994	0.901125	0.0452151
YHR009C	TDA3	0.931966	-0.10165	0.901352	0.0451054
YBR106W	PHO88	0.932836	-0.100305	0.901352	0.0451054
YOR136W	IDH2	0.932836	-0.100305	0.901415	0.0450754
YHR187W	IKI1	0.932836	-0.100305	0.901415	0.0450754
YGL037C	PNC1	1.04167	0.0588937	0.901415	0.0450754
YDR365C	ESF1	0.931966	-0.10165	0.901845	0.0448682
YJL052W	TDH1	1.04058	0.0573917	0.901845	0.0448682
YER012W	PRE1	1.04058	0.0573917	0.901845	0.0448682
YCR073W-A	SOL2	1.04603	0.0649175	0.903325	0.0441561
YMR105C	PGM2	0.932836	-0.100305	0.903619	0.0440145
YBL022C	PIM1	0.932836	-0.100305	0.903672	0.043989
YKL212W	SAC1	0.933707	-0.0989585	0.903947	0.0438569
YLL015W	BPT1	1.07527	0.104697	0.903947	0.0438569
YBR229C	ROT2	1.0582	0.0816138	0.903947	0.0438569
YJL039C	NUP192	1.04058	0.0573917	0.904239	0.0437167
YFL017W-A	SMX2	1.04058	0.0573917	0.904341	0.0436677
YLR028C	ADE16	1.04058	0.0573917	0.904341	0.0436677
YOL142W	RRP40	1.05485	0.077041	0.904362	0.0436575
YHR027C	RPN1	0.933707	-0.0989585	0.904362	0.0436575
YOR375C	GDH1	0.933707	-0.0989585	0.904362	0.0436575
YGL190C	CDC55	0.930233	-0.104337	0.904362	0.0436575
YJL178C	ATG27	0.931099	-0.102994	0.904733	0.0434795
YKR067W	GPT2	1.04493	0.0634092	0.904769	0.0434623
YKR001C	VPS1	0.933707	-0.0989585	0.904981	0.0433605
YAL007C	ERP2	0.928505	-0.107018	0.904981	0.0433605
YKL035W	UGP1	0.933707	-0.0989585	0.904981	0.0433605
YBR260C	RGD1	0.933707	-0.0989585	0.904981	0.0433605
YAL053W	FLC2	0.931966	-0.10165	0.904981	0.0433605
YLR373C	VID22	1.06724	0.093879	0.904981	0.0433605
YDL029W	ARP2	0.933707	-0.0989585	0.904981	0.0433605
YNL069C	RPL16B	0.933707	-0.0989585	0.905502	0.0431106
YGR146C	ECL1	1.10011	0.137648	0.905879	0.0429297
YDR320C	SWA2	1.0395	0.0558912	0.905879	0.0429297
YJL115W	ASF1	1.04712	0.0664274	0.905879	0.0429297
YNL308C	KRI1	1.0395	0.0558912	0.905879	0.0429297
YPR060C	ARO7	1.04384	0.0619024	0.905879	0.0429297
YLR398C	SKI2	0.933707	-0.0989585	0.905879	0.0429297
YPL063W	TIM50	1.0395	0.0558912	0.906539	0.0426134
YGL091C	NBP35	1.04822	0.0679388	0.906539	0.0426134
YKL190W	CNB1	0.921659	-0.117695	0.906539	0.0426134
YAR002W	NUP60	1.0395	0.0558912	0.906539	0.0426134
YJL063C	MRPL8	0.914913	-0.128293	0.906539	0.0426134
YOR196C	LIP5	0.932836	-0.100305	0.906539	0.0426134
YLR172C	DPH5	0.934579	-0.0976108	0.906539	0.0426134
YGL049C	TIF4632	1.04384	0.0619024	0.906543	0.0426117
YJL005W	CYR1	0.931966	-0.10165	0.906543	0.0426117
YGL039W		1.05485	0.077041	0.907056	0.0423659
YBL033C	RIB1	0.933707	-0.0989585	0.909798	0.0410549
YDR064W	RPS13	0.934579	-0.0976108	0.909798	0.0410549
YFL005W	SEC4	0.934579	-0.0976108	0.909798	0.0410549
YPL152W	RRD2	1.08342	0.115597	0.910642	0.0406523
YFR021W	ATG18	1.0917	0.12658	0.91192	0.0400434
YKL179C	COY1	0.93633	-0.0949116	0.91192	0.0400434
YPL140C	MKK2	1.0582	0.0816138	0.91192	0.0400434
YNL102W	POL1	0.933707	-0.0989585	0.91192	0.0400434
YML125C	PGA3	0.935454	-0.0962619	0.91192	0.0400434
YNL164C	IBD2	0.926784	-0.109695	0.91192	0.0400434
YPL015C	HST2	1.0582	0.0816138	0.91192	0.0400434
YKL152C	GPM1	1.03842	0.0543923	0.912597	0.0397208
YLR219W	MSC3	1.08108	0.112475	0.912597	0.0397208
YJL061W	NUP82	0.93633	-0.0949116	0.912757	0.039645
YDL212W	SHR3	0.934579	-0.0976108	0.912757	0.039645
YOR310C	NOP58	0.935454	-0.0962619	0.912757	0.039645
YGL050W	TYW3	1.0395	0.0558912	0.912852	0.0395995
YER025W	GCD11	0.935454	-0.0962619	0.912852	0.0395995
YFL044C	OTU1	1.05263	0.0740006	0.912852	0.0395995
YOR327C	SNC2	0.926784	-0.109695	0.912852	0.0395995
YBL030C	PET9	0.935454	-0.0962619	0.913446	0.0393172
YPL082C	MOT1	0.934579	-0.0976108	0.913446	0.0393172
YHR037W	PUT2	0.935454	-0.0962619	0.913589	0.039249
YDR150W	NUM1	0.935454	-0.0962619	0.913589	0.039249
YOR319W	HSH49	1.08932	0.123434	0.914434	0.0388477
O77727	KRT15	0.909091	-0.137504	0.914434	0.0388477
YDR001C	NTH1	1.03734	0.0528949	0.914434	0.0388477
YML081C-A	ATP18	1.0395	0.0558912	0.914434	0.0388477
YBL069W	AST1	0.931099	-0.102994	0.914434	0.0388477
YJL104W	PAM16	1.03734	0.0528949	0.914434	0.0388477
YNL261W	ORC5	0.914077	-0.129613	0.914434	0.0388477
YGL160W	AIM14	0.911577	-0.133564	0.914434	0.0388477
YGR271C-A	EFG1	1.07759	0.107803	0.914488	0.038822
YDR101C	ARX1	0.93633	-0.0949116	0.914488	0.038822
YNL307C	MCK1	0.93633	-0.0949116	0.914982	0.0385873
YPL122C	TFB2	0.910747	-0.134878	0.914982	0.0385873
YFR015C	GSY1	0.914077	-0.129613	0.914982	0.0385873
YDR289C	RTT103	0.930233	-0.104337	0.914982	0.0385873
YHR133C	NSG1	0.935454	-0.0962619	0.914982	0.0385873
YER136W	GDI1	1.04275	0.0603973	0.915031	0.0385641
YJR041C	URB2	0.935454	-0.0962619	0.915843	0.0381792
YOR373W	NUD1	1.05152	0.0724828	0.915843	0.0381792
YJR133W	XPT1	1.09051	0.125006	0.915843	0.0381792
YJR002W	MPP10	0.93633	-0.0949116	0.915843	0.0381792
YNL134C		1.03734	0.0528949	0.915858	0.0381719
YPR135W	CTF4	1.04167	0.0588937	0.916596	0.0378219
YJL117W	PHO86	0.93633	-0.0949116	0.917158	0.0375556
YGL241W	KAP114	0.919963	-0.120352	0.917642	0.0373269
YNR051C	BRE5	0.937207	-0.0935602	0.917642	0.0373269
YFL041W	FET5	1.05485	0.077041	0.917642	0.0373269
YMR316W	DIA1	0.914077	-0.129613	0.917642	0.0373269
YOR188W	MSB1	0.933707	-0.0989585	0.917642	0.0373269
YJL148W	RPA34	0.938967	-0.0908534	0.917642	0.0373269
YGR120C	COG2	1.0661	0.0923402	0.917642	0.0373269
YNL216W	RAP1	0.934579	-0.0976108	0.917642	0.0373269
YOR021C	SFM1	1.0352	0.0499049	0.917642	0.0373269
YOL098C		0.937207	-0.0935602	0.917642	0.0373269
YPL146C	NOP53	0.937207	-0.0935602	0.917642	0.0373269
YDR266C	HEL2	0.924214	-0.1137	0.917642	0.0373269
YCR012W	PGK1	1.0352	0.0499049	0.917642	0.0373269
YBR263W	SHM1	0.937207	-0.0935602	0.917642	0.0373269
YGR241C	YAP1802	0.91659	-0.125651	0.917642	0.0373269
YNL218W	MGS1	1.07296	0.101598	0.917642	0.0373269
YAL019W	FUN30	0.93633	-0.0949116	0.917642	0.0373269
YML128C	MSC1	1.04493	0.0634092	0.917642	0.0373269
YHR083W	SAM35	1.08932	0.123434	0.917642	0.0373269
YDL195W	SEC31	0.938086	-0.0922074	0.917642	0.0373269
YML074C	FPR3	0.937207	-0.0935602	0.917642	0.0373269
YKR016W	MIC60	0.938967	-0.0908534	0.917642	0.0373269
YDR186C	SND1	1.07527	0.104697	0.917642	0.0373269
YNL085W	MKT1	0.938967	-0.0908534	0.917642	0.0373269
YBR164C	ARL1	1.03627	0.0513992	0.917642	0.0373269
YNL189W	SRP1	0.938086	-0.0922074	0.917642	0.0373269
YGL038C	OCH1	1.09051	0.125006	0.917642	0.0373269
YPR079W	MRL1	1.07527	0.104697	0.917642	0.0373269
YPL012W	RRP12	0.938086	-0.0922074	0.917642	0.0373269
YGR116W	SPT6	0.938086	-0.0922074	0.917642	0.0373269
YLR195C	NMT1	0.937207	-0.0935602	0.917642	0.0373269
YPL184C	MRN1	0.931099	-0.102994	0.917642	0.0373269
YDL137W	ARF2	1.03842	0.0543923	0.917642	0.0373269
YNL284C	MRPL10	0.938967	-0.0908534	0.917642	0.0373269
YDR472W	TRS31	1.08696	0.120294	0.917642	0.0373269
YBR041W	FAT1	0.938086	-0.0922074	0.917642	0.0373269
YJR070C	LIA1	1.0352	0.0499049	0.917642	0.0373269
YKR048C	NAP1	0.938967	-0.0908534	0.917642	0.0373269
YPR159W	KRE6	0.937207	-0.0935602	0.917642	0.0373269
YOL088C	MPD2	0.937207	-0.0935602	0.917642	0.0373269
YGL070C	RPB9	1.04932	0.0694519	0.917642	0.0373269
YJL180C	ATP12	0.928505	-0.107018	0.917642	0.0373269
YNL287W	SEC21	0.938086	-0.0922074	0.917642	0.0373269
YNL168C	FMP41	0.935454	-0.0962619	0.917642	0.0373269
YMR246W	FAA4	0.937207	-0.0935602	0.917642	0.0373269
YBR025C	OLA1	0.937207	-0.0935602	0.917642	0.0373269
YHR018C	ARG4	1.0352	0.0499049	0.917642	0.0373269
YOR227W	HER1	0.921659	-0.117695	0.917642	0.0373269
YNL186W	UBP10	0.938967	-0.0908534	0.917642	0.0373269
YOR211C	MGM1	1.0395	0.0558912	0.917642	0.0373269
YKL021C	MAK11	0.937207	-0.0935602	0.917642	0.0373269
YIL068C	SEC6	1.05374	0.07552	0.917642	0.0373269
YOR284W	HUA2	0.911577	-0.133564	0.917642	0.0373269
YKL216W	URA1	1.03627	0.0513992	0.917642	0.0373269
YJL109C	UTP10	0.937207	-0.0935602	0.917642	0.0373269
YOR098C	NUP1	0.93633	-0.0949116	0.917642	0.0373269
YGR218W	CRM1	0.938086	-0.0922074	0.917642	0.0373269
YER003C	PMI40	1.03627	0.0513992	0.917642	0.0373269
YDL159W	STE7	1.07643	0.106249	0.917642	0.0373269
Q0140	VAR1	0.918274	-0.123004	0.917642	0.0373269
YHL002W	HSE1	0.925926	-0.111031	0.917642	0.0373269
YNL123W	NMA111	0.938086	-0.0922074	0.917642	0.0373269
YLR245C	CDD1	1.0395	0.0558912	0.917642	0.0373269
YML129C	COX14	1.05485	0.077041	0.917642	0.0373269
YGL120C	PRP43	0.938967	-0.0908534	0.917642	0.0373269
YLR200W	YKE2	1.0352	0.0499049	0.917642	0.0373269
YDR168W	CDC37	1.03734	0.0528949	0.917642	0.0373269
YPL074W	YTA6	0.927644	-0.108357	0.917642	0.0373269
YDR353W	TRR1	1.03413	0.0484122	0.917675	0.0373113
YDR002W	YRB1	1.03413	0.0484122	0.917675	0.0373113
YPL043W	NOP4	0.938967	-0.0908534	0.917675	0.0373113
YML011C	RAD33	1.07181	0.100051	0.91855	0.0368972
YOR304C-A		1.03842	0.0543923	0.91855	0.0368972
YDR096W	GIS1	0.931966	-0.10165	0.91855	0.0368972
YDR505C	PSP1	1.04822	0.0679388	0.91855	0.0368972
YMR260C	TIF11	1.03413	0.0484122	0.918784	0.0367867
YPL111W	CAR1	0.938967	-0.0908534	0.918784	0.0367867
YLR106C	MDN1	0.938967	-0.0908534	0.918837	0.0367613
YLR069C	MEF1	0.938967	-0.0908534	0.919258	0.0365624
YDR337W	MRPS28	1.04822	0.0679388	0.919258	0.0365624
YER154W	OXA1	1.05374	0.07552	0.919258	0.0365624
YPR155C	NCA2	0.931966	-0.10165	0.919501	0.036448
YOL097C	WRS1	0.938967	-0.0908534	0.919805	0.0363042
YDR518W	EUG1	1.04712	0.0664274	0.919927	0.0362468
YMR073C	IRC21	0.931099	-0.102994	0.919927	0.0362468
YKR071C	DRE2	1.0352	0.0499049	0.920585	0.035936
YOR179C	SYC1	1.04932	0.0694519	0.920585	0.035936
YHR051W	COX6	1.03413	0.0484122	0.920645	0.0359079
YDR322W	MRPL35	0.938086	-0.0922074	0.921728	0.0353972
YGR261C	APL6	0.938086	-0.0922074	0.921728	0.0353972
YGL245W	GUS1	0.93985	-0.0894982	0.921948	0.0352936
YKR066C	CCP1	1.03306	0.046921	0.921948	0.0352936
YKL186C	MTR2	1.08578	0.118727	0.921948	0.0352936
YGR195W	SKI6	0.938086	-0.0922074	0.921948	0.0352936
YKL091C		0.93633	-0.0949116	0.922004	0.0352672
YDR293C	SSD1	0.938967	-0.0908534	0.922004	0.0352672
YNL243W	SLA2	1.03627	0.0513992	0.922004	0.0352672
YPL173W	MRPL40	0.937207	-0.0935602	0.922617	0.0349784
YAR007C	RFA1	0.93985	-0.0894982	0.922792	0.0348962
YDL174C	DLD1	0.93985	-0.0894982	0.922792	0.0348962
YLR075W	RPL10	0.93985	-0.0894982	0.922855	0.0348667
YLR448W	RPL6B	1.03306	0.046921	0.922947	0.0348233
YCR090C		0.938086	-0.0922074	0.922947	0.0348233
YNL209W	SSB2	0.93985	-0.0894982	0.922947	0.0348233
YBR069C	TAT1	1.06045	0.0846703	0.922947	0.0348233
YMR229C	RRP5	0.93985	-0.0894982	0.922947	0.0348233
YGL025C	PGD1	0.934579	-0.0976108	0.922947	0.0348233
YIL078W	THS1	0.940734	-0.0881416	0.922947	0.0348233
YGL233W	SEC15	1.05263	0.0740006	0.922947	0.0348233
YIL034C	CAP2	1.03306	0.046921	0.922947	0.0348233
YJR066W	TOR1	0.93985	-0.0894982	0.922947	0.0348233
YOR230W	WTM1	1.03306	0.046921	0.922947	0.0348233
YDR324C	UTP4	0.93985	-0.0894982	0.922947	0.0348233
YPL045W	VPS16	1.0846	0.117161	0.922947	0.0348233
YPR189W	SKI3	0.940734	-0.0881416	0.922947	0.0348233
YHR021C	RPS27B	1.03306	0.046921	0.92305	0.0347748
YLR134W	PDC5	0.937207	-0.0935602	0.924082	0.0342893
YNL030W	HHF1	0.940734	-0.0881416	0.924082	0.0342893
YPR098C		1.0627	0.0877334	0.924082	0.0342893
YGR130C		1.03306	0.046921	0.924082	0.0342893
YDR330W	UBX5	0.938967	-0.0908534	0.924082	0.0342893
YER095W	RAD51	0.919118	-0.121679	0.924082	0.0342893
YOR001W	RRP6	0.940734	-0.0881416	0.924082	0.0342893
YGR191W	HIP1	0.92081	-0.119024	0.924082	0.0342893
YML085C	TUB1	1.03199	0.0454314	0.924082	0.0342893
YMR250W	GAD1	0.940734	-0.0881416	0.924082	0.0342893
YPR051W	MAK3	0.938967	-0.0908534	0.924082	0.0342893
YKL067W	YNK1	1.03199	0.0454314	0.924082	0.0342893
YFR032C-A	RPL29	1.03199	0.0454314	0.924082	0.0342893
YPR188C	MLC2	1.03199	0.0454314	0.924082	0.0342893
YGL226C-A	OST5	0.934579	-0.0976108	0.924082	0.0342893
YJL033W	HCA4	0.940734	-0.0881416	0.924082	0.0342893
YHR074W	QNS1	0.940734	-0.0881416	0.92694	0.0329484
YHR001W-A	QCR10	1.03199	0.0454314	0.92694	0.0329484
YPL169C	MEX67	0.940734	-0.0881416	0.92694	0.0329484
YFL034W	MIL1	0.940734	-0.0881416	0.92694	0.0329484
YGR155W	CYS4	0.94162	-0.0867838	0.928231	0.032344
YKL145W	RPT1	0.942507	-0.0854247	0.930319	0.0313682
YDR404C	RPB7	0.923361	-0.115033	0.930319	0.0313682
YMR235C	RNA1	0.942507	-0.0854247	0.930319	0.0313682
YDL140C	RPO21	0.943396	-0.0840643	0.930319	0.0313682
YOR280C	FSH3	1.04167	0.0588937	0.930319	0.0313682
YIL007C	NAS2	0.93633	-0.0949116	0.930319	0.0313682
YHR076W	PTC7	1.04275	0.0603973	0.930319	0.0313682
YKL029C	MAE1	0.940734	-0.0881416	0.930319	0.0313682
YDR035W	ARO3	1.03093	0.0439433	0.930319	0.0313682
YLR207W	HRD3	1.04932	0.0694519	0.930319	0.0313682
YEL066W	HPA3	1.02987	0.0424568	0.930319	0.0313682
YDR298C	ATP5	1.03093	0.0439433	0.930319	0.0313682
YBR265W	TSC10	0.944287	-0.0827026	0.930319	0.0313682
YDR036C	EHD3	1.04712	0.0664274	0.930319	0.0313682
YMR300C	ADE4	0.94162	-0.0867838	0.930319	0.0313682
YBL068W	PRS4	0.94162	-0.0867838	0.930319	0.0313682
YKR078W		1.07066	0.0985055	0.930319	0.0313682
YGR194C	XKS1	0.932836	-0.100305	0.930319	0.0313682
YMR285C	NGL2	1.08108	0.112475	0.930319	0.0313682
YKL022C	CDC16	1.0582	0.0816138	0.930319	0.0313682
YEL048C	TCA17	1.04932	0.0694519	0.930319	0.0313682
YKL073W	LHS1	0.94162	-0.0867838	0.930319	0.0313682
YMR296C	LCB1	0.938086	-0.0922074	0.930319	0.0313682
YMR039C	SUB1	1.03306	0.046921	0.930319	0.0313682
YLR086W	SMC4	1.04822	0.0679388	0.930319	0.0313682
YNL088W	TOP2	0.943396	-0.0840643	0.930319	0.0313682
YLR153C	ACS2	0.942507	-0.0854247	0.930319	0.0313682
YGR124W	ASN2	0.942507	-0.0854247	0.930319	0.0313682
YML064C	TEM1	1.06383	0.0892673	0.930319	0.0313682
YBL018C	POP8	1.03093	0.0439433	0.930319	0.0313682
YDR449C	UTP6	0.943396	-0.0840643	0.930319	0.0313682
YHR010W	RPL27A	0.942507	-0.0854247	0.930319	0.0313682
YJR134C	SGM1	1.03413	0.0484122	0.930319	0.0313682
YOL127W	RPL25	0.943396	-0.0840643	0.930319	0.0313682
YBR112C	CYC8	1.03306	0.046921	0.930319	0.0313682
YNL245C	CWC25	1.05152	0.0724828	0.930319	0.0313682
YOL145C	CTR9	0.942507	-0.0854247	0.930319	0.0313682
YPR088C	SRP54	0.942507	-0.0854247	0.930319	0.0313682
YJR010C-A	SPC1	0.926784	-0.109695	0.930319	0.0313682
YBR189W	RPS9B	0.94162	-0.0867838	0.930319	0.0313682
YKL157W	APE2	0.94162	-0.0867838	0.930319	0.0313682
YHR136C	SPL2	0.943396	-0.0840643	0.930319	0.0313682
YDR139C	RUB1	1.0352	0.0499049	0.930319	0.0313682
YJR103W	URA8	0.942507	-0.0854247	0.930319	0.0313682
YLL018C	DPS1	0.942507	-0.0854247	0.930319	0.0313682
YJR022W	LSM8	1.0846	0.117161	0.930319	0.0313682
YJL217W	REE1	1.02987	0.0424568	0.930319	0.0313682
YOL094C	RFC4	0.943396	-0.0840643	0.930319	0.0313682
YOR245C	DGA1	0.93633	-0.0949116	0.930319	0.0313682
YIL133C	RPL16A	0.942507	-0.0854247	0.930319	0.0313682
YLR119W	SRN2	1.03627	0.0513992	0.930319	0.0313682
YJL062W-A	COA3	0.925069	-0.112367	0.930319	0.0313682
YEL043W		1.0627	0.0877334	0.930319	0.0313682
YJR017C	ESS1	1.03413	0.0484122	0.930319	0.0313682
YIL039W	TED1	0.946074	-0.0799754	0.930319	0.0313682
YLR206W	ENT2	0.93985	-0.0894982	0.930319	0.0313682
YPR172W		1.03413	0.0484122	0.930319	0.0313682
YER078C	ICP55	1.04275	0.0603973	0.930319	0.0313682
YBL057C	PTH2	0.943396	-0.0840643	0.930319	0.0313682
YGR169C-A	LSO2	0.94162	-0.0867838	0.930319	0.0313682
YBR198C	TAF5	0.942507	-0.0854247	0.930319	0.0313682
YHR049W	FSH1	0.94162	-0.0867838	0.930319	0.0313682
YPL050C	MNN9	1.03199	0.0454314	0.930319	0.0313682
YGR173W	RBG2	0.942507	-0.0854247	0.930319	0.0313682
YMR075W	RCO1	0.938086	-0.0922074	0.930319	0.0313682
YCR069W	CPR4	0.940734	-0.0881416	0.930349	0.0313542
YMR047C	NUP116	0.943396	-0.0840643	0.930396	0.0313321
YBR028C	YPK3	1.0582	0.0816138	0.930927	0.0310845
YMR183C	SSO2	1.02881	0.0409718	0.932002	0.0305834
YMR147W		1.04058	0.0573917	0.932146	0.0305159
YPL083C	SEN54	0.942507	-0.0854247	0.932284	0.0304518
YDR358W	GGA1	1.04167	0.0588937	0.932284	0.0304518
YGR002C	SWC4	1.04058	0.0573917	0.932655	0.0302791
YDR006C	SOK1	0.938967	-0.0908534	0.933598	0.02984
YDR021W	FAL1	1.0582	0.0816138	0.933777	0.0297567
YNL180C	RHO5	1.03413	0.0484122	0.93396	0.0296715
YER143W	DDI1	1.0395	0.0558912	0.93396	0.0296715
YGR192C	TDH3	1.02881	0.0409718	0.93396	0.0296715
YCR084C	TUP1	1.02881	0.0409718	0.93396	0.0296715
YOR018W	ROD1	0.929368	-0.105678	0.93396	0.0296715
YPL154C	PEP4	1.02881	0.0409718	0.93396	0.0296715
YGR202C	PCT1	0.944287	-0.0827026	0.93396	0.0296715
YDL198C	GGC1	0.944287	-0.0827026	0.93396	0.0296715
YGR135W	PRE9	1.02881	0.0409718	0.93396	0.0296715
YIL129C	TAO3	1.06045	0.0846703	0.93396	0.0296715
YJR015W		0.928505	-0.107018	0.93396	0.0296715
YJL166W	QCR8	0.944287	-0.0827026	0.93396	0.0296715
YKR065C	PAM17	1.05374	0.07552	0.934257	0.0295335
YDR392W	SPT3	1.05042	0.0709665	0.934679	0.0293376
YOR090C	PTC5	0.93985	-0.0894982	0.934679	0.0293376
YOR222W	ODC2	0.93985	-0.0894982	0.934679	0.0293376
YOR204W	DED1	0.944287	-0.0827026	0.934679	0.0293376
YDR328C	SKP1	1.02881	0.0409718	0.934679	0.0293376
YGL005C	COG7	0.943396	-0.0840643	0.934679	0.0293376
YBR200W	BEM1	1.0395	0.0558912	0.934679	0.0293376
YDR529C	QCR7	1.02775	0.0394883	0.934679	0.0293376
YDR283C	GCN2	0.940734	-0.0881416	0.934679	0.0293376
YML120C	NDI1	0.943396	-0.0840643	0.934679	0.0293376
YDR500C	RPL37B	1.02775	0.0394883	0.934679	0.0293376
YCR053W	THR4	0.94518	-0.0813396	0.935713	0.0288574
YHR060W	VMA22	1.0661	0.0923402	0.935985	0.0287313
YMR237W	BCH1	1.03199	0.0454314	0.936127	0.0286652
YIL063C	YRB2	1.02775	0.0394883	0.936797	0.0283545
YGR211W	ZPR1	0.94518	-0.0813396	0.936797	0.0283545
YJR005W	APL1	0.944287	-0.0827026	0.936797	0.0283545
YBR079C	RPG1	0.94518	-0.0813396	0.936797	0.0283545
YOL147C	PEX11	0.944287	-0.0827026	0.937116	0.0282066
YDR135C	YCF1	0.94518	-0.0813396	0.937116	0.0282066
YHR003C	TCD1	0.94518	-0.0813396	0.937364	0.0280919
YLR438W	CAR2	0.944287	-0.0827026	0.937364	0.0280919
YOR120W	GCY1	1.07643	0.106249	0.937364	0.0280919
YHL004W	MRP4	1.03199	0.0454314	0.937754	0.0279112
YDR389W	SAC7	1.07296	0.101598	0.937754	0.0279112
YIL093C	RSM25	1.0395	0.0558912	0.938744	0.0274528
YLR259C	HSP60	1.02669	0.0380063	0.939101	0.0272877
YKL068W	NUP100	0.94518	-0.0813396	0.939526	0.0270913
YPL115C	BEM3	1.03093	0.0439433	0.939842	0.0269451
YCR027C	RHB1	0.940734	-0.0881416	0.939842	0.0269451
YPR176C	BET2	0.931099	-0.102994	0.939842	0.0269451
YML109W	ZDS2	0.926784	-0.109695	0.939842	0.0269451
YOL059W	GPD2	1.02669	0.0380063	0.939842	0.0269451
YML123C	PHO84	0.94518	-0.0813396	0.939842	0.0269451
YGL137W	SEC27	0.946074	-0.0799754	0.939842	0.0269451
YPL227C	ALG5	0.947867	-0.077243	0.939842	0.0269451
YDR251W	PAM1	0.942507	-0.0854247	0.939842	0.0269451
YMR089C	YTA12	1.03199	0.0454314	0.939842	0.0269451
YOR226C	ISU2	1.04384	0.0619024	0.939842	0.0269451
YOR069W	VPS5	0.946074	-0.0799754	0.939886	0.0269248
YPR091C	NVJ2	1.02775	0.0394883	0.939886	0.0269248
YDL014W	NOP1	0.947867	-0.077243	0.939959	0.0268911
YLR351C	NIT3	0.94697	-0.0786098	0.939959	0.0268911
YPL127C	HHO1	1.02564	0.0365259	0.939959	0.0268911
YLL048C	YBT1	0.947867	-0.077243	0.939959	0.0268911
YKR037C	SPC34	1.04822	0.0679388	0.939959	0.0268911
YKL106W	AAT1	1.03842	0.0543923	0.939959	0.0268911
YMR236W	TAF9	1.02459	0.0350469	0.939959	0.0268911
YOR184W	SER1	0.948767	-0.0758749	0.939959	0.0268911
YDR143C	SAN1	1.05152	0.0724828	0.939959	0.0268911
YML110C	COQ5	0.944287	-0.0827026	0.939959	0.0268911
YPR020W	ATP20	0.948767	-0.0758749	0.939959	0.0268911
YKL025C	PAN3	1.04275	0.0603973	0.939959	0.0268911
YML048W	GSF2	0.947867	-0.077243	0.939959	0.0268911
YDL161W	ENT1	0.948767	-0.0758749	0.939959	0.0268911
YGL103W	RPL28	0.947867	-0.077243	0.939959	0.0268911
YKL092C	BUD2	0.942507	-0.0854247	0.939959	0.0268911
YPR010C	RPA135	0.948767	-0.0758749	0.939959	0.0268911
YDL064W	UBC9	1.02881	0.0409718	0.939959	0.0268911
YNL267W	PIK1	1.04493	0.0634092	0.939959	0.0268911
YLR450W	HMG2	0.947867	-0.077243	0.939959	0.0268911
YOR096W	RPS7A	1.02564	0.0365259	0.939959	0.0268911
YBL036C		1.02459	0.0350469	0.939959	0.0268911
YGR285C	ZUO1	0.947867	-0.077243	0.939959	0.0268911
YKR026C	GCN3	0.947867	-0.077243	0.939959	0.0268911
YBL029C-A		1.06838	0.0954196	0.939959	0.0268911
YGR251W	NOP19	1.03734	0.0528949	0.939959	0.0268911
YNL055C	POR1	0.94697	-0.0786098	0.939959	0.0268911
YPR182W	SMX3	1.05597	0.0785637	0.939959	0.0268911
YDL042C	SIR2	0.94518	-0.0813396	0.939959	0.0268911
YPR137W	RRP9	0.948767	-0.0758749	0.939959	0.0268911
YMR014W	BUD22	0.94518	-0.0813396	0.939959	0.0268911
YDR390C	UBA2	0.947867	-0.077243	0.939959	0.0268911
YPR034W	ARP7	1.06838	0.0954196	0.939959	0.0268911
YNL149C	PGA2	1.02669	0.0380063	0.939959	0.0268911
YKL204W	EAP1	1.02775	0.0394883	0.939959	0.0268911
YDL182W	LYS20	0.947867	-0.077243	0.939959	0.0268911
YOL066C	RIB2	1.05932	0.0831412	0.939959	0.0268911
YHR039C	MSC7	1.0352	0.0499049	0.939959	0.0268911
YMR304W	UBP15	0.947867	-0.077243	0.939959	0.0268911
YNR047W	FPK1	1.03413	0.0484122	0.939959	0.0268911
YER164W	CHD1	1.02775	0.0394883	0.939959	0.0268911
YGL047W	ALG13	0.94697	-0.0786098	0.939959	0.0268911
YNL330C	RPD3	0.948767	-0.0758749	0.939959	0.0268911
YNL260C	LTO1	0.946074	-0.0799754	0.939959	0.0268911
YJL080C	SCP160	0.947867	-0.077243	0.939959	0.0268911
YHR117W	TOM71	0.948767	-0.0758749	0.939959	0.0268911
YPL181W	CTI6	1.07296	0.101598	0.939959	0.0268911
YOR175C	ALE1	0.933707	-0.0989585	0.939959	0.0268911
YGR005C	TFG2	0.948767	-0.0758749	0.939959	0.0268911
YDR286C		0.948767	-0.0758749	0.939959	0.0268911
YGR180C	RNR4	1.02669	0.0380063	0.939959	0.0268911
YGR148C	RPL24B	1.02564	0.0365259	0.939959	0.0268911
YLR384C	IKI3	0.948767	-0.0758749	0.939959	0.0268911
YMR315W		1.02564	0.0365259	0.939959	0.0268911
YMR226C		0.94697	-0.0786098	0.939959	0.0268911
YDL018C	ERP3	0.94697	-0.0786098	0.939959	0.0268911
YBR080C	SEC18	0.94697	-0.0786098	0.939959	0.0268911
YKR095W	MLP1	0.948767	-0.0758749	0.939959	0.0268911
YER027C	GAL83	1.02881	0.0409718	0.939959	0.0268911
YJR131W	MNS1	0.946074	-0.0799754	0.939959	0.0268911
YLR056W	ERG3	0.946074	-0.0799754	0.939959	0.0268911
YBR221C	PDB1	1.02564	0.0365259	0.939959	0.0268911
YDR430C	CYM1	0.94697	-0.0786098	0.939959	0.0268911
YLR413W		1.03734	0.0528949	0.939959	0.0268911
YJR144W	MGM101	0.948767	-0.0758749	0.939959	0.0268911
YNR038W	DBP6	1.03199	0.0454314	0.939959	0.0268911
YPL262W	FUM1	0.94697	-0.0786098	0.939959	0.0268911
YOL081W	IRA2	0.942507	-0.0854247	0.939959	0.0268911
YGL198W	YIP4	0.943396	-0.0840643	0.939959	0.0268911
YJL196C	ELO1	1.03734	0.0528949	0.939959	0.0268911
YKL032C	IXR1	0.948767	-0.0758749	0.939959	0.0268911
YLR305C	STT4	0.94697	-0.0786098	0.939959	0.0268911
YGR162W	TIF4631	0.948767	-0.0758749	0.939959	0.0268911
YLR193C	UPS1	1.06383	0.0892673	0.939959	0.0268911
YNR043W	MVD1	1.02564	0.0365259	0.939959	0.0268911
YML086C	ALO1	0.947867	-0.077243	0.939959	0.0268911
YLR058C	SHM2	1.02354	0.0335695	0.939959	0.0268911
YGL123W	RPS2	0.94697	-0.0786098	0.939959	0.0268911
YNL138W	SRV2	0.94697	-0.0786098	0.939959	0.0268911
YOR367W	SCP1	0.929368	-0.105678	0.939959	0.0268911
YBR258C	SHG1	1.02775	0.0394883	0.939959	0.0268911
YDR381W	YRA1	0.94697	-0.0786098	0.939959	0.0268911
YER156C		1.02459	0.0350469	0.939959	0.0268911
YFL048C	EMP47	0.948767	-0.0758749	0.940383	0.0266954
YHR062C	RPP1	0.946074	-0.0799754	0.940758	0.0265219
YOL080C	REX4	0.948767	-0.0758749	0.940758	0.0265219
YKL019W	RAM2	0.949668	-0.0745054	0.940758	0.0265219
YDR183W	PLP1	1.04058	0.0573917	0.940915	0.0264495
YBR281C	DUG2	1.02354	0.0335695	0.940935	0.0264402
YPR133C	SPN1	0.95057	-0.0731347	0.941147	0.0263428
YEL050C	RML2	0.935454	-0.0962619	0.941147	0.0263428
YNL271C	BNI1	0.95057	-0.0731347	0.941147	0.0263428
YLR324W	PEX30	0.933707	-0.0989585	0.942113	0.0258971
YBR121C	GRS1	0.949668	-0.0745054	0.942113	0.0258971
YLR116W	MSL5	0.94697	-0.0786098	0.942194	0.0258599
YCL040W	GLK1	1.02249	0.0320936	0.942194	0.0258599
YPL106C	SSE1	0.949668	-0.0745054	0.942194	0.0258599
YLR300W	EXG1	1.02249	0.0320936	0.942194	0.0258599
YMR318C	ADH6	1.02354	0.0335695	0.942194	0.0258599
YFR034C	PHO4	1.02881	0.0409718	0.942335	0.0257947
YER023W	PRO3	1.02249	0.0320936	0.94241	0.0257601
YOR128C	ADE2	0.949668	-0.0745054	0.942977	0.0254988
YNL091W	NST1	0.946074	-0.0799754	0.942977	0.0254988
YML098W	TAF13	1.04603	0.0649175	0.942977	0.0254988
YLR337C	VRP1	0.93985	-0.0894982	0.942977	0.0254988
YBL085W	BOI1	0.948767	-0.0758749	0.943611	0.0252069
YPR132W	RPS23B	0.949668	-0.0745054	0.943611	0.0252069
YPL210C	SRP72	0.949668	-0.0745054	0.943611	0.0252069
YNL220W	ADE12	0.949668	-0.0745054	0.943611	0.0252069
YMR216C	SKY1	0.948767	-0.0758749	0.943611	0.0252069
YIL109C	SEC24	0.949668	-0.0745054	0.943611	0.0252069
YDR165W	TRM82	0.95057	-0.0731347	0.943827	0.0251075
YOR167C	RPS28A	1.02145	0.0306192	0.943827	0.0251075
YML126C	ERG13	0.951475	-0.0717627	0.943827	0.0251075
YDR440W	DOT1	0.940734	-0.0881416	0.943827	0.0251075
YKL140W	TGL1	0.95057	-0.0731347	0.943827	0.0251075
YOR259C	RPT4	1.02041	0.0291463	0.943827	0.0251075
YHR088W	RPF1	0.952381	-0.0703893	0.943827	0.0251075
YOR094W	ARF3	1.03093	0.0439433	0.943827	0.0251075
YJR033C	RAV1	1.05263	0.0740006	0.943827	0.0251075
YDL208W	NHP2	1.02041	0.0291463	0.943827	0.0251075
YMR143W	RPS16B	0.952381	-0.0703893	0.943827	0.0251075
YCR036W	RBK1	1.03093	0.0439433	0.943827	0.0251075
YGR254W	ENO1	1.02249	0.0320936	0.943827	0.0251075
YBL061C	SKT5	0.952381	-0.0703893	0.943827	0.0251075
YMR008C	PLB1	1.03627	0.0513992	0.943827	0.0251075
YOL018C	TLG2	0.95057	-0.0731347	0.943827	0.0251075
YGL141W	HUL5	0.94518	-0.0813396	0.943827	0.0251075
YNR022C	MRPL50	1.02041	0.0291463	0.943827	0.0251075
YPL249C-A	RPL36B	0.951475	-0.0717627	0.943827	0.0251075
YKL196C	YKT6	1.02145	0.0306192	0.943827	0.0251075
YLR229C	CDC42	1.04603	0.0649175	0.943827	0.0251075
YPR166C	MRP2	1.03627	0.0513992	0.943827	0.0251075
YDR229W	IVY1	1.03306	0.046921	0.943827	0.0251075
YDR372C	VPS74	1.0352	0.0499049	0.943827	0.0251075
YJL198W	PHO90	1.02354	0.0335695	0.943827	0.0251075
YJR047C	ANB1	1.06157	0.086201	0.943827	0.0251075
YER043C	SAH1	0.95057	-0.0731347	0.943827	0.0251075
YML030W	RCF1	1.03413	0.0484122	0.943827	0.0251075
YDR458C	HEH2	0.952381	-0.0703893	0.943827	0.0251075
YIL162W	SUC2	1.03734	0.0528949	0.943827	0.0251075
YKL203C	TOR2	0.938967	-0.0908534	0.943827	0.0251075
[truncated: 1,047 more rows]
