# Supplementary material for: Variation in ubiquitin system genes creates substrate-specific effects on proteasomal protein degradation
Source: eLife. 2022 Oct 11;11:e79570. doi: 10.7554/eLife.79570 (PMC9634822; doi:10.7554/eLife.79570)
Supplement: Figure 5—source data 2. [file elife-79570-fig5-data2.xlsx]

## Sheet: Sheet1
geneID	gene_name	fold_change	log2_fold_change	padj	log10_padj
YGR138C	TPO2	0.658571	-0.602588	1.91162e-25	24.7186
YBR296C	PHO89	1.58653	0.665872	1.83988e-21	20.7352
YGR142W	BTN2	0.688266	-0.538963	5.19689e-19	18.2843
YBR054W	YRO2	0.73988	-0.434636	4.30431e-12	11.3661
YCR021C	HSP30	0.711985	-0.490082	1.59757e-11	10.7965
YDR222W		0.763797	-0.388738	9.69161e-10	9.0136
YPL250C	ICY2	0.764821	-0.386806	3.27094e-09	8.48533
YJL144W		0.805676	-0.311729	1.27488e-05	4.89453
YER103W	SSA4	0.825409	-0.276819	4.36863e-05	4.35965
YOL014W		0.809792	-0.304377	5.88e-05	4.23062
YBR072W	HSP26	0.813763	-0.297319	5.88e-05	4.23062
YBR297W	MAL33	1.21864	0.285275	0.000169889	3.76984
YBR101C	FES1	0.838598	-0.253949	0.000831181	3.0803
YLR327C	TMA10	1.18505	0.24495	0.00223917	2.64991
YIL057C	RGI2	1.22133	0.288448	0.00224658	2.64848
YPL014W		0.840046	-0.251461	0.00224658	2.64848
YJL034W	KAR2	0.851515	-0.231895	0.00305099	2.51556
YER053C-A		0.831996	-0.265352	0.00440767	2.35579
YDL048C	STP4	0.830209	-0.268454	0.00640862	2.19324
YMR250W	GAD1	0.849956	-0.234539	0.00640862	2.19324
YHR136C	SPL2	1.17991	0.238681	0.00673033	2.17196
YPL240C	HSP82	0.852673	-0.229936	0.00673033	2.17196
YDR533C	HSP31	0.851916	-0.231217	0.00673033	2.17196
YDR536W	STL1	1.20401	0.267847	0.00715398	2.14545
YGL008C	PMA1	0.862251	-0.213821	0.00804595	2.09442
YNL077W	APJ1	0.852078	-0.230943	0.0116185	1.93485
YPL054W	LEE1	1.16598	0.221549	0.0117458	1.93012
YPL274W	SAM3	0.861702	-0.214739	0.0128419	1.89137
YGR250C		0.863631	-0.211513	0.0128678	1.8905
YFL066C		0.836455	-0.25764	0.0132231	1.87867
YLR121C	YPS3	0.858177	-0.220652	0.0132565	1.87757
YDR070C	FMP16	0.855952	-0.224398	0.0146381	1.83452
YDR453C	TSA2	0.859066	-0.219159	0.0146381	1.83452
YCL036W	GFD2	0.858725	-0.219731	0.0146381	1.83452
YJL052W	TDH1	0.865574	-0.208271	0.0146381	1.83452
YMR011W	HXT2	1.18232	0.241618	0.0176057	1.75435
YKL163W	PIR3	0.863034	-0.212511	0.0199265	1.70057
YBR050C	REG2	1.16838	0.224506	0.0206107	1.68591
YLR267W	BOP2	1.17453	0.232084	0.0216981	1.66358
YOR032C	HMS1	0.844296	-0.24418	0.0216981	1.66358
YGR248W	SOL4	0.865122	-0.209024	0.0224496	1.64879
YER130C	COM2	0.867067	-0.205785	0.0225819	1.64624
YMR280C	CAT8	1.15479	0.207628	0.0225819	1.64624
YBR238C		0.862888	-0.212754	0.0225819	1.64624
YDR433W		0.8652	-0.208894	0.0237269	1.62476
YGR211W	ZPR1	0.870527	-0.200038	0.0259489	1.58588
YLL024C	SSA2	0.874352	-0.193714	0.0276846	1.55776
YBL030C	PET9	0.874141	-0.194062	0.0277008	1.55751
YGR052W	FMP48	0.849611	-0.235125	0.0277008	1.55751
YLL028W	TPO1	0.870184	-0.200608	0.0283767	1.54704
YDL079C	MRK1	1.14476	0.195039	0.0283767	1.54704
YGR184C	UBR1	0.87802	-0.187674	0.0365946	1.43658
YMR095C	SNO1	1.17389	0.231294	0.0365946	1.43658
YKL029C	MAE1	0.873096	-0.195788	0.0369813	1.43202
YOL109W	ZEO1	0.874967	-0.192699	0.0369813	1.43202
YJR046W	TAH11	0.87077	-0.199636	0.0369813	1.43202
YLR297W		0.864302	-0.210392	0.0409979	1.38724
YPR157W	TDA6	0.869844	-0.201171	0.0409979	1.38724
YBL069W	AST1	0.873638	-0.194893	0.0443835	1.35278
YGL121C	GPG1	0.867606	-0.204888	0.0443835	1.35278
YHR177W		0.854688	-0.22653	0.0444458	1.35217
YNL160W	YGP1	0.876533	-0.190119	0.0456022	1.34101
YHR094C	HXT1	1.13298	0.18012	0.0456022	1.34101
YKL109W	HAP4	0.879342	-0.185504	0.0486746	1.3127
YJR096W		0.880794	-0.183124	0.0486746	1.3127
YER188W		0.870661	-0.199818	0.0494094	1.30619
YLR311C		1.16627	0.221896	0.0494094	1.30619
YBL099W	ATP1	0.882865	-0.179736	0.0498002	1.30277
YNL007C	SIS1	0.883618	-0.178505	0.0518124	1.28557
YLR264W	RPS28B	0.882475	-0.180373	0.0540586	1.26713
YER065C	ICL1	1.1378	0.186249	0.0578217	1.23791
YPL247C		0.880084	-0.184287	0.0593465	1.2266
YGR279C	SCW4	0.885023	-0.176213	0.0593465	1.2266
YDR040C	ENA1	1.13427	0.181764	0.0629376	1.20109
YMR136W	GAT2	0.883945	-0.177971	0.0712632	1.14713
YLR149C		1.13033	0.176745	0.0789778	1.10249
YER150W	SPI1	0.884439	-0.177165	0.0837673	1.07693
YNL190W		0.884918	-0.176385	0.0837673	1.07693
YOR237W	HES1	1.15079	0.202625	0.103794	0.983829
YJR121W	ATP2	0.890818	-0.166797	0.111601	0.952331
YGL062W	PYC1	0.889352	-0.169174	0.113108	0.946507
YLR044C	PDC1	0.889932	-0.168232	0.115399	0.937798
YHL036W	MUP3	0.889364	-0.169154	0.123337	0.908906
YPR158W	CUR1	0.884357	-0.1773	0.125279	0.902122
YOR233W	KIN4	1.12703	0.172521	0.125331	0.901942
YMR090W		0.889559	-0.168838	0.14011	0.853531
YNL134C		0.89152	-0.165661	0.14011	0.853531
YOL052C-A	DDR2	0.872002	-0.197596	0.14011	0.853531
YDR247W	VHS1	0.886302	-0.174129	0.14011	0.853531
YLR109W	AHP1	0.89664	-0.157399	0.148267	0.828954
YOR310C	NOP58	0.896943	-0.156911	0.153296	0.81447
YGL096W	TOS8	0.888188	-0.171064	0.158579	0.799754
YGR067C		1.13449	0.182044	0.160188	0.795369
YKL054C	DEF1	1.11273	0.154099	0.162578	0.788938
YHR071W	PCL5	1.11511	0.157189	0.167425	0.776179
YKL026C	GPX1	0.890429	-0.167427	0.167425	0.776179
YER037W	PHM8	0.895086	-0.159902	0.167425	0.776179
YNR055C	HOL1	0.895399	-0.159397	0.167425	0.776179
YOR317W	FAA1	0.898256	-0.154802	0.168006	0.774676
YDR258C	HSP78	0.897625	-0.155815	0.173937	0.759607
YAL005C	SSA1	0.900176	-0.151721	0.176813	0.752486
YOR239W	ABP140	1.11925	0.162538	0.176813	0.752486
YOR338W		0.881835	-0.18142	0.176813	0.752486
YOR348C	PUT4	1.12379	0.168368	0.190961	0.719055
YKR042W	UTH1	0.898798	-0.153932	0.193211	0.713968
YCL025C	AGP1	1.10885	0.149059	0.194327	0.711467
YNR053C	NOG2	0.895226	-0.159676	0.194327	0.711467
YCR010C	ADY2	1.13875	0.187452	0.200515	0.697854
YDL204W	RTN2	0.882135	-0.180929	0.200515	0.697854
YML012W	ERV25	0.900822	-0.150686	0.200515	0.697854
YBR230C	OM14	1.11376	0.155437	0.201704	0.695285
YOR066W	MSA1	0.896803	-0.157137	0.208908	0.680045
YAL034C	FUN19	0.896942	-0.156914	0.225522	0.646811
YKL151C		0.899958	-0.152071	0.225522	0.646811
YIR034C	LYS1	1.10897	0.149227	0.225522	0.646811
YHR054C		1.11967	0.163068	0.225522	0.646811
YGR088W	CTT1	0.885858	-0.174853	0.233874	0.631017
YDR216W	ADR1	1.11145	0.152443	0.233874	0.631017
YGL215W	CLG1	0.900562	-0.151102	0.233874	0.631017
YCL037C	SRO9	0.893711	-0.16212	0.233874	0.631017
YOL101C	IZH4	1.11447	0.156358	0.233874	0.631017
YCL017C	NFS1	1.11171	0.152781	0.238822	0.621926
YGR249W	MGA1	0.898649	-0.154171	0.243887	0.612811
YPR127W		0.90034	-0.151458	0.243887	0.612811
YDR171W	HSP42	0.902519	-0.147971	0.243887	0.612811
YDR523C	SPS1	1.12739	0.172981	0.243887	0.612811
YJR045C	SSC1	0.903638	-0.146184	0.247501	0.606424
YDL129W		0.896243	-0.158039	0.249343	0.603203
YLR076C		0.886068	-0.174511	0.25074	0.600776
YOR134W	BAG7	0.897375	-0.156217	0.25074	0.600776
YPL234C	VMA11	0.903989	-0.145623	0.25074	0.600776
YDR011W	SNQ2	1.11028	0.150921	0.25074	0.600776
YBL015W	ACH1	0.902161	-0.148543	0.265733	0.575555
YFL014W	HSP12	0.887199	-0.17267	0.265733	0.575555
YER060W	FCY21	0.901526	-0.14956	0.270671	0.567559
YDL214C	PRR2	1.12422	0.168924	0.270671	0.567559
YBL049W	MOH1	0.891607	-0.16552	0.272217	0.565085
YOR226C	ISU2	0.899642	-0.152577	0.272217	0.565085
YMR169C	ALD3	0.888569	-0.170444	0.273617	0.562857
YMR271C	URA10	0.901081	-0.150272	0.273617	0.562857
YOL158C	ENB1	0.906037	-0.142358	0.273617	0.562857
YDR475C	JIP4	0.902768	-0.147574	0.273617	0.562857
YBL039C	URA7	0.90329	-0.146739	0.273617	0.562857
YIR033W	MGA2	1.10336	0.141908	0.273617	0.562857
YKL051W	SFK1	0.90343	-0.146515	0.274615	0.561277
YOL032W	OPI10	0.905679	-0.142928	0.290592	0.536717
YOR204W	DED1	0.906358	-0.141848	0.290592	0.536717
YDL131W	LYS21	1.10617	0.145578	0.290592	0.536717
YDR033W	MRH1	0.906926	-0.140943	0.292531	0.533828
YLR321C	SFH1	1.10636	0.145821	0.29827	0.52539
YOR270C	VPH1	0.907281	-0.140378	0.301414	0.520837
YMR319C	FET4	0.905113	-0.14383	0.302271	0.519604
YOR306C	MCH5	0.903947	-0.14569	0.306433	0.513664
YAR071W	PHO11	1.11189	0.153015	0.306433	0.513664
YML031W	NDC1	1.10647	0.145966	0.308856	0.510243
YOR374W	ALD4	1.10338	0.141936	0.31338	0.503928
YGL080W	MPC1	1.1047	0.143659	0.31338	0.503928
YLL026W	HSP104	0.910424	-0.135389	0.31338	0.503928
YOL019W		1.10311	0.141582	0.31338	0.503928
YNL140C		1.11061	0.151357	0.31338	0.503928
YBL085W	BOI1	1.10306	0.141514	0.317611	0.498104
YHR033W		1.10462	0.143546	0.317611	0.498104
YJR103W	URA8	0.906944	-0.140915	0.319415	0.495645
YDR052C	DBF4	1.10282	0.141195	0.319794	0.49513
YKL078W	DHR2	0.901721	-0.149247	0.319794	0.49513
YDL183C		1.1082	0.148215	0.334225	0.475961
YLR154W-C	TAR1	0.890987	-0.166524	0.334225	0.475961
YEL017C-A	PMP2	0.907656	-0.139783	0.335464	0.474354
YER053C	PIC2	0.910959	-0.134542	0.335464	0.474354
YLR063W	BMT6	0.894089	-0.16151	0.342631	0.465174
YLR285C-A		1.12021	0.163767	0.342631	0.465174
YHR174W	ENO2	0.911002	-0.134473	0.346612	0.460156
YML009W-B		0.901801	-0.149119	0.346682	0.460069
YOR267C	HRK1	0.910159	-0.135809	0.346682	0.460069
YMR205C	PFK2	0.909711	-0.136519	0.346682	0.460069
YNR034W-A		0.909964	-0.136119	0.350662	0.455111
YBR299W	MAL32	1.11267	0.154024	0.359379	0.444448
YER088C	DOT6	0.909521	-0.136821	0.359379	0.444448
YLL053C		0.90165	-0.14936	0.359379	0.444448
YNL302C	RPS19B	0.911702	-0.133365	0.38454	0.415059
YDR073W	SNF11	1.10101	0.138821	0.392239	0.406449
YIR035C		0.911424	-0.133806	0.392239	0.406449
YGR177C	ATF2	1.10067	0.138386	0.392239	0.406449
YIL109C	SEC24	0.911128	-0.134274	0.392577	0.406075
YFL054C		1.09686	0.133385	0.394754	0.403674
YOR018W	ROD1	1.09641	0.132785	0.395689	0.402645
YNL339C	YRF1-6	0.895968	-0.158482	0.40098	0.396877
YER165W	PAB1	0.91252	-0.132072	0.401223	0.396615
YPL113C		1.10719	0.146908	0.401577	0.396232
YIL162W	SUC2	1.11403	0.155786	0.404979	0.392568
YLR174W	IDP2	1.10274	0.141087	0.404979	0.392568
YOR120W	GCY1	0.912101	-0.132735	0.404979	0.392568
YDR389W	SAC7	1.0998	0.137238	0.412835	0.384224
YBR148W	YSW1	1.1025	0.140775	0.41954	0.377227
YLR278C		0.912993	-0.131325	0.421911	0.374779
YOL126C	MDH2	1.09772	0.134508	0.426474	0.370108
YOR382W	FIT2	1.10818	0.148191	0.426919	0.369655
YPL061W	ALD6	1.0971	0.133693	0.427472	0.369092
YLL061W	MMP1	1.1131	0.154577	0.435443	0.361069
YKR096W	ESL2	1.09492	0.130832	0.448104	0.348621
YDR385W	EFT2	0.918572	-0.122535	0.448104	0.348621
YPR065W	ROX1	0.913293	-0.130851	0.448104	0.348621
YOR019W		1.09583	0.13202	0.448104	0.348621
YBR059C	AKL1	1.09076	0.125337	0.47411	0.324121
YMR084W		0.905626	-0.143013	0.478259	0.320337
YBR294W	SUL1	1.1086	0.148744	0.478259	0.320337
YDL080C	THI3	1.09249	0.127619	0.495206	0.305214
YLR206W	ENT2	1.08956	0.123749	0.499806	0.301198
YOL100W	PKH2	1.09397	0.129567	0.502766	0.298634
YPL156C	PRM4	1.09765	0.134416	0.510204	0.292256
YML100W	TSL1	0.91632	-0.126076	0.510204	0.292256
YDL140C	RPO21	0.917845	-0.123678	0.510204	0.292256
YPL058C	PDR12	0.915313	-0.127662	0.510204	0.292256
YLL052C	AQY2	0.905668	-0.142946	0.510204	0.292256
YCL043C	PDI1	0.917228	-0.124648	0.510562	0.291952
YJR159W	SOR1	1.10854	0.148665	0.510562	0.291952
YDL185W	VMA1	0.919445	-0.121165	0.510562	0.291952
YDR055W	PST1	0.917709	-0.123891	0.515317	0.287926
YEL053C	MAK10	1.09299	0.128281	0.517419	0.286158
YPL093W	NOG1	0.918633	-0.12244	0.522402	0.281995
YBR169C	SSE2	0.920107	-0.120126	0.522402	0.281995
YDR251W	PAM1	1.08804	0.121727	0.524721	0.280072
YOL007C	CSI2	1.09317	0.128516	0.524857	0.279959
YDR407C	TRS120	1.09105	0.125723	0.531176	0.274762
YOL016C	CMK2	0.917214	-0.12467	0.531562	0.274446
YPR005C	HAL1	1.09603	0.132285	0.533487	0.272876
YIL123W	SIM1	0.917877	-0.123627	0.533487	0.272876
YKR098C	UBP11	1.08929	0.12339	0.537061	0.269976
YMR096W	SNZ1	1.09249	0.12762	0.537061	0.269976
YEL063C	CAN1	1.09084	0.125441	0.546365	0.262517
YOR323C	PRO2	1.08925	0.123341	0.546365	0.262517
YCR017C	CWH43	0.920349	-0.119747	0.546365	0.262517
YPR156C	TPO3	0.919375	-0.121275	0.546365	0.262517
YBR187W	GDT1	0.920937	-0.118826	0.549643	0.25992
YOR385W		0.917951	-0.12351	0.551021	0.258832
YKL043W	PHD1	0.916992	-0.125018	0.552354	0.257783
YHR068W	DYS1	0.920883	-0.11891	0.552354	0.257783
YOR063W	RPL3	0.918925	-0.121981	0.554835	0.255836
YBR208C	DUR1	2	1.10664	0.146189	0.572077	0.242546
YOR302W		1.10148	0.139442	0.572199	0.242453
YGR243W	MPC3	1.106	0.145352	0.572199	0.242453
YLR340W	RPP0	0.921106	-0.118561	0.572199	0.242453
YLR083C	EMP70	0.922049	-0.117085	0.572199	0.242453
YPL067C		0.915271	-0.12773	0.572199	0.242453
YPL057C	SUR1	1.08985	0.12413	0.572199	0.242453
YPR173C	VPS4	0.921223	-0.118377	0.572199	0.242453
YKL123W		1.10087	0.138648	0.572199	0.242453
YDL077C	VAM6	1.08908	0.123115	0.572199	0.242453
YHR026W	VMA16	0.920846	-0.118968	0.572199	0.242453
YGR030C	POP6	1.09376	0.129297	0.572199	0.242453
YFR028C	CDC14	1.08891	0.12289	0.576937	0.238872
YDR072C	IPT1	1.08738	0.120853	0.577133	0.238724
YMR003W	AIM34	1.09298	0.128272	0.577566	0.238398
YLR378C	SEC61	0.920135	-0.120083	0.577566	0.238398
YMR116C	ASC1	0.922279	-0.116726	0.58041	0.236265
YLR450W	HMG2	1.08759	0.121134	0.58041	0.236265
YML099C	ARG81	1.08884	0.122794	0.58041	0.236265
YGR266W		1.08709	0.120475	0.58041	0.236265
YNL336W	COS1	0.918823	-0.12214	0.582898	0.234407
YKR091W	SRL3	0.918516	-0.122623	0.582898	0.234407
YML117W	NAB6	1.08436	0.116847	0.582898	0.234407
YDR047W	HEM12	0.922874	-0.115795	0.582898	0.234407
YJL020C	BBC1	0.920786	-0.119062	0.583572	0.233906
YOL121C	RPS19A	0.922834	-0.115857	0.588211	0.230467
YDL133C-A	RPL41B	0.921085	-0.118595	0.590007	0.229143
YPR030W	CSR2	1.08955	0.123733	0.592166	0.227557
YOL087C	DUF1	1.08314	0.11522	0.592166	0.227557
YGR118W	RPS23A	0.92019	-0.119996	0.594616	0.225764
YER003C	PMI40	1.08606	0.119103	0.594616	0.225764
YMR232W	FUS2	1.09676	0.133248	0.594616	0.225764
YOR207C	RET1	0.923485	-0.11484	0.594616	0.225764
YDR192C	NUP42	1.08835	0.122139	0.597143	0.223921
YKL152C	GPM1	0.924714	-0.112921	0.597143	0.223921
YMR183C	SSO2	0.922966	-0.11565	0.597143	0.223921
YEL040W	UTR2	1.08528	0.118072	0.597143	0.223921
YPR145C-A		0.90795	-0.139315	0.605141	0.218143
YPL265W	DIP5	1.10143	0.139372	0.605141	0.218143
YNL183C	NPR1	1.09881	0.135945	0.605141	0.218143
YKR097W	PCK1	1.09511	0.131078	0.605141	0.218143
YDR528W	HLR1	1.09412	0.129774	0.605141	0.218143
YLL063C	AYT1	1.09231	0.127377	0.605141	0.218143
YMR089C	YTA12	0.923416	-0.114947	0.620714	0.207108
YML094W	GIM5	1.08373	0.116	0.623355	0.205265
YPL186C	UIP4	0.92121	-0.118399	0.625271	0.203932
YBR120C	CBP6	1.08673	0.119991	0.629809	0.200791
YIL047C	SYG1	0.924557	-0.113165	0.630166	0.200545
YBR210W	ERV15	1.08505	0.117766	0.635288	0.197029
YDR344C		1.10085	0.138618	0.645064	0.190397
YJR127C	RSF2	0.925213	-0.112143	0.646091	0.189706
YPR154W	PIN3	0.922523	-0.116344	0.646091	0.189706
YJL133C-A		1.09155	0.126375	0.646091	0.189706
YBR183W	YPC1	0.924116	-0.113855	0.646091	0.189706
YBR108W	AIM3	0.920814	-0.119018	0.646091	0.189706
YGR254W	ENO1	0.927545	-0.10851	0.646091	0.189706
YEL027W	VMA3	0.926814	-0.109648	0.646091	0.189706
YOR287C	RRP36	0.919103	-0.121702	0.646091	0.189706
YLR136C	TIS11	1.09048	0.124966	0.646091	0.189706
YDR330W	UBX5	1.08146	0.112976	0.646091	0.189706
YMR291W	TDA1	1.08311	0.115184	0.646091	0.189706
YPR132W	RPS23B	0.921837	-0.117416	0.646091	0.189706
YGR018C		1.09764	0.134401	0.646091	0.189706
YJL212C	OPT1	0.924918	-0.112602	0.646091	0.189706
YDL159W	STE7	1.08598	0.118994	0.646091	0.189706
YNL093W	YPT53	0.914914	-0.128291	0.646091	0.189706
YDL174C	DLD1	1.08147	0.112999	0.646091	0.189706
YDR298C	ATP5	0.926281	-0.110478	0.646091	0.189706
YMR237W	BCH1	1.08296	0.114981	0.646091	0.189706
YOL155C	HPF1	0.918342	-0.122897	0.646091	0.189706
YDL124W		0.926621	-0.109948	0.646091	0.189706
YAR002W	NUP60	1.08427	0.116728	0.646091	0.189706
YML123C	PHO84	1.08242	0.11426	0.646091	0.189706
YGR122W		1.08222	0.113995	0.646091	0.189706
YGL224C	SDT1	1.08196	0.113647	0.646091	0.189706
YNL239W	LAP3	1.08263	0.114545	0.646091	0.189706
YHR025W	THR1	0.922442	-0.11647	0.646091	0.189706
YDR299W	BFR2	0.92297	-0.115644	0.646091	0.189706
YDR232W	HEM1	0.922921	-0.115721	0.646091	0.189706
YDL014W	NOP1	0.922892	-0.115767	0.647662	0.188652
YBR222C	PCS60	1.08198	0.113668	0.649974	0.187104
YML081W	TDA9	1.08127	0.112733	0.649974	0.187104
YML130C	ERO1	0.925461	-0.111756	0.653178	0.184968
YDR384C	ATO3	0.924147	-0.113806	0.653178	0.184968
YLR153C	ACS2	1.08024	0.111349	0.653178	0.184968
YBR182C	SMP1	0.917863	-0.12365	0.659163	0.181007
YMR199W	CLN1	1.0853	0.118094	0.66145	0.179503
YDR043C	NRG1	0.922261	-0.116754	0.661882	0.179219
YHR137W	ARO9	1.08689	0.120203	0.664135	0.177744
YLL032C		1.08487	0.117516	0.664135	0.177744
YDR541C		1.0865	0.119687	0.665374	0.176934
YNL162W-A		0.910821	-0.134761	0.666897	0.175941
YOR371C	GPB1	0.92474	-0.11288	0.669145	0.17448
YOR083W	WHI5	0.922668	-0.116117	0.672473	0.172325
YDR301W	CFT1	1.0795	0.110361	0.674688	0.170897
YGR292W	MAL12	1.09261	0.127778	0.674688	0.170897
YAL037C-B		0.9141	-0.129576	0.674688	0.170897
YGL045W	RIM8	0.923184	-0.11531	0.674688	0.170897
YPR112C	MRD1	0.926397	-0.110298	0.674688	0.170897
YGL160W	AIM14	1.08284	0.114824	0.674688	0.170897
YDR508C	GNP1	1.08022	0.111323	0.674688	0.170897
YNL274C	GOR1	0.925523	-0.111659	0.678215	0.168633
YPR185W	ATG13	1.07837	0.108854	0.681526	0.166517
YOR025W	HST3	1.08224	0.114015	0.685134	0.164224
YKL171W	NNK1	1.08164	0.113217	0.685134	0.164224
YBR005W	RCR1	0.926314	-0.110426	0.685134	0.164224
YEL055C	POL5	0.929053	-0.106168	0.685134	0.164224
YPR044C	OPI11	0.914532	-0.128894	0.685134	0.164224
YMR052C-A		1.09306	0.128379	0.685134	0.164224
YML133C		0.92606	-0.110823	0.685134	0.164224
YJL171C		0.926634	-0.109928	0.688269	0.162242
YGR061C	ADE6	0.929524	-0.105436	0.692188	0.159776
YJL101C	GSH1	0.92749	-0.108597	0.692188	0.159776
YHL026C		0.921533	-0.117893	0.692188	0.159776
YDR106W	ARP10	1.09316	0.128505	0.692188	0.159776
YPL026C	SKS1	1.08248	0.114345	0.692188	0.159776
YDR050C	TPI1	0.928109	-0.107634	0.692188	0.159776
YMR307W	GAS1	0.930651	-0.103687	0.693487	0.158962
YOR396W	YRF1-8	0.928228	-0.107449	0.704167	0.152324
YPR091C	NVJ2	1.0783	0.108754	0.704167	0.152324
YNL132W	KRE33	0.927106	-0.109194	0.704167	0.152324
YJL222W	VTH2	0.92594	-0.11101	0.704167	0.152324
YNL241C	ZWF1	0.927644	-0.108357	0.704167	0.152324
YIL055C		1.08057	0.111795	0.704167	0.152324
YLR467W	YRF1-5	0.928228	-0.107449	0.704167	0.152324
YGL173C	XRN1	0.929808	-0.104995	0.704167	0.152324
YNL124W	NAF1	0.923013	-0.115577	0.704167	0.152324
YHR096C	HXT5	1.08706	0.120434	0.704167	0.152324
YLR026C	SED5	1.07949	0.110352	0.704167	0.152324
YDR545W	YRF1-1	0.928228	-0.107449	0.704167	0.152324
YJR119C	JHD2	1.08186	0.11352	0.704167	0.152324
YJL159W	HSP150	0.927202	-0.109044	0.704167	0.152324
YOR349W	CIN1	1.08205	0.113763	0.708959	0.149379
YNR001C	CIT1	0.929694	-0.105172	0.708959	0.149379
YKR092C	SRP40	0.929645	-0.105248	0.712456	0.147242
YNR048W		1.08087	0.112195	0.715216	0.145563
YOR326W	MYO2	0.930638	-0.103708	0.715216	0.145563
YOR065W	CYT1	0.928377	-0.107218	0.715292	0.145516
YAL038W	CDC19	0.929221	-0.105906	0.71585	0.145178
YGR281W	YOR1	0.93086	-0.103364	0.717688	0.144064
YDL130W	RPP1B	0.928124	-0.10761	0.717688	0.144064
YBR173C	UMP1	1.07462	0.103822	0.717688	0.144064
YER138W-A		1.09028	0.124704	0.717688	0.144064
YGR059W	SPR3	0.916335	-0.126053	0.717688	0.144064
YHR036W	BRL1	1.08145	0.112967	0.717688	0.144064
YKR039W	GAP1	1.09127	0.12601	0.717688	0.144064
YBR132C	AGP2	1.07895	0.109627	0.717688	0.144064
YMR277W	FCP1	0.927576	-0.108463	0.717688	0.144064
YLR401C	DUS3	0.927718	-0.108242	0.717688	0.144064
YNR016C	ACC1	0.931244	-0.102769	0.717688	0.144064
YNL311C	SKP2	1.0774	0.107557	0.717688	0.144064
YJR161C	COS5	0.92814	-0.107586	0.717688	0.144064
YML056C	IMD4	0.931057	-0.103059	0.717688	0.144064
YDR239C		1.07832	0.108791	0.717688	0.144064
YOL072W	THP1	1.08015	0.111234	0.717688	0.144064
YMR290C	HAS1	1.07602	0.105706	0.717688	0.144064
YBR114W	RAD16	0.928969	-0.106297	0.718739	0.143429
YCR012W	PGK1	0.931531	-0.102324	0.718739	0.143429
YNL045W	LAP2	0.930635	-0.103713	0.718739	0.143429
YLR189C	ATG26	0.930487	-0.103942	0.718739	0.143429
YNL267W	PIK1	1.07716	0.107229	0.718739	0.143429
YIL045W	PIG2	0.926831	-0.109622	0.718739	0.143429
YNL064C	YDJ1	0.931257	-0.102749	0.720774	0.142201
YPR116W	RRG8	0.920416	-0.119641	0.720971	0.142082
YLR291C	GCD7	1.07401	0.103008	0.720971	0.142082
YER025W	GCD11	0.93302	-0.10002	0.721165	0.141965
YJL042W	MHP1	0.93062	-0.103736	0.721165	0.141965
YJR122W	IBA57	1.07693	0.10692	0.721165	0.141965
YHR047C	AAP1	0.931881	-0.101782	0.721165	0.141965
YLL009C	COX17	1.07701	0.107032	0.721165	0.141965
YNL236W	SIN4	1.0748	0.104074	0.721165	0.141965
YJL143W	TIM17	0.932301	-0.101132	0.721165	0.141965
YOR049C	RSB1	1.08092	0.11226	0.721165	0.141965
YCR018C	SRD1	1.07724	0.107339	0.721165	0.141965
YPL112C	PEX25	1.0738	0.102723	0.721165	0.141965
YNL071W	LAT1	0.93198	-0.101629	0.721165	0.141965
YOL002C	IZH2	1.07322	0.101945	0.721165	0.141965
YGR157W	CHO2	0.933396	-0.0994385	0.721165	0.141965
YDR081C	PDC2	1.07609	0.105792	0.721165	0.141965
YOL039W	RPP2A	0.930644	-0.103699	0.721165	0.141965
YNL061W	NOP2	0.929768	-0.105057	0.721165	0.141965
YNL191W	DUG3	0.928051	-0.107723	0.721165	0.141965
YMR172W	HOT1	1.07617	0.105912	0.721165	0.141965
YCL054W	SPB1	0.930178	-0.104421	0.728476	0.137584
YLR142W	PUT1	1.08127	0.112726	0.728476	0.137584
YHR020W		1.07241	0.10086	0.732352	0.13528
YGR068C	ART5	0.929406	-0.10562	0.733354	0.134686
YPL078C	ATP4	0.933433	-0.0993819	0.737526	0.132222
YML034W	SRC1	0.931928	-0.101709	0.737526	0.132222
YLR237W	THI7	0.928523	-0.106991	0.737526	0.132222
YHL033C	RPL8A	0.933763	-0.0988715	0.737526	0.132222
YOL058W	ARG1	1.0733	0.102052	0.737526	0.132222
YJR143C	PMT4	0.931576	-0.102255	0.737526	0.132222
YER119C	AVT6	0.928986	-0.106272	0.737526	0.132222
YHL016C	DUR3	1.08795	0.121617	0.737526	0.132222
YOL141W	PPM2	0.923845	-0.114278	0.737526	0.132222
YKR031C	SPO14	1.07204	0.100362	0.737526	0.132222
YLR413W	INA1	1.07438	0.103509	0.737526	0.132222
YHL027W	RIM101	1.07345	0.102249	0.737526	0.132222
YBR126C	TPS1	0.932707	-0.100505	0.737526	0.132222
YOR211C	MGM1	1.07288	0.101493	0.737526	0.132222
YBR147W	RTC2	1.07454	0.103713	0.737526	0.132222
YBR121C	GRS1	0.934184	-0.098222	0.737526	0.132222
YKR099W	BAS1	1.07476	0.104009	0.737526	0.132222
YMR083W	ADH3	0.934307	-0.098031	0.737526	0.132222
YMR105C	PGM2	0.930192	-0.104399	0.737526	0.132222
YGL156W	AMS1	1.07517	0.104559	0.737526	0.132222
YDR492W	IZH1	1.07425	0.10333	0.737526	0.132222
YPL031C	PHO85	1.07406	0.103079	0.739266	0.131199
YKL044W		0.920636	-0.119297	0.740949	0.130212
YML051W	GAL80	1.07556	0.105084	0.742983	0.129021
YML076C	WAR1	1.07322	0.101948	0.751608	0.124009
YAL012W	CYS3	0.932986	-0.100073	0.751608	0.124009
YGR161W-C		1.07732	0.107454	0.751608	0.124009
YBR138C		1.07628	0.106059	0.751608	0.124009
YOL105C	WSC3	1.07495	0.104265	0.751608	0.124009
YOL059W	GPD2	0.932767	-0.100411	0.751608	0.124009
YFR047C	BNA6	0.933886	-0.0986823	0.751608	0.124009
YCR068W	ATG15	0.930742	-0.103547	0.752389	0.123558
YNL139C	THO2	1.07382	0.102755	0.752389	0.123558
YER046W	SPO73	1.0805	0.111693	0.752389	0.123558
YHR019C	DED81	0.932629	-0.100625	0.752389	0.123558
YMR316W	DIA1	0.932372	-0.101023	0.752389	0.123558
YML125C	PGA3	0.934273	-0.0980841	0.752389	0.123558
YJL098W	SAP185	0.932487	-0.100845	0.756607	0.12113
YKL132C	RMA1	0.930247	-0.104314	0.75713	0.12083
YBR006W	UGA2	0.933627	-0.0990819	0.75713	0.12083
YPL270W	MDL2	1.07261	0.101122	0.75713	0.12083
YOL103W	ITR2	0.934049	-0.0984305	0.75713	0.12083
YLR466W	YRF1-4	0.932212	-0.10127	0.75713	0.12083
YPL028W	ERG10	0.935618	-0.096008	0.758123	0.12026
YKL035W	UGP1	0.934561	-0.0976398	0.758123	0.12026
YCR073W-A	SOL2	0.931474	-0.102413	0.759237	0.119623
YGL006W	PMC1	0.934281	-0.0980719	0.76693	0.115244
YLR293C	GSP1	0.933052	-0.0999704	0.76693	0.115244
YBL007C	SLA1	0.933591	-0.099138	0.76693	0.115244
YGL240W	DOC1	0.926561	-0.110043	0.76693	0.115244
YFL032W		1.08017	0.111263	0.76693	0.115244
YHR089C	GAR1	0.934447	-0.0978151	0.770656	0.11314
YGL205W	POX1	1.08647	0.119651	0.770656	0.11314
YBR165W	UBS1	1.07274	0.101301	0.770656	0.11314
YPL089C	RLM1	0.932174	-0.101329	0.770656	0.11314
YKR048C	NAP1	0.931766	-0.10196	0.775919	0.110183
YJL076W	NET1	0.933213	-0.0997214	0.777516	0.109291
YOR290C	SNF2	0.933624	-0.0990867	0.777516	0.109291
YMR030W	RSF1	1.07384	0.102785	0.777516	0.109291
YFR024C-A	LSB3	0.935763	-0.095785	0.777516	0.109291
YDR001C	NTH1	0.934899	-0.0971173	0.777516	0.109291
YMR224C	MRE11	1.07287	0.101476	0.777516	0.109291
YEL024W	RIP1	0.934755	-0.0973404	0.777551	0.109271
YOR012W		0.921105	-0.118562	0.777551	0.109271
YML004C	GLO1	0.936154	-0.0951815	0.777551	0.109271
YDR025W	RPS11A	0.934943	-0.0970499	0.777551	0.109271
YPL052W	OAZ1	1.07318	0.101893	0.777551	0.109271
YLR346C		1.08262	0.114521	0.777551	0.109271
YBL067C	UBP13	0.934895	-0.0971237	0.777551	0.109271
YBR115C	LYS2	1.06717	0.0937939	0.777551	0.109271
YFR022W	ROG3	0.932358	-0.101045	0.78513	0.105058
YCR107W	AAD3	1.07326	0.102002	0.78513	0.105058
YLR054C	OSW2	0.924943	-0.112563	0.785772	0.104704
YHL050C		1.07869	0.109283	0.786379	0.104368
YDR234W	LYS4	1.06819	0.0951625	0.787015	0.104017
YJR064W	CCT5	0.936175	-0.0951501	0.787015	0.104017
YOR315W	SFG1	1.07165	0.0998365	0.787015	0.104017
YIL005W	EPS1	1.07253	0.101021	0.787015	0.104017
YER115C	SPR6	0.93201	-0.101582	0.787015	0.104017
YMR160W		1.07138	0.0994714	0.787015	0.104017
YPR149W	NCE102	0.934718	-0.0973975	0.787015	0.104017
YNL268W	LYP1	1.06965	0.0971439	0.787015	0.104017
YBR247C	ENP1	0.934211	-0.0981802	0.787015	0.104017
YNL095C		1.07533	0.104784	0.79328	0.100573
YOL040C	RPS15	0.936014	-0.095398	0.796799	0.098651
YIL059C		0.928207	-0.107482	0.796799	0.098651
YPR163C	TIF3	0.935452	-0.0962649	0.797366	0.0983422
YOR013W	IRC11	0.923897	-0.114197	0.797366	0.0983422
YJR061W		1.07158	0.0997444	0.797366	0.0983422
YMR163C	INP2	1.07467	0.103899	0.797366	0.0983422
YDR534C	FIT1	1.08032	0.111455	0.797642	0.0981921
YAR042W	SWH1	0.935437	-0.096288	0.797642	0.0981921
YNR047W	FPK1	0.931933	-0.101702	0.797642	0.0981921
YBL103C	RTG3	1.06957	0.0970326	0.797642	0.0981921
YDR159W	SAC3	1.07038	0.0981166	0.797642	0.0981921
YPR204W		0.93522	-0.0966217	0.797642	0.0981921
YDR021W	FAL1	0.931333	-0.102631	0.799834	0.0970002
YHR056C	RSC30	1.06873	0.0958974	0.799834	0.0970002
YNL102W	POL1	0.935385	-0.0963682	0.799834	0.0970002
YMR139W	RIM11	1.06937	0.0967572	0.799834	0.0970002
YER028C	MIG3	1.07384	0.102782	0.799877	0.0969771
YBR043C	QDR3	1.06801	0.0949219	0.800623	0.0965721
YDR119W	VBA4	0.936789	-0.0942042	0.802049	0.0957991
YLR116W	MSL5	0.934058	-0.0984155	0.80255	0.0955281
YJL109C	UTP10	0.937115	-0.0937023	0.80255	0.0955281
YDR017C	KCS1	1.06838	0.0954241	0.80255	0.0955281
YBR048W	RPS11B	0.936872	-0.094076	0.80255	0.0955281
YAL036C	RBG1	0.936115	-0.095242	0.80255	0.0955281
YNL052W	COX5A	0.936551	-0.094571	0.80255	0.0955281
YGR079W		0.925457	-0.111763	0.80653	0.0933795
YNL275W	BOR1	1.07048	0.0982637	0.809146	0.0919733
YHR175W-A		1.08204	0.113757	0.809146	0.0919733
YDR370C	DXO1	1.06969	0.097188	0.810917	0.0910236
YGR260W	TNA1	0.938589	-0.0914339	0.810917	0.0910236
YER112W	LSM4	1.0679	0.0947785	0.812223	0.0903245
YOR109W	INP53	0.937616	-0.092931	0.812223	0.0903245
YBR181C	RPS6B	0.935619	-0.0960077	0.812223	0.0903245
YDL211C		1.07754	0.107747	0.812223	0.0903245
YCR048W	ARE1	0.934518	-0.0977058	0.812223	0.0903245
YBL033C	RIB1	1.06797	0.0948644	0.812223	0.0903245
YBR011C	IPP1	0.939566	-0.0899329	0.812223	0.0903245
YKL210W	UBA1	0.939182	-0.0905229	0.812223	0.0903245
YLR448W	RPL6B	0.937602	-0.0929521	0.812223	0.0903245
YLR234W	TOP3	0.927675	-0.108309	0.812223	0.0903245
YNL080C	EOS1	1.06964	0.097132	0.812223	0.0903245
YLR180W	SAM1	0.935667	-0.0959322	0.812223	0.0903245
YDR135C	YCF1	0.937814	-0.0926263	0.813108	0.0898517
YER158C		0.933613	-0.0991039	0.813819	0.0894722
YLR059C	REX2	1.06956	0.097015	0.813864	0.0894483
YDL194W	SNF3	1.06712	0.0937183	0.813864	0.0894483
YBR141C	BMT2	0.930567	-0.103818	0.813864	0.0894483
YGR178C	PBP1	1.06616	0.0924294	0.813864	0.0894483
YHR134W	WSS1	0.934123	-0.0983152	0.813864	0.0894483
YDL126C	CDC48	0.940141	-0.0890502	0.813864	0.0894483
YCL049C		1.06756	0.0943125	0.813864	0.0894483
YMR092C	AIP1	0.938728	-0.0912202	0.813864	0.0894483
YNL222W	SSU72	1.06853	0.0956245	0.813864	0.0894483
YGR256W	GND2	0.931701	-0.102062	0.813864	0.0894483
YHR027C	RPN1	0.938621	-0.0913851	0.813864	0.0894483
YOR324C	FRT1	1.0678	0.0946377	0.813864	0.0894483
YEL042W	GDA1	0.936293	-0.0949683	0.813864	0.0894483
YOR007C	SGT2	0.938909	-0.0909422	0.813864	0.0894483
YKL174C	TPO5	0.936716	-0.0943159	0.813864	0.0894483
YMR073C	IRC21	1.06912	0.0964265	0.813864	0.0894483
YFR013W	IOC3	1.06674	0.0932051	0.813864	0.0894483
YGL022W	STT3	0.938573	-0.0914597	0.813864	0.0894483
YBR084W	MIS1	0.936481	-0.094678	0.813864	0.0894483
YLL062C	MHT1	1.07216	0.100518	0.813864	0.0894483
YPL172C	COX10	1.06916	0.0964736	0.813864	0.0894483
YOR038C	HIR2	1.06783	0.0946769	0.813864	0.0894483
YBR085C-A		0.938195	-0.0920405	0.814027	0.0893614
YFL034C-B	MOB2	0.934734	-0.0973723	0.814027	0.0893614
YNL233W	BNI4	1.06999	0.0975965	0.814027	0.0893614
YNL273W	TOF1	1.07087	0.0987873	0.814027	0.0893614
YDL169C	UGX2	1.07155	0.0996932	0.815866	0.0883812
YOR151C	RPB2	0.939123	-0.0906134	0.815866	0.0883812
YGL030W	RPL30	0.938183	-0.0920587	0.815866	0.0883812
YER167W	BCK2	1.06721	0.0938387	0.815866	0.0883812
YJR149W		1.07018	0.0978504	0.815866	0.0883812
YJL127C	SPT10	0.93597	-0.0954658	0.815866	0.0883812
YDR093W	DNF2	0.937351	-0.0933387	0.815866	0.0883812
YLR192C	HCR1	0.936556	-0.0945628	0.815866	0.0883812
YGL158W	RCK1	1.07372	0.102624	0.815866	0.0883812
YCR061W		0.933725	-0.0989301	0.816541	0.0880221
YJR139C	HOM6	0.939532	-0.0899861	0.816541	0.0880221
YBL024W	NCL1	1.06767	0.0944642	0.816858	0.0878532
YOL001W	PHO80	1.06786	0.0947173	0.820616	0.0858601
YPL160W	CDC60	0.940918	-0.0878593	0.820616	0.0858601
YAR028W		0.937519	-0.0930807	0.824056	0.0840433
YCR084C	TUP1	0.937785	-0.0926704	0.824056	0.0840433
YDR041W	RSM10	1.06631	0.0926313	0.824056	0.0840433
YOR133W	EFT1	0.941704	-0.0866549	0.824056	0.0840433
YPR043W	RPL43A	0.937711	-0.0927855	0.824056	0.0840433
YDL248W	COS7	0.937444	-0.0931962	0.824056	0.0840433
YBR025C	OLA1	0.94084	-0.0879793	0.824056	0.0840433
YPL090C	RPS6A	0.937449	-0.0931875	0.824056	0.0840433
YJL218W		0.931939	-0.101692	0.826628	0.0826901
YBL005W	PDR3	1.06679	0.0932729	0.826628	0.0826901
YDL236W	PHO13	0.940026	-0.0892272	0.826628	0.0826901
YGR146C	ECL1	0.927282	-0.108919	0.826628	0.0826901
YBL076C	ILS1	0.940921	-0.0878551	0.826628	0.0826901
YDR451C	YHP1	1.06771	0.094518	0.826628	0.0826901
YMR186W	HSC82	0.939899	-0.0894226	0.829767	0.0810437
YEL077C		0.937854	-0.0925654	0.829889	0.08098
YJR131W	MNS1	0.937289	-0.0934344	0.829889	0.08098
YMR217W	GUA1	0.94111	-0.0875647	0.831324	0.0802298
YCR003W	MRPL32	1.06647	0.0928389	0.831324	0.0802298
YKL065C	YET1	1.063	0.0881461	0.831324	0.0802298
YKL148C	SDH1	0.937861	-0.0925542	0.831324	0.0802298
YDL031W	DBP10	0.940391	-0.088668	0.831324	0.0802298
YOR330C	MIP1	1.06479	0.0905676	0.831324	0.0802298
YJR090C	GRR1	1.06428	0.0898743	0.83191	0.0799235
YMR093W	UTP15	0.936994	-0.0938879	0.834158	0.0787517
YDL063C	SYO1	0.938849	-0.0910354	0.834287	0.0786844
YMR043W	MCM1	0.937795	-0.0926552	0.834287	0.0786844
YKR070W		0.939589	-0.0898976	0.834287	0.0786844
YGR202C	PCT1	1.06477	0.0905416	0.834287	0.0786844
YER050C	RSM18	1.06512	0.0910141	0.834287	0.0786844
YIR012W	SQT1	0.939297	-0.0903469	0.834287	0.0786844
YER143W	DDI1	1.06433	0.0899432	0.834287	0.0786844
YDR501W	PLM2	1.07407	0.103093	0.834287	0.0786844
YBR285W		1.07413	0.103174	0.834287	0.0786844
YBR090C		1.06873	0.0958939	0.834287	0.0786844
YGL248W	PDE1	0.94008	-0.0891445	0.83924	0.0761136
YIL156W	UBP7	0.937914	-0.0924717	0.841674	0.0748562
YDL037C	BSC1	0.935469	-0.0962385	0.842379	0.0744923
YIL046W	MET30	1.06675	0.0932259	0.842379	0.0744923
YNL112W	DBP2	0.940453	-0.0885724	0.842379	0.0744923
YPL015C	HST2	0.93754	-0.0930474	0.842379	0.0744923
YDR343C	HXT6	0.927518	-0.108554	0.842379	0.0744923
YDR062W	LCB2	0.941815	-0.0864847	0.843897	0.0737105
YEL039C	CYC7	0.938414	-0.0917041	0.843897	0.0737105
YFR021W	ATG18	1.06574	0.091857	0.843897	0.0737105
YBL022C	PIM1	1.06284	0.0879261	0.843897	0.0737105
YOR264W	DSE3	1.06395	0.0894303	0.843897	0.0737105
YDR395W	SXM1	0.940906	-0.0878772	0.847216	0.072006
YHL047C	ARN2	1.06515	0.0910516	0.847216	0.072006
YCR024C	SLM5	1.06846	0.0955331	0.84759	0.0718144
YPL201C	YIG1	1.0764	0.106212	0.84759	0.0718144
YDR281C	PHM6	1.07397	0.102954	0.84759	0.0718144
YBL026W	LSM2	1.06399	0.0894848	0.84759	0.0718144
YKR102W	FLO10	1.06801	0.0949218	0.84797	0.0716195
YJL196C	ELO1	0.941737	-0.0866043	0.854507	0.0682843
YCR102C		0.930279	-0.104265	0.856864	0.0670879
YOR168W	GLN4	0.941608	-0.0868016	0.856864	0.0670879
YDR228C	PCF11	1.06402	0.0895315	0.859532	0.0657379
YIL082W		0.933546	-0.0992076	0.860135	0.0654336
YMR085W		0.935355	-0.0964136	0.861979	0.0645035
YBR286W	APE3	1.06367	0.0890474	0.864518	0.0632261
YDL165W	CDC36	1.06361	0.0889754	0.864518	0.0632261
YLR132C	USB1	1.06428	0.0898768	0.867142	0.0619096
YCR082W	AHC2	1.06284	0.087927	0.867142	0.0619096
YJR117W	STE24	1.06519	0.0911146	0.867142	0.0619096
YPR169W	JIP5	0.941623	-0.086779	0.867142	0.0619096
YBR172C	SMY2	1.06521	0.0911361	0.867899	0.0615307
YNL138W	SRV2	0.941206	-0.087418	0.867899	0.0615307
YEL071W	DLD3	0.941511	-0.0869504	0.867899	0.0615307
YKL006W	RPL14A	0.941477	-0.087003	0.867899	0.0615307
YJR060W	CBF1	1.06331	0.0885644	0.867899	0.0615307
YEL074W		1.07154	0.0996791	0.867899	0.0615307
YML075C	HMG1	1.06124	0.0857461	0.867899	0.0615307
YDL246C	SOR2	0.930843	-0.10339	0.867899	0.0615307
YOR381W	FRE3	0.938397	-0.0917298	0.86934	0.0608103
YNL070W	TOM7	1.06491	0.090725	0.87034	0.0603109
YKL145W	RPT1	0.943845	-0.0833778	0.874786	0.058098
YBR287W		0.943319	-0.0841819	0.874786	0.058098
YPL161C	BEM4	1.06275	0.0877973	0.874786	0.058098
YPL048W	CAM1	0.942056	-0.0861153	0.874786	0.058098
YIL113W	SDP1	0.93812	-0.0921561	0.874786	0.058098
YJL080C	SCP160	0.942317	-0.0857163	0.874786	0.058098
YMR037C	MSN2	1.06214	0.0869748	0.874786	0.058098
YER004W	FMP52	0.942078	-0.0860811	0.874786	0.058098
YHL028W	WSC4	0.937221	-0.0935384	0.874786	0.058098
YGR090W	UTP22	1.06329	0.0885396	0.874786	0.058098
YMR002W	MIX17	1.0609	0.085292	0.874786	0.058098
YDR009W	GAL3	1.06876	0.0959417	0.874786	0.058098
YJL025W	RRN7	1.06792	0.0948039	0.874786	0.058098
YLR388W	RPS29A	1.06298	0.0881086	0.874786	0.058098
YOR116C	RPO31	0.942215	-0.0858726	0.874786	0.058098
YPL272C	PBI1	1.06748	0.0942084	0.874786	0.058098
YGR109C	CLB6	1.07462	0.103828	0.874786	0.058098
YNL006W	LST8	0.941287	-0.0872937	0.874786	0.058098
YNL076W	MKS1	1.06351	0.0888386	0.874786	0.058098
YHR070W	TRM5	0.939558	-0.0899463	0.874786	0.058098
YGL137W	SEC27	0.944098	-0.0829909	0.874786	0.058098
YLL023C	POM33	0.941563	-0.0868709	0.874786	0.058098
YGR200C	ELP2	0.942443	-0.0855224	0.874786	0.058098
YBR067C	TIP1	0.941891	-0.0863674	0.874786	0.058098
YMR046W-A		0.930362	-0.104136	0.874786	0.058098
YKL081W	TEF4	1.06126	0.0857824	0.874786	0.058098
YKR085C	MRPL20	1.0621	0.0869154	0.874786	0.058098
YLR310C	CDC25	1.06116	0.0856366	0.874786	0.058098
YDR212W	TCP1	0.942743	-0.0850642	0.874786	0.058098
YER094C	PUP3	0.943403	-0.0840538	0.874786	0.058098
YDR422C	SIP1	1.06356	0.0889039	0.874786	0.058098
YBR284W		1.06584	0.0919887	0.874786	0.058098
YGR041W	BUD9	1.06262	0.0876309	0.874786	0.058098
YDL182W	LYS20	1.06159	0.0862236	0.874786	0.058098
YDR452W	PPN1	0.94353	-0.0838591	0.876067	0.0574629
YML110C	COQ5	0.943519	-0.0838759	0.876067	0.0574629
YHR044C	DOG1	0.937842	-0.0925825	0.876067	0.0574629
YOR034C-A		1.07285	0.101449	0.876067	0.0574629
YLR129W	DIP2	0.942252	-0.0858146	0.876067	0.0574629
YGR198W	YPP1	1.06175	0.0864486	0.876067	0.0574629
YPR034W	ARP7	1.06154	0.0861646	0.876067	0.0574629
YJL084C	ALY2	0.941533	-0.0869166	0.876067	0.0574629
YIL150C	MCM10	0.93806	-0.0922481	0.876067	0.0574629
YDR406W	PDR15	0.942396	-0.0855948	0.876812	0.0570935
YDR189W	SLY1	1.06213	0.0869658	0.876972	0.0570141
YNL251C	NRD1	1.06225	0.087117	0.878111	0.0564508
YLR460C		0.933578	-0.0991574	0.878111	0.0564508
YCR046C	IMG1	0.941475	-0.0870048	0.878111	0.0564508
YCL048W	SPS22	0.932461	-0.100884	0.878111	0.0564508
YIL075C	RPN2	0.944867	-0.0818171	0.880869	0.0550885
YLR254C	NDL1	1.06228	0.0871706	0.880869	0.0550885
YEL009C	GCN4	0.94455	-0.0823003	0.881193	0.0549287
YBR076C-A		1.06822	0.0952108	0.881726	0.0546665
YOR347C	PYK2	0.942544	-0.0853681	0.881726	0.0546665
YDR504C	SPG3	1.07033	0.0980554	0.881726	0.0546665
YGL129C	RSM23	1.06135	0.0859001	0.881726	0.0546665
YOR213C	SAS5	1.06362	0.0889883	0.881726	0.0546665
YOR369C	RPS12	0.941876	-0.0863915	0.881726	0.0546665
YMR064W	AEP1	1.0614	0.0859623	0.881726	0.0546665
YER011W	TIR1	0.940009	-0.0892539	0.881726	0.0546665
YGR191W	HIP1	0.943682	-0.0836267	0.88459	0.0532579
YPL159C	PET20	1.06118	0.0856639	0.89296	0.0491681
YCR097W	HMRA1	1.06211	0.0869322	0.895231	0.0480649
YGR253C	PUP2	0.944635	-0.0821712	0.895807	0.0477855
YGR201C		0.941344	-0.0872064	0.89677	0.047319
YMR078C	CTF18	1.06439	0.0900266	0.89677	0.047319
YER089C	PTC2	0.942512	-0.0854171	0.897969	0.0467384
YGL146C	RRT6	1.06767	0.094461	0.897969	0.0467384
YDR113C	PDS1	1.06286	0.0879521	0.897969	0.0467384
YGR162W	TIF4631	0.942858	-0.0848881	0.897969	0.0467384
YCR032W	BPH1	0.942974	-0.0847096	0.899083	0.0462002
YHR129C	ARP1	0.940606	-0.0883375	0.899365	0.0460643
YJL177W	RPL17B	0.944902	-0.0817627	0.899365	0.0460643
YLL012W	YEH1	1.06381	0.0892437	0.899365	0.0460643
YER154W	OXA1	0.942994	-0.0846796	0.899365	0.0460643
YOR153W	PDR5	1.05982	0.0838253	0.899365	0.0460643
YOR113W	AZF1	0.94098	-0.0877634	0.899365	0.0460643
YHR085W	IPI1	0.940631	-0.088299	0.899365	0.0460643
YBR080C	SEC18	1.0599	0.0839309	0.900029	0.0457433
YNL147W	LSM7	1.06066	0.0849582	0.900029	0.0457433
YPR031W	NTO1	1.06022	0.0843582	0.902941	0.0443408
YER180C	ISC10	1.06136	0.0859129	0.902941	0.0443408
YDR461C-A		1.06048	0.0847226	0.902941	0.0443408
YPL018W	CTF19	1.06497	0.0908108	0.902941	0.0443408
YDR078C	SHU2	1.06209	0.0869006	0.902941	0.0443408
YOR366W		1.07126	0.0993083	0.902941	0.0443408
YDL029W	ARP2	0.946769	-0.0789163	0.902941	0.0443408
YLR165C	PUS5	1.06148	0.0860751	0.902941	0.0443408
YMR296C	LCB1	0.945225	-0.0812698	0.902941	0.0443408
YGL148W	ARO2	1.0551	0.077378	0.902941	0.0443408
YJL141C	YAK1	0.945573	-0.0807393	0.902941	0.0443408
YKL003C	MRP17	1.05857	0.0821203	0.902941	0.0443408
YJL126W	NIT2	0.944132	-0.0829396	0.902941	0.0443408
YDR498C	SEC20	1.05858	0.0821254	0.902941	0.0443408
YGL249W	ZIP2	0.933747	-0.0988961	0.902941	0.0443408
YER090W	TRP2	1.0603	0.0844726	0.902941	0.0443408
YDR444W		1.05983	0.0838279	0.902941	0.0443408
YGL135W	RPL1B	0.944891	-0.0817798	0.902941	0.0443408
YIR006C	PAN1	0.946132	-0.0798865	0.902941	0.0443408
YEL013W	VAC8	0.946839	-0.0788091	0.902941	0.0443408
YHL049C		1.07062	0.0984416	0.902941	0.0443408
YML029W	USA1	1.05795	0.0812738	0.902941	0.0443408
YHR042W	NCP1	0.942811	-0.0849597	0.902941	0.0443408
YHR038W	RRF1	1.06164	0.086297	0.902941	0.0443408
YCR096C	HMRA2	0.938267	-0.0919297	0.902941	0.0443408
YGR155W	CYS4	0.946225	-0.0797441	0.902941	0.0443408
YLL018C	DPS1	0.946144	-0.0798685	0.902941	0.0443408
YMR214W	SCJ1	0.944581	-0.0822532	0.902941	0.0443408
YKL190W	CNB1	0.945808	-0.080381	0.902941	0.0443408
YEL031W	SPF1	0.945684	-0.0805705	0.902941	0.0443408
YBR184W		0.935482	-0.0962186	0.902941	0.0443408
YAR060C		1.07044	0.0982012	0.902941	0.0443408
YLR036C		1.06249	0.0874547	0.902941	0.0443408
YHR202W		1.06198	0.0867557	0.902941	0.0443408
YNL068C	FKH2	0.945927	-0.0801987	0.902941	0.0443408
YML093W	UTP14	0.944193	-0.0828466	0.902941	0.0443408
YHR009C	TDA3	0.945196	-0.0813151	0.902941	0.0443408
YCL010C	SGF29	0.944186	-0.0828566	0.902941	0.0443408
YMR229C	RRP5	0.945375	-0.081041	0.902941	0.0443408
YJL014W	CCT3	0.946154	-0.0798531	0.902941	0.0443408
YDL229W	SSB1	1.06014	0.0842609	0.902941	0.0443408
YBR196C	PGI1	0.94691	-0.0787006	0.902941	0.0443408
YOL112W	MSB4	0.944768	-0.0819677	0.902941	0.0443408
YLR329W	REC102	1.06902	0.0962906	0.902941	0.0443408
YNL088W	TOP2	0.946216	-0.0797583	0.902941	0.0443408
YDR524C-B		1.05551	0.0779403	0.902941	0.0443408
YOL089C	HAL9	1.05854	0.0820821	0.902941	0.0443408
YOR171C	LCB4	1.05756	0.0807328	0.902941	0.0443408
YJL200C	ACO2	1.05435	0.0763479	0.902941	0.0443408
YGL066W	SGF73	1.05822	0.0816339	0.902941	0.0443408
YNL142W	MEP2	1.0717	0.0999046	0.902941	0.0443408
YDL153C	SAS10	0.944673	-0.0821129	0.902941	0.0443408
YMR309C	NIP1	0.947325	-0.0780688	0.902941	0.0443408
YDL106C	PHO2	1.05764	0.0808544	0.902941	0.0443408
YCR072C	RSA4	0.940825	-0.0880012	0.902941	0.0443408
YPR089W		1.05725	0.0803139	0.902941	0.0443408
YLL018C-A	COX19	0.941669	-0.086708	0.902941	0.0443408
YLR224W		1.05875	0.0823592	0.902941	0.0443408
YFL052W		1.06129	0.0858171	0.902941	0.0443408
YMR241W	YHM2	0.946591	-0.0791863	0.902941	0.0443408
YMR162C	DNF3	1.05745	0.0805855	0.902941	0.0443408
YNL020C	ARK1	1.05893	0.082609	0.902941	0.0443408
YGR009C	SEC9	1.059	0.0827028	0.902941	0.0443408
YPL185W		1.06945	0.0968661	0.902941	0.0443408
YMR299C	DYN3	1.06117	0.0856587	0.902941	0.0443408
YHR022C		0.934061	-0.0984114	0.902941	0.0443408
YLR415C		1.0683	0.0953103	0.902941	0.0443408
YBL046W	PSY4	0.945483	-0.0808761	0.902941	0.0443408
YNL299W	TRF5	1.06341	0.0886914	0.902941	0.0443408
YMR020W	FMS1	0.945291	-0.0811697	0.902941	0.0443408
YJL184W	GON7	1.05766	0.0808783	0.902941	0.0443408
YGL009C	LEU1	1.05739	0.080513	0.902941	0.0443408
YGR205W	TDA10	1.05716	0.0801956	0.902941	0.0443408
YHR117W	TOM71	1.05731	0.0804033	0.902941	0.0443408
YGR045C		1.06856	0.0956735	0.902941	0.0443408
YLR336C	SGD1	0.943374	-0.0840978	0.902941	0.0443408
YOR220W	RCN2	1.05715	0.080177	0.902941	0.0443408
YMR204C	INP1	1.06268	0.0877035	0.902941	0.0443408
YML112W	CTK3	1.06218	0.0870296	0.902941	0.0443408
YOL091W	SPO21	1.06932	0.0966973	0.902941	0.0443408
YNR058W	BIO3	0.940998	-0.087736	0.902941	0.0443408
YNL167C	SKO1	1.05738	0.0804912	0.902941	0.0443408
YGR210C		0.944777	-0.0819543	0.902941	0.0443408
YOR273C	TPO4	0.945319	-0.0811269	0.902941	0.0443408
YHR204W	MNL1	0.943468	-0.0839539	0.902941	0.0443408
YIL051C	MMF1	0.945623	-0.0806624	0.902941	0.0443408
YBR053C		0.945699	-0.0805474	0.902941	0.0443408
YLR357W	RSC2	1.05755	0.0807297	0.902941	0.0443408
YPL196W	OXR1	0.945341	-0.0810939	0.902941	0.0443408
YPL246C	RBD2	0.945607	-0.0806866	0.902941	0.0443408
YGR174C	CBP4	0.94496	-0.0816754	0.902941	0.0443408
YML078W	CPR3	0.946185	-0.0798056	0.902941	0.0443408
YAL060W	BDH1	0.947083	-0.0784376	0.902941	0.0443408
YDR398W	UTP5	1.0581	0.0814719	0.902941	0.0443408
YMR016C	SOK2	0.942048	-0.0861272	0.902941	0.0443408
YFR009W	GCN20	0.946501	-0.0793246	0.902941	0.0443408
YPR033C	HTS1	0.948372	-0.0764743	0.902941	0.0443408
YNL165W		1.06125	0.0857672	0.902941	0.0443408
YJL051W	IRC8	1.06271	0.0877539	0.902941	0.0443408
YPL162C		0.943383	-0.084085	0.902941	0.0443408
YGR166W	TRS65	1.05912	0.0828647	0.902941	0.0443408
YNR013C	PHO91	0.944187	-0.0828552	0.902941	0.0443408
YER043C	SAH1	0.946507	-0.0793156	0.902941	0.0443408
YBR068C	BAP2	0.945227	-0.0812678	0.902941	0.0443408
YGR131W	FHN1	1.06346	0.0887628	0.902941	0.0443408
YLR073C	RFU1	0.937185	-0.0935944	0.902941	0.0443408
YHR106W	TRR2	0.942767	-0.0850275	0.902941	0.0443408
YKL217W	JEN1	1.06349	0.0888088	0.902941	0.0443408
YIL136W	OM45	0.946189	-0.0798001	0.902941	0.0443408
YBR097W	VPS15	0.943429	-0.0840137	0.902941	0.0443408
YDL066W	IDP1	0.944317	-0.0826568	0.902941	0.0443408
YGL012W	ERG4	0.945748	-0.080472	0.902941	0.0443408
YIL139C	REV7	1.06176	0.0864629	0.902941	0.0443408
YDR097C	MSH6	0.944111	-0.0829719	0.902941	0.0443408
YPL091W	GLR1	0.945219	-0.0812791	0.902941	0.0443408
YJR085C		0.946725	-0.0789833	0.902941	0.0443408
YOR335C	ALA1	0.948141	-0.0768262	0.902941	0.0443408
YKL062W	MSN4	0.947212	-0.0782404	0.902941	0.0443408
YOL081W	IRA2	0.945256	-0.0812232	0.902941	0.0443408
YMR318C	ADH6	0.947341	-0.0780437	0.902941	0.0443408
YOR084W	LPX1	0.941636	-0.0867586	0.902941	0.0443408
YDR186C		1.06015	0.0842661	0.902941	0.0443408
YCR052W	RSC6	0.944933	-0.0817156	0.902941	0.0443408
YKL103C	APE1	0.946191	-0.0797962	0.902941	0.0443408
YPL071C		1.06199	0.0867673	0.902941	0.0443408
YDR226W	ADK1	0.947899	-0.0771953	0.905782	0.0429765
YLR099C	ICT1	1.05953	0.0834194	0.905869	0.0429347
YPL283C	YRF1-7	0.945527	-0.0808089	0.906243	0.0427556
YPL012W	RRP12	0.948107	-0.0768781	0.906243	0.0427556
YGR296W	YRF1-3	0.945527	-0.0808089	0.906243	0.0427556
YIL142W	CCT2	0.947792	-0.0773582	0.908937	0.0414661
YHR087W	RTC3	0.947408	-0.0779415	0.908937	0.0414661
YJL088W	ARG3	0.939719	-0.0896989	0.908937	0.0414661
YER127W	LCP5	0.945044	-0.0815461	0.909414	0.0412381
YLR154C-G		0.939966	-0.0893194	0.909536	0.0411803
YBR028C	YPK3	1.0588	0.0824314	0.909536	0.0411803
YDR379W	RGA2	1.05692	0.0798704	0.909536	0.0411803
YJR055W	HIT1	0.941298	-0.0872763	0.909536	0.0411803
YDL215C	GDH2	1.05399	0.0758638	0.909536	0.0411803
YLR417W	VPS36	1.05615	0.0788122	0.909536	0.0411803
YDR030C	RAD28	0.94403	-0.0830954	0.909536	0.0411803
YBR037C	SCO1	1.05667	0.0795245	0.909536	0.0411803
YIL114C	POR2	0.946461	-0.0793852	0.909536	0.0411803
YDL240W	LRG1	1.05637	0.0791152	0.909536	0.0411803
YBR186W	PCH2	0.937622	-0.0929222	0.909536	0.0411803
YHR039C	MSC7	0.948085	-0.0769113	0.909536	0.0411803
YLR312C		1.05814	0.0815255	0.909536	0.0411803
YBL008W	HIR1	1.05696	0.0799261	0.909536	0.0411803
YLR466C-B		1.067	0.0935633	0.909536	0.0411803
YIL078W	THS1	0.948558	-0.076192	0.909536	0.0411803
YGR143W	SKN1	0.946862	-0.0787741	0.909536	0.0411803
YMR206W		1.06254	0.0875221	0.909536	0.0411803
YGR124W	ASN2	1.05476	0.0769163	0.909536	0.0411803
YBR102C	EXO84	0.946105	-0.0799278	0.909536	0.0411803
YPR137W	RRP9	0.945861	-0.0803003	0.909536	0.0411803
YAL008W	FUN14	0.94716	-0.0783206	0.909536	0.0411803
YJL085W	EXO70	1.05565	0.0781255	0.909536	0.0411803
YPL075W	GCR1	1.05636	0.0791006	0.909536	0.0411803
YDR436W	PPZ2	0.94582	-0.0803631	0.909536	0.0411803
YKL187C	FAT3	1.05942	0.0832793	0.909536	0.0411803
YPL149W	ATG5	0.946401	-0.0794766	0.909536	0.0411803
YHR151C	MTC6	1.05745	0.0805829	0.909536	0.0411803
YEL076C		1.06639	0.0927359	0.909536	0.0411803
YPL147W	PXA1	1.05802	0.0813643	0.909536	0.0411803
YMR297W	PRC1	0.949226	-0.0751762	0.909536	0.0411803
YER185W	PUG1	0.940115	-0.0890911	0.909536	0.0411803
YKL027W	TCD2	0.947485	-0.0778255	0.909536	0.0411803
YDR432W	NPL3	0.946846	-0.0787985	0.909536	0.0411803
YGL196W	DSD1	0.94818	-0.0767665	0.909536	0.0411803
YLR089C	ALT1	1.05454	0.0766125	0.909536	0.0411803
YBR245C	ISW1	0.947179	-0.0782903	0.909536	0.0411803
YLR449W	FPR4	0.946984	-0.0785887	0.909536	0.0411803
YCR094W	CDC50	1.057	0.0799817	0.909536	0.0411803
YOR271C	FSF1	0.945538	-0.0807919	0.909536	0.0411803
YBR212W	NGR1	1.05419	0.0761323	0.909536	0.0411803
YDR129C	SAC6	0.948998	-0.0755231	0.909536	0.0411803
YFR006W		0.948438	-0.0763739	0.909536	0.0411803
YPL006W	NCR1	0.947902	-0.0771907	0.909536	0.0411803
YOR212W	STE4	0.948349	-0.0765104	0.909536	0.0411803
YDR085C	AFR1	1.05587	0.0784343	0.909536	0.0411803
YMR266W	RSN1	1.05652	0.0793148	0.909536	0.0411803
YEL054C	RPL12A	0.94713	-0.0783654	0.909536	0.0411803
YFR040W	SAP155	1.05408	0.0759902	0.910012	0.040953
YAL025C	MAK16	0.945971	-0.0801325	0.910012	0.040953
YJR058C	APS2	0.947214	-0.0782372	0.911437	0.0402733
YKL167C	MRP49	1.05679	0.0796853	0.911437	0.0402733
YJL186W	MNN5	0.949028	-0.0754771	0.911486	0.0402501
YKL004W	AUR1	0.947958	-0.0771052	0.911486	0.0402501
YPL084W	BRO1	0.947681	-0.0775268	0.912998	0.0395299
YEL058W	PCM1	0.949605	-0.0746006	0.914703	0.0387198
YFR015C	GSY1	1.05239	0.0736669	0.914703	0.0387198
YHR069C-A		1.06468	0.0904207	0.914703	0.0387198
YIR042C		1.06377	0.0891875	0.914703	0.0387198
YFL002C	SPB4	1.05454	0.0766179	0.914703	0.0387198
YLR019W	PSR2	1.05461	0.0767158	0.914703	0.0387198
YMR281W	GPI12	1.05467	0.0767865	0.914703	0.0387198
YNR019W	ARE2	0.947595	-0.0776583	0.914703	0.0387198
YNL200C		0.947554	-0.0777206	0.914703	0.0387198
YLL029W	FRA1	0.949236	-0.0751612	0.914703	0.0387198
YDL092W	SRP14	1.05448	0.0765339	0.914703	0.0387198
YKL153W		0.942489	-0.0854518	0.914703	0.0387198
YLR014C	PPR1	0.945184	-0.0813333	0.914703	0.0387198
YML100W-A		0.938006	-0.0923316	0.914703	0.0387198
YNL194C		0.937639	-0.0928957	0.914703	0.0387198
YHL029C	OCA5	1.05584	0.0783964	0.914703	0.0387198
YOR190W	SPR1	1.06467	0.0904058	0.914703	0.0387198
YPR103W	PRE2	0.949915	-0.074129	0.914703	0.0387198
YIL107C	PFK26	1.05427	0.0762423	0.914703	0.0387198
YGR251W	NOP19	0.946135	-0.0798819	0.914703	0.0387198
YAL015C	NTG1	0.947436	-0.0778998	0.914786	0.0386805
YDL049C	KNH1	1.05677	0.0796591	0.914909	0.038622
YHR059W	FYV4	1.05784	0.0811231	0.914909	0.038622
YLR023C	IZH3	1.0538	0.0756021	0.914909	0.038622
YOR238W		1.05552	0.0779483	0.915679	0.038257
YER087W	AIM10	0.947963	-0.0770968	0.916743	0.0377526
YDR182W	CDC1	1.05407	0.0759661	0.916743	0.0377526
YLR207W	HRD3	1.05481	0.0769813	0.921591	0.0354617
YJL089W	SIP4	1.06514	0.0910466	0.923062	0.0347691
YDR427W	RPN9	1.05311	0.0746518	0.923062	0.0347691
YDR205W	MSC2	1.05919	0.0829605	0.924551	0.0340693
YDR145W	TAF12	1.05311	0.074662	0.924815	0.033945
YDR259C	YAP6	0.941355	-0.0871886	0.924815	0.033945
YOR187W	TUF1	0.950439	-0.0733339	0.925198	0.0337655
YDL222C	FMP45	0.942692	-0.085142	0.925198	0.0337655
YJL198W	PHO90	1.05378	0.0755678	0.925198	0.0337655
YDR449C	UTP6	0.947273	-0.0781475	0.925198	0.0337655
YER048C	CAJ1	0.949529	-0.0747161	0.925198	0.0337655
YGR108W	CLB1	1.05403	0.075921	0.925198	0.0337655
YPR025C	CCL1	1.05384	0.075654	0.925198	0.0337655
YBL003C	HTA2	0.949147	-0.0752967	0.925198	0.0337655
YMR233W	TRI1	1.05512	0.0774027	0.925198	0.0337655
YML116W-A		1.05563	0.078106	0.927964	0.0324687
YGL220W	FRA2	0.948311	-0.0765678	0.927964	0.0324687
YDR429C	TIF35	0.949793	-0.0743147	0.927964	0.0324687
YBR074W	PFF1	0.950005	-0.0739926	0.927964	0.0324687
YDL195W	SEC31	0.951407	-0.0718659	0.927964	0.0324687
YMR310C		0.947455	-0.0778703	0.927964	0.0324687
YOR205C	GEP3	1.05517	0.0774796	0.927964	0.0324687
YJL138C	TIF2	0.951918	-0.0710909	0.927964	0.0324687
YOR129C	AFI1	1.05709	0.0800991	0.927964	0.0324687
YPL066W	RGL1	1.05347	0.0751499	0.927964	0.0324687
YPL229W		1.05541	0.0778	0.927964	0.0324687
YBR056W		0.950628	-0.0730472	0.927964	0.0324687
YCR028C-A	RIM1	1.05202	0.0731581	0.927964	0.0324687
YGL255W	ZRT1	0.948396	-0.0764378	0.927964	0.0324687
YAL029C	MYO4	0.951554	-0.0716419	0.927964	0.0324687
YNL073W	MSK1	1.05375	0.0755382	0.927964	0.0324687
YER073W	ALD5	1.05298	0.0744747	0.927964	0.0324687
YBR170C	NPL4	1.05355	0.0752618	0.927964	0.0324687
YNR009W	NRM1	1.05711	0.080124	0.927964	0.0324687
YBR221C	PDB1	0.951624	-0.0715358	0.927964	0.0324687
YNL281W	HCH1	0.950352	-0.0734664	0.927964	0.0324687
YNL158W	PGA1	1.05469	0.0768141	0.927964	0.0324687
YNL252C	MRPL17	0.94845	-0.0763563	0.927964	0.0324687
YNL216W	RAP1	1.05261	0.0739748	0.927964	0.0324687
YJL129C	TRK1	0.949025	-0.0754827	0.927964	0.0324687
YNL240C	NAR1	0.947842	-0.0772815	0.927964	0.0324687
YNL066W	SUN4	1.05406	0.0759578	0.927964	0.0324687
YNL173C	MDG1	1.05158	0.0725599	0.927964	0.0324687
YMR076C	PDS5	1.05437	0.0763811	0.927964	0.0324687
YOR054C	VHS3	1.05325	0.0748464	0.927964	0.0324687
YLR373C	VID22	1.05448	0.0765289	0.927964	0.0324687
YJL165C	HAL5	0.950733	-0.0728885	0.927964	0.0324687
YLR300W	EXG1	0.951545	-0.0716555	0.927964	0.0324687
YKR086W	PRP16	1.05342	0.0750853	0.927964	0.0324687
YKL181W	PRS1	0.950871	-0.072678	0.927964	0.0324687
YLR196W	PWP1	0.949766	-0.0743555	0.927964	0.0324687
YJR094W-A	RPL43B	0.949966	-0.0740522	0.927964	0.0324687
YDR127W	ARO1	0.949894	-0.0741611	0.927964	0.0324687
YBR255C-A		1.05593	0.078516	0.927964	0.0324687
YOR098C	NUP1	1.05218	0.0733833	0.927964	0.0324687
YNL308C	KRI1	0.949326	-0.0750246	0.927964	0.0324687
YPL254W	HFI1	1.05302	0.0745359	0.927964	0.0324687
YNL058C		0.948989	-0.0755364	0.927964	0.0324687
YCR020C	PET18	0.942829	-0.0849315	0.927964	0.0324687
YGR084C	MRP13	1.05305	0.0745704	0.927964	0.0324687
YBL002W	HTB2	1.05203	0.0731808	0.927964	0.0324687
YCR086W	CSM1	1.05854	0.0820803	0.927964	0.0324687
YKR072C	SIS2	0.948408	-0.0764209	0.927964	0.0324687
YHR031C	RRM3	1.05383	0.0756426	0.927964	0.0324687
YBL107C	MIX23	1.05373	0.0755038	0.927964	0.0324687
YPR072W	NOT5	1.05325	0.0748428	0.927964	0.0324687
YBR298C	MAL31	1.05285	0.0743063	0.927964	0.0324687
YJL008C	CCT8	0.951755	-0.0713385	0.927964	0.0324687
YHR005C-A	TIM10	1.0528	0.0742266	0.927964	0.0324687
YBR019C	GAL10	1.06443	0.0900765	0.927964	0.0324687
YHL002W	HSE1	1.05341	0.0750694	0.927964	0.0324687
YCR031C	RPS14A	0.951118	-0.0723037	0.927964	0.0324687
YMR304W	UBP15	0.950625	-0.0730515	0.928649	0.0321486
YGL195W	GCN1	0.951833	-0.0712193	0.931572	0.0307838
YLR188W	MDL1	1.05348	0.0751569	0.931572	0.0307838
YER013W	PRP22	1.05335	0.0749785	0.931572	0.0307838
YBR158W	AMN1	1.05123	0.0720821	0.931572	0.0307838
YLR251W	SYM1	0.947986	-0.0770616	0.931572	0.0307838
YER074W	RPS24A	0.949855	-0.0742211	0.931767	0.0306927
YLR273C	PIG1	1.05605	0.0786732	0.931767	0.0306927
YBR206W		1.05683	0.0797477	0.931767	0.0306927
YJL172W	CPS1	0.951118	-0.0723043	0.931767	0.0306927
YML129C	COX14	1.05367	0.0754223	0.931767	0.0306927
YMR075W	RCO1	1.05268	0.07407	0.931767	0.0306927
YEL065W	SIT1	1.05378	0.0755683	0.932359	0.0304171
YCL061C	MRC1	1.0528	0.0742381	0.933864	0.0297165
YJL108C	PRM10	1.06318	0.0883861	0.934008	0.0296494
YGL145W	TIP20	1.05211	0.0732858	0.934724	0.0293168
YFL056C	AAD6	0.949126	-0.0753291	0.935171	0.0291088
YDL021W	GPM2	0.947943	-0.0771276	0.93572	0.0288543
YBL087C	RPL23A	0.951009	-0.0724685	0.93572	0.0288543
YGL233W	SEC15	1.05223	0.0734449	0.935844	0.0287966
YER001W	MNN1	0.951085	-0.0723544	0.93617	0.0286451
YGL223C	COG1	1.05254	0.0738737	0.938088	0.0277566
YNR035C	ARC35	0.952466	-0.070261	0.938088	0.0277566
YGR212W	SLI1	1.05596	0.0785484	0.938088	0.0277566
YPL043W	NOP4	0.949997	-0.074005	0.938088	0.0277566
YGR175C	ERG1	0.951969	-0.071014	0.938088	0.0277566
YBL082C	ALG3	0.949497	-0.0747649	0.938487	0.0275717
YIL116W	HIS5	1.05083	0.0715305	0.938914	0.027374
YCR023C		0.950943	-0.0725699	0.938914	0.027374
YJR047C	ANB1	0.947881	-0.0772219	0.938914	0.027374
YPR160W	GPH1	0.950505	-0.0732342	0.938914	0.027374
YJL147C		1.05463	0.0767391	0.938914	0.027374
YOR197W	MCA1	0.950572	-0.0731317	0.938914	0.027374
YMR158W	MRPS8	1.05262	0.0739886	0.938914	0.027374
YDR042C		1.06271	0.0877514	0.938914	0.027374
YER041W	YEN1	1.05406	0.0759613	0.940906	0.0264537
YOR298W	MUM3	1.06165	0.0863075	0.940906	0.0264537
YPL111W	CAR1	1.05051	0.0710836	0.940906	0.0264537
YCL044C	MGR1	0.94981	-0.0742893	0.940954	0.0264314
YBR217W	ATG12	1.05436	0.0763729	0.940954	0.0264314
YBR085W	AAC3	0.947228	-0.0782158	0.940954	0.0264314
YOR096W	RPS7A	0.952016	-0.0709417	0.94134	0.0262536
YDR441C	APT2	1.05542	0.0778131	0.94134	0.0262536
YDL130W-A	STF1	1.05105	0.0718249	0.94134	0.0262536
YGL139W	FLC3	0.952085	-0.0708385	0.94134	0.0262536
YNL096C	RPS7B	0.952176	-0.0707003	0.94134	0.0262536
YMR069W	NAT4	0.942825	-0.0849385	0.94134	0.0262536
YKL121W	DGR2	1.05171	0.0727418	0.94134	0.0262536
YGL201C	MCM6	0.950304	-0.0735397	0.94134	0.0262536
YDR126W	SWF1	1.0553	0.0776582	0.94134	0.0262536
YDL081C	RPP1A	0.952225	-0.0706248	0.94134	0.0262536
YML043C	RRN11	0.946376	-0.0795142	0.94134	0.0262536
YDR507C	GIN4	1.05144	0.0723614	0.94134	0.0262536
YGR145W	ENP2	0.951013	-0.0724623	0.94134	0.0262536
YJR136C	TTI2	1.05238	0.073661	0.94134	0.0262536
YGR215W	RSM27	1.05246	0.0737633	0.94134	0.0262536
YJR109C	CPA2	0.953394	-0.0688549	0.94134	0.0262536
YDR071C	PAA1	1.05022	0.0706856	0.94134	0.0262536
YKL170W	MRPL38	1.0523	0.0735447	0.94134	0.0262536
YJL074C	SMC3	0.950462	-0.0732991	0.94134	0.0262536
YCL009C	ILV6	0.9501	-0.0738489	0.94134	0.0262536
YER020W	GPA2	1.04982	0.0701392	0.94134	0.0262536
YCL026C-B	HBN1	1.0565	0.0792978	0.94134	0.0262536
YOL106W		1.06124	0.0857466	0.94134	0.0262536
YGR172C	YIP1	0.951003	-0.0724776	0.94134	0.0262536
YCR024C-A	PMP1	0.953655	-0.0684604	0.941355	0.0262465
YPL212C	PUS1	1.05101	0.0717786	0.941355	0.0262465
YOR005C	DNL4	0.950657	-0.0730029	0.941355	0.0262465
YBR267W	REI1	0.949713	-0.074436	0.941355	0.0262465
YKL046C	DCW1	0.953439	-0.0687871	0.941355	0.0262465
YPR081C	GRS2	1.0506	0.0712192	0.941355	0.0262465
YOR165W	SEY1	0.953367	-0.0688965	0.941355	0.0262465
YAL044W-A		1.05242	0.0737087	0.941355	0.0262465
YHR200W	RPN10	1.04962	0.0698621	0.941355	0.0262465
YAL027W	SAW1	1.0524	0.0736842	0.941355	0.0262465
YML065W	ORC1	0.951995	-0.0709735	0.941355	0.0262465
YMR164C	MSS11	1.05118	0.072004	0.941355	0.0262465
YLR355C	ILV5	0.951236	-0.0721247	0.941355	0.0262465
YGR040W	KSS1	1.05138	0.0722875	0.941355	0.0262465
YPR040W	TIP41	0.950455	-0.0733099	0.941355	0.0262465
YJL207C	LAA1	0.952712	-0.0698878	0.941355	0.0262465
YDR346C	SVF1	0.953218	-0.0691227	0.941355	0.0262465
YLR086W	SMC4	1.05017	0.0706164	0.941355	0.0262465
YIL160C	POT1	1.06051	0.0847537	0.941355	0.0262465
YDL168W	SFA1	0.952665	-0.0699593	0.941355	0.0262465
YLR384C	IKI3	0.953279	-0.0690298	0.941355	0.0262465
YOR286W	RDL2	1.0504	0.0709439	0.941355	0.0262465
YKR059W	TIF1	0.954302	-0.0674817	0.941355	0.0262465
YDR359C	EAF1	0.951253	-0.0720984	0.941355	0.0262465
YKR021W	ALY1	1.05058	0.0711869	0.941355	0.0262465
YKL082C	RRP14	0.950463	-0.0732972	0.941355	0.0262465
YDL047W	SIT4	0.952442	-0.0702972	0.941355	0.0262465
YHR179W	OYE2	1.04916	0.069229	0.941355	0.0262465
YPR062W	FCY1	0.952336	-0.070457	0.941355	0.0262465
YLL033W	IRC19	0.946343	-0.0795652	0.941355	0.0262465
YML068W	ITT1	0.951446	-0.071807	0.941355	0.0262465
YOR384W	FRE5	1.05978	0.0837656	0.941355	0.0262465
YER033C	ZRG8	0.950386	-0.0734138	0.941355	0.0262465
YBR105C	VID24	1.05069	0.0713425	0.941355	0.0262465
YBR038W	CHS2	0.951763	-0.0713262	0.941355	0.0262465
YML008C	ERG6	0.952267	-0.0705623	0.941355	0.0262465
YDR046C	BAP3	0.952749	-0.0698314	0.941355	0.0262465
YLR463C		1.06106	0.0855019	0.941355	0.0262465
YFR018C		0.95174	-0.0713606	0.941355	0.0262465
YHR113W	APE4	0.953356	-0.0689129	0.941355	0.0262465
YDR410C	STE14	1.05199	0.0731178	0.941355	0.0262465
YOR346W	REV1	0.951778	-0.0713034	0.941355	0.0262465
YBL091C	MAP2	1.05039	0.0709206	0.941355	0.0262465
YDL004W	ATP16	0.953831	-0.0681942	0.941355	0.0262465
YLR045C	STU2	1.05222	0.0734374	0.941355	0.0262465
YDR466W	PKH3	1.04998	0.0703572	0.941355	0.0262465
YJR014W	TMA22	0.952572	-0.0701005	0.941355	0.0262465
YDR036C	EHD3	1.05084	0.071545	0.941355	0.0262465
YOR173W	DCS2	0.951669	-0.0714678	0.941355	0.0262465
YEL036C	ANP1	1.05061	0.0712263	0.941355	0.0262465
YDL160C	DHH1	0.952473	-0.07025	0.941355	0.0262465
YNR041C	COQ2	0.951063	-0.0723873	0.941355	0.0262465
YBR227C	MCX1	0.951809	-0.0712553	0.941355	0.0262465
YDR191W	HST4	1.05453	0.0766014	0.941355	0.0262465
YDR224C	HTB1	1.0491	0.0691456	0.941778	0.0260514
YNL081C	SWS2	1.04949	0.0696846	0.945195	0.0244784
YPL142C		0.944296	-0.0826885	0.94598	0.0241181
YBL027W	RPL19B	0.95344	-0.0687863	0.94598	0.0241181
YLL042C	ATG10	0.943786	-0.083468	0.947739	0.0233114
YGL113W	SLD3	1.05077	0.0714439	0.947739	0.0233114
YDL188C	PPH22	0.953733	-0.0683425	0.947913	0.0232313
YCR092C	MSH3	0.951822	-0.0712369	0.947913	0.0232313
YLR304C	ACO1	1.05019	0.0706478	0.947913	0.0232313
YPL137C	GIP3	1.04958	0.069815	0.947913	0.0232313
YBR007C	DSF2	1.05095	0.0716885	0.948683	0.022879
YHR062C	RPP1	0.951593	-0.0715837	0.949328	0.0225838
YKL080W	VMA5	0.954719	-0.0668514	0.949328	0.0225838
YML126C	ERG13	1.04916	0.0692292	0.949328	0.0225838
YPR181C	SEC23	0.953809	-0.0682276	0.949328	0.0225838
YJL013C	MAD3	1.05013	0.0705632	0.949864	0.0223386
YLR294C		1.05157	0.0725474	0.949988	0.0222818
YEL043W		1.04863	0.068505	0.950614	0.0219958
YFR033C	QCR6	0.954115	-0.0677642	0.951044	0.0217993
YCL045C	EMC1	1.05047	0.0710398	0.951044	0.0217993
YAL019W	FUN30	0.952897	-0.0696076	0.954549	0.0202016
YMR171C	EAR1	0.952824	-0.0697184	0.954814	0.0200813
YOR259C	RPT4	0.954842	-0.0666666	0.954814	0.0200813
YJL060W	BNA3	1.04969	0.0699572	0.954814	0.0200813
YDL028C	MPS1	1.04995	0.0703248	0.954814	0.0200813
YGL013C	PDR1	1.04967	0.0699372	0.955644	0.0197036
YBR156C	SLI15	1.05414	0.0760646	0.956936	0.0191173
YBL004W	UTP20	0.953993	-0.0679491	0.956936	0.0191173
YIL017C	VID28	1.04805	0.0677125	0.956936	0.0191173
YPR113W	PIS1	0.954911	-0.066562	0.956936	0.0191173
YKR068C	BET3	1.04882	0.0687708	0.956936	0.0191173
YDR535C		1.05802	0.0813729	0.958222	0.0185338
YDL013W	SLX5	1.04944	0.0696239	0.958222	0.0185338
YHR069C	RRP4	0.953522	-0.068662	0.958222	0.0185338
YBL048W	RRT1	0.945152	-0.081382	0.958222	0.0185338
YDR303C	RSC3	1.04888	0.0688543	0.958222	0.0185338
YHR032W	ERC1	0.953915	-0.0680681	0.958222	0.0185338
YOL136C	PFK27	1.04843	0.0682263	0.958222	0.0185338
YMR301C	ATM1	0.952387	-0.0703802	0.958222	0.0185338
YKR069W	MET1	0.952138	-0.0707579	0.958222	0.0185338
YCR077C	PAT1	0.953882	-0.0681169	0.958222	0.0185338
YIL006W	YIA6	1.05373	0.0755041	0.958222	0.0185338
YDR324C	UTP4	0.953622	-0.0685099	0.958222	0.0185338
YOR124C	UBP2	0.954021	-0.0679063	0.958222	0.0185338
YJL216C	IMA5	1.05273	0.0741356	0.958222	0.0185338
YOL152W	FRE7	1.05802	0.0813647	0.958222	0.0185338
YML086C	ALO1	0.954375	-0.0673713	0.96098	0.0172855
YML053C		1.0495	0.0697067	0.961079	0.0172409
YEL064C	AVT2	1.05076	0.0714315	0.961584	0.0170129
YMR008C	PLB1	0.953013	-0.0694327	0.961584	0.0170129
YPL051W	ARL3	1.04993	0.0702987	0.961584	0.0170129
YCR036W	RBK1	0.954539	-0.0671241	0.961584	0.0170129
YMR122W-A		0.956033	-0.0648684	0.961826	0.0169035
YCL058W-A	ADF1	0.94763	-0.0776043	0.961826	0.0169035
YHR139C	SPS100	0.945556	-0.0807653	0.961826	0.0169035
YPL085W	SEC16	0.95413	-0.067742	0.961826	0.0169035
YLL034C	RIX7	0.953859	-0.0681519	0.961826	0.0169035
YIL068C	SEC6	0.954121	-0.0677561	0.961826	0.0169035
YGL231C	EMC4	1.04821	0.0679239	0.962202	0.0167336
YAL063C-A		1.05805	0.0814036	0.962202	0.0167336
YEL034W	HYP2	0.955185	-0.066148	0.96284	0.0164458
YPL151C	PRP46	0.952635	-0.0700049	0.963901	0.0159675
YLR104W	LCL2	1.05027	0.0707598	0.963948	0.0159462
YDL200C	MGT1	1.05011	0.0705387	0.966459	0.0148164
YBR078W	ECM33	0.954707	-0.0668701	0.966459	0.0148164
YPL195W	APL5	0.954811	-0.066713	0.966459	0.0148164
YCL027W	FUS1	1.05096	0.0717044	0.966459	0.0148164
YDR156W	RPA14	0.951844	-0.0712031	0.966459	0.0148164
YDR465C	RMT2	0.9546	-0.067032	0.966459	0.0148164
YFR042W	KEG1	1.05044	0.0709979	0.966459	0.0148164
YGL237C	HAP2	1.04882	0.0687688	0.966459	0.0148164
YJR160C	MPH3	1.05724	0.080308	0.966459	0.0148164
YHR215W	PHO12	1.0506	0.0712125	0.966459	0.0148164
YHR189W	PTH1	0.951174	-0.0722188	0.966459	0.0148164
YLR377C	FBP1	1.05738	0.0804892	0.966459	0.0148164
YFL044C	OTU1	0.954092	-0.0677997	0.966459	0.0148164
YOL076W	MDM20	0.954088	-0.0678056	0.966459	0.0148164
YOR298C-A	MBF1	0.955018	-0.0663999	0.966459	0.0148164
YKL034W	TUL1	1.04901	0.0690333	0.966459	0.0148164
YLR200W	YKE2	1.04831	0.0680638	0.966459	0.0148164
YNL248C	RPA49	0.955061	-0.0663351	0.966459	0.0148164
YLR352W		1.04836	0.0681358	0.966975	0.0145847
YCR105W	ADH7	0.945706	-0.0805362	0.966975	0.0145847
YJR155W	AAD10	0.951494	-0.0717331	0.966975	0.0145847
YJL166W	QCR8	0.95498	-0.0664575	0.966975	0.0145847
YER049W	TPA1	0.954838	-0.0666719	0.966975	0.0145847
YGR076C	MRPL25	1.04919	0.0692797	0.966975	0.0145847
YMR218C	TRS130	0.954681	-0.0669099	0.966975	0.0145847
YMR235C	RNA1	0.956323	-0.0644298	0.966975	0.0145847
YBR008C	FLR1	0.952735	-0.0698537	0.966975	0.0145847
YKL122C	SRP21	1.04738	0.0667828	0.966975	0.0145847
YDR059C	UBC5	1.04919	0.0692748	0.966975	0.0145847
YBL042C	FUI1	1.04917	0.0692495	0.966975	0.0145847
YMR300C	ADE4	0.955169	-0.0661714	0.966975	0.0145847
YPL183C	RTT10	0.954907	-0.0665685	0.966975	0.0145847
YKL002W	DID4	0.955374	-0.0658622	0.966975	0.0145847
YKL136W		1.05515	0.0774492	0.96786	0.0141877
YJL214W	HXT8	0.945867	-0.080291	0.96786	0.0141877
YLL039C	UBI4	0.956183	-0.0646412	0.96786	0.0141877
YLR154W-A		0.949169	-0.0752627	0.96786	0.0141877
YAL033W	POP5	1.04831	0.0680717	0.96786	0.0141877
YDL167C	NRP1	0.955002	-0.0664237	0.96786	0.0141877
YDR519W	FPR2	0.955422	-0.0657905	0.96786	0.0141877
YBL056W	PTC3	0.956275	-0.0645022	0.96786	0.0141877
YCR106W	RDS1	1.04946	0.0696405	0.96786	0.0141877
YOR294W	RRS1	0.955128	-0.0662343	0.96786	0.0141877
YDR161W		0.955329	-0.0659303	0.96786	0.0141877
YPL177C	CUP9	0.954444	-0.0672679	0.96786	0.0141877
YOR056C	NOB1	0.955132	-0.0662277	0.96786	0.0141877
YGR123C	PPT1	0.955491	-0.0656854	0.96786	0.0141877
YBR001C	NTH2	1.04739	0.0668025	0.96786	0.0141877
YDL148C	NOP14	0.955086	-0.0662969	0.96786	0.0141877
YLR245C	CDD1	0.950451	-0.0733153	0.96786	0.0141877
YNR031C	SSK2	0.954963	-0.0664832	0.96786	0.0141877
YML010W	SPT5	0.955434	-0.0657715	0.96786	0.0141877
YGR023W	MTL1	0.954121	-0.0677559	0.96786	0.0141877
YOR035C	SHE4	1.04686	0.0660749	0.96786	0.0141877
YLR436C	ECM30	1.04635	0.06537	0.96786	0.0141877
YGL076C	RPL7A	0.956605	-0.0640048	0.96786	0.0141877
YCL001W	RER1	1.04651	0.0655852	0.96786	0.0141877
YPR017C	DSS4	1.04945	0.069634	0.96786	0.0141877
YDL241W		0.952029	-0.0709223	0.96786	0.0141877
YJL201W	ECM25	1.05041	0.0709547	0.96786	0.0141877
YPR200C	ARR2	1.05702	0.0800066	0.96786	0.0141877
YGR082W	TOM20	1.04823	0.067949	0.96786	0.0141877
YNL288W	CAF40	1.04815	0.0678439	0.96786	0.0141877
YMR191W	SPG5	1.04717	0.0664899	0.96786	0.0141877
YHR149C	SKG6	1.04805	0.0677135	0.968145	0.0140596
YKL180W	RPL17A	0.955213	-0.0661057	0.968145	0.0140596
YKL108W	SLD2	1.04859	0.0684523	0.969407	0.0134939
YOL077W-A	ATP19	0.954545	-0.0671153	0.969572	0.0134197
YAL021C	CCR4	0.95468	-0.0669112	0.969572	0.0134197
YLR408C	BLS1	1.05139	0.0722958	0.969572	0.0134197
YBR302C	COS2	0.955826	-0.0651798	0.969572	0.0134197
YJL142C	IRC9	0.951987	-0.0709867	0.969572	0.0134197
YJL158C	CIS3	0.956207	-0.0646051	0.969572	0.0134197
YNL025C	SSN8	0.954167	-0.0676865	0.969572	0.0134197
YOR108W	LEU9	1.04609	0.0650038	0.969572	0.0134197
YML132W	COS3	0.955826	-0.0651798	0.969572	0.0134197
YER177W	BMH1	0.957623	-0.0624702	0.969677	0.0133729
YLL045C	RPL8B	0.95681	-0.0636952	0.972228	0.0122319
YGL027C	CWH41	0.956593	-0.064023	0.972228	0.0122319
YDR353W	TRR1	0.956801	-0.0637086	0.972373	0.012167
YPR007C	REC8	0.946699	-0.0790217	0.972373	0.012167
YAR029W		0.946973	-0.0786047	0.972553	0.0120867
YCR005C	CIT2	1.04848	0.0683013	0.972874	0.0119434
YOL010W	RCL1	0.954674	-0.0669196	0.974267	0.0113218
YLR173W		1.04678	0.0659647	0.974267	0.0113218
YOL120C	RPL18A	0.956601	-0.0640104	0.974383	0.0112705
YBR185C	MBA1	1.04703	0.0663052	0.977681	0.00980261
YGL203C	KEX1	1.0462	0.0651535	0.977681	0.00980261
YJL056C	ZAP1	1.04737	0.0667779	0.977681	0.00980261
YPL101W	ELP4	1.04721	0.0665449	0.977681	0.00980261
YOL075C		0.955309	-0.0659614	0.977681	0.00980261
YLR287C		0.955371	-0.0658668	0.977681	0.00980261
YDR164C	SEC1	0.955469	-0.0657187	0.977681	0.00980261
YJR011C		1.0486	0.0684644	0.977681	0.00980261
YLR363C	NMD4	1.04738	0.0667907	0.977681	0.00980261
YIL018W	RPL2B	0.958199	-0.0616025	0.977681	0.00980261
YDR375C	BCS1	1.04658	0.0656853	0.977681	0.00980261
YNL293W	MSB3	0.955891	-0.0650814	0.977681	0.00980261
YNL133C	FYV6	1.0481	0.06778	0.977681	0.00980261
YMR142C	RPL13B	0.957197	-0.0631128	0.977681	0.00980261
YER190W	YRF1-2	0.947274	-0.0781465	0.977681	0.00980261
YNR062C		0.948293	-0.0765948	0.977681	0.00980261
YBR241C		0.955069	-0.0663231	0.977681	0.00980261
YBR234C	ARC40	0.957377	-0.0628404	0.978147	0.00959581
YGR126W		0.950622	-0.0730563	0.978171	0.0095852
YBR211C	AME1	1.0458	0.0646017	0.979241	0.0091103
YPR152C	URN1	0.953224	-0.0691132	0.979241	0.0091103
YML062C	MFT1	0.955612	-0.0655032	0.979241	0.0091103
YPR107C	YTH1	1.04661	0.065728	0.979241	0.0091103
YAL043C	PTA1	0.955493	-0.065683	0.979241	0.0091103
YER099C	PRS2	0.956815	-0.0636883	0.979241	0.0091103
YJL049W		1.04663	0.0657462	0.979241	0.0091103
YFR052C-A		1.04536	0.0640053	0.979241	0.0091103
YDR479C	PEX29	0.956721	-0.0638302	0.979241	0.0091103
YIR017C	MET28	0.954747	-0.0668096	0.979241	0.0091103
YOR015W		1.04704	0.0663104	0.979241	0.0091103
YIL091C	UTP25	0.955892	-0.0650806	0.979241	0.0091103
YPL099C	INA17	1.04678	0.065963	0.979241	0.0091103
YGL092W	NUP145	0.957139	-0.0632004	0.979241	0.0091103
YOR042W	CUE5	0.955546	-0.0656027	0.979241	0.0091103
YGR047C	TFC4	0.956716	-0.0638377	0.979241	0.0091103
YFL016C	MDJ1	0.956309	-0.0644516	0.979241	0.0091103
YGL212W	VAM7	0.953915	-0.0680673	0.979241	0.0091103
YGR231C	PHB2	0.957697	-0.0623584	0.979241	0.0091103
YDL055C	PSA1	0.958697	-0.0608535	0.979241	0.0091103
YNR014W		0.956682	-0.0638885	0.979241	0.0091103
YFR031C-A	RPL2A	0.957641	-0.0624428	0.979241	0.0091103
YER133W	GLC7	0.957965	-0.0619552	0.979241	0.0091103
YLR432W	IMD3	1.04436	0.062625	0.979241	0.0091103
YHR075C	PPE1	1.04763	0.0671263	0.979241	0.0091103
YHR021C	RPS27B	1.04499	0.063487	0.979241	0.0091103
YBR135W	CKS1	1.04716	0.0664823	0.979241	0.0091103
YGL184C	STR3	0.956338	-0.0644067	0.979241	0.0091103
YDR291W	HRQ1	0.956362	-0.0643715	0.979241	0.0091103
YER176W	ECM32	1.04455	0.0628812	0.979241	0.0091103
YHL006C	SHU1	1.05069	0.0713348	0.979241	0.0091103
YIL133C	RPL16A	0.957705	-0.0623469	0.979241	0.0091103
YPR067W	ISA2	1.0473	0.0666746	0.979241	0.0091103
YER137C		0.94933	-0.0750185	0.979241	0.0091103
YPR141C	KAR3	1.04663	0.0657486	0.979241	0.0091103
YJR105W	ADO1	0.958374	-0.0613388	0.979241	0.0091103
YOL119C	MCH4	1.04596	0.0648285	0.979241	0.0091103
YMR194C-B	CMC4	1.05161	0.0725942	0.980689	0.0084689
YKL063C		1.0454	0.0640611	0.980689	0.0084689
YPR166C	MRP2	1.04667	0.065806	0.981677	0.00803155
YMR102C		0.949805	-0.074297	0.982127	0.00783227
YLR363W-A		1.04785	0.0674288	0.982127	0.00783227
YPL110C	GDE1	1.0451	0.0636421	0.982202	0.00779938
YLR316C	TAD3	0.95496	-0.0664872	0.982202	0.00779938
YNL063W	MTQ1	0.954668	-0.0669289	0.982202	0.00779938
YLR047C	FRE8	0.954944	-0.0665121	0.982634	0.00760808
YOL062C	APM4	0.957488	-0.0626732	0.983738	0.00712038
YOR337W	TEA1	0.955639	-0.0654617	0.983738	0.00712038
YIL122W	POG1	0.955299	-0.0659763	0.983738	0.00712038
YHR103W	SBE22	1.04514	0.0637005	0.983738	0.00712038
YKL218C	SRY1	1.04516	0.0637191	0.983738	0.00712038
YNL307C	MCK1	0.957803	-0.0621989	0.983738	0.00712038
YCR088W	ABP1	0.956686	-0.0638829	0.983738	0.00712038
YPL231W	FAS2	0.957632	-0.0624574	0.983738	0.00712038
YJL149W	DAS1	1.04702	0.0662864	0.983738	0.00712038
YLR343W	GAS2	1.05064	0.0712676	0.983738	0.00712038
YDL086W		0.95707	-0.0633034	0.983738	0.00712038
YPR015C		0.948978	-0.0755539	0.983832	0.00707899
YPR060C	ARO7	1.04437	0.0626343	0.984602	0.00673939
YMR273C	ZDS1	0.955513	-0.0656531	0.984602	0.00673939
YLR451W	LEU3	1.04467	0.0630457	0.984602	0.00673939
YLR422W		1.04551	0.064202	0.984602	0.00673939
YDL042C	SIR2	1.04666	0.0657927	0.984602	0.00673939
YKL059C	MPE1	1.04562	0.0643608	0.984602	0.00673939
YPR086W	SUA7	0.957568	-0.0625534	0.984602	0.00673939
YBR275C	RIF1	1.04445	0.0627367	0.984602	0.00673939
YBR233W	PBP2	1.04594	0.0648006	0.984602	0.00673939
YOR246C	ENV9	0.958007	-0.0618917	0.984602	0.00673939
YOR318C		1.05309	0.0746253	0.984602	0.00673939
YGL072C		0.948907	-0.0756618	0.984602	0.00673939
YMR058W	FET3	0.957151	-0.0631817	0.984602	0.00673939
YGR245C	SDA1	0.957484	-0.0626802	0.984602	0.00673939
YPL116W	HOS3	1.04552	0.0642272	0.984602	0.00673939
YHR119W	SET1	1.04609	0.0650061	0.984602	0.00673939
YLR301W	HRI1	0.957958	-0.0619651	0.984602	0.00673939
YHL042W		0.948656	-0.0760432	0.984602	0.00673939
YGR130C		1.04346	0.0613745	0.984602	0.00673939
YFR027W	ECO1	1.04933	0.069471	0.984602	0.00673939
YLR130C	ZRT2	0.95837	-0.0613458	0.985429	0.00637446
YOR143C	THI80	1.04596	0.064826	0.985429	0.00637446
YDR147W	EKI1	1.04458	0.0629198	0.985429	0.00637446
YOL110W	SHR5	0.956126	-0.0647281	0.985429	0.00637446
YPR111W	DBF20	1.04585	0.0646692	0.985429	0.00637446
YML011C	RAD33	1.04679	0.0659729	0.985429	0.00637446
YMR052W	FAR3	1.04953	0.0697377	0.985429	0.00637446
YJR145C	RPS4A	0.958714	-0.0608281	0.987168	0.00560909
YDR511W	SDH7	1.04592	0.0647732	0.988979	0.00481271
YAR031W	PRM9	0.953124	-0.0692641	0.988979	0.00481271
YNL138W-A	YSF3	1.04676	0.0659359	0.988979	0.00481271
YGL116W	CDC20	1.04574	0.0645211	0.988979	0.00481271
YOL061W	PRS5	0.958719	-0.0608208	0.988979	0.00481271
YPL119C-A		1.05293	0.0744027	0.988979	0.00481271
YPL041C		1.04905	0.069087	0.988979	0.00481271
YKR057W	RPS21A	0.957702	-0.0623519	0.988979	0.00481271
YLR020C	YEH2	0.957996	-0.0619091	0.988979	0.00481271
YFL034W		0.957694	-0.0623633	0.988979	0.00481271
YER038C	KRE29	1.04749	0.0669326	0.988979	0.00481271
YOR230W	WTM1	1.04382	0.0618679	0.988979	0.00481271
YDL235C	YPD1	1.04399	0.0621121	0.989619	0.00453198
YIL015W	BAR1	1.05084	0.0715468	0.989619	0.00453198
YJR083C	ACF4	1.04473	0.063128	0.989619	0.00453198
YIL095W	PRK1	1.04392	0.0620129	0.989619	0.00453198
YMR131C	RRB1	0.95922	-0.0600665	0.989619	0.00453198
YBL020W	RFT1	0.958415	-0.0612781	0.989619	0.00453198
YIR036C	IRC24	0.957928	-0.0620112	0.989619	0.00453198
YMR234W	RNH1	0.957551	-0.0625791	0.989619	0.00453198
YJR104C	SOD1	0.959766	-0.0592454	0.989619	0.00453198
YPL095C	EEB1	0.956289	-0.0644811	0.989619	0.00453198
YGR280C	PXR1	1.04391	0.0619922	0.989619	0.00453198
YDL117W	CYK3	1.0439	0.0619852	0.989619	0.00453198
YKL146W	AVT3	1.04264	0.0602361	0.989619	0.00453198
YER117W	RPL23B	0.958684	-0.0608729	0.989619	0.00453198
YBL079W	NUP170	1.04291	0.0606153	0.989619	0.00453198
YDL205C	HEM3	0.959016	-0.0603735	0.989619	0.00453198
YMR165C	PAH1	0.957516	-0.062631	0.989619	0.00453198
YFL036W	RPO41	0.959241	-0.0600343	0.989619	0.00453198
YBL072C	RPS8A	0.959539	-0.0595863	0.989619	0.00453198
YDL207W	GLE1	1.04337	0.061246	0.989619	0.00453198
YOR340C	RPA43	1.04362	0.0616025	0.989619	0.00453198
YML096W		0.957805	-0.0621963	0.989619	0.00453198
YMR239C	RNT1	0.957392	-0.0628185	0.989619	0.00453198
YLR353W	BUD8	1.04522	0.0638004	0.989619	0.00453198
YPL047W	SGF11	1.0457	0.0644698	0.989619	0.00453198
YDR320C	SWA2	0.957511	-0.0626397	0.989619	0.00453198
YCR009C	RVS161	0.959931	-0.0589974	0.989619	0.00453198
YIL048W	NEO1	0.958777	-0.0607324	0.989619	0.00453198
YDR447C	RPS17B	0.957664	-0.0624078	0.989619	0.00453198
YCR014C	POL4	0.956973	-0.0634497	0.989619	0.00453198
YKL047W	ANR2	1.04332	0.0611831	0.989619	0.00453198
YOL114C		1.04861	0.0684822	0.989619	0.00453198
YNL201C	PSY2	1.04274	0.0603785	0.989619	0.00453198
YIR031C	DAL7	1.04481	0.0632369	0.989619	0.00453198
YNL188W	KAR1	1.04451	0.0628212	0.989619	0.00453198
YDR497C	ITR1	0.960359	-0.0583542	0.989619	0.00453198
YBL038W	MRPL16	1.04409	0.0622526	0.989619	0.00453198
YFL059W	SNZ3	0.954578	-0.0670651	0.989619	0.00453198
YBL059C-A	CMC2	1.04519	0.0637597	0.989619	0.00453198
YKL038W	RGT1	0.957422	-0.0627724	0.989619	0.00453198
YNL192W	CHS1	0.959142	-0.0601838	0.989619	0.00453198
YMR203W	TOM40	0.959193	-0.0601074	0.989619	0.00453198
YGL225W	VRG4	0.959582	-0.0595217	0.989619	0.00453198
YGL188C		0.954748	-0.0668074	0.989619	0.00453198
YER170W	ADK2	1.0461	0.0650173	0.989619	0.00453198
YHR100C	GEP4	1.04597	0.0648355	0.989619	0.00453198
YER071C	TDA2	1.04509	0.0636301	0.989619	0.00453198
YNL199C	GCR2	1.04327	0.0611143	0.989619	0.00453198
YBR044C	TCM62	1.04411	0.0622719	0.989619	0.00453198
YPL004C	LSP1	0.960606	-0.0579829	0.989619	0.00453198
YJR049C	UTR1	0.958962	-0.060454	0.989619	0.00453198
YBR039W	ATP3	0.959548	-0.0595725	0.989619	0.00453198
YLR228C	ECM22	1.04343	0.0613299	0.989619	0.00453198
YBR150C	TBS1	1.04411	0.0622737	0.989619	0.00453198
YNR036C	MRPS12	0.958579	-0.061031	0.989619	0.00453198
YDR214W	AHA1	0.95825	-0.0615261	0.989619	0.00453198
YBR218C	PYC2	0.958656	-0.0609142	0.989619	0.00453198
YML013W	UBX2	0.957463	-0.0627114	0.989619	0.00453198
YML085C	TUB1	0.959382	-0.0598224	0.989619	0.00453198
YKL143W	LTV1	0.9583	-0.0614512	0.989619	0.00453198
YEL067C		1.05148	0.0724277	0.989619	0.00453198
YIR015W	RPR2	0.954032	-0.0678903	0.989619	0.00453198
YGR017W		1.04233	0.0598132	0.989854	0.00442878
YJR087W		1.05071	0.071359	0.989854	0.00442878
YMR006C	PLB2	1.04446	0.0627587	0.989854	0.00442878
YNL256W	FOL1	0.959616	-0.0594714	0.989854	0.00442878
YLL019C	KNS1	0.958169	-0.0616485	0.991682	0.00362745
YJL130C	URA2	1.04141	0.0585374	0.991895	0.00353446
YHR057C	CPR2	0.959032	-0.0603489	0.991895	0.00353446
YKL066W		1.04618	0.0651264	0.992387	0.00331872
YGL179C	TOS3	0.958787	-0.0607174	0.992387	0.00331872
YMR056C	AAC1	0.95715	-0.0631834	0.992387	0.00331872
YGR234W	YHB1	0.960546	-0.0580731	0.992387	0.00331872
YLR306W	UBC12	0.957648	-0.0624324	0.992387	0.00331872
YDR467C		1.05098	0.071736	0.992387	0.00331872
YIR027C	DAL1	1.05147	0.0724016	0.992387	0.00331872
YOR103C	OST2	1.0431	0.0608713	0.992387	0.00331872
YBR049C	REB1	1.0428	0.0604632	0.992387	0.00331872
YIL049W	DFG10	1.04545	0.0641188	0.992387	0.00331872
YNL271C	BNI1	0.959253	-0.060017	0.992387	0.00331872
YML009C	MRPL39	1.04338	0.0612646	0.992387	0.00331872
YMR176W	ECM5	1.04288	0.0605773	0.992387	0.00331872
YDR285W	ZIP1	1.04427	0.0624958	0.992387	0.00331872
YEL038W	UTR4	0.959579	-0.0595269	0.992387	0.00331872
YKL168C	KKQ8	0.958409	-0.0612864	0.992387	0.00331872
YGL038C	OCH1	1.04203	0.0593922	0.992387	0.00331872
YDL005C	MED2	1.04196	0.0593035	0.992387	0.00331872
YOR368W	RAD17	1.04485	0.063298	0.992387	0.00331872
YER031C	YPT31	0.960305	-0.0584349	0.992387	0.00331872
YIL155C	GUT2	1.04275	0.0603908	0.992387	0.00331872
YJL137C	GLG2	1.04581	0.0646184	0.992387	0.00331872
YHR150W	PEX28	1.04367	0.0616695	0.992387	0.00331872
YMR272C	SCS7	0.959874	-0.0590837	0.992387	0.00331872
YNL294C	RIM21	0.95951	-0.0596308	0.992387	0.00331872
YKL024C	URA6	0.95973	-0.0593003	0.992387	0.00331872
YIL153W	RRD1	0.958414	-0.0612795	0.992387	0.00331872
YOR303W	CPA1	1.04299	0.0607296	0.992387	0.00331872
YLL036C	PRP19	1.04295	0.0606643	0.992387	0.00331872
YDL123W	SNA4	0.958474	-0.0611885	0.992387	0.00331872
YJL187C	SWE1	1.04405	0.0621936	0.992387	0.00331872
YLL016W	SDC25	1.04388	0.0619547	0.992387	0.00331872
YGR021W		0.959	-0.0603969	0.993482	0.00284001
YPL072W	UBP16	1.04375	0.0617741	0.993693	0.0027479
YGR283C		0.95844	-0.0612404	0.993693	0.0027479
YCR018C-A		1.04464	0.0630043	0.993693	0.0027479
YJL062W	LAS21	1.04269	0.0603049	0.993693	0.0027479
YLL048C	YBT1	0.96151	-0.0566256	0.993693	0.0027479
YDR461W	MFA1	1.04265	0.060251	0.993693	0.0027479
YPR097W		0.961162	-0.0571487	0.993693	0.0027479
YCL058C	FYV5	1.04974	0.0700351	0.993693	0.0027479
YGR239C	PEX21	1.04339	0.0612827	0.993693	0.0027479
YMR188C	MRPS17	1.04133	0.0584323	0.993693	0.0027479
YJL045W		1.05039	0.0709294	0.993693	0.0027479
YGR093W	DRN1	1.04179	0.0590655	0.993693	0.0027479
YFL049W	SWP82	1.041	0.0579764	0.993693	0.0027479
YLR287C-A	RPS30A	1.04146	0.0586096	0.993693	0.0027479
YNL289W	PCL1	1.05002	0.070422	0.993693	0.0027479
YGR073C		1.05109	0.071882	0.993693	0.0027479
YGL236C	MTO1	1.04346	0.0613729	0.993693	0.0027479
YBR262C	MIC12	1.04207	0.0594565	0.993693	0.0027479
YER068W	MOT2	1.04192	0.0592447	0.993693	0.0027479
YGR049W	SCM4	1.04324	0.0610749	0.993693	0.0027479
YGR168C		1.04311	0.0608899	0.993693	0.0027479
YJL180C	ATP12	1.04209	0.0594793	0.993693	0.0027479
YOR141C	ARP8	1.04233	0.0598121	0.993693	0.0027479
YMR174C	PAI3	0.955767	-0.0652691	0.993693	0.0027479
YMR193W	MRPL24	1.04271	0.060339	0.993693	0.0027479
YBR084C-A	RPL19A	0.960653	-0.0579125	0.993693	0.0027479
YNL232W	CSL4	0.95956	-0.0595548	0.993693	0.0027479
YKL020C	SPT23	0.96003	-0.0588488	0.993693	0.0027479
YDR151C	CTH1	0.959543	-0.0595806	0.993693	0.0027479
YHR112C		0.959098	-0.0602498	0.993693	0.0027479
YGL077C	HNM1	0.961162	-0.0571483	0.993693	0.0027479
YPL135W	ISU1	0.960652	-0.0579147	0.993693	0.0027479
YPR037C	ERV2	0.960133	-0.0586943	0.993693	0.0027479
YML041C	VPS71	1.0432	0.0610139	0.993693	0.0027479
YLR015W	BRE2	0.958891	-0.060562	0.993693	0.0027479
YJL153C	INO1	1.04405	0.0621961	0.993693	0.0027479
YPR159W	KRE6	0.961442	-0.0567282	0.993693	0.0027479
YBL047C	EDE1	0.960839	-0.0576329	0.993693	0.0027479
YFL022C	FRS2	0.960196	-0.0585991	0.993693	0.0027479
YMR189W	GCV2	1.04231	0.0597902	0.993693	0.0027479
YER007W	PAC2	0.957885	-0.0620764	0.993693	0.0027479
YPL258C	THI21	1.04463	0.0629943	0.993693	0.0027479
YHR108W	GGA2	1.04793	0.0675369	0.993693	0.0027479
YJR082C	EAF6	1.04356	0.0615198	0.993693	0.0027479
YKL213C	DOA1	0.961132	-0.0571928	0.993693	0.0027479
YAR019C	CDC15	0.959466	-0.059696	0.993693	0.0027479
YKL189W	HYM1	1.04289	0.0605912	0.993693	0.0027479
YMR207C	HFA1	0.960355	-0.0583599	0.993693	0.0027479
YGR087C	PDC6	0.952359	-0.0704226	0.993693	0.0027479
YOR178C	GAC1	0.952253	-0.0705831	0.993693	0.0027479
YJL029C	VPS53	1.04195	0.05929	0.993693	0.0027479
YJL161W	FMP33	0.958966	-0.0604485	0.993693	0.0027479
YNL087W	TCB2	0.960111	-0.0587273	0.993693	0.0027479
YEL060C	PRB1	0.960082	-0.0587707	0.993693	0.0027479
YOR266W	PNT1	1.04358	0.0615413	0.993693	0.0027479
YOR119C	RIO1	0.959505	-0.0596383	0.993693	0.0027479
YDR448W	ADA2	1.04192	0.0592401	0.993693	0.0027479
YPL133C	RDS2	0.958679	-0.0608807	0.993693	0.0027479
YIL028W		0.953753	-0.068312	0.993693	0.0027479
YOL073C	DSC2	1.043	0.0607449	0.993693	0.0027479
YHR016C	YSC84	0.95975	-0.0592689	0.993693	0.0027479
YDR302W	GPI11	1.0427	0.0603229	0.993693	0.0027479
YBL034C	STU1	1.04357	0.0615263	0.993693	0.0027479
YML114C	TAF8	0.957903	-0.062048	0.993693	0.0027479
YEL032W	MCM3	0.959398	-0.0597988	0.993693	0.0027479
YJR012C		1.04318	0.0609861	0.993693	0.0027479
YIL050W	PCL7	0.959599	-0.0594958	0.993693	0.0027479
YNR026C	SEC12	0.960043	-0.0588297	0.993693	0.0027479
YBR031W	RPL4A	1.04061	0.0574277	0.993693	0.0027479
YCL011C	GBP2	0.960519	-0.0581134	0.993693	0.0027479
YHR018C	ARG4	0.961224	-0.0570553	0.994981	0.00218522
YCR028C	FEN2	0.960474	-0.0581813	0.994989	0.0021816
YJL167W	ERG20	0.962273	-0.0554819	0.994989	0.0021816
YNL098C	RAS2	0.961894	-0.0560508	0.994989	0.0021816
YOR260W	GCD1	0.960943	-0.0574766	0.994989	0.0021816
YHR160C	PEX18	1.04957	0.0697916	0.994989	0.0021816
YMR135C	GID8	0.961336	-0.0568872	0.995143	0.00211463
YLR216C	CPR6	0.961554	-0.0565608	0.995143	0.00211463
YNL079C	TPM1	0.959686	-0.0593658	0.995143	0.00211463
YER058W	PET117	1.04276	0.0604107	0.995143	0.00211463
YJR041C	URB2	1.04094	0.0578829	0.995143	0.00211463
YOL084W	PHM7	0.957868	-0.0621015	0.995143	0.00211463
YKL176C	LST4	0.961063	-0.0572976	0.995143	0.00211463
YML106W	URA5	0.96226	-0.0555018	0.995143	0.00211463
YNL129W	NRK1	1.04133	0.0584316	0.995143	0.00211463
YCR042C	TAF2	0.961082	-0.0572689	0.995143	0.00211463
YDR256C	CTA1	1.04637	0.0653882	0.995143	0.00211463
YOR316C	COT1	1.04142	0.0585526	0.995143	0.00211463
YNR039C	ZRG17	1.0415	0.0586605	0.995143	0.00211463
YOR044W	IRC23	1.04241	0.0599263	0.995143	0.00211463
YJL006C	CTK2	1.04233	0.0598065	0.995143	0.00211463
YNL263C	YIF1	1.04157	0.0587598	0.995143	0.00211463
YBR179C	FZO1	1.04112	0.0581427	0.995143	0.00211463
YAL003W	EFB1	0.960692	-0.0578548	0.995143	0.00211463
YMR208W	ERG12	1.04007	0.0566831	0.995209	0.0020857
YIL004C	BET1	0.959872	-0.0590858	0.995209	0.0020857
YNL322C	KRE1	0.960877	-0.0575758	0.996205	0.00165147
YPL001W	HAT1	1.0414	0.0585256	0.996205	0.00165147
YBR223C	TDP1	0.959612	-0.0594764	0.9966	0.00147901
YMR225C	MRPL44	1.04163	0.0588422	0.9966	0.00147901
YGR282C	BGL2	0.963004	-0.0543863	0.9966	0.00147901
YPL220W	RPL1A	0.960586	-0.058014	0.9966	0.00147901
YDR515W	SLF1	1.04132	0.0584195	0.9966	0.00147901
YKL133C		1.04155	0.058728	0.9966	0.00147901
YIL002W-A		1.04094	0.0578907	0.9966	0.00147901
YDR266C	HEL2	1.04034	0.0570536	0.9966	0.00147901
YLR029C	RPL15A	0.961588	-0.0565098	0.996666	0.00145017
YDR400W	URH1	0.960462	-0.0582002	0.997579	0.00105277
YDL227C	HO	1.04105	0.058042	0.997579	0.00105277
YHL008C		0.960611	-0.0579753	0.999412	0.000255454
YDR075W	PPH3	1.04143	0.0585626	0.999412	0.000255454
YOR117W	RPT5	0.9633	-0.0539435	0.999412	0.000255454
YLR226W	BUR2	1.04231	0.0597884	0.999412	0.000255454
YCR047C	BUD23	0.960358	-0.0583553	0.999412	0.000255454
YNL172W	APC1	1.04105	0.058035	0.999412	0.000255454
YKL042W	SPC42	1.04219	0.0596208	0.999412	0.000255454
YKL164C	PIR1	0.961581	-0.0565197	0.999412	0.000255454
YJL121C	RPE1	1.03935	0.0556753	0.999412	0.000255454
YMR194W	RPL36A	0.961373	-0.0568324	0.999412	0.000255454
YLR138W	NHA1	0.961994	-0.0559006	0.999412	0.000255454
YKL056C	TMA19	0.961695	-0.0563485	0.999412	0.000255454
YNL215W	IES2	0.960934	-0.0574908	0.999412	0.000255454
YLL049W	LDB18	1.0418	0.0590779	0.999412	0.000255454
YOR362C	PRE10	0.963186	-0.0541142	0.999412	0.000255454
YJL225C		1.04168	0.0589133	0.999412	0.000255454
YLR172C	DPH5	1.03962	0.05605	0.999412	0.000255454
YDR074W	TPS2	0.963246	-0.0540235	0.999412	0.000255454
YOL129W	VPS68	0.961567	-0.0565408	0.999412	0.000255454
YPR093C	ASR1	0.959448	-0.0597231	0.999412	0.000255454
YLR412W	BER1	1.04074	0.0576068	0.999412	0.000255454
YGR046W	TAM41	1.03972	0.0561976	0.999412	0.000255454
YOR091W	TMA46	0.960839	-0.057634	0.999412	0.000255454
YJL055W		0.962258	-0.0555051	0.999412	0.000255454
YJL090C	DPB11	1.04062	0.0574494	0.999412	0.000255454
YAL067C	SEO1	1.04874	0.0686599	0.999412	0.000255454
YOL145C	CTR9	0.962659	-0.054904	0.999412	0.000255454
YNL042W	BOP3	0.960652	-0.0579145	0.999412	0.000255454
YOL033W	MSE1	0.960325	-0.0584055	0.999412	0.000255454
YKL015W	PUT3	1.03938	0.0557168	0.999412	0.000255454
YBR139W		1.04075	0.0576284	0.999412	0.000255454
YAL001C	TFC3	0.962001	-0.0558898	0.999412	0.000255454
YJR147W	HMS2	0.960031	-0.0588476	0.999412	0.000255454
YCR051W		0.961238	-0.0570341	0.999412	0.000255454
YMR040W	YET2	0.957778	-0.0622366	0.999412	0.000255454
YMR014W	BUD22	0.961405	-0.0567842	0.999412	0.000255454
YIL042C	PKP1	0.959444	-0.0597296	0.999412	0.000255454
YGL095C	VPS45	1.03973	0.056205	0.999412	0.000255454
YAL039C	CYC3	1.03995	0.0565131	0.999412	0.000255454
YIL031W	ULP2	0.960574	-0.0580315	0.999412	0.000255454
YGL177W		0.954971	-0.0664708	0.999412	0.000255454
YGL193C		1.04509	0.0636266	0.999412	0.000255454
YOR328W	PDR10	1.04031	0.0570073	0.999412	0.000255454
YPL189W	GUP2	0.955017	-0.0664021	0.999412	0.000255454
YDR414C	ERD1	1.04132	0.0584085	0.999412	0.000255454
YBR047W	FMP23	1.04438	0.0626407	0.999412	0.000255454
YDR115W		1.0411	0.0581078	0.999412	0.000255454
YNL317W	PFS2	1.04051	0.0572887	0.999412	0.000255454
YDR478W	SNM1	0.957908	-0.0620412	0.999412	0.000255454
YOR017W	PET127	1.04039	0.0571203	0.999412	0.000255454
YBR023C	CHS3	1.04001	0.0565949	0.999412	0.000255454
YCL057W	PRD1	0.961869	-0.0560877	0.999412	0.000255454
YFR044C	DUG1	0.962255	-0.0555083	0.999412	0.000255454
YKL086W	SRX1	0.955649	-0.0654479	0.999412	0.000255454
YJL199C	MBB1	1.04502	0.0635296	0.999412	0.000255454
YKR078W		1.04076	0.0576359	0.999412	0.000255454
YGL104C	VPS73	0.960351	-0.0583665	0.999412	0.000255454
YNL169C	PSD1	1.03958	0.0560058	0.999412	0.000255454
YOL122C	SMF1	0.961162	-0.0571481	0.999412	0.000255454
YIL026C	IRR1	1.04175	0.059013	0.999412	0.000255454
YDL045W-A	MRP10	1.04125	0.0583168	0.999412	0.000255454
YGL028C	SCW11	1.04634	0.0653508	0.999412	0.000255454
YNL157W	IGO1	1.03939	0.0557394	0.999412	0.000255454
YBR024W	SCO2	0.990067	-0.0144026	0.999545	0.000197548
YBR021W	FUR4	1.00083	0.00120364	0.999545	0.000197548
YGR014W	MSB2	0.962775	-0.0547291	0.999545	0.000197548
YKL119C	VPH2	0.987425	-0.0182562	0.999545	0.000197548
YPL174C	NIP100	0.997253	-0.00396876	0.999545	0.000197548
YIL003W	CFD1	0.96266	-0.0549017	0.999545	0.000197548
YMR129W	POM152	0.991293	-0.0126166	0.999545	0.000197548
YBR140C	IRA1	1.0176	0.0251708	0.999545	0.000197548
YKR047W		0.989044	-0.0158939	0.999545	0.000197548
YER091C	MET6	1.01745	0.0249518	0.999545	0.000197548
YMR121C	RPL15B	0.991948	-0.0116638	0.999545	0.000197548
YDR356W	SPC110	0.996099	-0.00563929	0.999545	0.000197548
YDR337W	MRPS28	1.02043	0.0291842	0.999545	0.000197548
YKL008C	LAC1	1.00568	0.00817511	0.999545	0.000197548
YER055C	HIS1	0.97896	-0.0306783	0.999545	0.000197548
YFR004W	RPN11	1.01991	0.0284425	0.999545	0.000197548
YDR108W	TRS85	1.00333	0.00479853	0.999545	0.000197548
YJR134C	SGM1	0.993459	-0.00946833	0.999545	0.000197548
YGR012W		1.00347	0.00499556	0.999545	0.000197548
YNL244C	SUI1	1.01243	0.0178259	0.999545	0.000197548
YOR027W	STI1	0.974475	-0.0373035	0.999545	0.000197548
YBL101C	ECM21	0.981082	-0.0275545	0.999545	0.000197548
YLL040C	VPS13	1.03211	0.0455952	0.999545	0.000197548
YDR181C	SAS4	0.983421	-0.0241183	0.999545	0.000197548
YJL210W	PEX2	0.986094	-0.0202022	0.999545	0.000197548
YMR021C	MAC1	1.02117	0.0302162	0.999545	0.000197548
YBL058W	SHP1	1.00169	0.00244307	0.999545	0.000197548
YLR088W	GAA1	0.992975	-0.0101712	0.999545	0.000197548
YKL128C	PMU1	0.974645	-0.0370519	0.999545	0.000197548
YLR100W	ERG27	0.972589	-0.0400978	0.999545	0.000197548
YOR292C		0.991604	-0.0121643	0.999545	0.000197548
YNL219C	ALG9	1.03167	0.0449805	0.999545	0.000197548
YPR179C	HDA3	1.00244	0.00350898	0.999545	0.000197548
YDR540C	IRC4	0.963923	-0.0530108	0.999545	0.000197548
YOL140W	ARG8	0.971105	-0.0423005	0.999545	0.000197548
YFL009W	CDC4	1.01502	0.0215061	0.999545	0.000197548
YLL004W	ORC3	1.02125	0.0303323	0.999545	0.000197548
YKL057C	NUP120	0.995708	-0.00620588	0.999545	0.000197548
YDL046W	NPC2	1.00543	0.00781838	0.999545	0.000197548
YPR150W		1.00733	0.0105303	0.999545	0.000197548
YGL157W	ARI1	1.00757	0.0108848	0.999545	0.000197548
YDR252W	BTT1	0.976551	-0.0342332	0.999545	0.000197548
YLR037C	PAU23	0.969659	-0.0444499	0.999545	0.000197548
YAL040C	CLN3	0.998041	-0.002829	0.999545	0.000197548
YGL232W	TAN1	1.0178	0.0254471	0.999545	0.000197548
YHR181W	SVP26	1.00875	0.0125729	0.999545	0.000197548
YPL259C	APM1	1.0003	0.000435716	0.999545	0.000197548
YJL087C	TRL1	0.982285	-0.0257863	0.999545	0.000197548
YIR005W	IST3	1.02113	0.0301716	0.999545	0.000197548
YJL209W	CBP1	0.997374	-0.00379398	0.999545	0.000197548
YLR286C	CTS1	1.01057	0.0151703	0.999545	0.000197548
YEL044W	IES6	1.00753	0.0108209	0.999545	0.000197548
YLR071C	RGR1	1.02165	0.030895	0.999545	0.000197548
YBL050W	SEC17	0.981045	-0.0276087	0.999545	0.000197548
YHL001W	RPL14B	0.97265	-0.0400073	0.999545	0.000197548
YJR042W	NUP85	0.965558	-0.0505647	0.999545	0.000197548
YNL185C	MRPL19	1.01645	0.0235356	0.999545	0.000197548
YBR129C	OPY1	1.02547	0.0362835	0.999545	0.000197548
YOR061W	CKA2	0.993737	-0.00906406	0.999545	0.000197548
YDR068W	DOS2	0.989918	-0.0146194	0.999545	0.000197548
YJL128C	PBS2	0.985109	-0.0216445	0.999545	0.000197548
YPL228W	CET1	1.01279	0.0183342	0.999545	0.000197548
YML036W	CGI121	1.02071	0.0295786	0.999545	0.000197548
YKL114C	APN1	0.984241	-0.0229169	0.999545	0.000197548
YDR248C		0.966258	-0.0495203	0.999545	0.000197548
YPL199C		0.984194	-0.0229853	0.999545	0.000197548
YNL136W	EAF7	0.975566	-0.0356879	0.999545	0.000197548
YOR316C-A		1.04209	0.0594753	0.999545	0.000197548
YNL264C	PDR17	0.99098	-0.0130724	0.999545	0.000197548
YLR320W	MMS22	1.02534	0.0360962	0.999545	0.000197548
YKL098W	MTC2	1.00314	0.00452733	0.999545	0.000197548
YBR063C		1.02336	0.0333169	0.999545	0.000197548
YLL013C	PUF3	0.98695	-0.0189517	0.999545	0.000197548
YKR067W	GPT2	1.01691	0.0241917	0.999545	0.000197548
YLR040C	AFB1	0.982949	-0.0248115	0.999545	0.000197548
YIL072W	HOP1	1.01333	0.0191054	0.999545	0.000197548
YCR016W		0.978397	-0.0315083	0.999545	0.000197548
YEL020C		1.00241	0.00346773	0.999545	0.000197548
YDL136W	RPL35B	0.992634	-0.0106665	0.999545	0.000197548
YOR076C	SKI7	1.03464	0.0491348	0.999545	0.000197548
YDR104C	SPO71	1.01074	0.0154171	0.999545	0.000197548
YBR279W	PAF1	1.00292	0.00420289	0.999545	0.000197548
YLR067C	PET309	1.00521	0.00750094	0.999545	0.000197548
YHR219W		0.985909	-0.0204729	0.999545	0.000197548
YLR456W		1.03547	0.0502919	0.999545	0.000197548
YDL027C		1.02665	0.0379493	0.999545	0.000197548
YKR023W		0.995815	-0.00605027	0.999545	0.000197548
YGR028W	MSP1	1.00951	0.0136576	0.999545	0.000197548
YJL102W	MEF2	1.00399	0.00573958	0.999545	0.000197548
YDR217C	RAD9	0.992485	-0.0108833	0.999545	0.000197548
YMR194C-A		1.0137	0.0196276	0.999545	0.000197548
YKL033W	TTI1	0.981908	-0.0263398	0.999545	0.000197548
YOR223W	DSC3	0.998873	-0.00162728	0.999545	0.000197548
YBR260C	RGD1	0.986144	-0.0201304	0.999545	0.000197548
YLR359W	ADE13	1.00206	0.00296954	0.999545	0.000197548
YDR022C	ATG31	0.992401	-0.011005	0.999545	0.000197548
YDR459C	PFA5	1.00907	0.0130226	0.999545	0.000197548
YNL184C		0.996687	-0.00478747	0.999545	0.000197548
YDR293C	SSD1	1.00641	0.00921352	0.999545	0.000197548
YMR173W	DDR48	0.99801	-0.00287361	0.999545	0.000197548
YDR374W-A	WIP1	1.01367	0.0195873	0.999545	0.000197548
YAL007C	ERP2	1.01172	0.0168096	0.999545	0.000197548
YGL134W	PCL10	1.00671	0.00964564	0.999545	0.000197548
YDR366C		1.01011	0.0145158	0.999545	0.000197548
YHR023W	MYO1	0.965364	-0.0508553	0.999545	0.000197548
YDR430C	CYM1	1.03213	0.0456282	0.999545	0.000197548
YGR002C	SWC4	0.993855	-0.0088922	0.999545	0.000197548
YNL220W	ADE12	0.971627	-0.0415261	0.999545	0.000197548
YBR109W-A		0.976687	-0.0340316	0.999545	0.000197548
YHR110W	ERP5	0.982593	-0.0253337	0.999545	0.000197548
YBR073W	RDH54	0.984207	-0.0229661	0.999545	0.000197548
YPL119C	DBP1	0.985557	-0.0209888	0.999545	0.000197548
YNL159C	ASI2	1.01709	0.0244448	0.999545	0.000197548
YFR048W	RMD8	1.00661	0.00950021	0.999545	0.000197548
YDR016C	DAD1	0.99567	-0.00626069	0.999545	0.000197548
YKL215C	OXP1	0.984028	-0.0232281	0.999545	0.000197548
YML035C	AMD1	1.00493	0.00709809	0.999545	0.000197548
YDL059C	RAD59	0.988593	-0.0165515	0.999545	0.000197548
YOR257W	CDC31	1.01658	0.0237265	0.999545	0.000197548
YNL144C		0.978731	-0.0310154	0.999545	0.000197548
YOR301W	RAX1	1.02357	0.0336085	0.999545	0.000197548
YHR157W	REC104	1.01843	0.0263438	0.999545	0.000197548
YPL008W	CHL1	0.997488	-0.0036289	0.999545	0.000197548
YGL032C	AGA2	0.994065	-0.0085873	0.999545	0.000197548
YGR174W-A		1.00496	0.00714455	0.999545	0.000197548
YOR148C	SPP2	0.997605	-0.00346006	0.999545	0.000197548
YHL048W	COS8	1.0404	0.0571422	0.999545	0.000197548
YPR085C	ASA1	0.978264	-0.031704	0.999545	0.000197548
YBL095W		0.984116	-0.0230992	0.999545	0.000197548
YGR054W		0.987107	-0.0187219	0.999545	0.000197548
YMR022W	UBC7	1.02307	0.0329054	0.999545	0.000197548
YCR027C	RHB1	1.02975	0.0422984	0.999545	0.000197548
YNL278W	CAF120	1.02725	0.0387868	0.999545	0.000197548
YLR395C	COX8	1.01295	0.0185604	0.999545	0.000197548
YKL023W		1.0183	0.0261575	0.999545	0.000197548
YPL106C	SSE1	0.98976	-0.0148491	0.999545	0.000197548
YIR021W	MRS1	1.03066	0.043569	0.999545	0.000197548
YLL022C	HIF1	0.997474	-0.00364825	0.999545	0.000197548
YPR002C-A		1.02874	0.0408794	0.999545	0.000197548
YOR299W	BUD7	1.03013	0.0428212	0.999545	0.000197548
YEL023C		1.01157	0.0165908	0.999545	0.000197548
YDR411C	DFM1	1.00297	0.00428002	0.999545	0.000197548
YKL025C	PAN3	1.0235	0.033518	0.999545	0.000197548
YLR225C		1.02048	0.0292523	0.999545	0.000197548
YPR029C	APL4	0.995395	-0.00665877	0.999545	0.000197548
YDR088C	SLU7	1.03397	0.0481921	0.999545	0.000197548
YFL004W	VTC2	1.01524	0.021825	0.999545	0.000197548
YDR369C	XRS2	1.00391	0.0056267	0.999545	0.000197548
YGL090W	LIF1	0.970848	-0.042682	0.999545	0.000197548
YDR094W		0.955998	-0.0649206	0.999545	0.000197548
YNL027W	CRZ1	0.971201	-0.0421576	0.999545	0.000197548
YJL083W	TAX4	0.966656	-0.0489248	0.999545	0.000197548
YOR353C	SOG2	1.02236	0.0319037	0.999545	0.000197548
YJR132W	NMD5	0.986944	-0.0189606	0.999545	0.000197548
YPL060W	MFM1	1.00412	0.00592942	0.999545	0.000197548
YNL333W	SNZ2	0.983642	-0.0237942	0.999545	0.000197548
YCL038C	ATG22	0.993484	-0.00943193	0.999545	0.000197548
YBL035C	POL12	1.00792	0.0113869	0.999545	0.000197548
YJL092W	SRS2	0.997589	-0.00348319	0.999545	0.000197548
YGL010W	MPO1	1.00995	0.0142822	0.999545	0.000197548
YJL031C	BET4	1.02727	0.0388165	0.999545	0.000197548
YLR016C	PML1	0.961583	-0.0565172	0.999545	0.000197548
YOL116W	MSN1	0.976367	-0.0345052	0.999545	0.000197548
YGR019W	UGA1	0.994791	-0.00753491	0.999545	0.000197548
YMR137C	PSO2	0.996166	-0.00554262	0.999545	0.000197548
YLR034C	SMF3	1.03187	0.0452663	0.999545	0.000197548
YOL041C	NOP12	0.973434	-0.0388444	0.999545	0.000197548
YDL198C	GGC1	1.01625	0.0232589	0.999545	0.000197548
YHR118C	ORC6	0.979256	-0.0302416	0.999545	0.000197548
YJL097W	PHS1	1.02172	0.0310014	0.999545	0.000197548
YDL120W	YFH1	0.97489	-0.0366879	0.999545	0.000197548
YLR292C	SEC72	1.01868	0.0266995	0.999545	0.000197548
YPR170W-B		0.990266	-0.014112	0.999545	0.000197548
YPR016C	TIF6	0.964073	-0.0527854	0.999545	0.000197548
YNL103W	MET4	1.03127	0.0444252	0.999545	0.000197548
YJL148W	RPA34	0.973765	-0.0383551	0.999545	0.000197548
YER039C-A		1.01158	0.0166153	0.999545	0.000197548
YDR421W	ARO80	0.991108	-0.0128864	0.999545	0.000197548
YGL051W	MST27	0.987844	-0.0176445	0.999545	0.000197548
YNL243W	SLA2	1.01855	0.026515	0.999545	0.000197548
YER110C	KAP123	1.00416	0.00599597	0.999545	0.000197548
YLL027W	ISA1	1.03821	0.054102	0.999545	0.000197548
YOL060C	MAM3	1.02886	0.0410422	0.999545	0.000197548
YCL051W	LRE1	1.01976	0.0282346	0.999545	0.000197548
YOL102C	TPT1	1.02588	0.0368627	0.999545	0.000197548
YGR065C	VHT1	1.03785	0.0535971	0.999545	0.000197548
YMR292W	GOT1	0.999555	-0.000641873	0.999545	0.000197548
YBL021C	HAP3	1.02325	0.0331645	0.999545	0.000197548
YPR026W	ATH1	1.01038	0.0149049	0.999545	0.000197548
YLR421C	RPN13	0.97491	-0.0366594	0.999545	0.000197548
YAL058W	CNE1	1.03264	0.0463312	0.999545	0.000197548
YDR119W-A	COX26	0.999336	-0.000958712	0.999545	0.000197548
YNL212W	VID27	0.969479	-0.0447186	0.999545	0.000197548
YCR030C	SYP1	0.968265	-0.0465258	0.999545	0.000197548
YGR048W	UFD1	1.02624	0.0373738	0.999545	0.000197548
YPL249C	GYP5	1.02658	0.0378457	0.999545	0.000197548
YDR263C	DIN7	1.01853	0.0264926	0.999545	0.000197548
YOR244W	ESA1	1.02855	0.0406157	0.999545	0.000197548
YBR201C-A		1.03474	0.0492622	0.999545	0.000197548
YDR007W	TRP1	0.984559	-0.0224499	0.999545	0.000197548
YER019W	ISC1	1.033	0.0468407	0.999545	0.000197548
YIR016W		1.01013	0.0145357	0.999545	0.000197548
YIL069C	RPS24B	0.976965	-0.0336211	0.999545	0.000197548
YLR440C	SEC39	1.00445	0.00639932	0.999545	0.000197548
YER042W	MXR1	1.00959	0.01377	0.999545	0.000197548
YML116W	ATR1	0.973104	-0.0393346	0.999545	0.000197548
YHR058C	MED6	0.976555	-0.0342269	0.999545	0.000197548
YMR265C		0.983277	-0.0243295	0.999545	0.000197548
YPL109C		0.983437	-0.0240957	0.999545	0.000197548
YPL204W	HRR25	1.00204	0.0029403	0.999545	0.000197548
YOR047C	STD1	1.01378	0.0197399	0.999545	0.000197548
YLR222C	UTP13	1.01564	0.0223835	0.999545	0.000197548
YPR183W	DPM1	0.997216	-0.00402213	0.999545	0.000197548
YER077C		0.997184	-0.00406823	0.999545	0.000197548
YDR348C	PAL1	1.03431	0.0486673	0.999545	0.000197548
YGR295C	COS6	0.970347	-0.0434267	0.999545	0.000197548
YER039C	HVG1	1.01574	0.0225323	0.999545	0.000197548
YPL230W	USV1	0.998962	-0.00149866	0.999545	0.000197548
YFL007W	BLM10	0.994198	-0.00839435	0.999545	0.000197548
YLR371W	ROM2	1.02395	0.034149	0.999545	0.000197548
YMR061W	RNA14	1.02716	0.0386553	0.999545	0.000197548
YMR288W	HSH155	1.01909	0.0272794	0.999545	0.000197548
YMR166C		0.994124	-0.00850207	0.999545	0.000197548
YHR142W	CHS7	0.9751	-0.0363776	0.999545	0.000197548
YJR111C		1.03606	0.0511102	0.999545	0.000197548
YPL152W	RRD2	1.03252	0.0461763	0.999545	0.000197548
YJR113C	RSM7	1.00527	0.00757926	0.999545	0.000197548
YDR131C		1.00423	0.00609312	0.999545	0.000197548
YEL020W-A	TIM9	1.02963	0.0421242	0.999545	0.000197548
YBR125C	PTC4	1.02789	0.0396883	0.999545	0.000197548
YPL216W		0.976814	-0.0338443	0.999545	0.000197548
YEL012W	UBC8	1.03032	0.0430905	0.999545	0.000197548
YLR179C		0.981853	-0.0264211	0.999545	0.000197548
YDR297W	SUR2	0.969763	-0.0442961	0.999545	0.000197548
YBR191W	RPL21A	0.980019	-0.029118	0.999545	0.000197548
YKL060C	FBA1	0.977507	-0.0328213	0.999545	0.000197548
YJL205C	NCE101	1.00486	0.00699684	0.999545	0.000197548
YGL133W	ITC1	0.982021	-0.0261739	0.999545	0.000197548
YOR355W	GDS1	0.99869	-0.00189095	0.999545	0.000197548
YIL061C	SNP1	1.00222	0.00320447	0.999545	0.000197548
YGR078C	PAC10	0.977814	-0.0323679	0.999545	0.000197548
YPL082C	MOT1	1.0376	0.0532478	0.999545	0.000197548
YMR101C	SRT1	1.00219	0.0031562	0.999545	0.000197548
YDL088C	ASM4	0.99664	-0.00485593	0.999545	0.000197548
YCR081W	SRB8	1.03711	0.0525713	0.999545	0.000197548
YHR143W-A	RPC10	1.00844	0.0121212	0.999545	0.000197548
YMR212C	EFR3	0.988532	-0.016641	0.999545	0.000197548
YFL027C	GYP8	0.992404	-0.011	0.999545	0.000197548
YBL032W	HEK2	0.98009	-0.0290144	0.999545	0.000197548
YFR039C	OSW7	0.994906	-0.00736772	0.999545	0.000197548
YER184C	TOG1	0.980941	-0.0277614	0.999545	0.000197548
YIL009C-A	EST3	1.0357	0.0505993	0.999545	0.000197548
YER060W-A	FCY22	0.960722	-0.0578093	0.999545	0.000197548
YNL135C	FPR1	0.98488	-0.0219803	0.999545	0.000197548
YNL032W	SIW14	0.978129	-0.0319031	0.999545	0.000197548
YHR060W	VMA22	1.01792	0.0256261	0.999545	0.000197548
YMR127C	SAS2	0.985035	-0.0217527	0.999545	0.000197548
YDL223C	HBT1	1.0071	0.0102117	0.999545	0.000197548
YDR167W	TAF10	0.984712	-0.0222264	0.999545	0.000197548
YPL146C	NOP53	0.97238	-0.040408	0.999545	0.000197548
YPR133W-A	TOM5	1.01505	0.0215461	0.999545	0.000197548
YAL044C	GCV3	1.02304	0.032869	0.999545	0.000197548
YNL046W		1.03255	0.0462082	0.999545	0.000197548
YJL003W	COX16	1.02067	0.029518	0.999545	0.000197548
YNL325C	FIG4	1.00187	0.00269478	0.999545	0.000197548
YLR369W	SSQ1	0.965376	-0.0508364	0.999545	0.000197548
YGL004C	RPN14	0.974281	-0.0375896	0.999545	0.000197548
YMR013C	SEC59	1.0179	0.0256013	0.999545	0.000197548
YHL013C	OTU2	0.997886	-0.00305281	0.999545	0.000197548
YIL089W		1.01943	0.0277624	0.999545	0.000197548
YNL062C	GCD10	0.966357	-0.0493715	0.999545	0.000197548
YML059C	NTE1	0.998817	-0.00170769	0.999545	0.000197548
YPL036W	PMA2	0.97743	-0.0329354	0.999545	0.000197548
YBL061C	SKT5	0.971054	-0.0423773	0.999545	0.000197548
YIL166C		1.03239	0.0459935	0.999545	0.000197548
YHR216W	IMD2	0.972112	-0.0408054	0.999545	0.000197548
YER182W	FMP10	0.980253	-0.0287736	0.999545	0.000197548
YKR005C		1.03384	0.0480156	0.999545	0.000197548
YBL083C		0.958766	-0.0607487	0.999545	0.000197548
YCL056C	PEX34	1.00626	0.00899859	0.999545	0.000197548
YLR332W	MID2	1.01529	0.0218863	0.999545	0.000197548
YNL285W		1.0146	0.020908	0.999545	0.000197548
YOL066C	RIB2	0.969818	-0.0442136	0.999545	0.000197548
YNL247W		1.03037	0.0431573	0.999545	0.000197548
YPR102C	RPL11A	0.979007	-0.0306086	0.999545	0.000197548
YGL175C	SAE2	1.03684	0.052197	0.999545	0.000197548
YHR107C	CDC12	1.02863	0.0407289	0.999545	0.000197548
YLR050C		1.00967	0.013887	0.999545	0.000197548
YNL161W	CBK1	1.01954	0.0279211	0.999545	0.000197548
YMR306W	FKS3	0.961086	-0.0572621	0.999545	0.000197548
YGL128C	CWC23	0.967418	-0.0477889	0.999545	0.000197548
YPR048W	TAH18	0.98218	-0.0259401	0.999545	0.000197548
YLR345W		1.01637	0.0234198	0.999545	0.000197548
YPR140W	TAZ1	1.02011	0.0287306	0.999545	0.000197548
YKL208W	CBT1	1.00074	0.00106399	0.999545	0.000197548
YKL058W	TOA2	0.984903	-0.0219459	0.999545	0.000197548
YHR209W	CRG1	0.982391	-0.0256312	0.999545	0.000197548
YJL082W	IML2	0.997482	-0.00363769	0.999545	0.000197548
YKR017C	HEL1	0.99556	-0.00642008	0.999545	0.000197548
YER126C	NSA2	0.968001	-0.0469193	0.999545	0.000197548
YDR110W	FOB1	0.992226	-0.0112591	0.999545	0.000197548
YGL033W	HOP2	0.985627	-0.0208865	0.999545	0.000197548
YGR165W	MRPS35	1.00042	0.000604136	0.999545	0.000197548
[truncated: 3,677 more rows]
