# Supplementary material for: Variation in ubiquitin system genes creates substrate-specific effects on proteasomal protein degradation
Source: eLife journal article supplement (doi:10.7554/elife.79570), 2022-10-11
Supplement: supp [file elife_poa_e79570_Figure_2_source_data_1.xlsx]

## Sheet: Sheet1
reporter	chr	LOD	delta_AF	left_Index	max_Index	right_Index
Ala_TFT	1	88.76	-0.448055	16650	37400	43300
Ala_TFT	2	6.705	0.086435	598100	635900	664300
Ala_TFT	4	15.37	0.1616	424950	456500	477850
Ala_TFT	5	52.935	0.32657	360100	376500	389100
Ala_TFT	7	12.34	-0.154895	98800	132350	164150
Ala_TFT	7	35.115	0.24047	381300	395050	417650
Ala_TFT	9	24.49	0.20963	275350	292050	314450
Ala_TFT	10	29.795	0.235905	311700	324900	344100
Ala_TFT	10	15.165	0.148645	582000	611300	637900
Ala_TFT	11	7.875	-0.11098	295300	358800	427100
Ala_TFT	12	6.285	0.114595	150700	187200	218750
Ala_TFT	12	85.695	-0.38252	645500	653600	665100
Ala_TFT	13	9.645	-0.16201	0	24650	58950
Ala_TFT	15	11.89	0.13817	346700	392500	429650
Ala_TFT	16	15.045	0.14788	178400	202400	222950
Arg_TFT	2	13.83	0.1358	518350	540400	592300
Arg_TFT	7	7.285	-0.11965	829050	861950	892350
Arg_TFT	10	19.015	0.17025	326500	344600	399900
Arg_TFT	10	9.17	0.0982	623700	655350	693300
Arg_TFT	11	5.365	-0.0955	248100	280150	325950
Arg_TFT	13	17.945	0.183	242450	262600	302700
Arg_TFT	15	18.46	-0.1761	138600	158950	187900
Asn_TFT	4	6.235	-0.09935	448100	511950	588850
Asn_TFT	7	6.775	-0.1369	0	14200	37850
Asn_TFT	7	6.815	0.0931	420750	483050	535050
Asn_TFT	7	7.56	-0.10905	839250	873900	905650
Asn_TFT	10	51.585	0.30635	538900	552400	561700
Asn_TFT	13	9.485	0.12155	268200	324850	357850
Asn_TFT	15	18.305	-0.1805	138600	171700	192750
Asp_TFT	2	6	0.0973	533900	599300	673350
Asp_TFT	4	10.255	-0.11415	336450	484450	525150
Asp_TFT	7	30.865	-0.2417	855600	873250	901800
Asp_TFT	8	10.04	0.1237	92100	122500	195050
Asp_TFT	12	16.29	0.17185	634450	653750	680250
Asp_TFT	13	14.78	0.1729	250650	279800	310000
Asp_TFT	14	166.93	0.56335	458700	467750	476050
Asp_TFT	15	16.215	-0.16895	124950	157050	175200
Cys_TFT	1	32.145	-0.2551	18500	45200	55500
Cys_TFT	5	14.655	0.1614	352550	371450	400350
Cys_TFT	7	8.265	-0.10875	99350	125850	169600
Cys_TFT	7	7.9	0.1164	345000	384000	420600
Cys_TFT	10	31.19	0.2401	321850	333150	351550
Cys_TFT	10	11.19	0.14125	588400	626100	660250
Cys_TFT	11	9.38	-0.08975	336800	372550	403200
Cys_TFT	12	55.05	-0.29505	645650	654300	675050
Cys_TFT	15	8.815	-0.0963	518550	569750	594650
Gln_TFT	4	6.88	-0.106305	0	93600	119150
Gln_TFT	10	28.17	0.179815	362900	400000	406900
Gln_TFT	10	38.6	0.264665	615850	633150	654850
Glu_TFT	4	8.82	-0.137985	0	51000	86450
Glu_TFT	12	10.505	0.112935	636800	665600	697400
Glu_TFT	13	8.145	0.11986	277100	307450	356550
Glu_TFT	15	7.76	-0.116595	138600	174500	198500
Gly_TFT	1	60.245	-0.36179	0	39350	44950
Gly_TFT	4	6.075	-0.07604	106800	133550	159500
Gly_TFT	5	47.575	0.262345	349900	360600	382800
Gly_TFT	7	7.225	-0.112255	106750	148550	192600
Gly_TFT	7	14.59	0.173165	382050	409450	437950
Gly_TFT	9	28.165	0.216785	267650	284700	303100
Gly_TFT	10	18.97	0.16833	319350	344050	369000
Gly_TFT	12	38.045	-0.243495	640950	651700	671500
Gly_TFT	16	6.175	0.087575	167350	211900	258900
His_TFT	4	7.35	-0.10975	11200	72500	101000
His_TFT	7	10.26	0.13975	841450	877700	904250
His_TFT	9	4.79	0.109	86300	129100	165050
His_TFT	11	16.025	0.15215	118750	156450	173600
His_TFT	12	6.425	0.0638	670700	727500	742700
His_TFT	13	16.945	0.17035	46750	75000	102950
His_TFT	13	22.73	0.1876	305700	322850	339850
His_TFT	14	25.96	-0.19935	444000	458750	474000
His_TFT	15	38.345	-0.2682	147500	157850	172250
Ile_TFT	12	5.545	0.0838	616600	649650	690250
Leu_TFT	7	27.585	0.2197	844350	862650	880150
Leu_TFT	14	18.285	-0.151	438550	458950	491250
Lys_TFT	2	12.99	0.1472	499850	548750	579750
Lys_TFT	8	6.72	0.0841	145650	174300	192300
Lys_TFT	9	5.4	0.0884	102800	132450	170950
Lys_TFT	10	23.175	0.1929	331250	353750	371200
Lys_TFT	13	25.815	0.23545	248000	279450	322550
Lys_TFT	14	44.705	-0.2534	453700	464800	477050
Lys_TFT	15	32.595	-0.2387	149500	167700	180300
Met_TFT	2	5.05	0.0922	524650	603800	690350
Met_TFT	12	20.76	-0.1721	638900	656650	680300
Met_TFT	14	15.38	-0.1648	453350	483600	522450
Met_TFT	15	17	-0.17275	138150	163350	178500
Phe_TFT	2	6.525	0.1075	402150	457400	549750
Phe_TFT	4	7.98	0.1294	348450	431900	485650
Phe_TFT	7	16.21	0.1652	390600	409700	448450
Phe_TFT	7	168	0.5628	864500	870950	877350
Phe_TFT	10	27.915	0.1742	315600	338900	371100
Phe_TFT	11	10.575	-0.14335	209250	267900	302900
Phe_TFT	12	81.77	-0.3636	647400	653450	660200
Phe_TFT	13	12.88	0.1198	16850	38050	52400
Phe_TFT	14	229.33	-0.61735	457200	463750	468450
Phe_TFT	15	13.175	-0.14075	93100	159800	193250
Pro_TFT	1	19.42	-0.2199	0	38150	50950
Pro_TFT	4	22.93	0.1979	432150	450750	489050
Pro_TFT	5	14.05	0.1374	337750	373550	427900
Pro_TFT	7	25.02	-0.20335	124800	144950	189100
Pro_TFT	7	32.255	0.21765	411500	424150	436750
Pro_TFT	9	7.57	0.11865	255900	294400	332550
Pro_TFT	10	21.135	0.15565	339800	353700	368800
Pro_TFT	12	10.215	0.1376	163700	206900	234950
Pro_TFT	12	11.92	-0.1345	638150	656750	689600
Pro_TFT	14	39.035	-0.25835	441450	459200	480400
Pro_TFT	15	6.89	0.08105	327750	368300	415100
Pro_TFT	16	7.29	0.0936	95650	138050	163750
Pro_TFT	16	24.505	-0.2202	375050	403350	428950
Ser_TFT	1	26.05	-0.321135	0	36750	66600
Ser_TFT	4	14.085	0.17641	396000	417850	450450
Ser_TFT	5	25	0.24358	362150	385550	407200
Ser_TFT	7	21.145	-0.21094	104950	124550	149500
Ser_TFT	7	29.39	0.246805	386450	405650	421500
Ser_TFT	9	13.375	0.1754	270500	293000	318450
Ser_TFT	10	13.29	0.16862	307750	335000	378650
Ser_TFT	12	22.275	-0.168965	680850	693400	703500
Ser_TFT	15	12.12	0.135125	528500	563850	602300
Thr_TFT	1	53.75	-0.389625	0	37100	48600
Thr_TFT	4	8.31	0.12358	372200	422500	469800
Thr_TFT	5	79.8	0.399635	365050	373750	384200
Thr_TFT	7	18.25	-0.173025	84150	111350	168600
Thr_TFT	7	30.9	0.24605	388150	404400	420600
Thr_TFT	9	51.84	0.292415	264600	285800	303750
Thr_TFT	11	8.815	-0.091615	365700	419550	484600
Thr_TFT	12	58.82	-0.314	647000	662800	675750
Thr_TFT	14	6.565	0.10824	440750	473950	532000
Thr_TFT	15	11.58	0.128925	354100	403350	449150
Thr_TFT	15	9.03	0.121195	521900	559200	581250
Thr_TFT	16	17.935	0.16621	203850	218600	241050
Trp_TFT	4	17.07	0.145	287150	373800	408600
Trp_TFT	7	9.25	0.12945	389250	421600	467200
Trp_TFT	7	219.545	0.66245	865350	870600	877800
Trp_TFT	10	15.1	0.1735	301200	320500	348800
Trp_TFT	12	35.57	-0.25335	635900	652900	671550
Trp_TFT	14	230.205	-0.6614	458750	466100	472450
Tyr_TFT	4	17.88	0.1587	259200	280800	316600
Tyr_TFT	7	5.845	0.0876	417950	450900	490650
Tyr_TFT	7	112.15	0.4593	864950	873000	879600
Tyr_TFT	8	6.04	-0.1014	50150	98050	127300
Tyr_TFT	10	13.32	0.1395	325000	351750	373050
Tyr_TFT	12	23.57	-0.1881	631450	644700	663300
Tyr_TFT	14	111.145	-0.42775	458850	468000	477250
Val_TFT	1	34.385	-0.27935	0	41850	54950
Val_TFT	5	28.69	0.2028	332300	363550	382200
Val_TFT	7	7.705	-0.12835	68450	141850	172400
Val_TFT	7	9.3	0.12095	376350	417100	468100
Val_TFT	9	15.53	0.1547	271850	299000	320200
Val_TFT	12	30.045	-0.2297	636800	649400	666100
Val_TFT	16	11.555	0.1114	184900	203200	223700
