# Supplementary material for: Variation in ubiquitin system genes creates substrate-specific effects on proteasomal protein degradation
Source: eLife journal article supplement (doi:10.7554/elife.79570), 2022-10-11

- Homozygous RM Allele
- Homozygous BY Allele
- Heterozygous RM / BY Allele

***UBR1* -469A>T**  
RM allele frequency = 99.0%

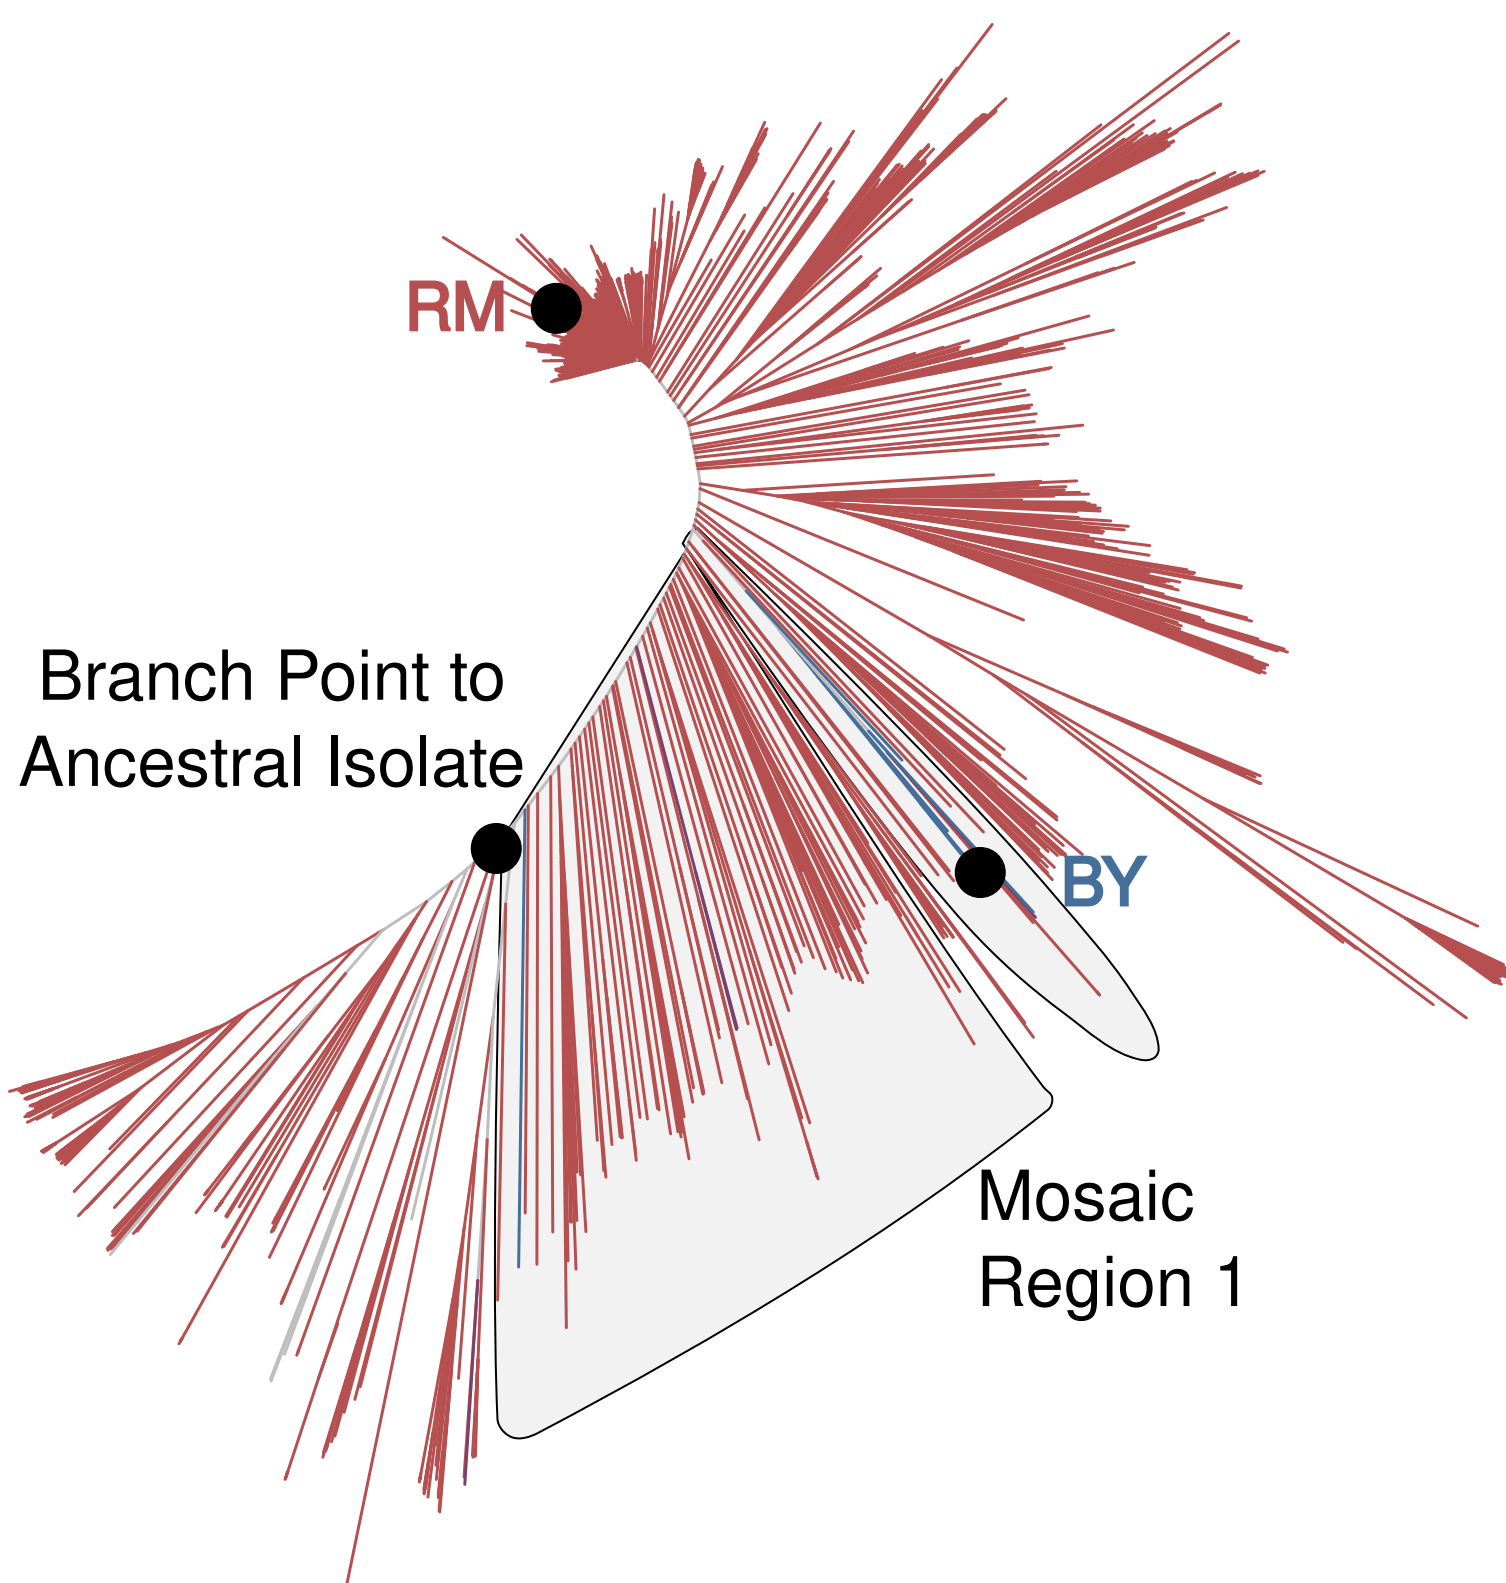

***NTA1* E129G**  
RM allele frequency = 51.5%

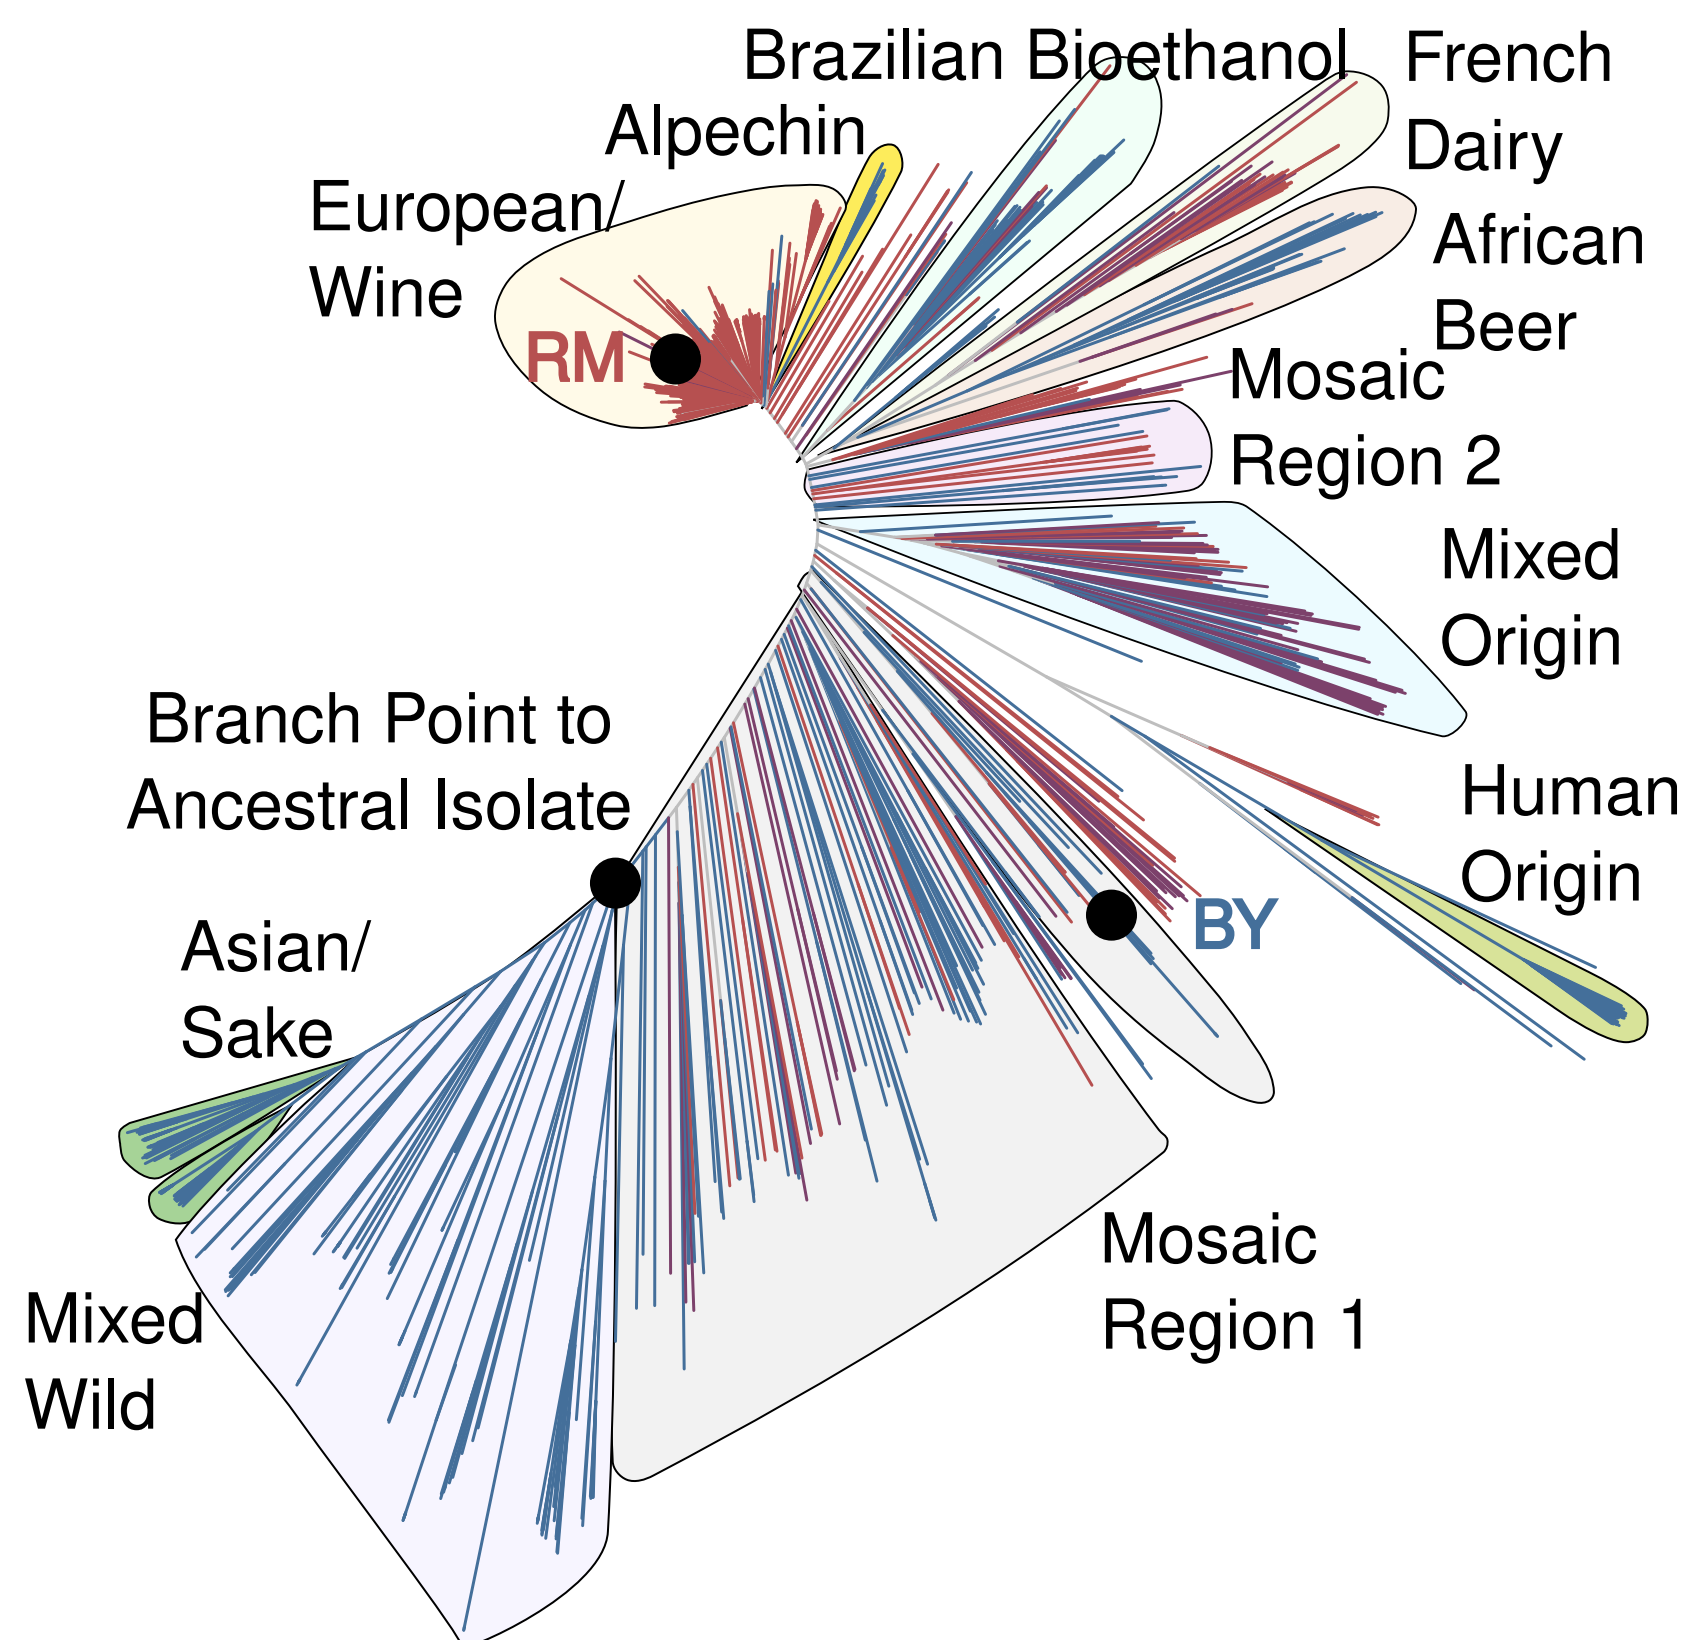

***DOA10* Y1186F**  
RM allele frequency = 94.9%

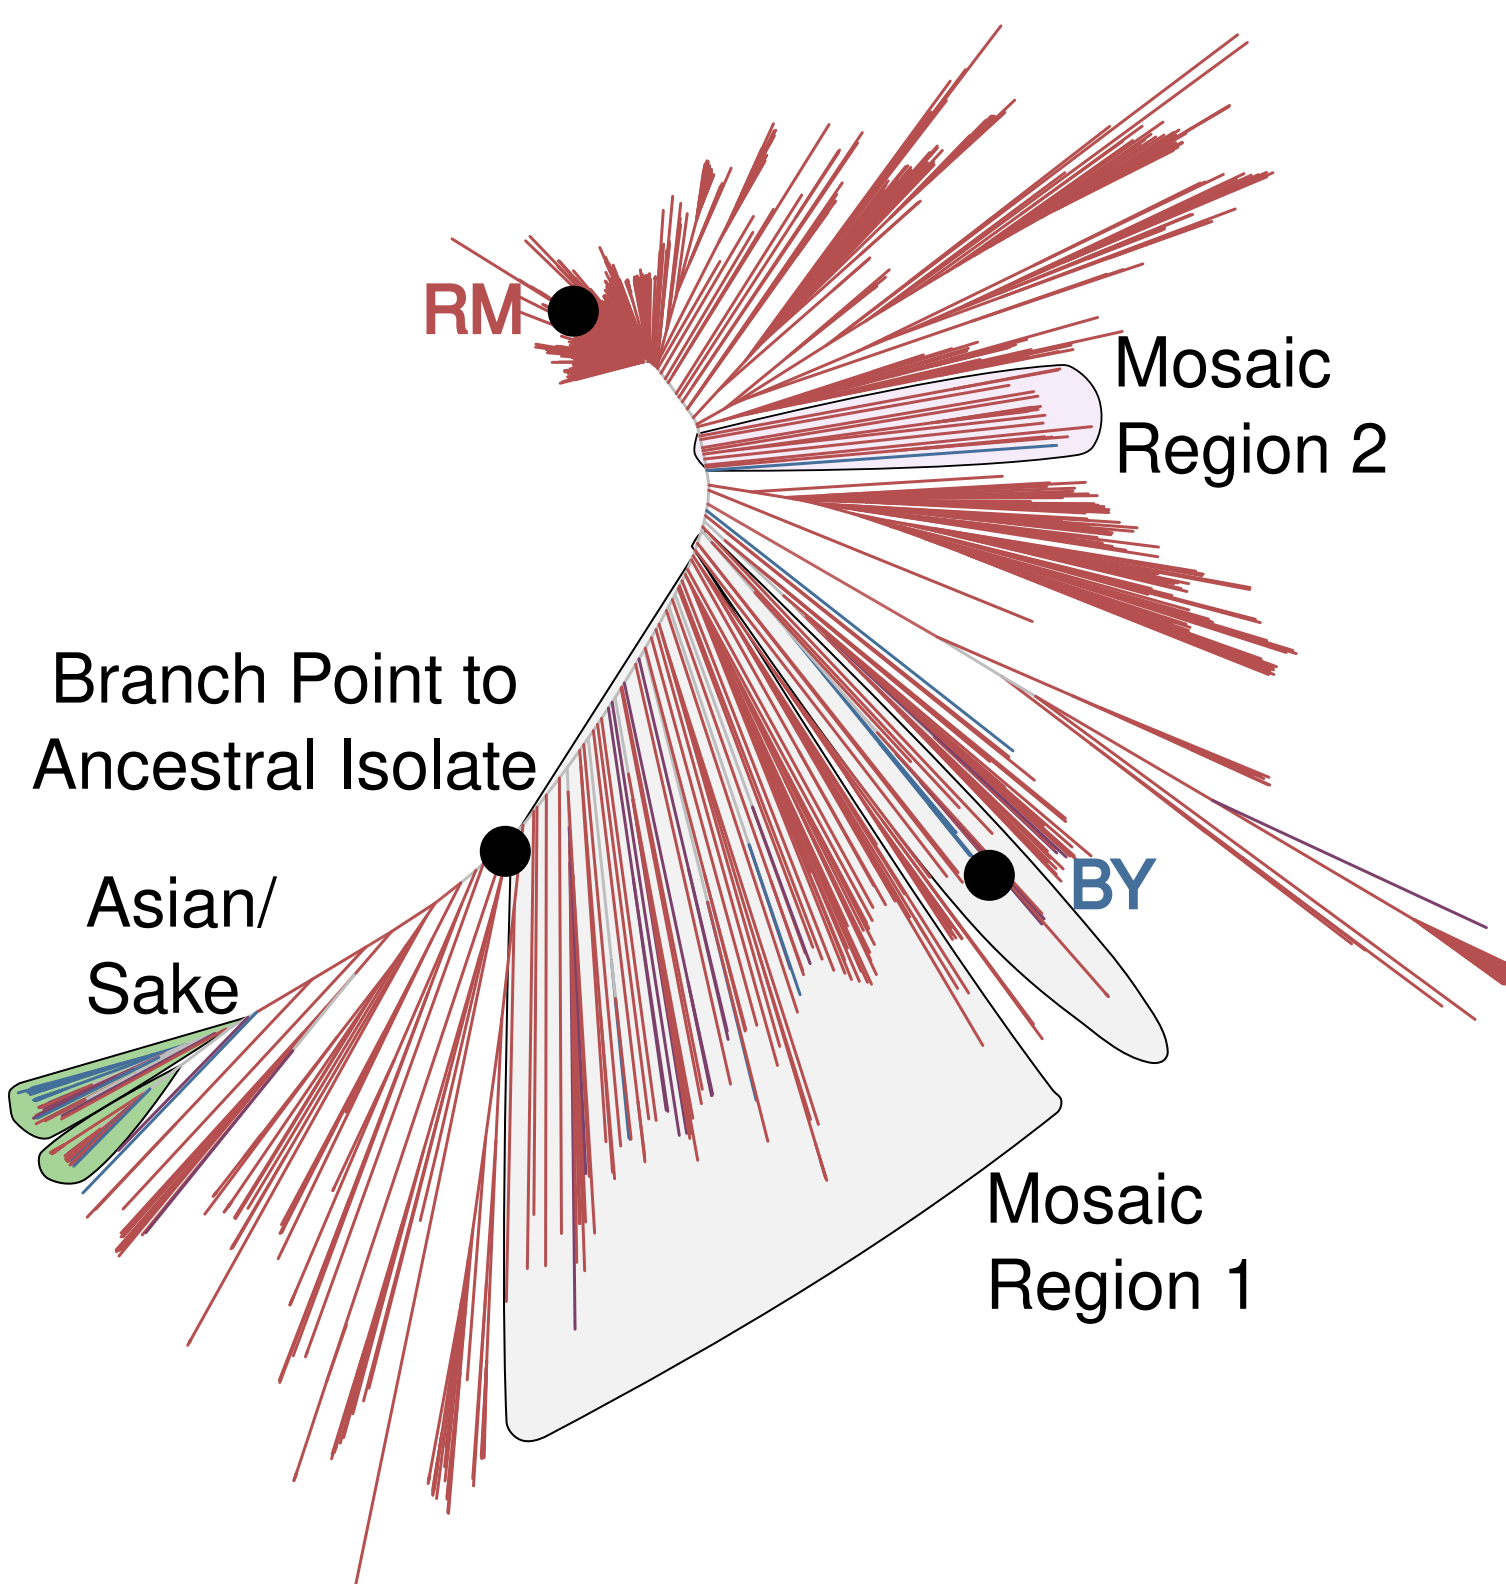

***UBC6* D229G**  
RM allele frequency = 97.8%

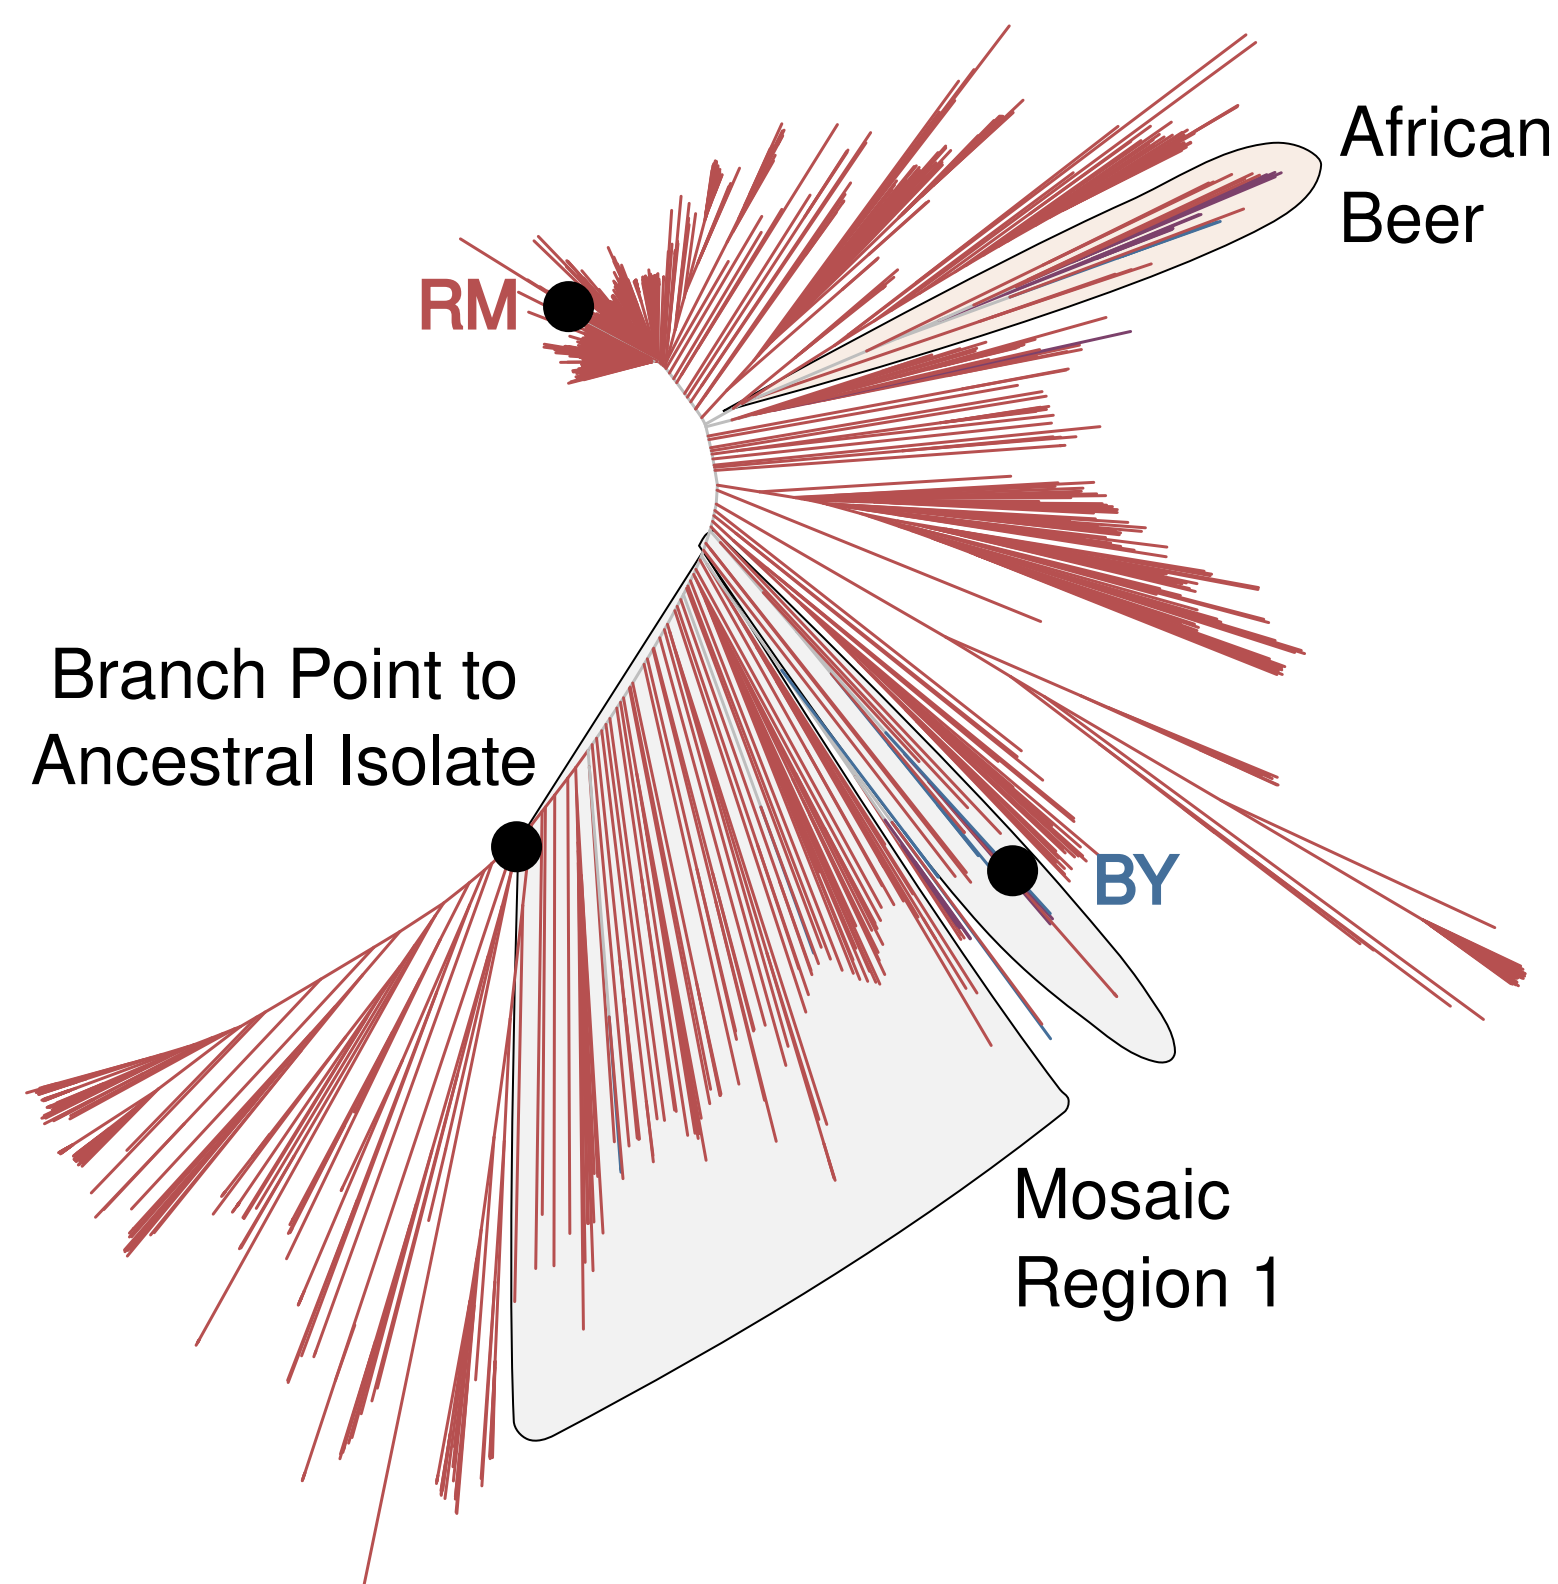

Supplement: supp [file elife_poa_e79570_Figure_3_figure_supplement_3.pdf › elife_poa_e79570_Figure_3_figure_supplement_3.pdf]
