# Supplementary material for: Variation in ubiquitin system genes creates substrate-specific effects on proteasomal protein degradation
Source: eLife journal article supplement (doi:10.7554/elife.79570), 2022-10-11
Supplement: supp [file elife_poa_e79570_Related_Manuscript_File.xlsx]

## Sheet: Description_of_Reviewer_Respons
Table	Description	Abbreviations
Reviewer Response Table 2	Shared QTL Regions and N-degrons Affected	"chr": chromosome, "CI": confidence interval, "RM_AFD": RM allele frequency difference (high - low UPS activity pools),
Reviewer Response Table 3	Variance Explained by Causal Alleles and Variants
Reviewer Response Table 4	Results of the Sign Test for Lineage-Specific Selection Applied to All BY / RM eQTLs	“LOD”: LOD score threshold for calling cis / trans eQTL pairs, "n_QTLs": number of eQTLs, "n_genes": number of genes with an eQTL, "n_pairs": number of cis / trans eQTL pairs, "reinf_BY_up": number of cis / trans eQTLs where the BY allele of the cis and trans eQTLs increases expression (reinforcing pairs), "reinf_RM_up": number of cis / trans eQTLs where the RM allele of the cis and trans eQTLs i…
Reviewer Response Table 5	Results of Gene Ontology Enrichment of All cis / trans eQTL pairs	"GOBPID": gene ontology biological process ID, "ExpCount": expected number of genes for a given GOBPID, "LOD": LOD score threshold for including a gene with a cis / trans eQTL pair
Reviewer Response Table 6	Results of the Sign Test for Lineage-Specific Selection Applied to UPS Gene BY / RM eQTLs	“LOD”: LOD score threshold for calling cis / trans eQTL pairs, "n_QTLs": number of eQTLs, "n_genes": number of genes with an eQTL, "n_pairs": number of cis / trans eQTL pairs, "reinf_BY_up": number of cis / trans eQTLs where the BY allele of the cis and trans eQTLs increases expression (reinforcing pairs), "reinf_RM_up": number of cis / trans eQTLs where the RM allele of the cis and trans eQTLs i…
Reviewer Response Table 7	Results of Binomial Enrichment Test Applied to QTLs for Individual N-degrons	"N_QTLs": Number of QTLs for the indicated N-degron, "N_RM_up": Number of QTLs where the RM allele increases UPS activity for the indicated N-degron, "N_BY_up": Number of QTLs where the BY allele increases UPS activity for the indicated N-degron

## Sheet: Reviewer_Response_Table_2
N	QTL	chr	QTL_CI_left	QTL_peak	QTL_CI_right	LOD	RM_AFD	N. N-ends Affected	N-ends Affected	Pathway-Specific (LOD 4.5)	Pathway-Specific (LOD 3.5)	Pathway-Specific (LOD 2.5)	N-degron-Specific (LOD 4.5)	N-degron-Specific (LOD 3.5)	N-degron-Specific (LOD 2.5)
1	chr_1_a	1	5021	39400	52122	45	-0.325	7	Ala, Cys, Gly, Pro, Ser, Thr, Val	Ac/N-end	Ac/N-end	Ac/N-end	no	no	no
2	chr_2_a	2	473450	515516	573934	11.1	0.13	3	Arg, Lys, Phe	Arg/N-end	Arg/N-end	no	no	no	no
3	chr_2_b	2	534970	585630	640010	8.9	0.112	5	Ala, Arg, Asp, Lys, Met	no	no	no	no	no	no
4	chr_4_a	4	29500	87662	116525	7.3	-0.108	4	Gln, Glu, Gly, His	no	no	no	no	no	no
5	chr_4_b	4	273175	327300	362600	17.5	0.152	2	Trp, Tyr	Arg/N-end	Arg/N-end	no	no	no	no
6	chr_4_c	4	376817	425550	463567	14.3	0.156	6	Ala, Phe, Pro, Ser, Thr, Trp	no	no	no	no	no	no
7	chr_4_d	4	392275	498200	557000	8.2	-0.107	2	Asn, Asp	Arg/N-end	Arg/N-end	Arg/N-end	no	no	no
8	chr_5_a	5	351400	372136	396250	37.5	0.248	7	Ala, Cys, Gly, Pro, Ser, Thr, Val	Ac/N-end	Ac/N-end	Ac/N-end	no	no	no
13	chr_7_a	7	42075	62775	103225	12.5	-0.155	2	Asn, Thr	no	no	no	no	no	no
9	chr_7_b	7	98178	132779	172279	14.3	-0.156	7	Ala, Cys, Gly, Pro, Ser, Thr, Val	Ac/N-end	no	no	no	no	no
10	chr_7_c	7	389941	418641	451318	18	0.167	11	Ala, Asn, Cys, Gly, Phe, Pro, Ser, Thr, Trp, Tyr, Val	no	no	no	no	no	no
11	chr_7_d	7	841300	869700	899934	15.2	-0.157	3	Arg, Asn, Asp	Arg/N-end	Arg/N-end	Arg/N-end	no	no	no
12	chr_7_e	7	856120	870980	883830	107.5	0.409	5	His, Leu, Phe, Trp, Tyr	Arg/N-end	Arg/N-end	Arg/N-end	no	no	no
15	chr_8_a	8	50150	98050	127300	6	-0.101	1	Tyr	Arg/N-end	Arg/N-end	Arg/N-end	Tyr	Tyr	Tyr
14	chr_8_b	8	118875	148400	193675	8.4	0.104	2	Asp, Lys	Arg/N-end	Arg/N-end	Arg/N-end	no	no	no
17	chr_9_a	9	94550	130775	168000	5.1	0.099	2	His, Lys	Arg/N-end	Arg/N-end	Arg/N-end	no	no	no
16	chr_9_b	9	267641	291492	315417	23.5	0.195	6	Ala, Gly, Pro, Ser, Thr, Val	Ac/N-end	Ac/N-end	Ac/N-end	no	no	no
18	chr_10_a	10	323900	345482	371186	21.9	0.182	11	Ala, Arg, Cys, Gln, Gly, Lys, Phe, Pro, Ser, Trp, Tyr	no	no	no	no	no	no
19	chr_10_b	10	589770	615660	641600	25.1	0.192	5	Ala, Arg, Asn, Cys, Gln	no	no	no	no	no	no
21	chr_11_a	11	118750	156450	173600	16	0.152	1	His	Arg/N-end	Arg/N-end	Arg/N-end	His	no	no
20	chr_11_b	11	291030	339790	388750	8.4	-0.106	5	Ala, Arg, Cys, Phe, Thr	no	no	no	no	no	no
22	chr_12_a	12	157200	197050	226850	8.2	0.126	2	Ala, Pro	Ac/N-end	no	no	no	no	no
23	chr_12_b	12	644414	657241	674723	42.1	-0.25	11	Ala, Cys, Gly, Met, Phe, Pro, Ser, Thr, Trp, Tyr, Val	no	no	no	no	no	no
24	chr_12_c	12	639637	674125	702650	9.7	0.108	4	Asp, Gly, His, Ile	Arg/N-end	Arg/N-end	Arg/N-end	no	no	no
25	chr_13_a	13	0	24650	58950	9.6	-0.162	1	Ala	Ac/N-end	Ac/N-end	no	Ala	no	no
27	chr_13_b	13	31800	56525	77675	14.9	0.145	2	His, Phe	Arg/N-end	Arg/N-end	Arg/N-end	no	no	no
26	chr_13_c	13	265350	296167	331584	16.5	0.17	6	Arg, Asn, Asp, Glu, His, Lys	Arg/N-end	no	no	no	no	no
29	chr_14_a	14	450731	465394	482912	89.3	-0.342	8	His, Leu, Lys, Met, Phe, Pro, Trp, Tyr	no	no	no	no	no	no
28	chr_14_b	14	449725	470850	504025	86.7	0.336	2	Asp, Thr	no	no	no	no	no	no
31	chr_15_a	15	133625	163862	184831	20.2	-0.183	8	Arg, Asn, Asp, Glu, His, Lys, Met, Phe	no	no	no	no	no	no
30	chr_15_b	15	342850	388050	431300	10.1	0.116	3	Ala, Pro, Thr	Ac/N-end	no	no	no	no	no
32	chr_15_c	15	525200	561525	591775	10.6	0.128	2	Ser, Thr	Ac/N-end	Ac/N-end	Ac/N-end	no	no	no
33	chr_15_d	15	518550	569750	594650	8.8	-0.096	1	Cys	Ac/N-end	Ac/N-end	Ac/N-end	Cys	Cys	Cys
34	chr_16_a	16	166030	194830	222070	11.6	0.121	5	Ala, Gly, Pro, Thr, Val	Ac/N-end	Ac/N-end	Ac/N-end	no	no	no
35	chr_16_b	16	375050	403350	428950	24.5	-0.22	1	Pro	Ac/N-end	Ac/N-end	Ac/N-end	Pro	Pro	Pro

## Sheet: Reviewer_Response_Table_3
Gene	Allele	N-degron	Variance Explained
DOA10	K1012N	Thr	0.04
DOA10	Q410E	Thr	0.075
DOA10	RM_full	Thr	0.911
DOA10	Y1186F	Thr	0.597
DOA10	K1012N	Gly	0.608
DOA10	Q410E	Gly	0.74
DOA10	RM_full	Gly	0.879
DOA10	Y1186F	Gly	0.77
NTA1	D111E	Asn	0.204
NTA1	E129G	Asn	0.764
NTA1	RM_full	Asn	0.789
NTA1	RM_pr	Asn	-0.014
UBC6	D229G	Ala	0.717
UBC6	RM_full	Ala	0.666
UBC6	RM_pr	Ala	-0.027
UBC6	RM_term	Ala	0.183
UBC6	D229G	Thr	0.762
UBC6	RM_full	Thr	0.928
UBC6	RM_pr	Thr	0.008
UBC6	RM_term	Thr	0.006
UBR1	RM_causal	Phe	0.9
UBR1	RM_full	Phe	0.917
UBR1	RM_non	Phe	-0.019
UBR1	RM_pr	Phe	0.818
UBR1	RM_causal	Trp	0.937
UBR1	RM_full	Trp	0.975
UBR1	RM_non	Trp	0.059
UBR1	RM_pr	Trp	0.934
UBR1	RM_full	Asn	0.438
UBR1	RM_ORF	Asn	0.134
UBR1	RM_pr	Asn	-0.012
UBR1	RM_term	Asn	0.064
UBR1	RM_full	Asp	0.403
UBR1	RM_ORF	Asp	0.101
UBR1	RM_pr	Asp	0.097
UBR1	RM_term	Asp	0.048
UBR1	RM_full	Phe	0.866
UBR1	RM_ORF	Phe	0.343
UBR1	RM_pr	Phe	0.316
UBR1	RM_term	Phe	-0.031
UBR1	RM_full	Trp	0.964
UBR1	RM_ORF	Trp	0.813
UBR1	RM_pr	Trp	0.928
UBR1	RM_term	Trp	0.028

## Sheet: Reviewer_Response_Table_4
LOD	n_QTLs	n_genes	n_no_cis	n_cis	n_pairs	n_no_pairs	reinf_by_up	oppos_by_up	oppos_rm_up	reinf_rm_up	excess_reinf	chi_sq_p
2.4	36498	5643	2759	2884	2845	39	627	952	509	757	-14	0.818
5	19694	5372	3040	2332	2081	251	449	698	357	577	19	0.701
10	9379	4514	2786	1728	1124	604	225	404	175	320	4.63	0.934
15	6125	3686	2269	1417	745	672	154	279	110	202	2.24	0.992
20	4452	3076	1884	1192	480	712	108	179	65	128	18.2	0.431
25	3458	2609	1571	1038	336	702	73	127	41	95	20.6	0.276
30	2788	2224	1328	896	230	666	54	85	26	65	22.6	0.145
35	2310	1912	1105	807	178	629	44	68	18	48	20	0.144
40	1963	1664	941	723	140	583	35	53	11	41	24.3	0.0375
45	1706	1474	825	649	110	539	28	42	7	33	22.9	0.0261
50	1475	1299	716	583	85	498	21	31	6	27	17.9	0.0569

## Sheet: Reviewer_Response_Table_5
GOBPID	Pvalue	OddsRatio	ExpCount	Count	Size	Term	category	LOD
GO:0032197	2.8e-05	3	15.06	30	61	transposition; RNA-mediated	all_reinforcing	2.42661
GO:0015074	0.00046	3.1	9.87	20	40	DNA integration	all_reinforcing	2.42661
GO:0006487	0.00077	2.7	11.6	22	47	protein N-linked glycosylation	all_reinforcing	2.42661
GO:0046513	0.0012	10.7	2.22	7	9	ceramide biosynthetic process	all_reinforcing	2.42661
GO:0006458	0.0029	3.3	6.17	13	25	'de novo' protein folding	all_reinforcing	2.42661
GO:0018904	0.0037	Inf	0.99	4	4	ether metabolic process	all_reinforcing	2.42661
GO:0051131	0.0039	9.2	1.97	6	8	chaperone-mediated protein complex assembly	all_reinforcing	2.42661
GO:1901135	0.0045	1.4	92.08	114	373	carbohydrate derivative metabolic process	all_reinforcing	2.42661
GO:0070085	0.0063	1.8	21.23	32	86	glycosylation	all_reinforcing	2.42661
GO:0061077	0.0068	3.9	3.95	9	16	chaperone-mediated protein folding	all_reinforcing	2.42661
GO:0006672	0.007	5.4	2.72	7	11	ceramide metabolic process	all_reinforcing	2.42661
GO:0009101	0.007	1.8	19.75	30	80	glycoprotein biosynthetic process	all_reinforcing	2.42661
GO:0016226	0.0089	3.1	5.43	11	22	iron-sulfur cluster assembly	all_reinforcing	2.42661
GO:0031070	0.0093	6.1	2.22	6	9	intronic snoRNA processing	all_reinforcing	2.42661
GO:0034965	0.0093	6.1	2.22	6	9	intronic box C/D snoRNA processing	all_reinforcing	2.42661
GO:0032197	2.8e-05	3	15.06	30	61	transposition; RNA-mediated	all_reinforcing	2.42661
GO:0015074	0.00046	3.1	9.87	20	40	DNA integration	all_reinforcing	2.42661
GO:0006487	0.00077	2.7	11.6	22	47	protein N-linked glycosylation	all_reinforcing	2.42661
GO:0046513	0.0012	10.7	2.22	7	9	ceramide biosynthetic process	all_reinforcing	2.42661
GO:0006458	0.0029	3.3	6.17	13	25	'de novo' protein folding	all_reinforcing	2.42661
GO:0018904	0.0037	Inf	0.99	4	4	ether metabolic process	all_reinforcing	2.42661
GO:0051131	0.0039	9.2	1.97	6	8	chaperone-mediated protein complex assembly	all_reinforcing	2.42661
GO:1901135	0.0045	1.4	92.08	114	373	carbohydrate derivative metabolic process	all_reinforcing	2.42661
GO:0070085	0.0063	1.8	21.23	32	86	glycosylation	all_reinforcing	2.42661
GO:0061077	0.0068	3.9	3.95	9	16	chaperone-mediated protein folding	all_reinforcing	2.42661
GO:0006672	0.007	5.4	2.72	7	11	ceramide metabolic process	all_reinforcing	2.42661
GO:0009101	0.007	1.8	19.75	30	80	glycoprotein biosynthetic process	all_reinforcing	2.42661
GO:0016226	0.0089	3.1	5.43	11	22	iron-sulfur cluster assembly	all_reinforcing	2.42661
GO:0031070	0.0093	6.1	2.22	6	9	intronic snoRNA processing	all_reinforcing	2.42661
GO:0034965	0.0093	6.1	2.22	6	9	intronic box C/D snoRNA processing	all_reinforcing	2.42661
GO:0032197	4e-06	3.5	11.51	27	60	transposition; RNA-mediated	all_reinforcing	5
GO:0015074	0.00011	3.7	7.48	18	39	DNA integration	all_reinforcing	5
GO:0006458	0.001	3.9	4.79	12	25	'de novo' protein folding	all_reinforcing	5
GO:0061077	0.0011	5.5	3.07	9	16	chaperone-mediated protein folding	all_reinforcing	5
GO:0006487	0.0013	2.7	8.82	18	46	protein N-linked glycosylation	all_reinforcing	5
GO:0018904	0.0013	Inf	0.77	4	4	ether metabolic process	all_reinforcing	5
GO:0046513	0.0024	8.5	1.73	6	9	ceramide biosynthetic process	all_reinforcing	5
GO:0070525	0.0024	8.5	1.73	6	9	tRNA threonylcarbamoyladenosine metabolic process	all_reinforcing	5
GO:0051131	0.0038	10.6	1.34	5	7	chaperone-mediated protein complex assembly	all_reinforcing	5
GO:0032259	0.0045	1.8	21.29	33	111	methylation	all_reinforcing	5
GO:0046165	0.0052	2.2	11.32	20	59	alcohol biosynthetic process	all_reinforcing	5
GO:0044281	0.0063	1.3	150.75	177	786	small molecule metabolic process	all_reinforcing	5
GO:0006662	0.007	Inf	0.58	3	3	glycerol ether metabolic process	all_reinforcing	5
GO:0002949	0.007	Inf	0.58	3	3	tRNA threonylcarbamoyladenosine modification	all_reinforcing	5
GO:0033215	0.007	Inf	0.58	3	3	iron assimilation by reduction and transport	all_reinforcing	5
GO:0046131	0.0083	3.8	3.26	8	17	pyrimidine ribonucleoside metabolic process	all_reinforcing	5
GO:0019509	0.0086	7.1	1.53	5	8	L-methionine salvage from methylthioadenosine	all_reinforcing	5
GO:0006694	0.0086	2.4	8.06	15	42	steroid biosynthetic process	all_reinforcing	5
GO:0006696	0.0089	2.7	5.95	12	31	ergosterol biosynthetic process	all_reinforcing	5
GO:0006672	0.0094	5.1	2.11	6	11	ceramide metabolic process	all_reinforcing	5
GO:0019856	0.0094	5.1	2.11	6	11	pyrimidine nucleobase biosynthetic process	all_reinforcing	5
GO:1902652	0.0098	2.5	6.71	13	35	secondary alcohol metabolic process	all_reinforcing	5
GO:0032197	1.5e-06	4.5	6.44	20	53	transposition; RNA-mediated	all_reinforcing	10
GO:0015074	7.7e-05	4.3	4.62	14	38	DNA integration	all_reinforcing	10
GO:0018904	0.00022	Inf	0.49	4	4	ether metabolic process	all_reinforcing	10
GO:0006662	0.0018	Inf	0.36	3	3	glycerol ether metabolic process	all_reinforcing	10
GO:0006278	0.0021	2.7	6.8	15	56	RNA-dependent DNA biosynthetic process	all_reinforcing	10
GO:1902047	0.0022	9.1	1.09	5	9	polyamine transmembrane transport	all_reinforcing	10
GO:0046165	0.0041	2.6	6.56	14	54	alcohol biosynthetic process	all_reinforcing	10
GO:0043605	0.0056	9.7	0.85	4	7	cellular amide catabolic process	all_reinforcing	10
GO:0019509	0.0056	9.7	0.85	4	7	L-methionine salvage from methylthioadenosine	all_reinforcing	10
GO:0072488	0.006	4.9	1.82	6	15	ammonium transmembrane transport	all_reinforcing	10
GO:0015846	0.0064	6.1	1.34	5	11	polyamine transport	all_reinforcing	10
GO:0006833	0.0065	21.8	0.49	3	4	water transport	all_reinforcing	10
GO:0042044	0.0065	21.8	0.49	3	4	fluid transport	all_reinforcing	10
GO:1902652	0.007	2.9	4.25	10	35	secondary alcohol metabolic process	all_reinforcing	10
GO:0002098	0.007	3.9	2.43	7	20	tRNA wobble uridine modification	all_reinforcing	10
GO:0006400	0.008	2.3	7.05	14	58	tRNA modification	all_reinforcing	10
GO:0009067	0.0086	2.5	5.71	12	47	aspartate family amino acid biosynthetic process	all_reinforcing	10
GO:0006696	0.0092	3	3.77	9	31	ergosterol biosynthetic process	all_reinforcing	10
GO:0006694	0.0096	2.6	5.1	11	42	steroid biosynthetic process	all_reinforcing	10
GO:0034220	0.0096	1.6	25.27	37	208	ion transmembrane transport	all_reinforcing	10
GO:0032259	0.01	1.9	11.66	20	96	methylation	all_reinforcing	10
GO:0015074	3.3e-05	5	3.71	13	38	DNA integration	all_reinforcing	15
GO:0032197	6.2e-05	4	4.98	15	51	transposition; RNA-mediated	all_reinforcing	15
GO:0046165	9.3e-05	4	4.59	14	47	alcohol biosynthetic process	all_reinforcing	15
GO:0006278	0.00031	3.5	5.07	14	52	RNA-dependent DNA biosynthetic process	all_reinforcing	15
GO:1902652	0.0011	3.9	3.32	10	34	secondary alcohol metabolic process	all_reinforcing	15
GO:0019509	0.0011	18.7	0.59	4	6	L-methionine salvage from methylthioadenosine	all_reinforcing	15
GO:0070525	0.0011	18.7	0.59	4	6	tRNA threonylcarbamoyladenosine metabolic process	all_reinforcing	15
GO:0006696	0.0016	4	2.93	9	30	ergosterol biosynthetic process	all_reinforcing	15
GO:0009086	0.0016	4	2.93	9	30	methionine biosynthetic process	all_reinforcing	15
GO:0071267	0.0025	12.5	0.68	4	7	L-methionine salvage	all_reinforcing	15
GO:0043102	0.0025	12.5	0.68	4	7	amino acid salvage	all_reinforcing	15
GO:0043605	0.0025	12.5	0.68	4	7	cellular amide catabolic process	all_reinforcing	15
GO:0016128	0.0033	3.5	3.22	9	33	phytosteroid metabolic process	all_reinforcing	15
GO:0006811	0.0034	1.7	27.81	42	285	ion transport	all_reinforcing	15
GO:0070900	0.0034	28	0.39	3	4	mitochondrial tRNA modification	all_reinforcing	15
GO:1900864	0.0034	28	0.39	3	4	mitochondrial RNA modification	all_reinforcing	15
GO:0006694	0.0049	3	4	10	41	steroid biosynthetic process	all_reinforcing	15
GO:0009066	0.005	2.6	5.95	13	61	aspartate family amino acid metabolic process	all_reinforcing	15
GO:0044107	0.0051	3.3	3.42	9	35	cellular alcohol metabolic process	all_reinforcing	15
GO:0016125	0.0063	2.7	4.78	11	49	sterol metabolic process	all_reinforcing	15
GO:1902047	0.0075	7.5	0.88	4	9	polyamine transmembrane transport	all_reinforcing	15
GO:0006531	0.0079	14	0.49	3	5	aspartate metabolic process	all_reinforcing	15
GO:0090646	0.0079	14	0.49	3	5	mitochondrial tRNA processing	all_reinforcing	15
GO:0015804	0.0082	5.2	1.37	5	14	neutral amino acid transport	all_reinforcing	15
GO:0016226	0.0082	5.2	1.37	5	14	iron-sulfur cluster assembly	all_reinforcing	15
GO:0098655	0.0093	1.9	12.29	21	126	cation transmembrane transport	all_reinforcing	15
GO:0015840	0.0095	Inf	0.2	2	2	urea transport	all_reinforcing	15
GO:0034311	0.0095	Inf	0.2	2	2	diol metabolic process	all_reinforcing	15
GO:0034312	0.0095	Inf	0.2	2	2	diol biosynthetic process	all_reinforcing	15
GO:0019755	0.0095	Inf	0.2	2	2	one-carbon compound transport	all_reinforcing	15
GO:0042883	0.0095	Inf	0.2	2	2	cysteine transport	all_reinforcing	15
GO:0090502	0.0096	2.2	7.12	14	73	RNA phosphodiester bond hydrolysis; endonucleolytic	all_reinforcing	15
GO:0015074	1.8e-06	6.8	2.87	13	37	DNA integration	all_reinforcing	20
GO:0032197	2.8e-06	5.4	3.88	15	50	transposition; RNA-mediated	all_reinforcing	20
GO:0006278	4.4e-05	4.6	3.73	13	48	RNA-dependent DNA biosynthetic process	all_reinforcing	20
GO:0070525	0.00047	24.2	0.47	4	6	tRNA threonylcarbamoyladenosine metabolic process	all_reinforcing	20
GO:0090502	0.0006	3.3	4.73	13	61	RNA phosphodiester bond hydrolysis; endonucleolytic	all_reinforcing	20
GO:0034654	0.0017	1.6	41.44	59	534	nucleobase-containing compound biosynthetic process	all_reinforcing	20
GO:0006551	0.0017	36.1	0.31	3	4	leucine metabolic process	all_reinforcing	20
GO:0070900	0.0017	36.1	0.31	3	4	mitochondrial tRNA modification	all_reinforcing	20
GO:1900864	0.0017	36.1	0.31	3	4	mitochondrial RNA modification	all_reinforcing	20
GO:0015804	0.0021	7.6	1.01	5	13	neutral amino acid transport	all_reinforcing	20
GO:0016226	0.0021	7.6	1.01	5	13	iron-sulfur cluster assembly	all_reinforcing	20
GO:0001302	0.0029	3.9	2.56	8	33	replicative cell aging	all_reinforcing	20
GO:0044249	0.0039	1.5	91.27	111	1176	cellular biosynthetic process	all_reinforcing	20
GO:1901576	0.004	1.5	92.28	112	1189	organic substance biosynthetic process	all_reinforcing	20
GO:0090646	0.0041	18	0.39	3	5	mitochondrial tRNA processing	all_reinforcing	20
GO:0009083	0.0041	18	0.39	3	5	branched-chain amino acid catabolic process	all_reinforcing	20
GO:0006310	0.005	2.2	8.69	17	112	DNA recombination	all_reinforcing	20
GO:0015840	0.006	Inf	0.16	2	2	urea transport	all_reinforcing	20
GO:0019755	0.006	Inf	0.16	2	2	one-carbon compound transport	all_reinforcing	20
GO:0042883	0.006	Inf	0.16	2	2	cysteine transport	all_reinforcing	20
GO:0043605	0.0077	12	0.47	3	6	cellular amide catabolic process	all_reinforcing	20
GO:0019509	0.0077	12	0.47	3	6	L-methionine salvage from methylthioadenosine	all_reinforcing	20
GO:0070880	0.0077	12	0.47	3	6	fungal-type cell wall beta-glucan biosynthetic process	all_reinforcing	20
GO:0070879	0.0077	12	0.47	3	6	fungal-type cell wall beta-glucan metabolic process	all_reinforcing	20
GO:0044283	0.0098	1.7	21.19	32	273	small molecule biosynthetic process	all_reinforcing	20
GO:0015074	1.7e-06	7.4	2.4	12	37	DNA integration	all_reinforcing	25
GO:0006278	1.7e-05	5.6	2.92	12	45	RNA-dependent DNA biosynthetic process	all_reinforcing	25
GO:0032197	2.7e-05	5.2	3.05	12	47	transposition; RNA-mediated	all_reinforcing	25
GO:0090502	9.7e-05	4.5	3.44	12	53	RNA phosphodiester bond hydrolysis; endonucleolytic	all_reinforcing	25
GO:0034654	0.0014	1.8	29.54	45	455	nucleobase-containing compound biosynthetic process	all_reinforcing	25
GO:0001302	0.002	4.7	1.88	7	29	replicative cell aging	all_reinforcing	25
GO:0044249	0.003	1.6	64.61	82	995	cellular biosynthetic process	all_reinforcing	25
GO:0015804	0.0039	8.4	0.71	4	11	neutral amino acid transport	all_reinforcing	25
GO:0006310	0.004	2.5	6.43	14	99	DNA recombination	all_reinforcing	25
GO:1901576	0.004	1.6	65.19	82	1004	organic substance biosynthetic process	all_reinforcing	25
GO:0015840	0.0042	Inf	0.13	2	2	urea transport	all_reinforcing	25
GO:0019755	0.0042	Inf	0.13	2	2	one-carbon compound transport	all_reinforcing	25
GO:0070525	0.0046	14.6	0.39	3	6	tRNA threonylcarbamoyladenosine metabolic process	all_reinforcing	25
GO:0007568	0.0063	3.3	2.86	8	44	aging	all_reinforcing	25
GO:0090305	0.0087	2.3	6.3	13	97	nucleic acid phosphodiester bond hydrolysis	all_reinforcing	25
GO:0006696	0.0093	3.9	1.88	6	29	ergosterol biosynthetic process	all_reinforcing	25
GO:0015074	2e-07	9.3	1.99	12	37	DNA integration	all_reinforcing	30
GO:0006278	1.6e-06	7.2	2.37	12	44	RNA-dependent DNA biosynthetic process	all_reinforcing	30
GO:0032197	3.5e-06	6.6	2.53	12	47	transposition; RNA-mediated	all_reinforcing	30
GO:0090502	4.5e-06	6.4	2.58	12	48	RNA phosphodiester bond hydrolysis; endonucleolytic	all_reinforcing	30
GO:0006310	0.00028	3.4	4.95	14	92	DNA recombination	all_reinforcing	30
GO:0090305	0.0019	3	4.68	12	87	nucleic acid phosphodiester bond hydrolysis	all_reinforcing	30
GO:1902047	0.0045	13.5	0.38	3	7	polyamine transmembrane transport	all_reinforcing	30
GO:0044249	0.0046	1.7	45	59	837	cellular biosynthetic process	all_reinforcing	30
GO:0034654	0.0047	1.8	20.59	32	383	nucleobase-containing compound biosynthetic process	all_reinforcing	30
GO:1901576	0.0059	1.6	45.43	59	845	organic substance biosynthetic process	all_reinforcing	30
GO:0015846	0.007	10.8	0.43	3	8	polyamine transport	all_reinforcing	30
GO:1903008	0.0092	4.6	1.34	5	25	organelle disassembly	all_reinforcing	30
GO:0015074	3.7e-08	11.2	1.74	12	36	DNA integration	all_reinforcing	35
GO:0032197	4.5e-07	8.4	2.12	12	44	transposition; RNA-mediated	all_reinforcing	35
GO:0006278	4.5e-07	8.4	2.12	12	44	RNA-dependent DNA biosynthetic process	all_reinforcing	35
GO:0090502	5.9e-07	8.1	2.17	12	45	RNA phosphodiester bond hydrolysis; endonucleolytic	all_reinforcing	35
GO:0006310	0.00012	4	4.05	13	84	DNA recombination	all_reinforcing	35
GO:0090305	0.00021	4	3.71	12	77	nucleic acid phosphodiester bond hydrolysis	all_reinforcing	35
GO:0044249	0.00062	2.1	34.67	50	719	cellular biosynthetic process	all_reinforcing	35
GO:0034654	0.00077	2.3	15.62	28	324	nucleobase-containing compound biosynthetic process	all_reinforcing	35
GO:1901576	0.0008	2	35.01	50	726	organic substance biosynthetic process	all_reinforcing	35
GO:1902047	0.0033	15.3	0.34	3	7	polyamine transmembrane transport	all_reinforcing	35
GO:0015846	0.0051	12.2	0.39	3	8	polyamine transport	all_reinforcing	35
GO:0043457	0.0067	40.3	0.14	2	3	regulation of cellular respiration	all_reinforcing	35
GO:0006696	0.0095	4.5	1.35	5	28	ergosterol biosynthetic process	all_reinforcing	35
GO:0015074	1.8e-08	12.2	1.64	12	36	DNA integration	all_reinforcing	40
GO:0090502	1.7e-07	9.4	1.96	12	43	RNA phosphodiester bond hydrolysis; endonucleolytic	all_reinforcing	40
GO:0032197	2.2e-07	9.1	2.01	12	44	transposition; RNA-mediated	all_reinforcing	40
GO:0006278	2.2e-07	9.1	2.01	12	44	RNA-dependent DNA biosynthetic process	all_reinforcing	40
GO:0006310	3.1e-05	4.8	3.61	13	79	DNA recombination	all_reinforcing	40
GO:0090305	6.7e-05	4.7	3.33	12	73	nucleic acid phosphodiester bond hydrolysis	all_reinforcing	40
GO:0015846	0.0017	21.7	0.27	3	6	polyamine transport	all_reinforcing	40
GO:1902047	0.0017	21.7	0.27	3	6	polyamine transmembrane transport	all_reinforcing	40
GO:0044249	0.0027	2	28.87	41	632	cellular biosynthetic process	all_reinforcing	40
GO:0034654	0.0053	2.1	12.88	22	282	nucleobase-containing compound biosynthetic process	all_reinforcing	40
GO:0008610	0.0063	3.1	3.47	9	76	lipid biosynthetic process	all_reinforcing	40
GO:0006696	0.0064	5	1.23	5	27	ergosterol biosynthetic process	all_reinforcing	40
GO:0015804	0.0087	9.3	0.46	3	10	neutral amino acid transport	all_reinforcing	40
GO:0015074	6.3e-08	12.3	1.5	11	36	DNA integration	all_reinforcing	45
GO:0090502	3.7e-07	9.9	1.7	11	42	RNA phosphodiester bond hydrolysis; endonucleolytic	all_reinforcing	45
GO:0006278	3.7e-07	9.9	1.7	11	42	RNA-dependent DNA biosynthetic process	all_reinforcing	45
GO:0032197	6.3e-07	9.3	1.8	11	44	transposition; RNA-mediated	all_reinforcing	45
GO:0006310	2.8e-05	5.3	3.1	12	75	DNA recombination	all_reinforcing	45
GO:0090305	7.6e-05	5.1	2.9	11	70	nucleic acid phosphodiester bond hydrolysis	all_reinforcing	45
GO:0044249	0.00039	2.5	22.9	36	555	cellular biosynthetic process	all_reinforcing	45
GO:1901576	0.0005	2.5	23.2	36	561	organic substance biosynthetic process	all_reinforcing	45
GO:1901360	0.0018	2.2	20.7	32	502	organic cyclic compound metabolic process	all_reinforcing	45
GO:0034654	0.0024	2.4	10	19	241	nucleobase-containing compound biosynthetic process	all_reinforcing	45
GO:0006696	0.0029	6.2	1	5	25	ergosterol biosynthetic process	all_reinforcing	45
GO:0016128	0.0048	5.4	1.2	5	28	phytosteroid metabolic process	all_reinforcing	45
GO:0044107	0.0056	5.2	1.2	5	29	cellular alcohol metabolic process	all_reinforcing	45
GO:1902652	0.0056	5.2	1.2	5	29	secondary alcohol metabolic process	all_reinforcing	45
GO:0055114	0.0075	2.4	7.1	14	171	oxidation-reduction process	all_reinforcing	45
GO:0006694	0.0075	4.8	1.3	5	31	steroid biosynthetic process	all_reinforcing	45
GO:0046165	0.0087	4.6	1.3	5	32	alcohol biosynthetic process	all_reinforcing	45
GO:0006644	0.0099	4.4	1.4	5	33	phospholipid metabolic process	all_reinforcing	45
GO:0015074	2.5e-05	8.8	1.32	8	36	DNA integration	all_reinforcing	50
GO:0006278	5.6e-05	7.7	1.47	8	40	RNA-dependent DNA biosynthetic process	all_reinforcing	50
GO:0090502	6.8e-05	7.5	1.5	8	41	RNA phosphodiester bond hydrolysis; endonucleolytic	all_reinforcing	50
GO:0032197	0.00012	6.8	1.61	8	44	transposition; RNA-mediated	all_reinforcing	50
GO:0006310	0.00052	4.7	2.49	9	68	DNA recombination	all_reinforcing	50
GO:0006696	0.0011	8.1	0.84	5	23	ergosterol biosynthetic process	all_reinforcing	50
GO:0016128	0.002	6.9	0.95	5	26	phytosteroid metabolic process	all_reinforcing	50
GO:0090305	0.002	4.2	2.42	8	66	nucleic acid phosphodiester bond hydrolysis	all_reinforcing	50
GO:0044107	0.0023	6.6	0.99	5	27	cellular alcohol metabolic process	all_reinforcing	50
GO:1902652	0.0023	6.6	0.99	5	27	secondary alcohol metabolic process	all_reinforcing	50
GO:0006694	0.0033	6	1.06	5	29	steroid biosynthetic process	all_reinforcing	50
GO:0046165	0.0038	5.8	1.1	5	30	alcohol biosynthetic process	all_reinforcing	50
GO:0016125	0.0075	4.8	1.28	5	35	sterol metabolic process	all_reinforcing	50
GO:1901362	0.0094	2.4	8.21	15	245	organic cyclic compound biosynthetic process	all_reinforcing	50

## Sheet: Reviewer_Response_Table_6
LOD	n_QTLs	n_genes	n_no_cis	n_cis	n_pairs	n_no_pairs	reinf_by_up	oppos_by_up	oppos_rm_up	reinf_rm_up	excess_reinf	chi_sq_p	gene_set
2.4	1128	186	91	95	95	0	16	29	20	30	-4.21	0.815	all_UPS_genes
5	587	176	98	78	72	6	13	23	13	23	0	1	all_UPS_genes
10	250	142	85	57	29	28	2	8	7	12	-4.41	0.428	all_UPS_genes
15	162	105	58	47	19	28	1	7	3	8	-2.74	0.619	all_UPS_genes
20	115	85	45	40	10	30	0	4	2	4	-3.2	0.472	all_UPS_genes
25	90	72	34	38	8	30	0	3	2	3	-3	0.475	all_UPS_genes
30	63	56	23	33	5	28	0	2	1	2	-1.6	1	all_UPS_genes
35	52	47	16	31	4	27	0	2	1	1	-2	1	all_UPS_genes
40	37	34	8	26	3	23	0	2	0	1	0	NaN	all_UPS_genes
45	32	30	7	23	2	21	0	1	0	1	0	NaN	all_UPS_genes
2.4	242	33	19	14	14	0	3	2	6	3	-0.857	1	proteasome_genes
5	146	32	20	12	12	0	3	2	5	2	-1.33	1	proteasome_genes
10	62	30	23	7	4	3	0	0	4	0	0	NaN	proteasome_genes
15	32	19	14	5	2	3	0	0	2	0	0	NaN	proteasome_genes
20	18	14	11	3	1	2	0	0	1	0	0	NaN	proteasome_genes
25	11	9	6	3	1	2	0	0	1	0	0	NaN	proteasome_genes
2.4	829	145	69	76	76	0	13	25	15	23	-4	0.812	ubiquitin_system_genes
5	410	137	74	63	57	6	10	20	9	18	0	1	ubiquitin_system_genes
10	173	105	58	47	24	23	2	7	4	11	-1	1	ubiquitin_system_genes
15	118	80	40	40	17	23	1	7	2	7	-1.65	1	ubiquitin_system_genes
20	88	65	31	34	8	26	0	4	1	3	-2	1	ubiquitin_system_genes
25	73	58	26	32	6	26	0	3	1	2	-2	1	ubiquitin_system_genes
30	54	48	20	28	4	24	0	2	1	1	-2	1	ubiquitin_system_genes
35	44	40	14	26	3	23	0	2	1	0	-2.67	0.324	ubiquitin_system_genes
40	31	29	8	21	2	19	0	2	0	0	0	NaN	ubiquitin_system_genes
45	26	25	7	18	1	17	0	1	0	0	0	NaN	ubiquitin_system_genes
2.4	618	111	55	56	56	0	11	19	10	16	-1	1	E3_ligase_genes
5	300	103	58	45	39	6	8	14	5	12	2.67	0.909	E3_ligase_genes
10	129	79	47	32	15	17	2	4	2	7	1.6	1	E3_ligase_genes
15	83	56	30	26	9	17	1	4	0	4	1.78	1	E3_ligase_genes
20	64	46	23	23	5	18	0	3	0	2	0	NaN	E3_ligase_genes
25	49	39	18	21	3	18	0	2	0	1	0	NaN	E3_ligase_genes
30	37	33	13	20	3	17	0	2	0	1	0	NaN	E3_ligase_genes
35	30	28	9	19	2	17	0	2	0	0	0	NaN	E3_ligase_genes
40	22	20	5	15	2	13	0	2	0	0	0	NaN	E3_ligase_genes
45	18	17	4	13	1	12	0	1	0	0	0	NaN	E3_ligase_genes
2.4	57	9	3	6	6	0	0	2	0	4	0	NaN	proteasome_chaperone_genes
5	31	8	4	4	4	0	0	1	0	3	0	NaN	proteasome_chaperone_genes
10	15	8	4	4	2	2	0	1	0	1	0	NaN	proteasome_chaperone_genes
15	12	7	4	3	1	2	0	0	0	1	0	NaN	proteasome_chaperone_genes
20	9	6	3	3	1	2	0	0	0	1	0	NaN	proteasome_chaperone_genes
25	6	5	2	3	1	2	0	0	0	1	0	NaN	proteasome_chaperone_genes
30	5	4	1	3	1	2	0	0	0	1	0	NaN	proteasome_chaperone_genes
35	4	3	0	3	1	2	0	0	0	1	0	NaN	proteasome_chaperone_genes
40	4	3	0	3	1	2	0	0	0	1	0	NaN	proteasome_chaperone_genes
45	4	3	0	3	1	2	0	0	0	1	0	NaN	proteasome_chaperone_genes

## Sheet: Reviewer_Response_Table_7
Reporter	N_QTLs	N_RM_up	N_BY_up	p_value
Ala_TFT	15	10	5	0.301758
Arg_TFT	7	4	3	1
Asn_TFT	7	3	4	1
Asp_TFT	8	5	3	0.726562
Cys_TFT	9	4	5	1
Gln_TFT	3	2	1	1
Glu_TFT	4	2	2	1
Gly_TFT	9	5	4	1
His_TFT	9	6	3	0.507812
Ile_TFT	1	1	0	1
Leu_TFT	2	1	1	1
Lys_TFT	7	5	2	0.453125
Met_TFT	4	1	3	0.625
Phe_TFT	10	6	4	0.753906
Pro_TFT	13	8	5	0.581055
Ser_TFT	9	6	3	0.507812
Thr_TFT	12	8	4	0.387695
Trp_TFT	6	4	2	0.6875
Tyr_TFT	7	4	3	1
Val_TFT	7	4	3	1
