# Supplementary material for: Variation in ubiquitin system genes creates substrate-specific effects on proteasomal protein degradation
Source: eLife. 2022 Oct 11;11:e79570. doi: 10.7554/eLife.79570 (PMC9634822; doi:10.7554/eLife.79570)
Supplement: Supplementary file 3. — Table listing oligonucleotides used in this study. [file elife-79570-supp3.xlsx]

## Sheet: Sheet1
Name	Nucleotide Sequence (5'-3')	Use
OFA0071	agtttatcattatcaatactcgc	cloning
OFA0072	cccttccttctgctctatccgtcgaaactaagttc	cloning
OFA0075	caatgtgtaggacaataaaaagattcttgttttcaagaacttg	cloning
OFA0076	cagggtaccgcgaattcc	cloning
OFA0183	ctcgttcccagaaacatacg	Sanger sequencing
OFA0184	tttgagtactatcgctggcc	Sanger sequencing
OFA0209	tcgtaggtgtctgggtgaac	Sanger sequencing
OFA0210	cgacatccccgactacttga	Sanger sequencing
OFA0211	tcctgcgagaagatcatccc	Sanger sequencing
OFA0212	gaggccgcgattaaattcca	Sanger sequencing
OFA0223	gtacaccgctacacgtattgaa	colony PCR
OFA0224	ggtcttctggtaattcctgcat	colony PCR
OFA0225	catttactccaggcaggttgc	colony PCR
OFA0230	tctagcagggtccagggatc	colony PCR
OFA0231	atttgggaagacgacgagcc	colony PCR
OFA0232	tcgcctcgacatcatctgc	colony PCR
OFA0247	aagcttcgtacgctgcaggtcgacgCACCTGGGTCCTTTTCATCACG	cloning
OFA0248	gacgtcgacctgcGACAAGCTGTGACCGTCTCC	cloning
OFA0293	aagcccgggatgagcagcctaacccacacggataattttttatcgttcaaggaggaggatCTTCGTACGCTGCAGGTCGA	RPN4 gene deletion
OFA0294	ttccaaatggtatccccttagtcgttgaattagataagaataatggtcttaagtttatcagGGCGGCGTTAGTATCGAATCG	RPN4 gene deletion
OFA0488	acaagatacgaggatggtgg	Sanger sequencing
OFA0489	ggttatgtgcaggagagaac	Sanger sequencing
OFA0490	gaaacatggcaaaggtagcg	Sanger sequencing
OFA0491	acatacgatttaggtgacac	Sanger sequencing
OFA0531	gcagggaaaactcacatcgg	colony PCR
OFA0532	ccaccttgcaatgacccatg	colony PCR
OFA0533	gtgcccctgttctctgtagt	colony PCR
OFA0656	catcttgtgctaaggctaagaggtggtCAAcataaatctggtgcttggttgttgccagtt	cloning
OFA0657	catcttgtgctaaggctaagaggtggtAACcataaatctggtgcttggttgttgccagtt	cloning
OFA0658	catcttgtgctaaggctaagaggtggtGAAcataaatctggtgcttggttgttgccagtt	cloning
OFA0659	catcttgtgctaaggctaagaggtggtGACcataaatctggtgcttggttgttgccagtt	cloning
OFA0660	catcttgtgctaaggctaagaggtggtATCcataaatctggtgcttggttgttgccagtt	cloning
OFA0661	catcttgtgctaaggctaagaggtggtCACcataaatctggtgcttggttgttgccagtt	cloning
OFA0662	catcttgtgctaaggctaagaggtggtTACcataaatctggtgcttggttgttgccagtt	cloning
OFA0663	catcttgtgctaaggctaagaggtggtTGGcataaatctggtgcttggttgttgccagtt	cloning
OFA0664	catcttgtgctaaggctaagaggtggtTTGcataaatctggtgcttggttgttgccagtt	cloning
OFA0665	catcttgtgctaaggctaagaggtggtTTCcataaatctggtgcttggttgttgccagtt	cloning
OFA0666	catcttgtgctaaggctaagaggtggtAAGcataaatctggtgcttggttgttgccagtt	cloning
OFA0667	catcttgtgctaaggctaagaggtggtAGAcataaatctggtgcttggttgttgccagtt	cloning
OFA0753	accacctcttagccttagcacaagatg	cloning
OFA0820	gcacctgggtccttttcatc	Sanger sequencing
OFA0821	tatttctctgtcacccggcc	Sanger sequencing
OFA0822	atctggtgcttggttgttgc	Sanger sequencing
OFA0823	ggccccgttatgcaaaagaa	Sanger sequencing
OFA0824	gtcccgtattgctgccagat	Sanger sequencing
OFA0837	gagacggaaaactggttgaaaacgcatcgattgaggacattgaaaagatgattatgaccgatcGACATGGAGGCCCAGAATACCCTCC	DOA10 gene deletion
OFA0838	tgagggcagagataatcctatactcttggaagatgaagacccttgaaagcactcgcacgcatagCAGTATAGCGACCAGCATTCACATAC	DOA10 gene deletion
OFA0839	ACGCCCAGTACATCAACGAG	colony PCR
OFA0840	CAGCCCTTTCAGTAGGACCTC	colony PCR
OFA0841	GGTAAGCCGTGTCGTCAAGA	colony PCR
OFA0842	AGAAGGTATTGCTGGTGGCG	colony PCR
OFA0843	GATGGGGTTCACCCTCTGC	colony PCR
OFA0844	CTTTCGGCATTGACTTCCCC	colony PCR
OFA0845	AATCGGTAGCGCGTATGACT	colony PCR
OFA0846	CCTCAGTAGCTTCTCCACGAC	colony PCR
OFA0847	CCCAACATGGACAAGGATGC	colony PCR
OFA0848	GCGACAAGCAAGGGATCAAA	colony PCR
OFA0958	cacctcgttcccagaaacat	colony PCR
OFA1043	catcttgtgctaaggctaagaggtggtACGttgggttctggtgcttggttg	cloning
OFA1044	catcttgtgctaaggctaagaggtggtATGttgggttctggtgcttggttg	cloning
OFA1045	catcttgtgctaaggctaagaggtggtCCAttgggttctggtgcttggttg	cloning
OFA1046	catcttgtgctaaggctaagaggtggtGTTttgggttctggtgcttggttg	cloning
OFA1047	catcttgtgctaaggctaagaggtggtGGTttgggttctggtgcttggttg	cloning
OFA1048	catcttgtgctaaggctaagaggtggtTCTttgggttctggtgcttggttg	cloning
OFA1049	catcttgtgctaaggctaagaggtggtGCTttgggttctggtgcttggttg	cloning
OFA1050	catcttgtgctaaggctaagaggtggtTGTttgggttctggtgcttggttg	cloning
OFA1081	GCCCTGCCCCTAATCAGTAC	colony PCR
OFA1082	AGCCTGAAATGTGAAGCAGC	colony PCR
OFA1083	GACAGGCCGCCAACTTATTT	colony PCR
OFA1084	AGCCTGAAATGTGAAGCAGC	colony PCR
OFA1085	GGTTATCCAGTTGCCACACC	colony PCR
OFA1086	TAAGGGCTCTGCTCATGTCA	colony PCR
OFA1087	GGTTATCCAGTTGCCACACC	colony PCR
OFA1088	GTAAGCCGTGTCGTCAAGAG	colony PCR
OFA1089	gaggtggcctatcacgagaa	Sanger sequencing
OFA1090	aggaaatagccggtttgctt	Sanger sequencing
OFA1091	tcaacaggctctcagactacga	Sanger sequencing
OFA1092	aggaatcaatcctccccaag	Sanger sequencing
OFA1093	ggtcaggttgctttctcagg	Sanger sequencing
OFA1094	cggcatagtgcgtgtttatg	Sanger sequencing
OFA1095	gctctggaaagtgcctcatc	Sanger sequencing
OFA1102	gggtaagtgtagaaaagtgatgcgacggtttattttctcttcctcttgcgCTTCGTACGCTGCAGGTCGA	UBR1 gene deletion
OFA1103	cgtttgattgggtcgtgtataatgatacatattaacaactggggagttcaaaagttgccttcgcATCGATGAATTCGAGCTCG	UBR1 gene deletion
OFA1104	GGTTATCCAGTTGCCACACCAC	cloning
OFA1105	GATCCTAAATCATCATCAGCAACGG	cloning
OFA1106	ATGTCCGTTGCTGATGATGATTTAGG	cloning
OFA1107	GGGCTTGAATCTACCAAATCTCTCG	cloning
OFA1108	CGAGAGATTTGGTAGATTCAAGCCC	cloning
OFA1109	GCGCTCATCGGTGGGAAACTAATTTC	cloning
OFA1110	CAGTTGCCACACCACAAAAG	cloning
OFA1111	TTCCAAAGCCCATGATACTTGG	colony PCR
OFA1112	GCAAAGACGAGCCCCTCTAA	Sanger sequencing
OFA1113	CATGCCCTACGAATGCCAAA	Sanger sequencing
OFA1114	ACCGAGTTTGACGAAGCACT	Sanger sequencing
OFA1115	AGGCTTTGAAGGAGAACGGT	Sanger sequencing
OFA1116	ACGAATGGAGGGATTGGACT	Sanger sequencing
OFA1020	ttgtctataacgataaatttTCAGTTCGAGTTTATCATTATCAATAC	cloning
OFA1021	gcaagaggttctgtgaatttCAGTATAGCGACCAGCATTC	cloning
OFA1125	GATGTACTGGGCGTTATCAAAACTG	cloning
OFA1126	ACAGTTTTGATAACGCCCAGTACATC	cloning
OFA0222	cagtatagcgaccagcattcac	cloning
OFA0221	tcagttcgagtttatcattatcaatactgc	cloning
