# Supplementary material for: Variation in ubiquitin system genes creates substrate-specific effects on proteasomal protein degradation
Source: eLife. 2022 Oct 11;11:e79570. doi: 10.7554/eLife.79570 (PMC9634822; doi:10.7554/eLife.79570)
Supplement: Supplementary file 4. — Table of plasmids used in this study. [file elife-79570-supp4.xlsx]

## Sheet: Sheet1
Plasmid Number	Plasmid Descriptive Name	Plasmid Short Name	E. coli selectable marker	Promoter	Yeast Selectable Marker	Yeast Genomic Integration Site	UPS Pathway
PFA0001	NatMX4 plasmid	pAG25	AMP	TEF	NatMX	n/a	n/a
PFA0055	LEU2 Cas9-gCASS5a CRISPR-swap	LEU2 CRISPR-swap	AMP	LEU2	LEU2	n/a	n/a
PFA0190	LYP1 homology arm backbone plasmid	LYP1 backbone	AMP	n/a	n/a	LYP1	n/a
PFA0203	Gln TDH3pr mCherry/sfGFP TFT	Gln TFT	AMP/KAN	TDH3pr	KanMX	LYP1	Arg/N-end pathway
PFA0204	Asn TDH3pr mCherry/sfGFP TFT	Asn TFT	AMP/KAN	TDH3pr	KanMX	LYP1	Arg/N-end pathway
PFA0205	Glu TDH3pr mCherry/sfGFP TFT	Glu TFT	AMP/KAN	TDH3pr	KanMX	LYP1	Arg/N-end pathway
PFA0206	Asp TDH3pr mCherry/sfGFP TFT	Asp TFT	AMP/KAN	TDH3pr	KanMX	LYP1	Arg/N-end pathway
PFA0207	Ile TDH3pr mCherry/sfGFP TFT	Ile TFT	AMP/KAN	TDH3pr	KanMX	LYP1	Arg/N-end pathway
PFA0208	His TDH3pr mCherry/sfGFP TFT	His TFT	AMP/KAN	TDH3pr	KanMX	LYP1	Arg/N-end pathway
PFA0209	Tyr TDH3pr mCherry/sfGFP TFT	Tyr TFT	AMP/KAN	TDH3pr	KanMX	LYP1	Arg/N-end pathway
PFA0210	Trp TDH3pr mCherry/sfGFP TFT	Trp TFT	AMP/KAN	TDH3pr	KanMX	LYP1	Arg/N-end pathway
PFA0211	Leu TDH3pr mCherry/sfGFP TFT	Leu TFT	AMP/KAN	TDH3pr	KanMX	LYP1	Arg/N-end pathway
PFA0212	Phe TDH3pr mCherry/sfGFP TFT	Phe TFT	AMP/KAN	TDH3pr	KanMX	LYP1	Arg/N-end pathway
PFA0213	Lys TDH3pr mCherry/sfGFP TFT	Lys TFT	AMP/KAN	TDH3pr	KanMX	LYP1	Arg/N-end pathway
PFA0214	Arg TDH3pr mCherry/sfGFP TFT	Arg TFT	AMP/KAN	TDH3pr	KanMX	LYP1	Ac/N-end pathway
PFA0215	Thr TDH3pr mRuby/sfGFP TFT	Thr TFT	AMP/KAN	TDH3pr	KanMX	LYP1	Ac/N-end pathway
PFA0216	Met TDH3pr mRuby/sfGFP TFT	Met TFT	AMP/KAN	TDH3pr	KanMX	LYP1	Ac/N-end pathway
PFA0217	Pro TDH3pr mRuby/sfGFP TFT	Pro TFT	AMP/KAN	TDH3pr	KanMX	LYP1	Ac/N-end pathway
PFA0218	Val TDH3pr mRuby/sfGFP TFT	Val TFT	AMP/KAN	TDH3pr	KanMX	LYP1	Ac/N-end pathway
PFA0219	Gly TDH3pr mRuby/sfGFP TFT	Gly TFT	AMP/KAN	TDH3pr	KanMX	LYP1	Ac/N-end pathway
PFA0220	Ser TDH3pr mRuby/sfGFP TFT	Ser TFT	AMP/KAN	TDH3pr	KanMX	LYP1	Ac/N-end pathway
PFA0221	Ala TDH3pr mRuby/sfGFP TFT	Ala TFT	AMP/KAN	TDH3pr	KanMX	LYP1	Ac/N-end pathway
PFA0222	Cys TDH3pr mRuby/sfGFP TFT	Cys TFT	AMP/KAN	TDH3pr	KanMX	LYP1	Ac/N-end pathway
PFA0227	HIS3 Cas9-gCASS5a CRISPR-swap	His3 CRISPR-swap	AMP/KAN	HIS3	HIS3	n/a	n/a
