# Supplementary material for: Variation in ubiquitin system genes creates substrate-specific effects on proteasomal protein degradation
Source: eLife. 2022 Oct 11;11:e79570. doi: 10.7554/eLife.79570 (PMC9634822; doi:10.7554/eLife.79570)
Supplement: Supplementary file 5. — Table listing all yeast strains used in the study. [file elife-79570-supp5.xlsx]

## Sheet: Sheet1
Strain Number	Short Name	Strain Genotype	Mating Type	Antibiotic Resistance	Derived From	Use
YFA0040	BY	MATa his3∆ ho∆	a	G418	n/a	strain construction
YFA0039	RM	MAT⍺ can1∆::STE2pr-SpHIS5 his3∆::NatMX AMN1-BY ho∆::HphMX URA3-FY	alpha	G418/clonNAT	n/a	strain construction
YFA0427	rpn4∆	MATa his3∆ ho∆ rpn4Δ::NatMX	a	G418/ClonNAT	BY	strain construction
YFA1222	ubr1∆	MATa his3∆ ho∆ ubr1Δ::NatMX	a	G418/clonNAT	BY	strain construction
YFA1225	doa10∆	MATa his3∆ ho∆ doa10Δ::NatMX	a	G418/clonNAT	BY	strain construction
YPFA19_01	BY_Gln_TFT	MATa his3∆ ho∆ lyp1Δ::kanMX	a	G418	n/a	reporter characterization
YPFA19_02	RM_Gln_TFT	MAT⍺ can1∆::STE2pr-SpHIS5 his3∆::NatMX AMN1-BY ho∆::HphMX URA3-FY lyp1Δ::kanMX	alpha	G418/clonNAT	n/a	reporter characterization
YPFA19_03	rpn4_Gln_TFT	MATa his3∆ ho∆ rpn4Δ::NatMX lyp1Δ::kanMX	a	G418/ClonNAT	BY	reporter characterization
YPFA19_04	ubr1_Gln_TFT	MATa his3∆ ho∆ ubr1Δ::NatMX lyp1Δ::kanMX	a	G418/clonNAT	BY	reporter characterization
YPFA19_05	doa10_Gln_TFT	MATa his3∆ ho∆ doa10Δ::NatMX lyp1Δ::kanMX	a	G418/clonNAT	BY	reporter characterization
YPFA19_06	BY_Asn_TFT	MATa his3∆ ho∆ lyp1Δ::kanMX	a	G418	n/a	reporter characterization
YPFA19_07	RM_Asn_TFT	MAT⍺ can1∆::STE2pr-SpHIS5 his3∆::NatMX AMN1-BY ho∆::HphMX URA3-FY lyp1Δ::kanMX	alpha	G418/clonNAT	n/a	reporter characterization
YPFA19_08	rpn4_Asn_TFT	MATa his3∆ ho∆ rpn4Δ::NatMX lyp1Δ::kanMX	a	G418/ClonNAT	BY	reporter characterization
YPFA19_09	ubr1_Asn_TFT	MATa his3∆ ho∆ ubr1Δ::NatMX lyp1Δ::kanMX	a	G418/clonNAT	BY	reporter characterization
YPFA19_10	doa10_Asn_TFT	MATa his3∆ ho∆ doa10Δ::NatMX lyp1Δ::kanMX	a	G418/clonNAT	BY	reporter characterization
YPFA20_01	BY_Glu_TFT	MATa his3∆ ho∆ lyp1Δ::kanMX	a	G418	n/a	reporter characterization
YPFA20_02	RM_Glu_TFT	MAT⍺ can1∆::STE2pr-SpHIS5 his3∆::NatMX AMN1-BY ho∆::HphMX URA3-FY lyp1Δ::kanMX	alpha	G418/clonNAT	n/a	reporter characterization
YPFA20_03	rpn4_Glu_TFT	MATa his3∆ ho∆ rpn4Δ::NatMX lyp1Δ::kanMX	a	G418/ClonNAT	BY	reporter characterization
YPFA20_04	ubr1_Glu_TFT	MATa his3∆ ho∆ ubr1Δ::NatMX lyp1Δ::kanMX	a	G418/clonNAT	BY	reporter characterization
YPFA20_05	doa10_Glu_TFT	MATa his3∆ ho∆ doa10Δ::NatMX lyp1Δ::kanMX	a	G418/clonNAT	BY	reporter characterization
YPFA20_06	BY_Asp_TFT	MATa his3∆ ho∆ lyp1Δ::kanMX	a	G418	n/a	reporter characterization
YPFA20_07	RM_Asp_TFT	MAT⍺ can1∆::STE2pr-SpHIS5 his3∆::NatMX AMN1-BY ho∆::HphMX URA3-FY lyp1Δ::kanMX	alpha	G418/clonNAT	n/a	reporter characterization
YPFA20_08	rpn4_Asp_TFT	MATa his3∆ ho∆ rpn4Δ::NatMX lyp1Δ::kanMX	a	G418/ClonNAT	BY	reporter characterization
YPFA20_09	ubr1_Asp_TFT	MATa his3∆ ho∆ ubr1Δ::NatMX lyp1Δ::kanMX	a	G418/clonNAT	BY	reporter characterization
YPFA20_10	doa10_Asp_TFT	MATa his3∆ ho∆ doa10Δ::NatMX lyp1Δ::kanMX	a	G418/clonNAT	BY	reporter characterization
YPFA21_01	BY_Ile_TFT	MATa his3∆ ho∆ lyp1Δ::kanMX	a	G418	n/a	reporter characterization
YPFA21_02	RM_Ile_TFT	MAT⍺ can1∆::STE2pr-SpHIS5 his3∆::NatMX AMN1-BY ho∆::HphMX URA3-FY lyp1Δ::kanMX	alpha	G418/clonNAT	n/a	reporter characterization
YPFA21_03	rpn4_Ile_TFT	MATa his3∆ ho∆ rpn4Δ::NatMX lyp1Δ::kanMX	a	G418/ClonNAT	BY	reporter characterization
YPFA21_04	ubr1_Ile_TFT	MATa his3∆ ho∆ ubr1Δ::NatMX lyp1Δ::kanMX	a	G418/clonNAT	BY	reporter characterization
YPFA21_05	doa10_Ile_TFT	MATa his3∆ ho∆ doa10Δ::NatMX lyp1Δ::kanMX	a	G418/clonNAT	BY	reporter characterization
YPFA21_06	BY_His_TFT	MATa his3∆ ho∆ lyp1Δ::kanMX	a	G418	n/a	reporter characterization
YPFA21_07	RM_His_TFT	MAT⍺ can1∆::STE2pr-SpHIS5 his3∆::NatMX AMN1-BY ho∆::HphMX URA3-FY lyp1Δ::kanMX	alpha	G418/clonNAT	n/a	reporter characterization
YPFA21_08	rpn4_His_TFT	MATa his3∆ ho∆ rpn4Δ::NatMX lyp1Δ::kanMX	a	G418/ClonNAT	BY	reporter characterization
YPFA21_09	ubr1_His_TFT	MATa his3∆ ho∆ ubr1Δ::NatMX lyp1Δ::kanMX	a	G418/clonNAT	BY	reporter characterization
YPFA21_10	doa10_His_TFT	MATa his3∆ ho∆ doa10Δ::NatMX lyp1Δ::kanMX	a	G418/clonNAT	BY	reporter characterization
YPFA22_01	BY_Tyr_TFT	MATa his3∆ ho∆ lyp1Δ::kanMX	a	G418	n/a	reporter characterization
YPFA22_02	RM_Tyr_TFT	MAT⍺ can1∆::STE2pr-SpHIS5 his3∆::NatMX AMN1-BY ho∆::HphMX URA3-FY lyp1Δ::kanMX	alpha	G418/clonNAT	n/a	reporter characterization
YPFA22_03	rpn4_Tyr_TFT	MATa his3∆ ho∆ rpn4Δ::NatMX lyp1Δ::kanMX	a	G418/ClonNAT	BY	reporter characterization
YPFA22_04	ubr1_Tyr_TFT	MATa his3∆ ho∆ ubr1Δ::NatMX lyp1Δ::kanMX	a	G418/clonNAT	BY	reporter characterization
YPFA22_05	doa10_Tyr_TFT	MATa his3∆ ho∆ doa10Δ::NatMX lyp1Δ::kanMX	a	G418/clonNAT	BY	reporter characterization
YPFA22_06	BY_Trp_TFT	MATa his3∆ ho∆ lyp1Δ::kanMX	a	G418	n/a	reporter characterization
YPFA22_07	RM_Trp_TFT	MAT⍺ can1∆::STE2pr-SpHIS5 his3∆::NatMX AMN1-BY ho∆::HphMX URA3-FY lyp1Δ::kanMX	alpha	G418/clonNAT	n/a	reporter characterization
YPFA22_08	rpn4_Trp_TFT	MATa his3∆ ho∆ rpn4Δ::NatMX lyp1Δ::kanMX	a	G418/ClonNAT	BY	reporter characterization
YPFA22_09	ubr1_Trp_TFT	MATa his3∆ ho∆ ubr1Δ::NatMX lyp1Δ::kanMX	a	G418/clonNAT	BY	reporter characterization
YPFA22_10	doa10_Trp_TFT	MATa his3∆ ho∆ doa10Δ::NatMX lyp1Δ::kanMX	a	G418/clonNAT	BY	reporter characterization
YPFA23_01	BY_Leu_TFT	MATa his3∆ ho∆ lyp1Δ::kanMX	a	G418	n/a	reporter characterization
YPFA23_02	RM_Leu_TFT	MAT⍺ can1∆::STE2pr-SpHIS5 his3∆::NatMX AMN1-BY ho∆::HphMX URA3-FY lyp1Δ::kanMX	alpha	G418/clonNAT	n/a	reporter characterization
YPFA23_03	rpn4_Leu_TFT	MATa his3∆ ho∆ rpn4Δ::NatMX lyp1Δ::kanMX	a	G418/ClonNAT	BY	reporter characterization
YPFA23_04	ubr1_Leu_TFT	MATa his3∆ ho∆ ubr1Δ::NatMX lyp1Δ::kanMX	a	G418/clonNAT	BY	reporter characterization
YPFA23_05	doa10_Leu_TFT	MATa his3∆ ho∆ doa10Δ::NatMX lyp1Δ::kanMX	a	G418/clonNAT	BY	reporter characterization
YPFA23_06	BY_Phe_TFT	MATa his3∆ ho∆ lyp1Δ::kanMX	a	G418	n/a	reporter characterization
YPFA23_07	RM_Phe_TFT	MAT⍺ can1∆::STE2pr-SpHIS5 his3∆::NatMX AMN1-BY ho∆::HphMX URA3-FY lyp1Δ::kanMX	alpha	G418/clonNAT	n/a	reporter characterization
YPFA23_08	rpn4_Phe_TFT	MATa his3∆ ho∆ rpn4Δ::NatMX lyp1Δ::kanMX	a	G418/ClonNAT	BY	reporter characterization
YPFA23_09	ubr1_Phe_TFT	MATa his3∆ ho∆ ubr1Δ::NatMX lyp1Δ::kanMX	a	G418/clonNAT	BY	reporter characterization
YPFA23_10	doa10_Phe_TFT	MATa his3∆ ho∆ doa10Δ::NatMX lyp1Δ::kanMX	a	G418/clonNAT	BY	reporter characterization
YPFA24_01	BY_Lys_TFT	MATa his3∆ ho∆ lyp1Δ::kanMX	a	G418	n/a	reporter characterization
YPFA24_02	RM_Lys_TFT	MAT⍺ can1∆::STE2pr-SpHIS5 his3∆::NatMX AMN1-BY ho∆::HphMX URA3-FY lyp1Δ::kanMX	alpha	G418/clonNAT	n/a	reporter characterization
YPFA24_03	rpn4_Lys_TFT	MATa his3∆ ho∆ rpn4Δ::NatMX lyp1Δ::kanMX	a	G418/ClonNAT	BY	reporter characterization
YPFA24_04	ubr1_Lys_TFT	MATa his3∆ ho∆ ubr1Δ::NatMX lyp1Δ::kanMX	a	G418/clonNAT	BY	reporter characterization
YPFA24_05	doa10_Lys_TFT	MATa his3∆ ho∆ doa10Δ::NatMX lyp1Δ::kanMX	a	G418/clonNAT	BY	reporter characterization
YPFA24_06	BY_Arg_TFT	MATa his3∆ ho∆ lyp1Δ::kanMX	a	G418	n/a	reporter characterization
YPFA24_07	RM_Arg_TFT	MAT⍺ can1∆::STE2pr-SpHIS5 his3∆::NatMX AMN1-BY ho∆::HphMX URA3-FY lyp1Δ::kanMX	alpha	G418/clonNAT	n/a	reporter characterization
YPFA24_08	rpn4_Arg_TFT	MATa his3∆ ho∆ rpn4Δ::NatMX lyp1Δ::kanMX	a	G418/ClonNAT	BY	reporter characterization
YPFA24_09	ubr1_Arg_TFT	MATa his3∆ ho∆ ubr1Δ::NatMX lyp1Δ::kanMX	a	G418/clonNAT	BY	reporter characterization
YPFA24_10	doa10_Arg_TFT	MATa his3∆ ho∆ doa10Δ::NatMX lyp1Δ::kanMX	a	G418/clonNAT	BY	reporter characterization
YPFA25_01	BY_Thr_TFT	MATa his3∆ ho∆ lyp1Δ::kanMX	a	G418	n/a	reporter characterization
YPFA25_02	RM_Thr_TFT	MAT⍺ can1∆::STE2pr-SpHIS5 his3∆::NatMX AMN1-BY ho∆::HphMX URA3-FY lyp1Δ::kanMX	alpha	G418/clonNAT	n/a	reporter characterization
YPFA25_03	rpn4_Thr_TFT	MATa his3∆ ho∆ rpn4Δ::NatMX lyp1Δ::kanMX	a	G418/ClonNAT	BY	reporter characterization
YPFA25_04	ubr1_Thr_TFT	MATa his3∆ ho∆ ubr1Δ::NatMX lyp1Δ::kanMX	a	G418/clonNAT	BY	reporter characterization
YPFA25_05	doa10_Thr_TFT	MATa his3∆ ho∆ doa10Δ::NatMX lyp1Δ::kanMX	a	G418/clonNAT	BY	reporter characterization
YPFA25_06	BY_Met_TFT	MATa his3∆ ho∆ lyp1Δ::kanMX	a	G418	n/a	reporter characterization
YPFA25_07	RM_Met_TFT	MAT⍺ can1∆::STE2pr-SpHIS5 his3∆::NatMX AMN1-BY ho∆::HphMX URA3-FY lyp1Δ::kanMX	alpha	G418/clonNAT	n/a	reporter characterization
YPFA25_08	rpn4_Met_TFT	MATa his3∆ ho∆ rpn4Δ::NatMX lyp1Δ::kanMX	a	G418/ClonNAT	BY	reporter characterization
YPFA25_09	ubr1_Met_TFT	MATa his3∆ ho∆ ubr1Δ::NatMX lyp1Δ::kanMX	a	G418/clonNAT	BY	reporter characterization
YPFA25_10	doa10_Met_TFT	MATa his3∆ ho∆ doa10Δ::NatMX lyp1Δ::kanMX	a	G418/clonNAT	BY	reporter characterization
YPFA26_01	BY_Pro_TFT	MATa his3∆ ho∆ lyp1Δ::kanMX	a	G418	n/a	reporter characterization
YPFA26_02	RM_Pro_TFT	MAT⍺ can1∆::STE2pr-SpHIS5 his3∆::NatMX AMN1-BY ho∆::HphMX URA3-FY lyp1Δ::kanMX	alpha	G418/clonNAT	n/a	reporter characterization
YPFA26_03	rpn4_Pro_TFT	MATa his3∆ ho∆ rpn4Δ::NatMX lyp1Δ::kanMX	a	G418/ClonNAT	BY	reporter characterization
YPFA26_04	ubr1_Pro_TFT	MATa his3∆ ho∆ ubr1Δ::NatMX lyp1Δ::kanMX	a	G418/clonNAT	BY	reporter characterization
YPFA26_05	doa10_Pro_TFT	MATa his3∆ ho∆ doa10Δ::NatMX lyp1Δ::kanMX	a	G418/clonNAT	BY	reporter characterization
YPFA26_06	BY_Val_TFT	MATa his3∆ ho∆ lyp1Δ::kanMX	a	G418	n/a	reporter characterization
YPFA26_07	RM_Val_TFT	MAT⍺ can1∆::STE2pr-SpHIS5 his3∆::NatMX AMN1-BY ho∆::HphMX URA3-FY lyp1Δ::kanMX	alpha	G418/clonNAT	n/a	reporter characterization
YPFA26_08	rpn4_Val_TFT	MATa his3∆ ho∆ rpn4Δ::NatMX lyp1Δ::kanMX	a	G418/ClonNAT	BY	reporter characterization
YPFA26_09	ubr1_Val_TFT	MATa his3∆ ho∆ ubr1Δ::NatMX lyp1Δ::kanMX	a	G418/clonNAT	BY	reporter characterization
YPFA26_10	doa10_Val_TFT	MATa his3∆ ho∆ doa10Δ::NatMX lyp1Δ::kanMX	a	G418/clonNAT	BY	reporter characterization
YPFA27_01	BY_Gly_TFT	MATa his3∆ ho∆ lyp1Δ::kanMX	a	G418	n/a	reporter characterization
YPFA27_02	RM_Gly_TFT	MAT⍺ can1∆::STE2pr-SpHIS5 his3∆::NatMX AMN1-BY ho∆::HphMX URA3-FY lyp1Δ::kanMX	alpha	G418/clonNAT	n/a	reporter characterization
YPFA27_03	rpn4_Gly_TFT	MATa his3∆ ho∆ rpn4Δ::NatMX lyp1Δ::kanMX	a	G418/ClonNAT	BY	reporter characterization
YPFA27_04	ubr1_Gly_TFT	MATa his3∆ ho∆ ubr1Δ::NatMX lyp1Δ::kanMX	a	G418/clonNAT	BY	reporter characterization
YPFA27_05	doa10_Gly_TFT	MATa his3∆ ho∆ doa10Δ::NatMX lyp1Δ::kanMX	a	G418/clonNAT	BY	reporter characterization
YPFA27_06	BY_Ser_TFT	MATa his3∆ ho∆ lyp1Δ::kanMX	a	G418	n/a	reporter characterization
YPFA27_07	RM_Ser_TFT	MAT⍺ can1∆::STE2pr-SpHIS5 his3∆::NatMX AMN1-BY ho∆::HphMX URA3-FY lyp1Δ::kanMX	alpha	G418/clonNAT	n/a	reporter characterization
YPFA27_08	rpn4_Ser_TFT	MATa his3∆ ho∆ rpn4Δ::NatMX lyp1Δ::kanMX	a	G418/ClonNAT	BY	reporter characterization
YPFA27_09	ubr1_Ser_TFT	MATa his3∆ ho∆ ubr1Δ::NatMX lyp1Δ::kanMX	a	G418/clonNAT	BY	reporter characterization
YPFA27_10	doa10_Ser_TFT	MATa his3∆ ho∆ doa10Δ::NatMX lyp1Δ::kanMX	a	G418/clonNAT	BY	reporter characterization
YPFA28_01	BY_Ala_TFT	MATa his3∆ ho∆ lyp1Δ::kanMX	a	G418	n/a	reporter characterization
YPFA28_02	RM_Ala_TFT	MAT⍺ can1∆::STE2pr-SpHIS5 his3∆::NatMX AMN1-BY ho∆::HphMX URA3-FY lyp1Δ::kanMX	alpha	G418/clonNAT	n/a	reporter characterization
YPFA28_03	rpn4_Ala_TFT	MATa his3∆ ho∆ rpn4Δ::NatMX lyp1Δ::kanMX	a	G418/ClonNAT	BY	reporter characterization
YPFA28_04	ubr1_Ala_TFT	MATa his3∆ ho∆ ubr1Δ::NatMX lyp1Δ::kanMX	a	G418/clonNAT	BY	reporter characterization
YPFA28_05	doa10_Ala_TFT	MATa his3∆ ho∆ doa10Δ::NatMX lyp1Δ::kanMX	a	G418/clonNAT	BY	reporter characterization
YPFA28_06	BY_Cys_TFT	MATa his3∆ ho∆ lyp1Δ::kanMX	a	G418	n/a	reporter characterization
YPFA28_07	RM_Cys_TFT	MAT⍺ can1∆::STE2pr-SpHIS5 his3∆::NatMX AMN1-BY ho∆::HphMX URA3-FY lyp1Δ::kanMX	alpha	G418/clonNAT	n/a	reporter characterization
YPFA28_08	rpn4_Cys_TFT	MATa his3∆ ho∆ rpn4Δ::NatMX lyp1Δ::kanMX	a	G418/ClonNAT	BY	reporter characterization
YPFA28_09	ubr1_Cys_TFT	MATa his3∆ ho∆ ubr1Δ::NatMX lyp1Δ::kanMX	a	G418/clonNAT	BY	reporter characterization
YPFA28_10	doa10_Cys_TFT	MATa his3∆ ho∆ doa10Δ::NatMX lyp1Δ::kanMX	a	G418/clonNAT	BY	reporter characterization
SFA01	segregants_Gln_TFT_01	MATa his3∆ ho∆ can1∆::STE2pr-SpHIS5 lyp1Δ::kanMX	a	G418	BY x RM mating	genetic mapping
SFA02	segregants_Gln_TFT_02	MATa his3∆ ho∆ can1∆::STE2pr-SpHIS5 lyp1Δ::kanMX	a	G418	BY x RM mating	genetic mapping
SFA03	segregants_Asn_TFT_01	MATa his3∆ ho∆ can1∆::STE2pr-SpHIS5 lyp1Δ::kanMX	a	G418	BY x RM mating	genetic mapping
SFA04	segregants_Asn_TFT_02	MATa his3∆ ho∆ can1∆::STE2pr-SpHIS5 lyp1Δ::kanMX	a	G418	BY x RM mating	genetic mapping
SFA05	segregants_Glu_TFT_01	MATa his3∆ ho∆ can1∆::STE2pr-SpHIS5 lyp1Δ::kanMX	a	G418	BY x RM mating	genetic mapping
SFA06	segregants_Glu_TFT_02	MATa his3∆ ho∆ can1∆::STE2pr-SpHIS5 lyp1Δ::kanMX	a	G418	BY x RM mating	genetic mapping
SFA07	segregants_Asp_TFT_01	MATa his3∆ ho∆ can1∆::STE2pr-SpHIS5 lyp1Δ::kanMX	a	G418	BY x RM mating	genetic mapping
SFA08	segregants_Asp_TFT_02	MATa his3∆ ho∆ can1∆::STE2pr-SpHIS5 lyp1Δ::kanMX	a	G418	BY x RM mating	genetic mapping
SFA09	segregants_Ile_TFT_01	MATa his3∆ ho∆ can1∆::STE2pr-SpHIS5 lyp1Δ::kanMX	a	G418	BY x RM mating	genetic mapping
SFA10	segregants_Ile_TFT_02	MATa his3∆ ho∆ can1∆::STE2pr-SpHIS5 lyp1Δ::kanMX	a	G418	BY x RM mating	genetic mapping
SFA11	segregants_His_TFT_01	MATa his3∆ ho∆ can1∆::STE2pr-SpHIS5 lyp1Δ::kanMX	a	G418	BY x RM mating	genetic mapping
SFA12	segregants_His_TFT_02	MATa his3∆ ho∆ can1∆::STE2pr-SpHIS5 lyp1Δ::kanMX	a	G418	BY x RM mating	genetic mapping
SFA13	segregants_Tyr_TFT_01	MATa his3∆ ho∆ can1∆::STE2pr-SpHIS5 lyp1Δ::kanMX	a	G418	BY x RM mating	genetic mapping
SFA14	segregants_Tyr_TFT_02	MATa his3∆ ho∆ can1∆::STE2pr-SpHIS5 lyp1Δ::kanMX	a	G418	BY x RM mating	genetic mapping
SFA15	segregants_Trp_TFT_01	MATa his3∆ ho∆ can1∆::STE2pr-SpHIS5 lyp1Δ::kanMX	a	G418	BY x RM mating	genetic mapping
SFA16	segregants_Trp_TFT_02	MATa his3∆ ho∆ can1∆::STE2pr-SpHIS5 lyp1Δ::kanMX	a	G418	BY x RM mating	genetic mapping
SFA17	segregants_Leu_TFT_01	MATa his3∆ ho∆ can1∆::STE2pr-SpHIS5 lyp1Δ::kanMX	a	G418	BY x RM mating	genetic mapping
SFA18	segregants_Leu_TFT_02	MATa his3∆ ho∆ can1∆::STE2pr-SpHIS5 lyp1Δ::kanMX	a	G418	BY x RM mating	genetic mapping
SFA19	segregants_Phe_TFT_01	MATa his3∆ ho∆ can1∆::STE2pr-SpHIS5 lyp1Δ::kanMX	a	G418	BY x RM mating	genetic mapping
SFA20	segregants_Phe_TFT_02	MATa his3∆ ho∆ can1∆::STE2pr-SpHIS5 lyp1Δ::kanMX	a	G418	BY x RM mating	genetic mapping
SFA21	segregants_Lys_TFT_01	MATa his3∆ ho∆ can1∆::STE2pr-SpHIS5 lyp1Δ::kanMX	a	G418	BY x RM mating	genetic mapping
SFA22	segregants_Lys_TFT_02	MATa his3∆ ho∆ can1∆::STE2pr-SpHIS5 lyp1Δ::kanMX	a	G418	BY x RM mating	genetic mapping
SFA23	segregants_Arg_TFT_01	MATa his3∆ ho∆ can1∆::STE2pr-SpHIS5 lyp1Δ::kanMX	a	G418	BY x RM mating	genetic mapping
SFA24	segregants_Arg_TFT_02	MATa his3∆ ho∆ can1∆::STE2pr-SpHIS5 lyp1Δ::kanMX	a	G418	BY x RM mating	genetic mapping
SFA25	segregants_Thr_TFT_01	MATa his3∆ ho∆ can1∆::STE2pr-SpHIS5 lyp1Δ::kanMX	a	G418	BY x RM mating	genetic mapping
SFA26	segregants_Thr_TFT_02	MATa his3∆ ho∆ can1∆::STE2pr-SpHIS5 lyp1Δ::kanMX	a	G418	BY x RM mating	genetic mapping
SFA27	segregants_Met_TFT_01	MATa his3∆ ho∆ can1∆::STE2pr-SpHIS5 lyp1Δ::kanMX	a	G418	BY x RM mating	genetic mapping
SFA28	segregants_Met_TFT_02	MATa his3∆ ho∆ can1∆::STE2pr-SpHIS5 lyp1Δ::kanMX	a	G418	BY x RM mating	genetic mapping
SFA29	segregants_Pro_TFT_01	MATa his3∆ ho∆ can1∆::STE2pr-SpHIS5 lyp1Δ::kanMX	a	G418	BY x RM mating	genetic mapping
SFA30	segregants_Pro_TFT_02	MATa his3∆ ho∆ can1∆::STE2pr-SpHIS5 lyp1Δ::kanMX	a	G418	BY x RM mating	genetic mapping
SFA31	segregants_Val_TFT_01	MATa his3∆ ho∆ can1∆::STE2pr-SpHIS5 lyp1Δ::kanMX	a	G418	BY x RM mating	genetic mapping
SFA32	segregants_Val_TFT_02	MATa his3∆ ho∆ can1∆::STE2pr-SpHIS5 lyp1Δ::kanMX	a	G418	BY x RM mating	genetic mapping
SFA33	segregants_Gly_TFT_01	MATa his3∆ ho∆ can1∆::STE2pr-SpHIS5 lyp1Δ::kanMX	a	G418	BY x RM mating	genetic mapping
SFA34	segregants_Gly_TFT_02	MATa his3∆ ho∆ can1∆::STE2pr-SpHIS5 lyp1Δ::kanMX	a	G418	BY x RM mating	genetic mapping
SFA35	segregants_Ser_TFT_01	MATa his3∆ ho∆ can1∆::STE2pr-SpHIS5 lyp1Δ::kanMX	a	G418	BY x RM mating	genetic mapping
SFA36	segregants_Ser_TFT_02	MATa his3∆ ho∆ can1∆::STE2pr-SpHIS5 lyp1Δ::kanMX	a	G418	BY x RM mating	genetic mapping
SFA37	segregants_Ala_TFT_01	MATa his3∆ ho∆ can1∆::STE2pr-SpHIS5 lyp1Δ::kanMX	a	G418	BY x RM mating	genetic mapping
SFA38	segregants_Ala_TFT_02	MATa his3∆ ho∆ can1∆::STE2pr-SpHIS5 lyp1Δ::kanMX	a	G418	BY x RM mating	genetic mapping
SFA39	segregants_Cys_TFT_01	MATa his3∆ ho∆ can1∆::STE2pr-SpHIS5 lyp1Δ::kanMX	a	G418	BY x RM mating	genetic mapping
SFA40	segregants_Cys_TFT_02	MATa his3∆ ho∆ can1∆::STE2pr-SpHIS5 lyp1Δ::kanMX	a	G418	BY x RM mating	genetic mapping
YPFA029_01	BY_Trp TFT	MATa his3∆ ho∆ UBR1 lyp1Δ::kanMX	a	G418	BY	fine-mapping
YPFA029_02	BY ubr1-BY_Trp TFT	MATa his3∆ ho∆ ubr1-BY lyp1Δ::kanMX	a	G418	BY	fine-mapping
YPFA029_03	BY ubr1-RM_Trp TFT	MATa his3∆ ho∆ ubr1-RM lyp1Δ::kanMX	a	G418	BY	fine-mapping
YPFA029_04	BY ubr1-RM pr_Trp TFT	MATa his3∆ ho∆ ubr1-RM pr lyp1Δ::kanMX	a	G418	BY	fine-mapping
YPFA029_05	BY ubr1-RM ORF_Trp TFT	MATa his3∆ ho∆ ubr1-RM ORF lyp1Δ::kanMX	a	G418	BY	fine-mapping
YPFA029_06	BY ubr1-RM term_Trp TFT	MATa his3∆ ho∆ ubr1-RM term lyp1Δ::kanMX	a	G418	BY	fine-mapping
YPFA029_07	BY ubr1--469A>T_Trp TFT	MATa his3∆ ho∆ ubr1--469A>T lyp1Δ::kanMX	a	G418	BY	fine-mapping
YPFA029_08	BY ubr1--197T>G _Trp TFT	MATa his3∆ ho∆ ubr1--197T>G lyp1Δ::kanMX	a	G418	BY	fine-mapping
YPFA030_01	BY_Phe TFT	MATa his3∆ ho∆ UBR1 lyp1Δ::kanMX	a	G418	BY	fine-mapping
YPFA030_02	BY ubr1-BY_Phe TFT	MATa his3∆ ho∆ ubr1-BY lyp1Δ::kanMX	a	G418	BY	fine-mapping
YPFA030_03	BY ubr1-RM_Phe TFT	MATa his3∆ ho∆ ubr1-RM lyp1Δ::kanMX	a	G418	BY	fine-mapping
YPFA030_04	BY ubr1-RM pr_Phe TFT	MATa his3∆ ho∆ ubr1-RM pr lyp1Δ::kanMX	a	G418	BY	fine-mapping
YPFA030_05	BY ubr1-RM ORF_Phe TFT	MATa his3∆ ho∆ ubr1-RM ORF lyp1Δ::kanMX	a	G418	BY	fine-mapping
YPFA030_06	BY ubr1-RM term_Phe TFT	MATa his3∆ ho∆ ubr1-RM term lyp1Δ::kanMX	a	G418	BY	fine-mapping
YPFA030_07	BY ubr1--469A>T_Phe TFT	MATa his3∆ ho∆ ubr1--469A>T lyp1Δ::kanMX	a	G418	BY	fine-mapping
YPFA030_08	BY ubr1--197T>G _Phe TFT	MATa his3∆ ho∆ ubr1--197T>G lyp1Δ::kanMX	a	G418	BY	fine-mapping
YPFA031_01	BY_Asn TFT	MATa his3∆ ho∆ UBR1 lyp1Δ::kanMX	a	G418	BY	fine-mapping
YPFA031_02	BY ubr1-BY_Asn TFT	MATa his3∆ ho∆ ubr1-BY lyp1Δ::kanMX	a	G418	BY	fine-mapping
YPFA031_03	BY ubr1-RM_Asn TFT	MATa his3∆ ho∆ ubr1-RM lyp1Δ::kanMX	a	G418	BY	fine-mapping
YPFA031_04	BY ubr1-RM pr_Asn TFT	MATa his3∆ ho∆ ubr1-RM pr lyp1Δ::kanMX	a	G418	BY	fine-mapping
YPFA031_05	BY ubr1-RM ORF_Asn TFT	MATa his3∆ ho∆ ubr1-RM ORF lyp1Δ::kanMX	a	G418	BY	fine-mapping
YPFA031_06	BY ubr1-RM term_Asn TFT	MATa his3∆ ho∆ ubr1-RM term lyp1Δ::kanMX	a	G418	BY	fine-mapping
YPFA032_01	BY_Arg TFT	MATa his3∆ ho∆ UBR1 lyp1Δ::kanMX	a	G418	BY	fine-mapping
YPFA032_02	BY ubr1-BY_Arg TFT	MATa his3∆ ho∆ ubr1-BY lyp1Δ::kanMX	a	G418	BY	fine-mapping
YPFA032_03	BY ubr1-RM_Arg TFT	MATa his3∆ ho∆ ubr1-RM lyp1Δ::kanMX	a	G418	BY	fine-mapping
YPFA032_04	BY ubr1-RM pr_Arg TFT	MATa his3∆ ho∆ ubr1-RM pr lyp1Δ::kanMX	a	G418	BY	fine-mapping
YPFA032_05	BY ubr1-RM ORF_Arg TFT	MATa his3∆ ho∆ ubr1-RM ORF lyp1Δ::kanMX	a	G418	BY	fine-mapping
YPFA032_06	BY ubr1-RM term_Arg TFT	MATa his3∆ ho∆ ubr1-RM term lyp1Δ::kanMX	a	G418	BY	fine-mapping
YPFA033_01	BY doa10-BY_Gly TFT	MATa his3∆ ho∆ doa10-BY lyp1Δ::kanMX	a	G418	BY	fine-mapping
YPFA033_02	BY doa10-RM_Gly TFT	MATa his3∆ ho∆ doa10-RM lyp1Δ::kanMX	a	G418	BY	fine-mapping
YPFA033_03	BY doa10-Q410E_Gly TFT	MATa his3∆ ho∆ doa10-Q410E lyp1Δ::kanMX	a	G418	BY	fine-mapping
YPFA033_04	BY doa10-K1012N_Gly TFT	MATa his3∆ ho∆ doa10-K1012N lyp1Δ::kanMX	a	G418	BY	fine-mapping
YPFA033_05	BY doa10-Y1186F_Gly TFT	MATa his3∆ ho∆ doa10-Y1186F lyp1Δ::kanMX	a	G418	BY	fine-mapping
YPFA033_06	BY doa10-BY_Thr TFT	MATa his3∆ ho∆ doa10-BY lyp1Δ::kanMX	a	G418	BY	fine-mapping
YPFA033_07	BY doa10-RM_Thr TFT	MATa his3∆ ho∆ doa10-RM lyp1Δ::kanMX	a	G418	BY	fine-mapping
YPFA033_08	BY doa10-Q410E_Thr TFT	MATa his3∆ ho∆ doa10-Q410E lyp1Δ::kanMX	a	G418	BY	fine-mapping
YPFA033_09	BY doa10-K1012N_Thr TFT	MATa his3∆ ho∆ doa10-K1012N lyp1Δ::kanMX	a	G418	BY	fine-mapping
YPFA033_10	BY doa10-Y1186F_Thr TFT	MATa his3∆ ho∆ doa10-Y1186F lyp1Δ::kanMX	a	G418	BY	fine-mapping
YPFA034_10	BY ubc6-BY_Ala TFT	MATa his3∆ ho∆ ubc6-BY lyp1Δ::kanMX	a	G418	BY	fine-mapping
YPFA034_11	BY ubc6-RM_Ala TFT	MATa his3∆ ho∆ ubc6-RM lyp1Δ::kanMX	a	G418	BY	fine-mapping
YPFA034_12	BY ubc6-RM pr_Ala TFT	MATa his3∆ ho∆ ubc6-RM pr lyp1Δ::kanMX	a	G418	BY	fine-mapping
YPFA034_13	BY ubc6-D229G_Ala TFT	MATa his3∆ ho∆ ubc6-D229G lyp1Δ::kanMX	a	G418	BY	fine-mapping
YPFA034_14	BY ubc6-RM term_Ala TFT	MATa his3∆ ho∆ ubc6-RM term lyp1Δ::kanMX	a	G418	BY	fine-mapping
YPFA034_15	BY ubc6-BY_Thr TFT	MATa his3∆ ho∆ ubc6-BY lyp1Δ::kanMX	a	G418	BY	fine-mapping
YPFA034_16	BY ubc6-RM_Thr TFT	MATa his3∆ ho∆ ubc6-RM lyp1Δ::kanMX	a	G418	BY	fine-mapping
YPFA034_17	BY ubc6-RM pr_Thr TFT	MATa his3∆ ho∆ ubc6-RM pr lyp1Δ::kanMX	a	G418	BY	fine-mapping
YPFA034_18	BY ubc6-D229G_Thr TFT	MATa his3∆ ho∆ ubc6-D229G lyp1Δ::kanMX	a	G418	BY	fine-mapping
YPFA034_19	BY ubc6-RM term_Thr TFT	MATa his3∆ ho∆ ubc6-RM term lyp1Δ::kanMX	a	G418	BY	fine-mapping
YPFA035_19	BY nta1-BY_Asn TFT	MATa his3∆ ho∆ nta1-BY lyp1Δ::kanMX	a	G418	BY	fine-mapping
YPFA035_20	BY nta1-RM_Asn TFT	MATa his3∆ ho∆ nta1-RM lyp1Δ::kanMX	a	G418	BY	fine-mapping
YPFA035_21	BY nta1-RM pr_Asn TFT	MATa his3∆ ho∆ nta1-RM pr lyp1Δ::kanMX	a	G418	BY	fine-mapping
YPFA035_22	BY nta1-D111E_Asn TFT	MATa his3∆ ho∆ nta1-D111E lyp1Δ::kanMX	a	G418	BY	fine-mapping
YPFA035_23	BY nta1-E129G_Asn TFT	MATa his3∆ ho∆ nta1-E129G lyp1Δ::kanMX	a	G418	BY	fine-mapping
