# Supplementary figures and images for: Variation in ubiquitin system genes creates substrate-specific effects on proteasomal protein degradation
Source: eLife journal article supplement (doi:10.7554/elife.79570), 2022-10-11

Arg/N-end Reporters

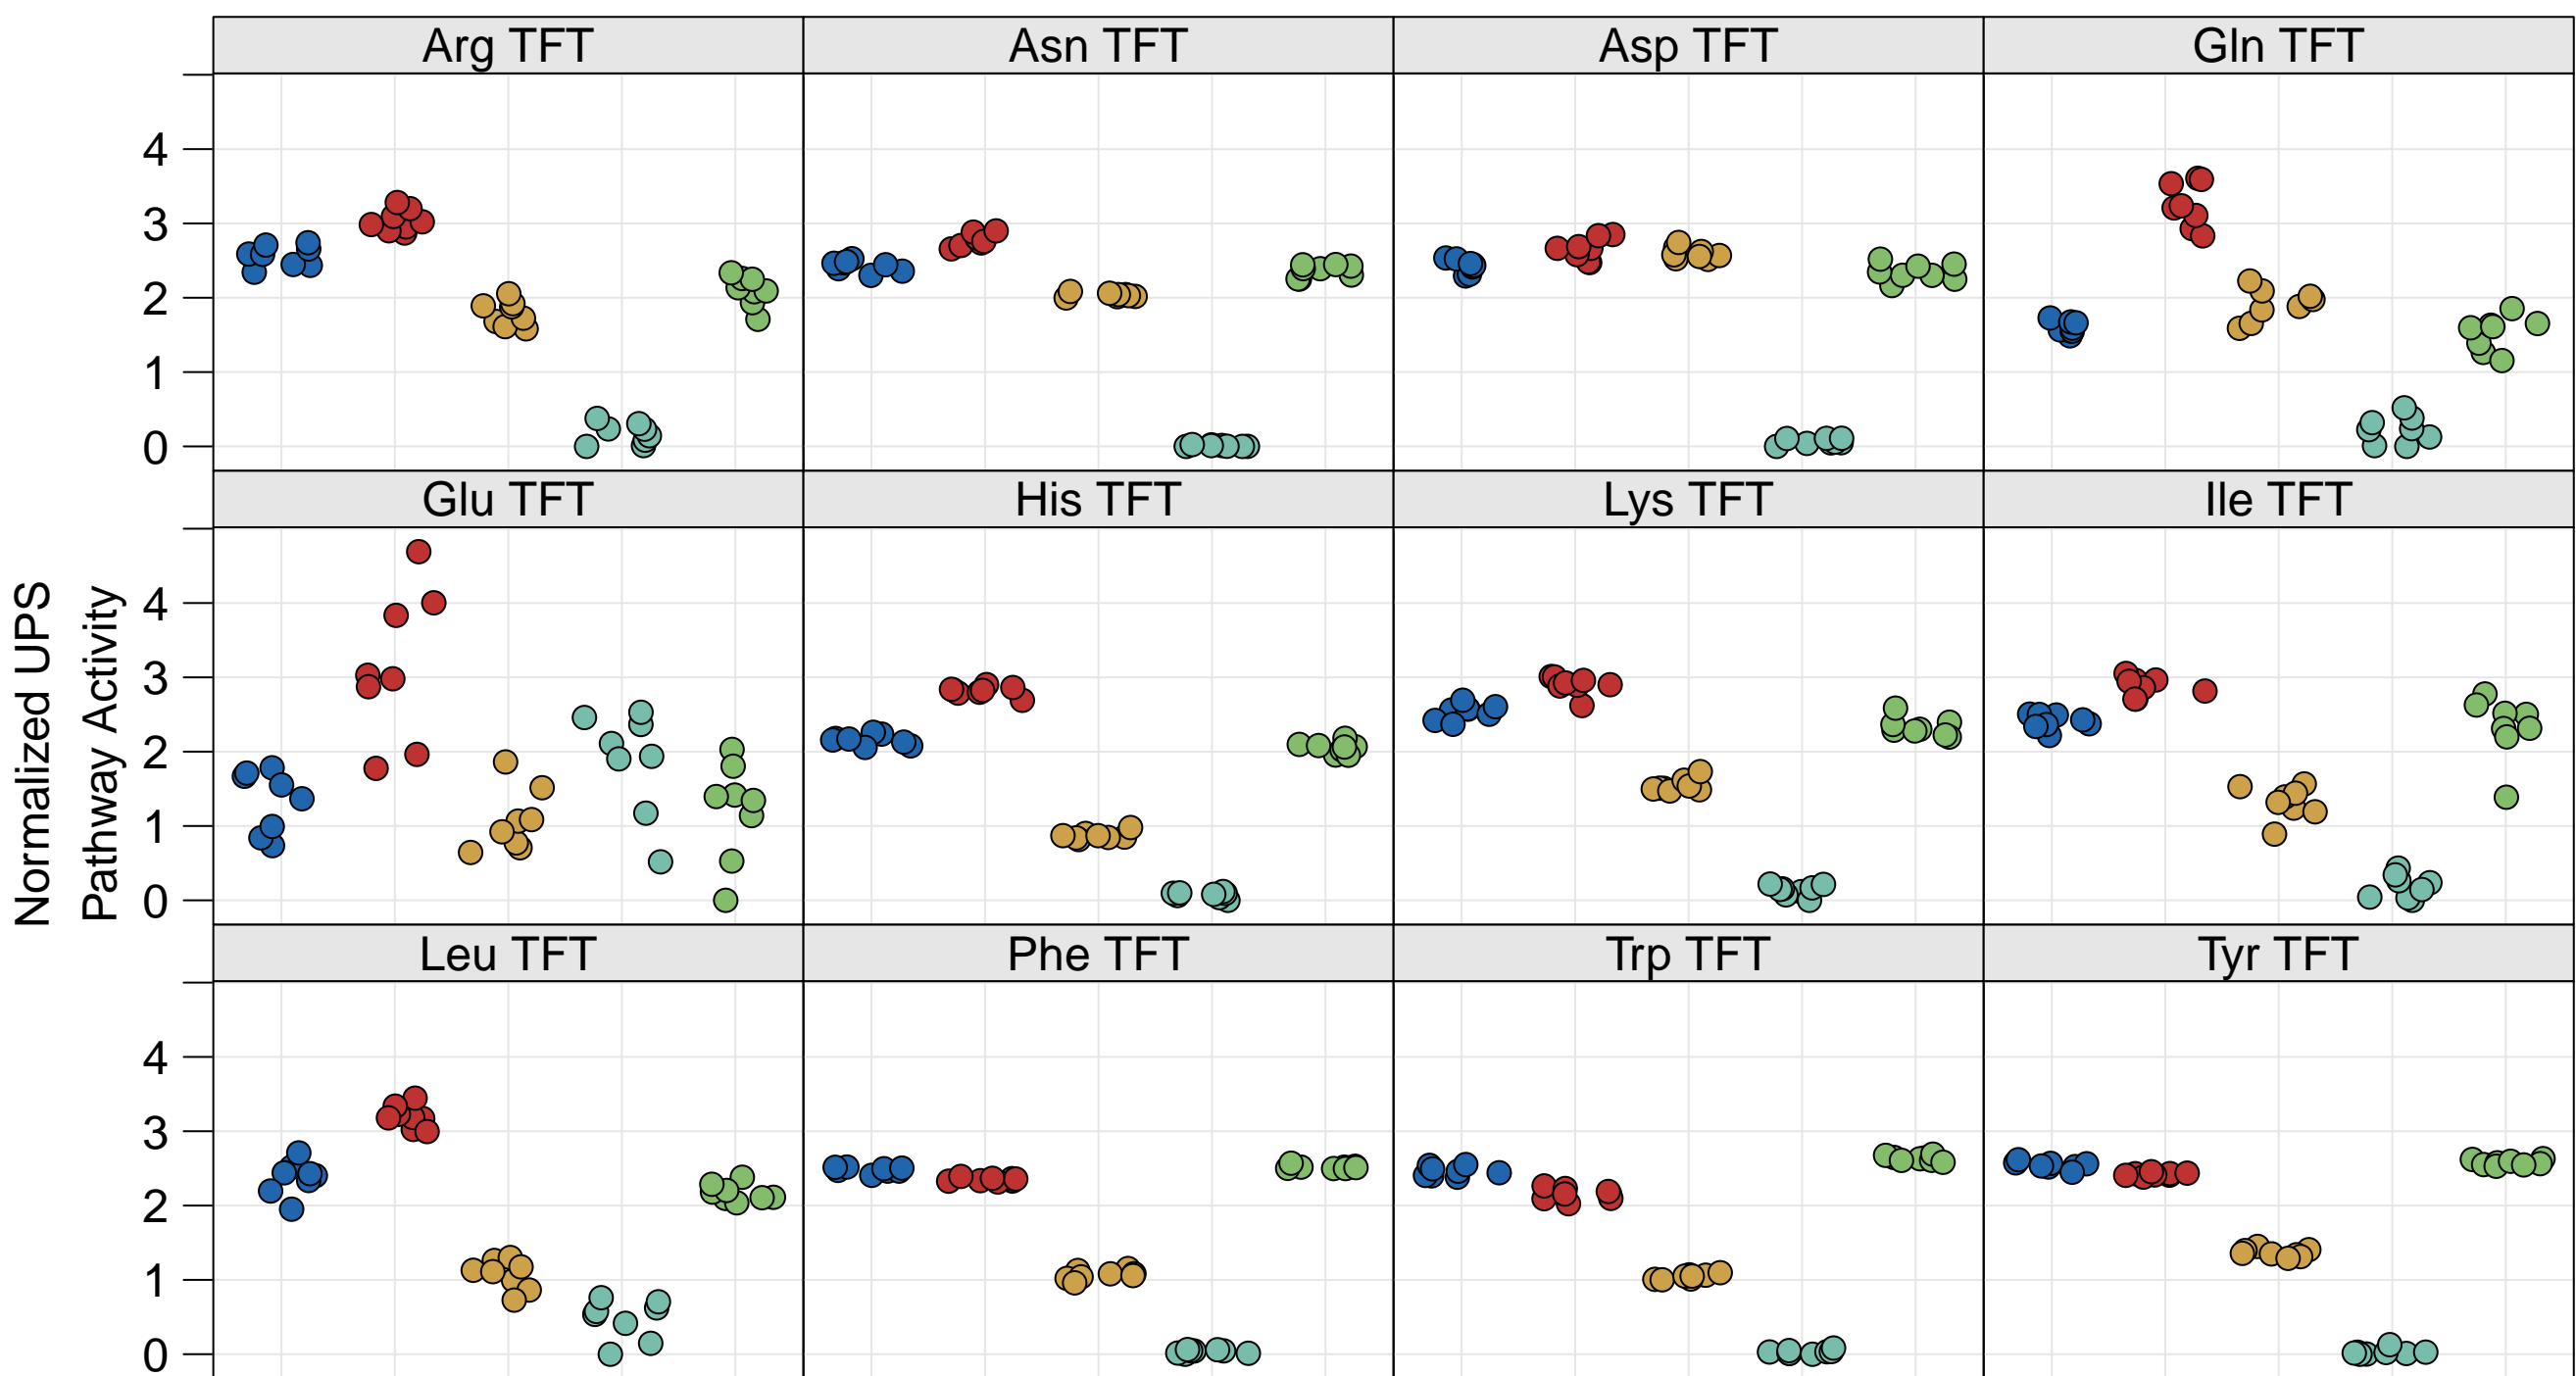

Ac/N-end Reporters

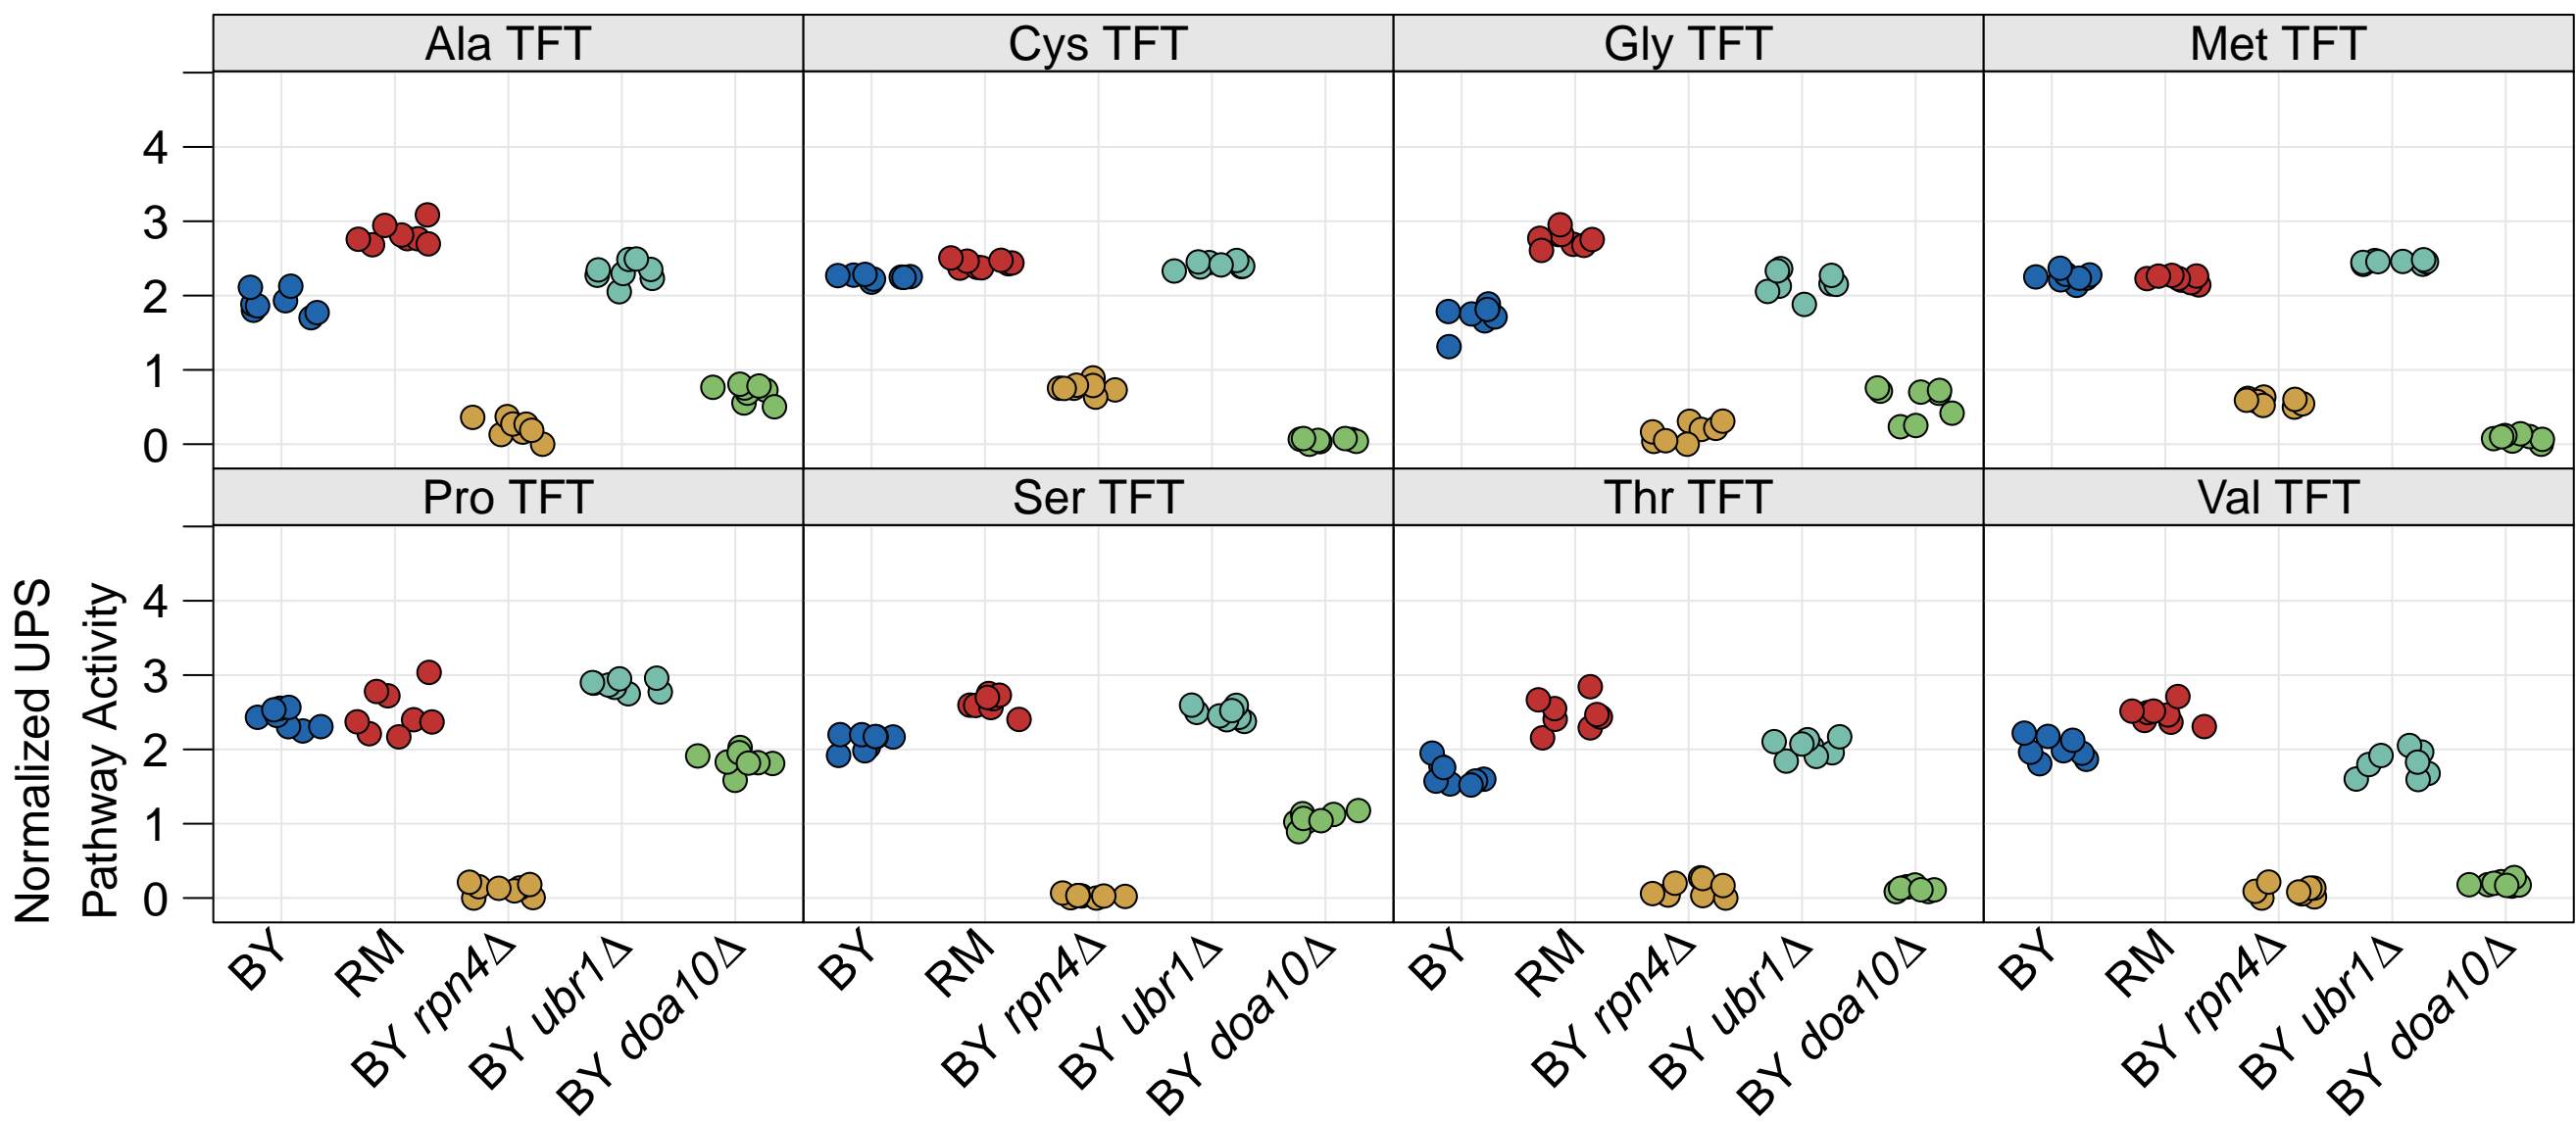

Supplement: supp [file elife_poa_e79570_Figure_1_figure_supplement_1.pdf › elife_poa_e79570_Figure_1_figure_supplement_1.pdf]

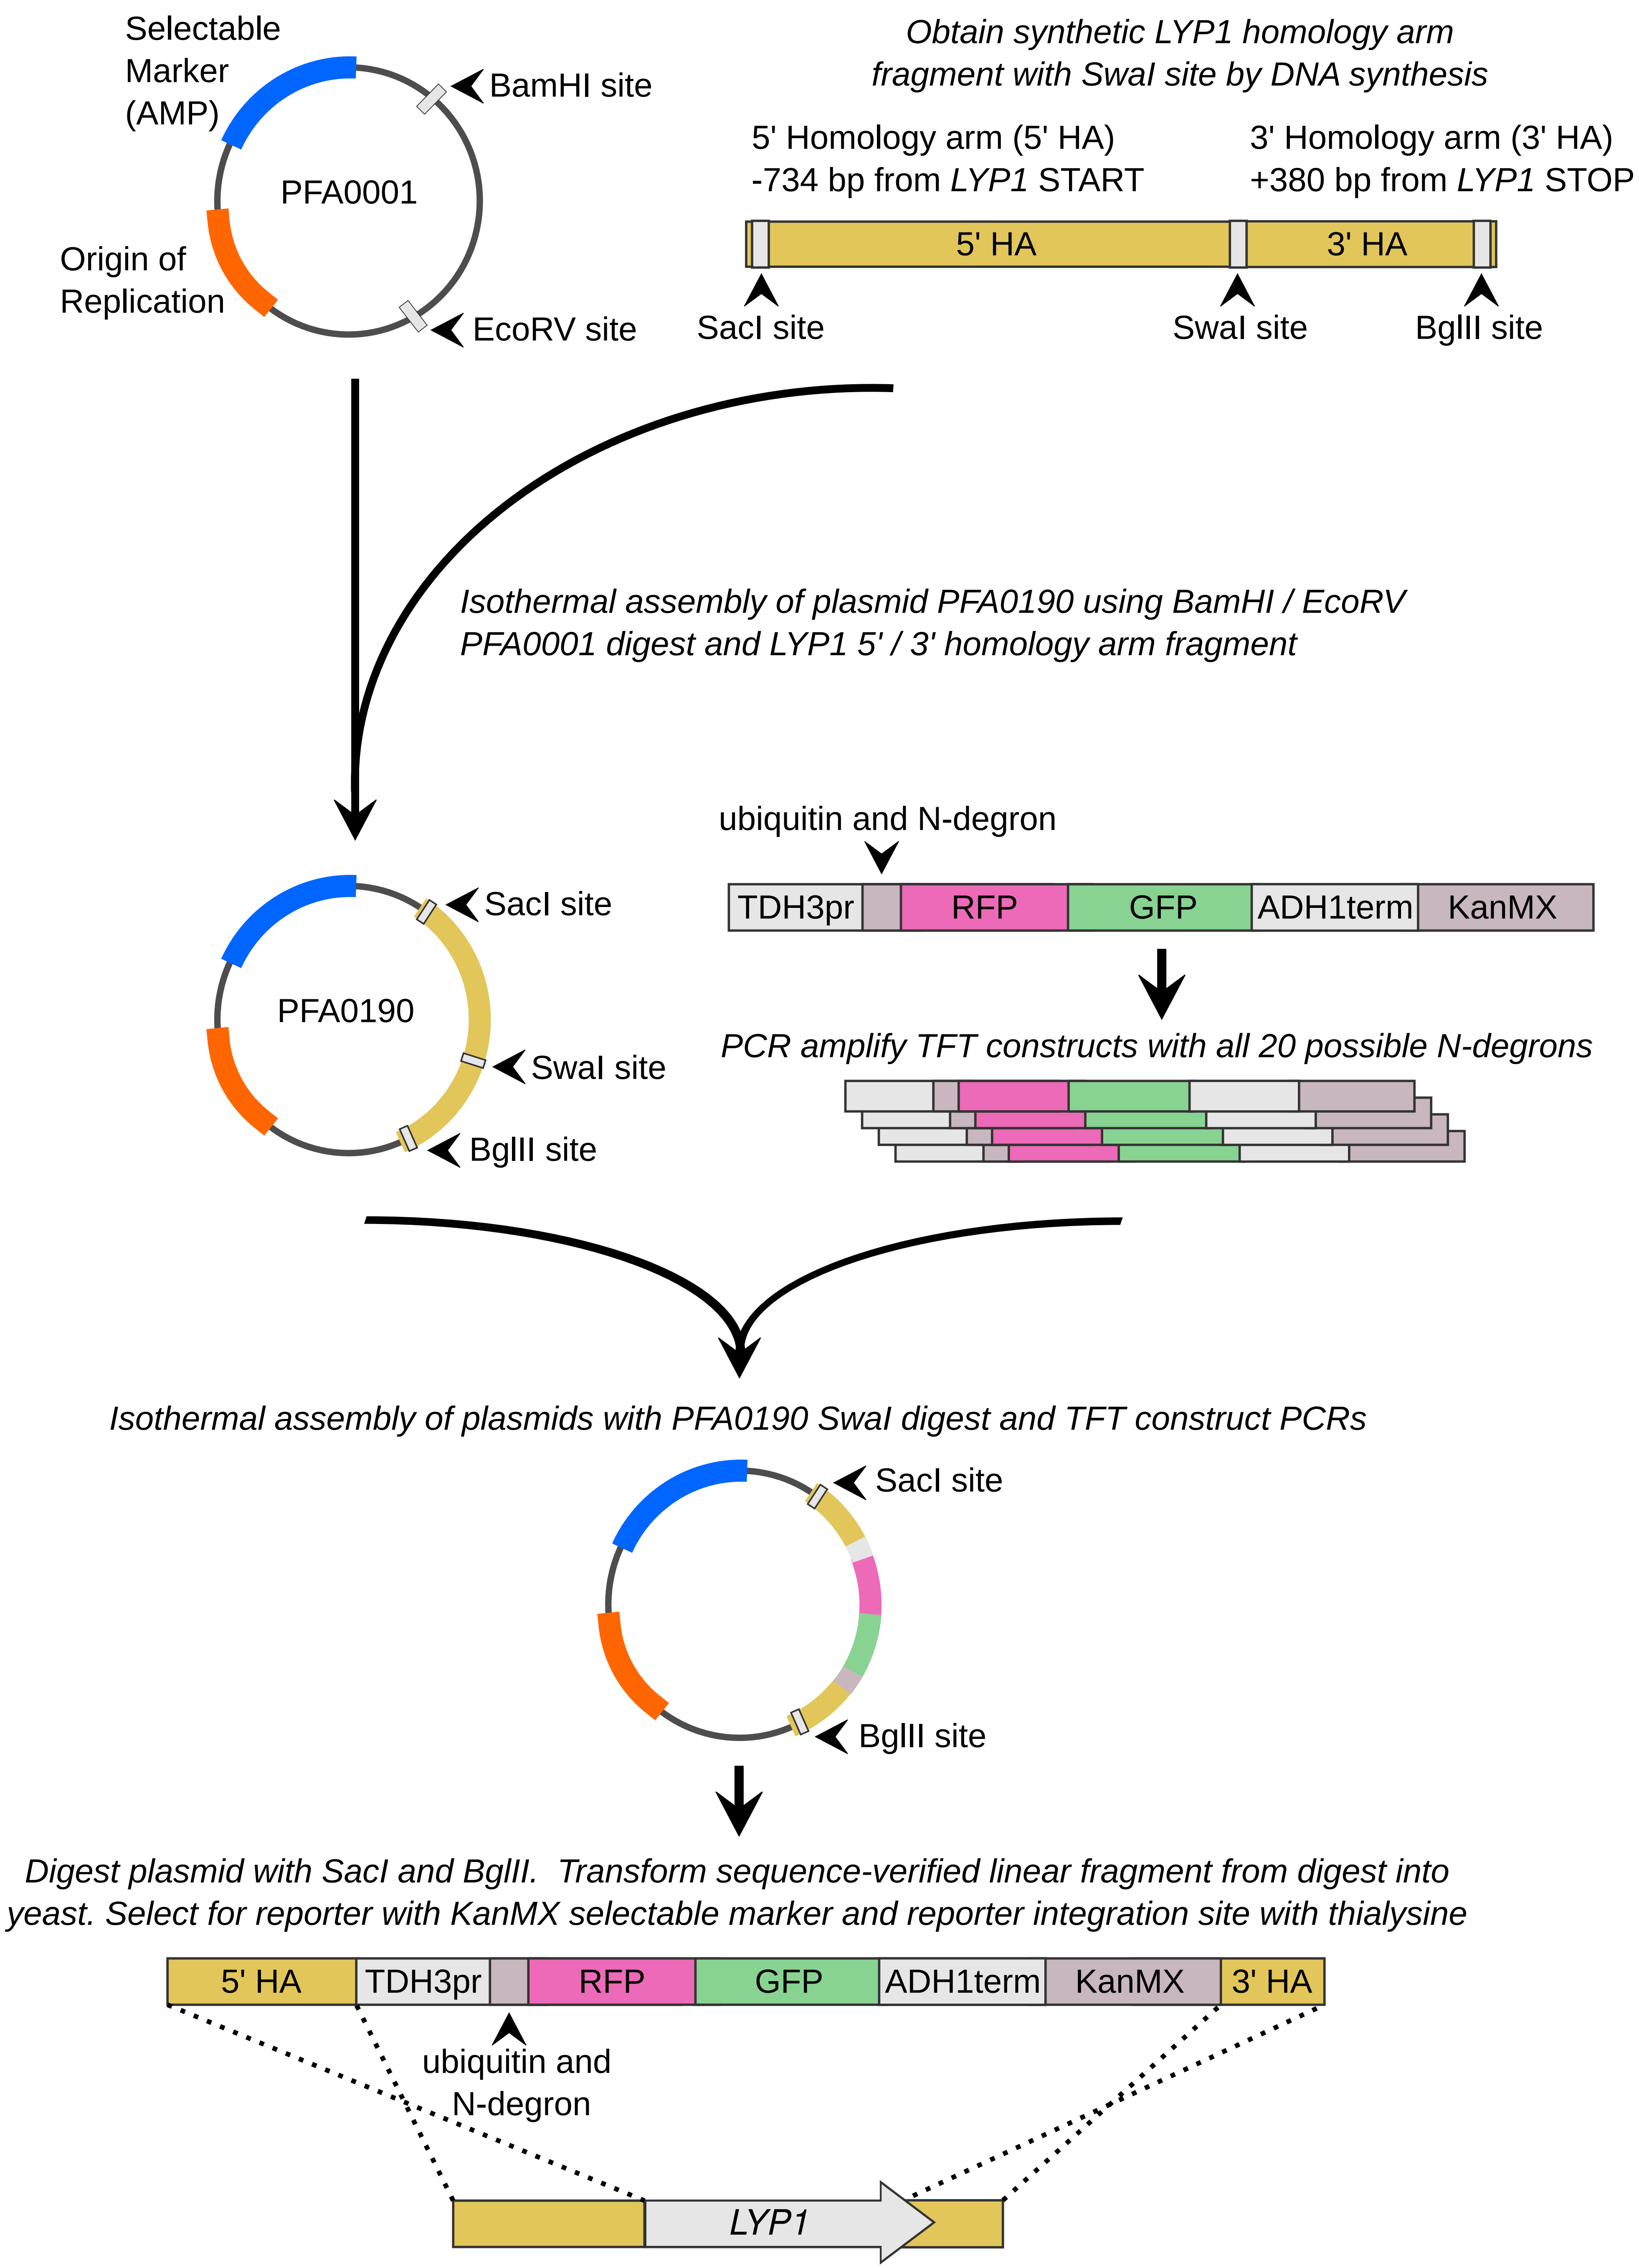

Supplement: supp [file elife_poa_e79570_Figure_1_figure_supplement_2.pdf › elife_poa_e79570_Figure_1_figure_supplement_2.pdf]

**A****Type 1 Arg/N-degrons**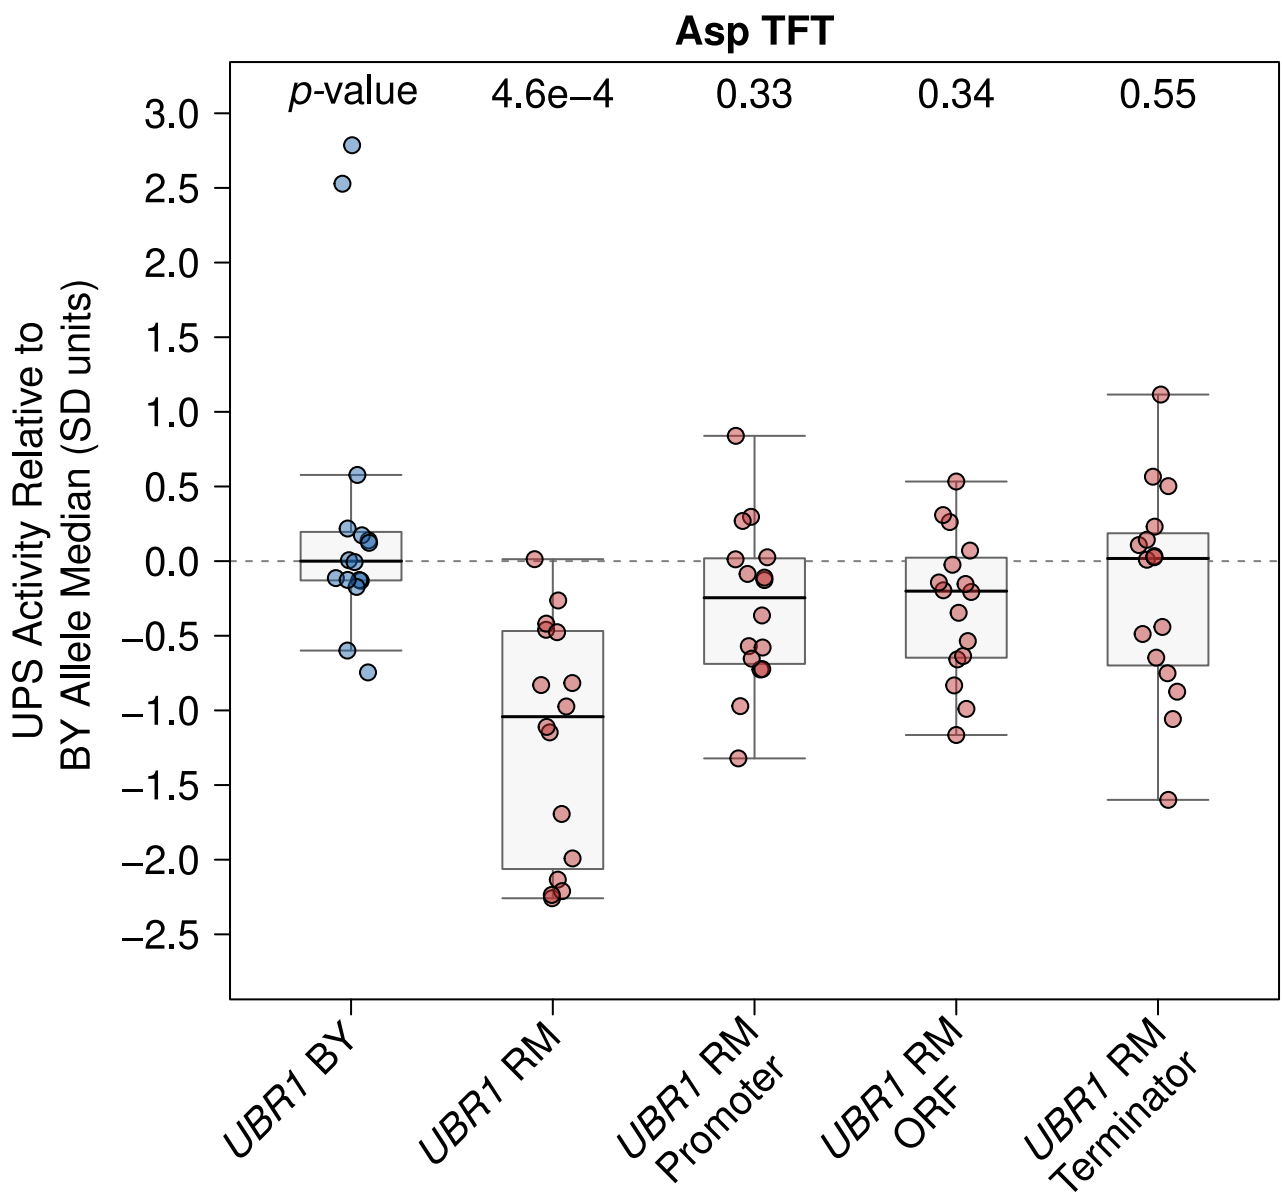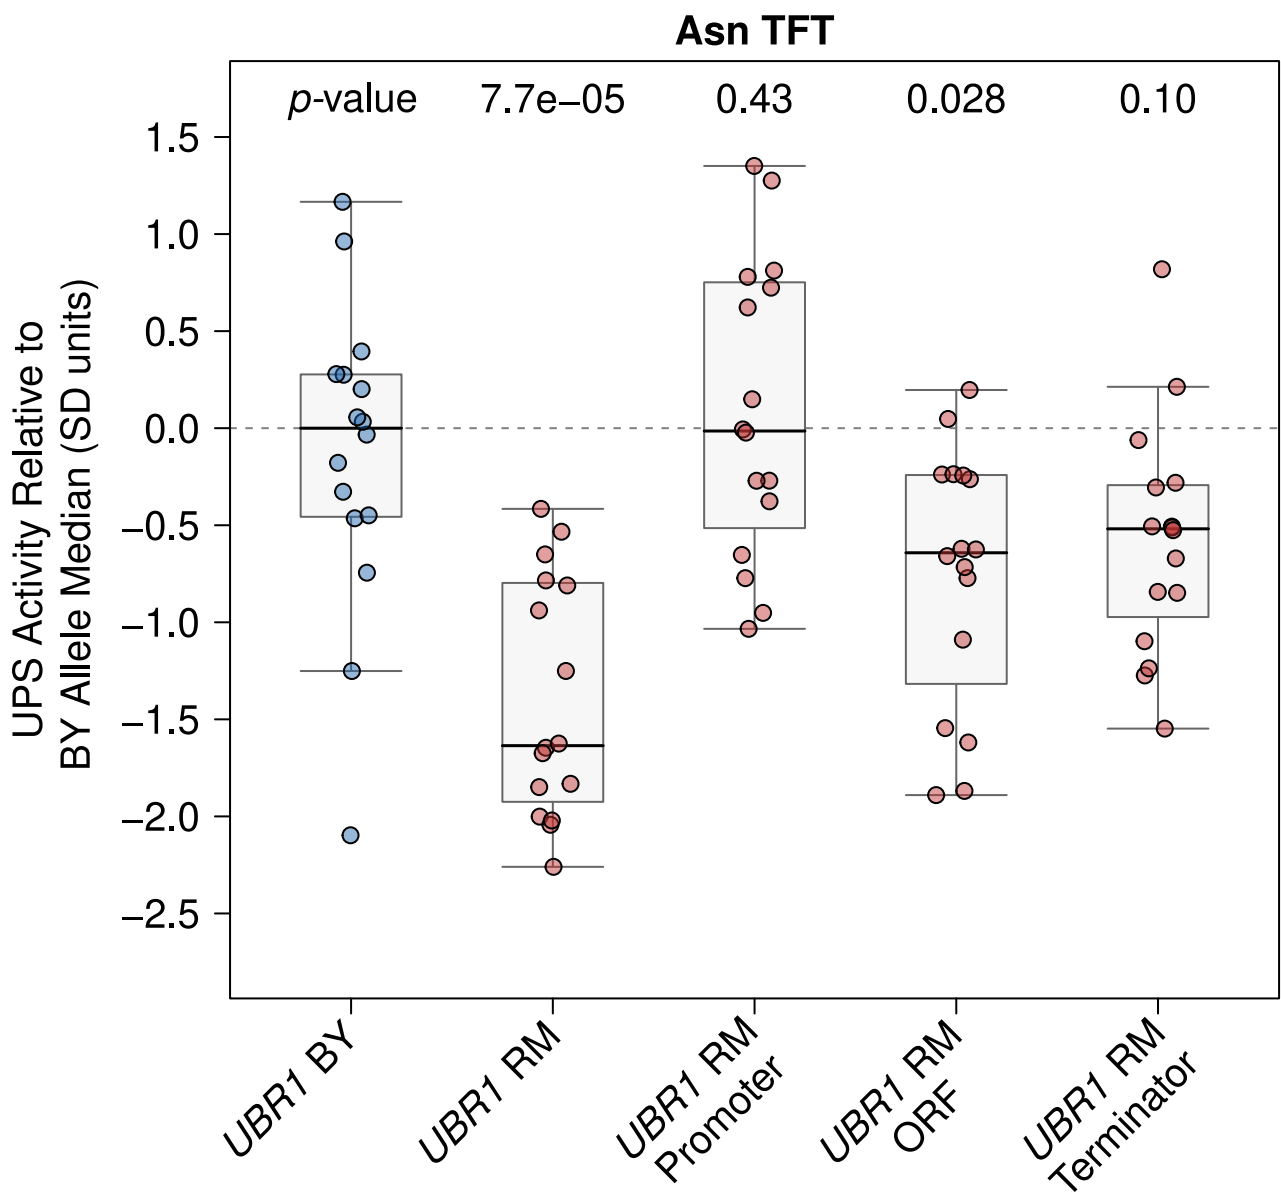**B****Type 2 Arg/N-degrons**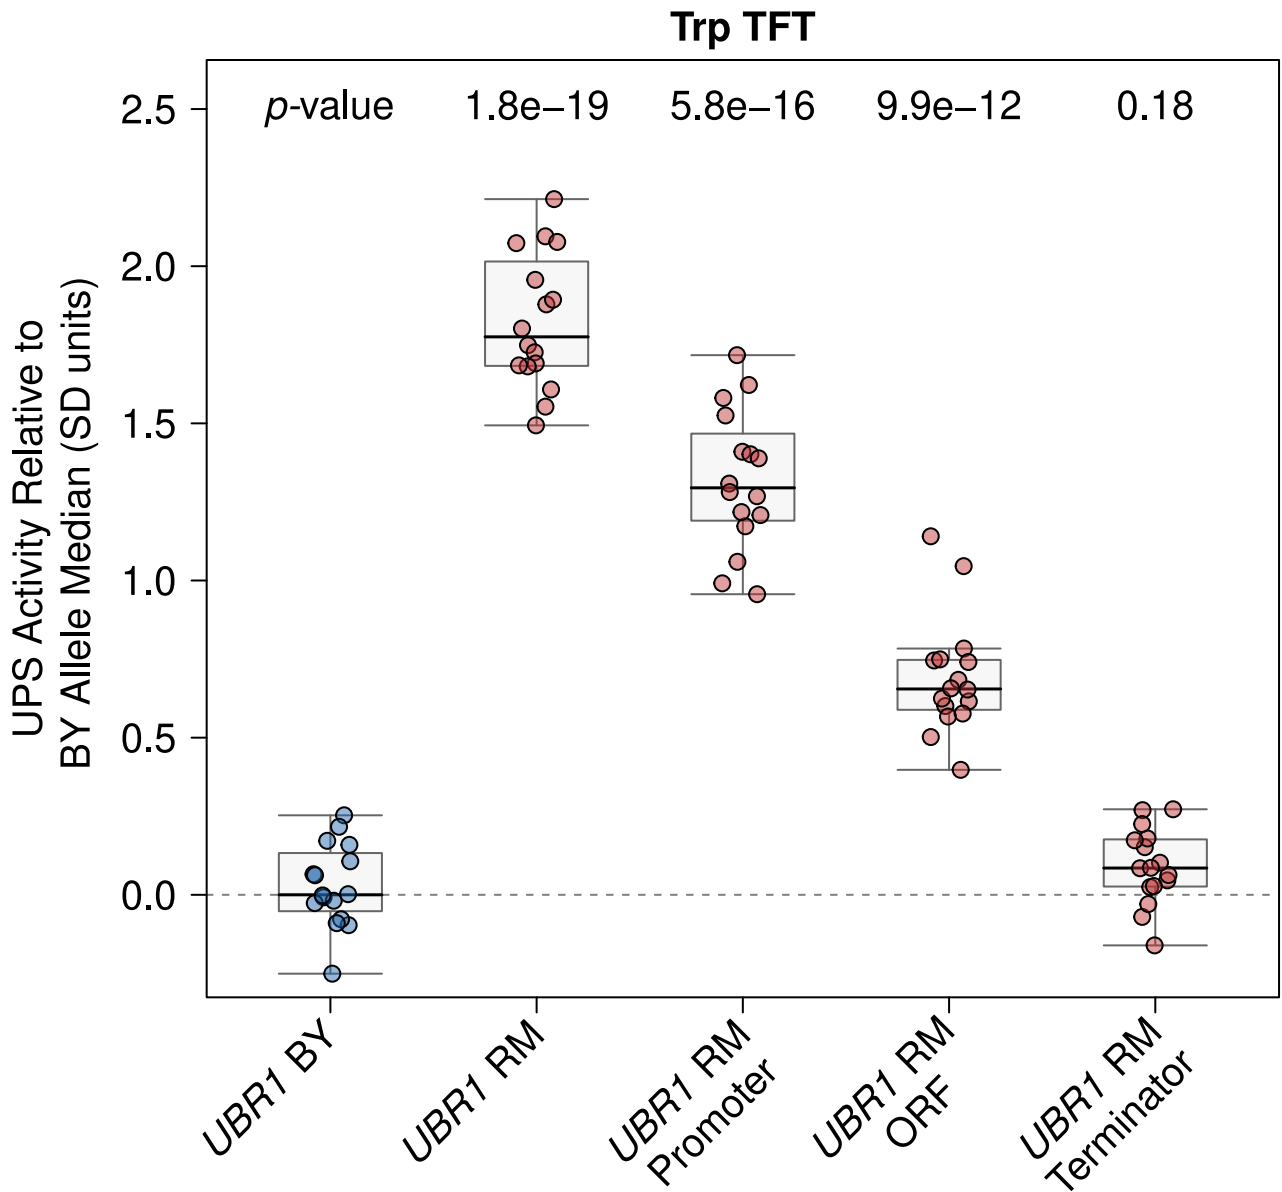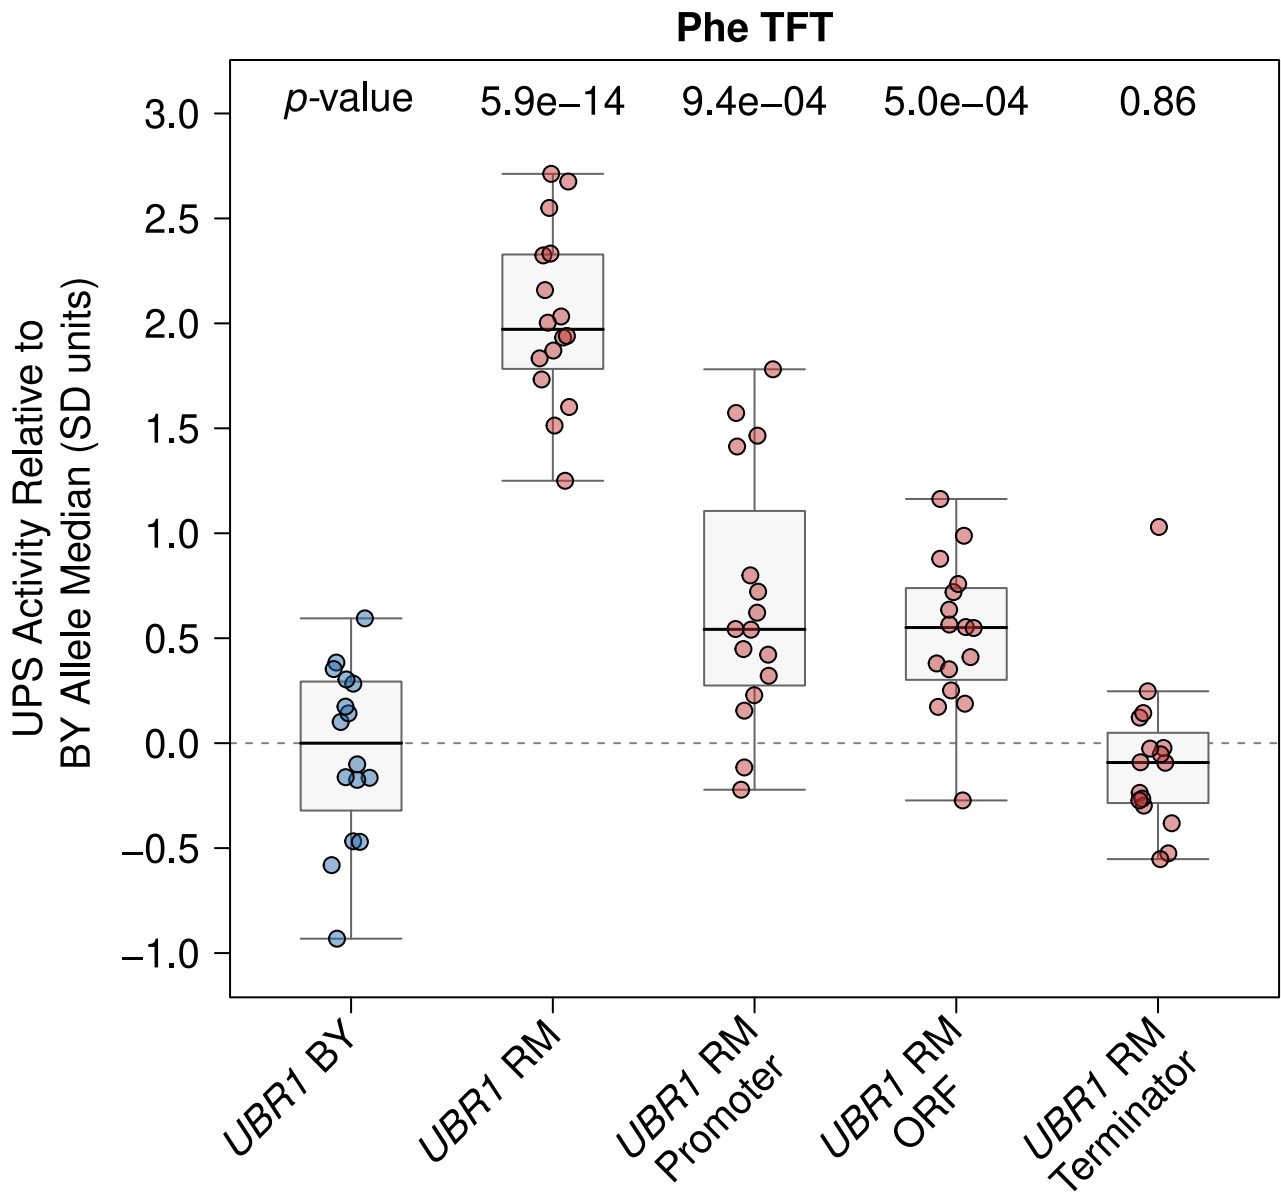

Supplement: supp [file elife_poa_e79570_Figure_3_figure_supplement_1.pdf › elife_poa_e79570_Figure_3_figure_supplement_1.pdf]

# Type 2 Arg/N-degrons

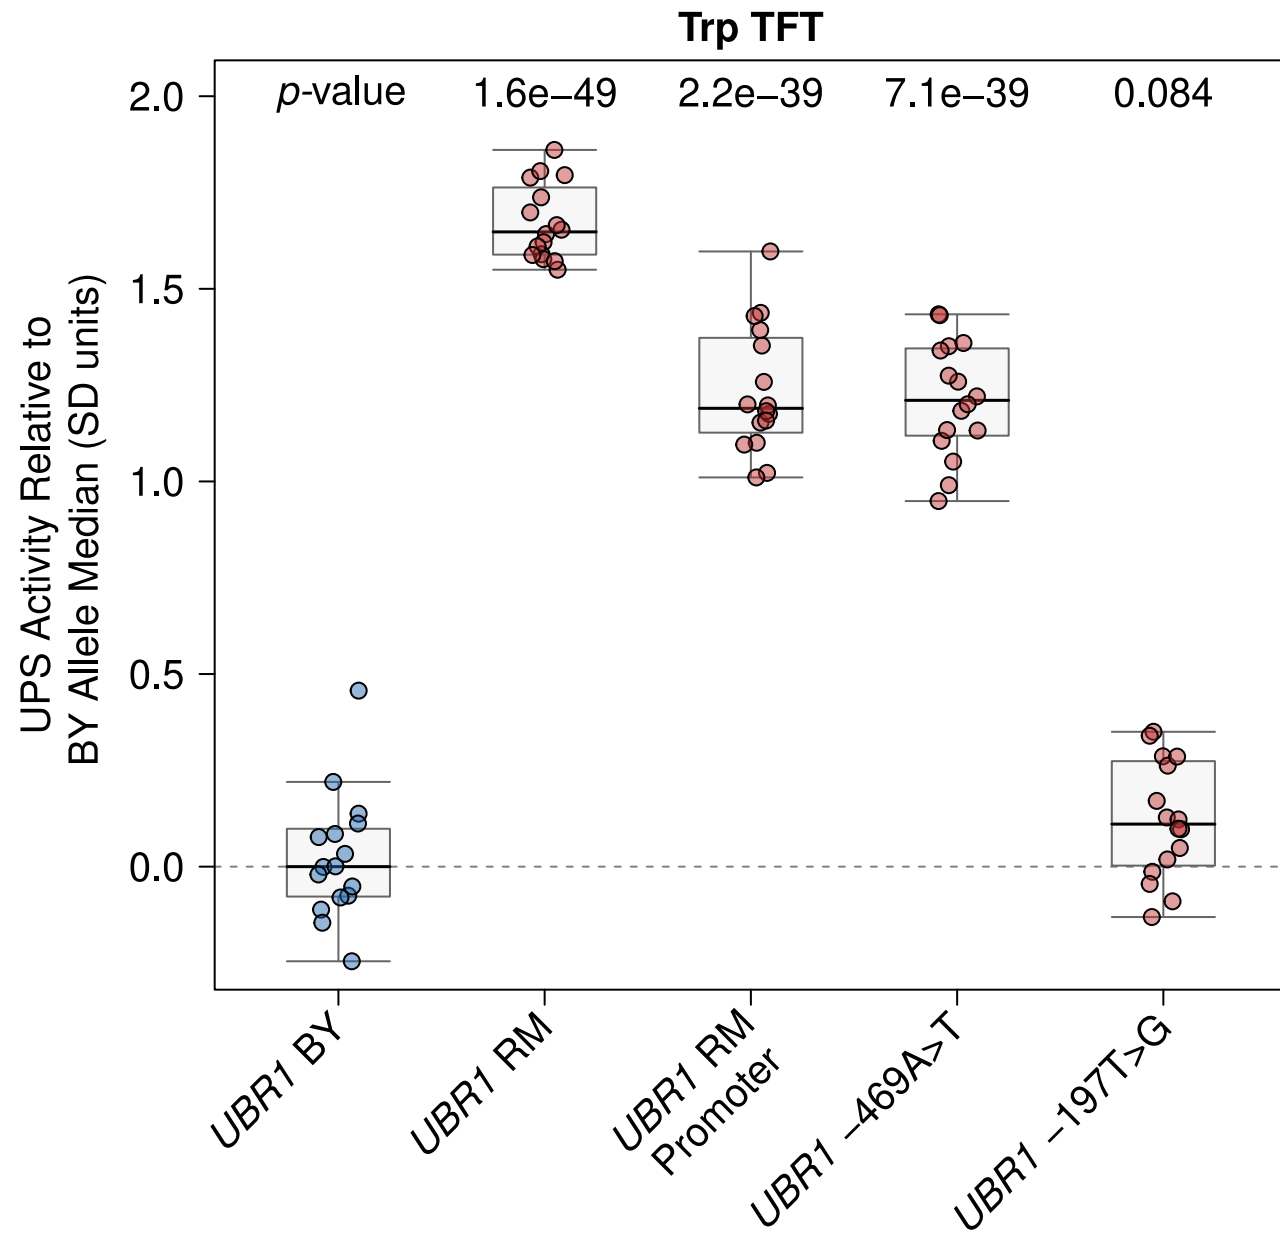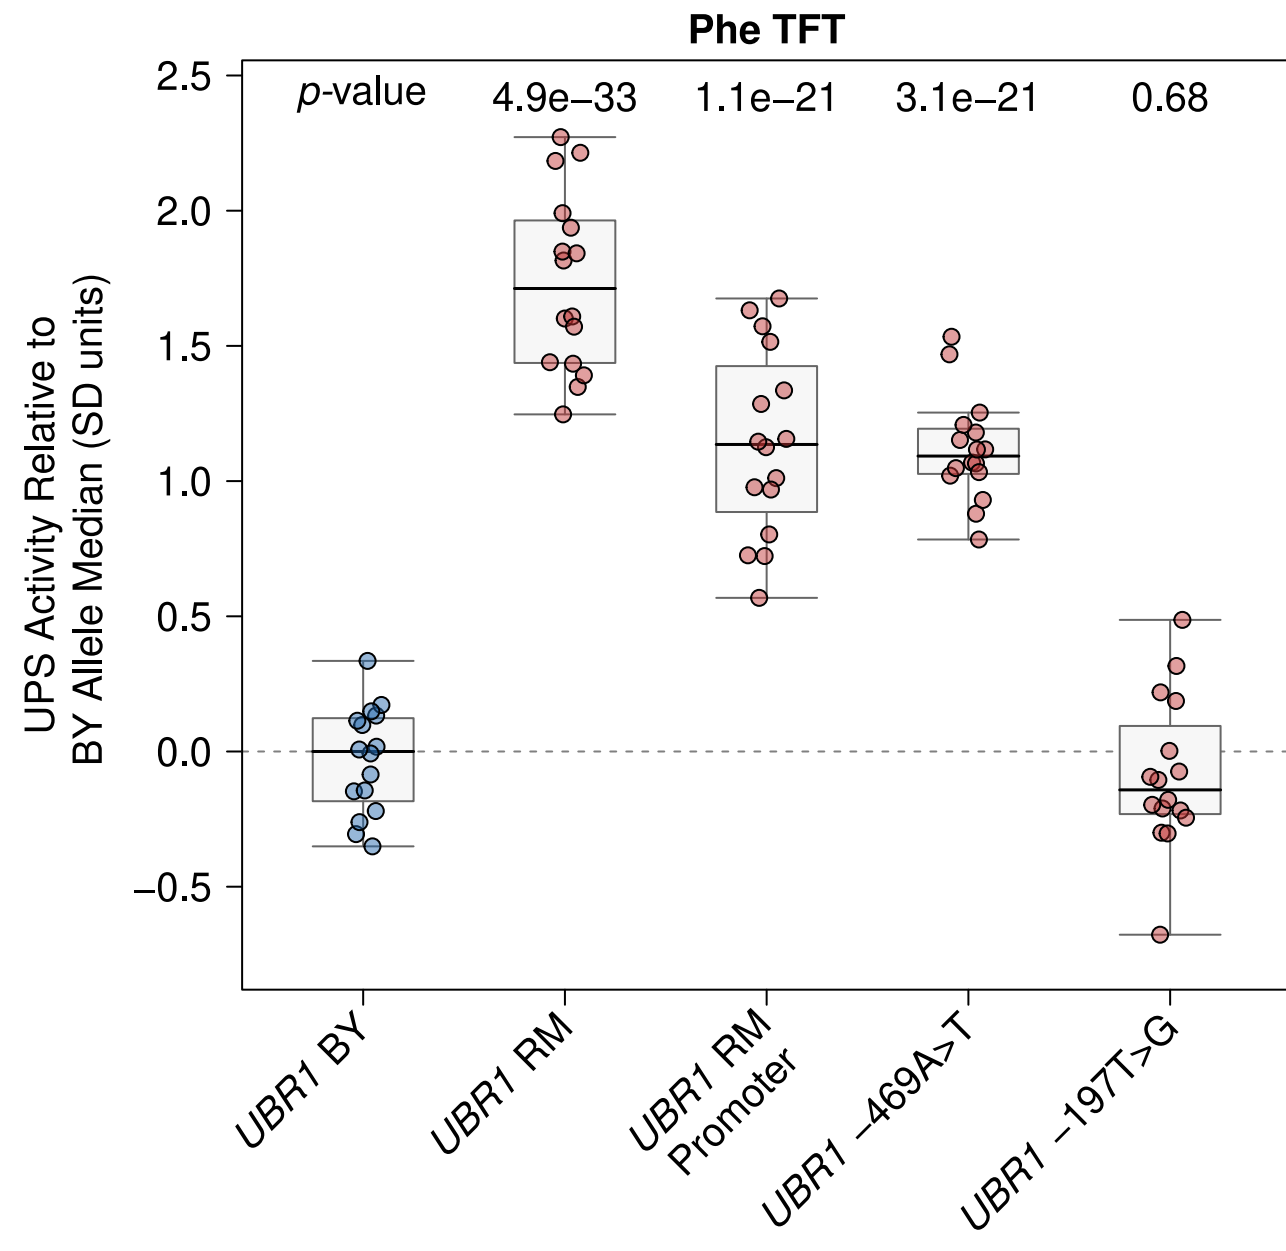

Supplement: supp [file elife_poa_e79570_Figure_3_figure_supplement_2.pdf › elife_poa_e79570_Figure_3_figure_supplement_2.pdf]

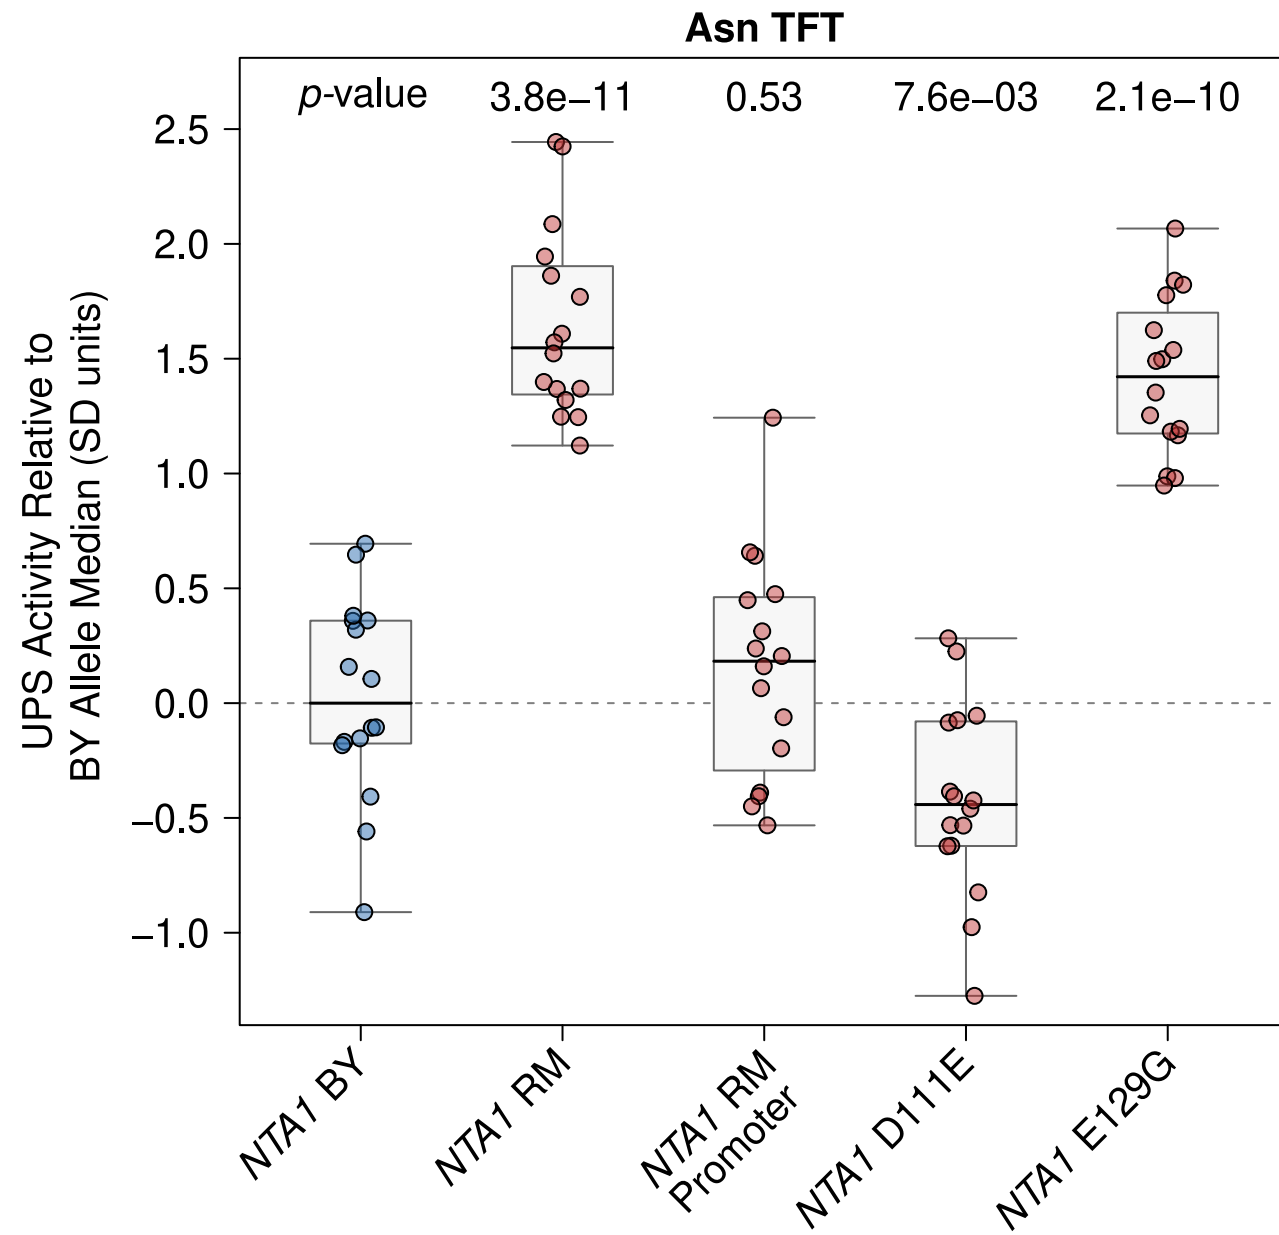

Supplement: supp [file elife_poa_e79570_Figure_4_figure_supplement_1.pdf › elife_poa_e79570_Figure_4_figure_supplement_1.pdf]

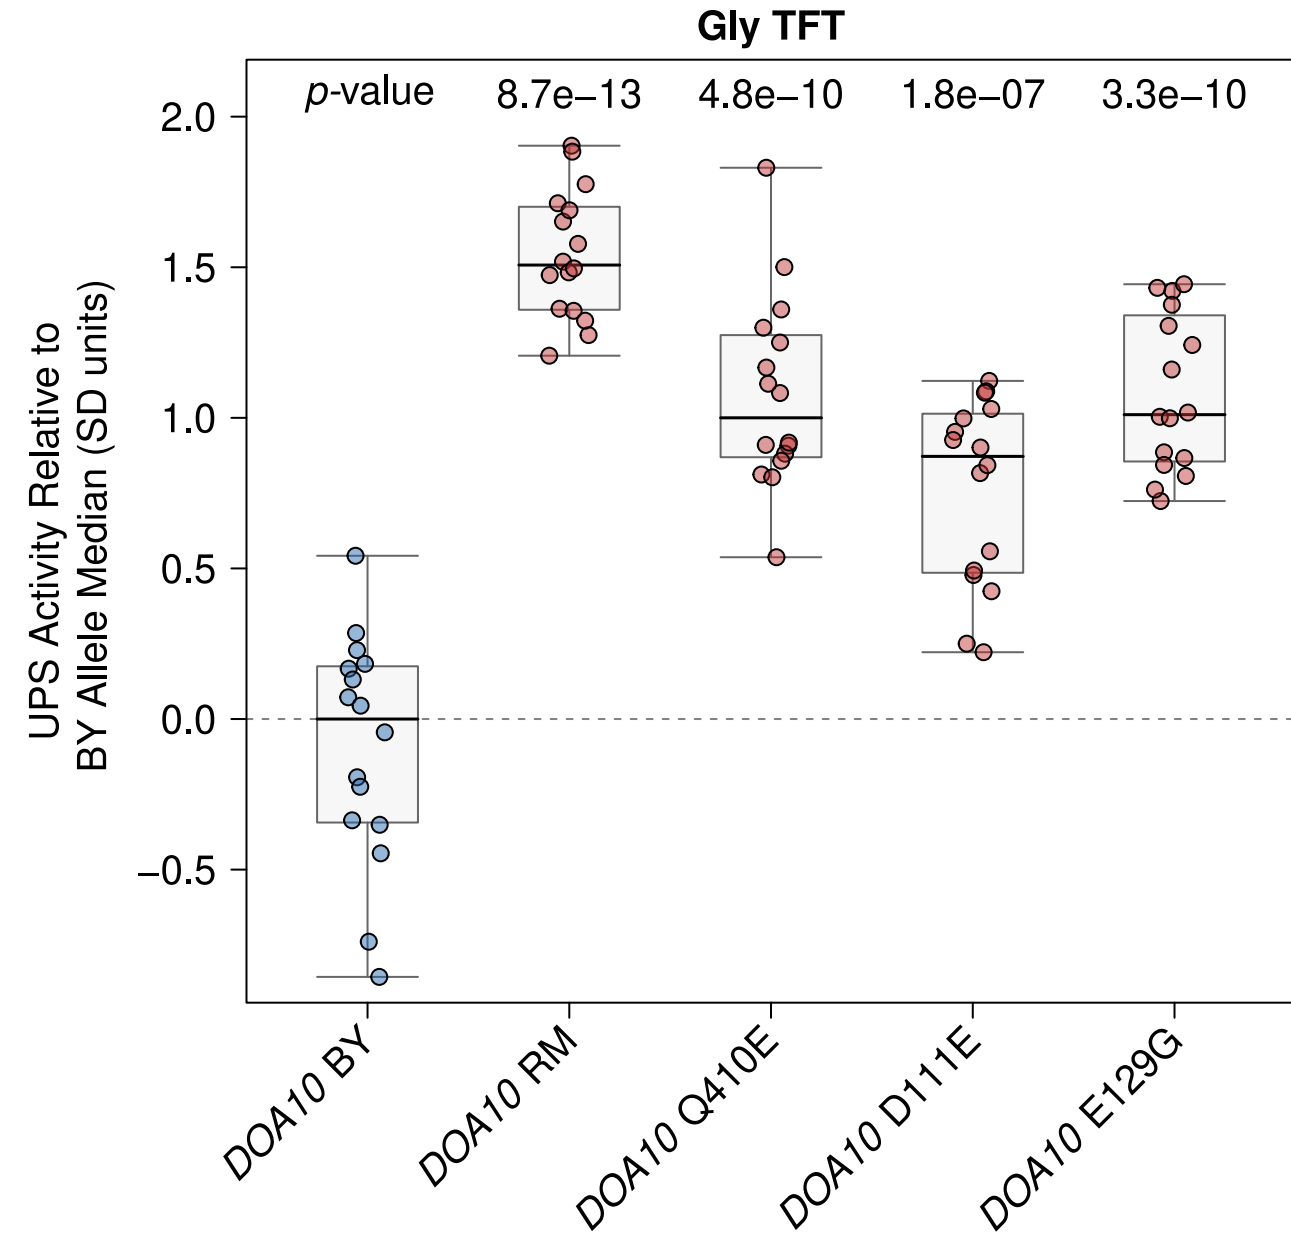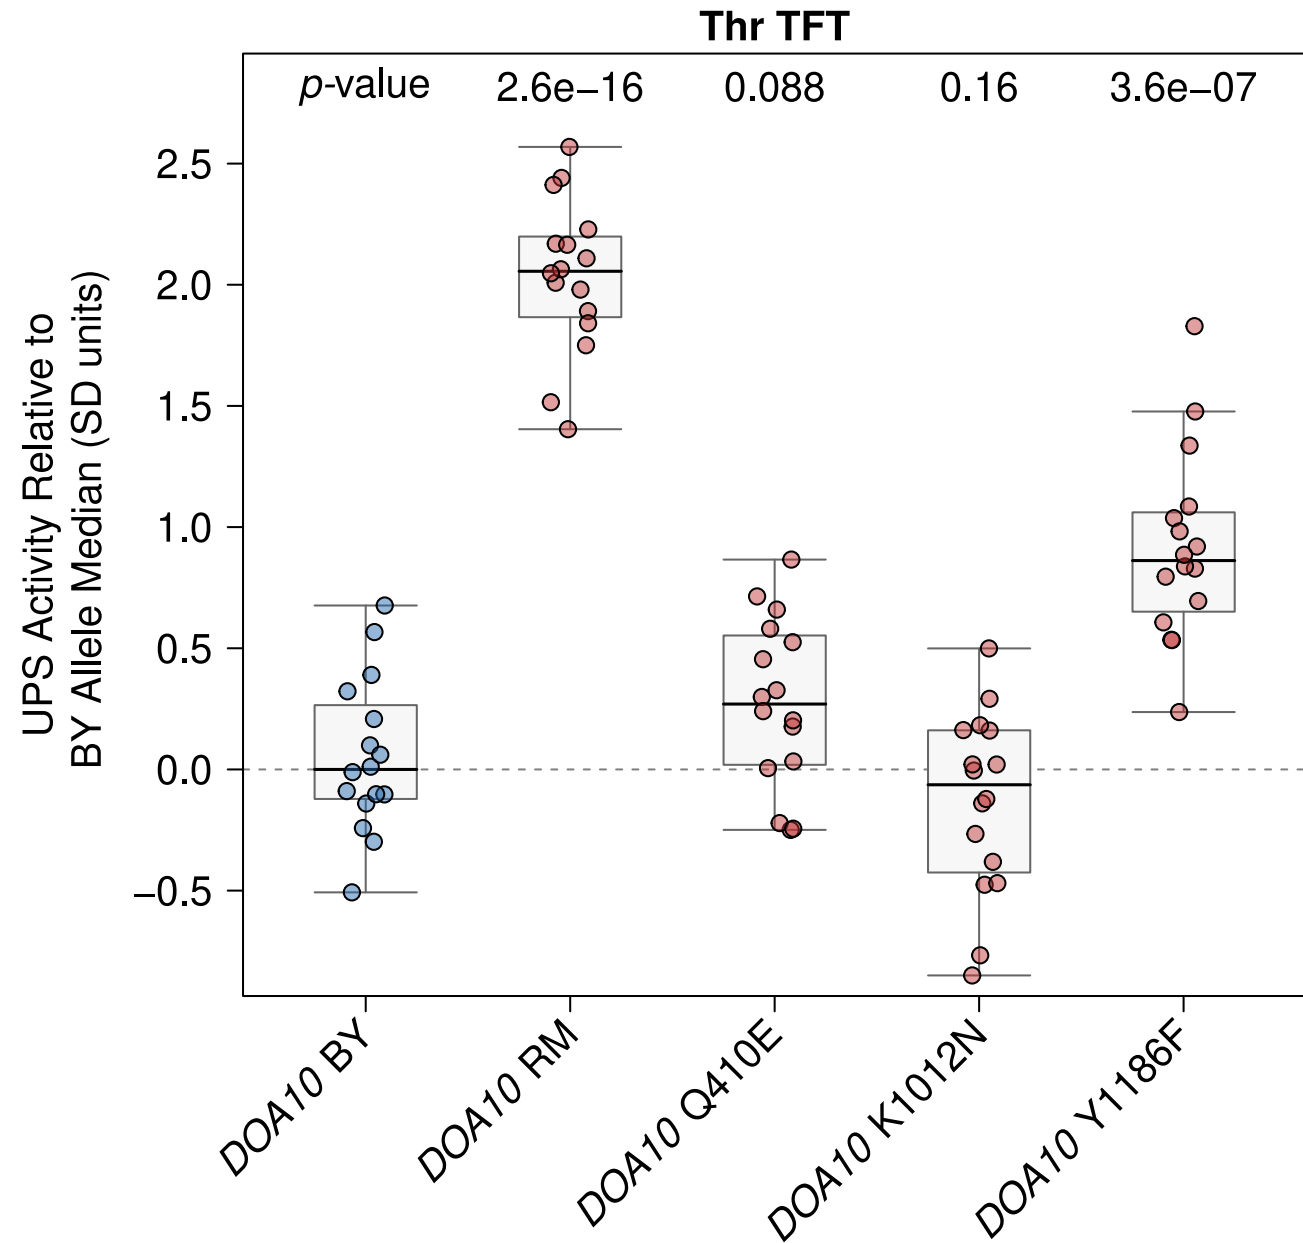

Supplement: supp [file elife_poa_e79570_Figure_4_figure_supplement_2.pdf › elife_poa_e79570_Figure_4_figure_supplement_2.pdf]

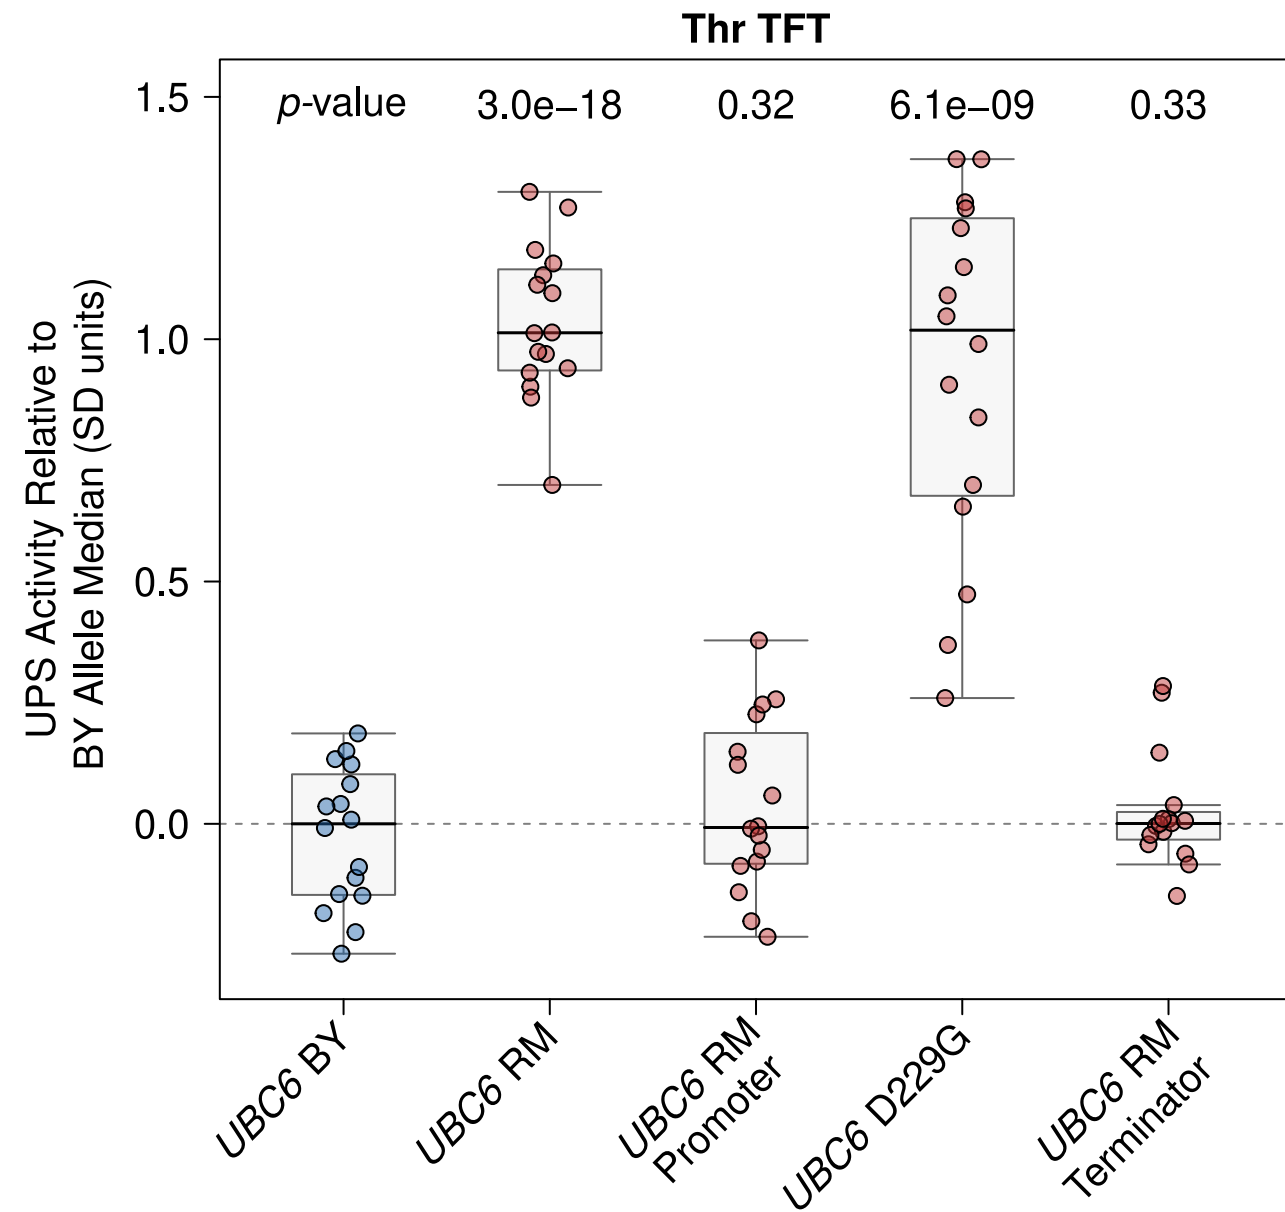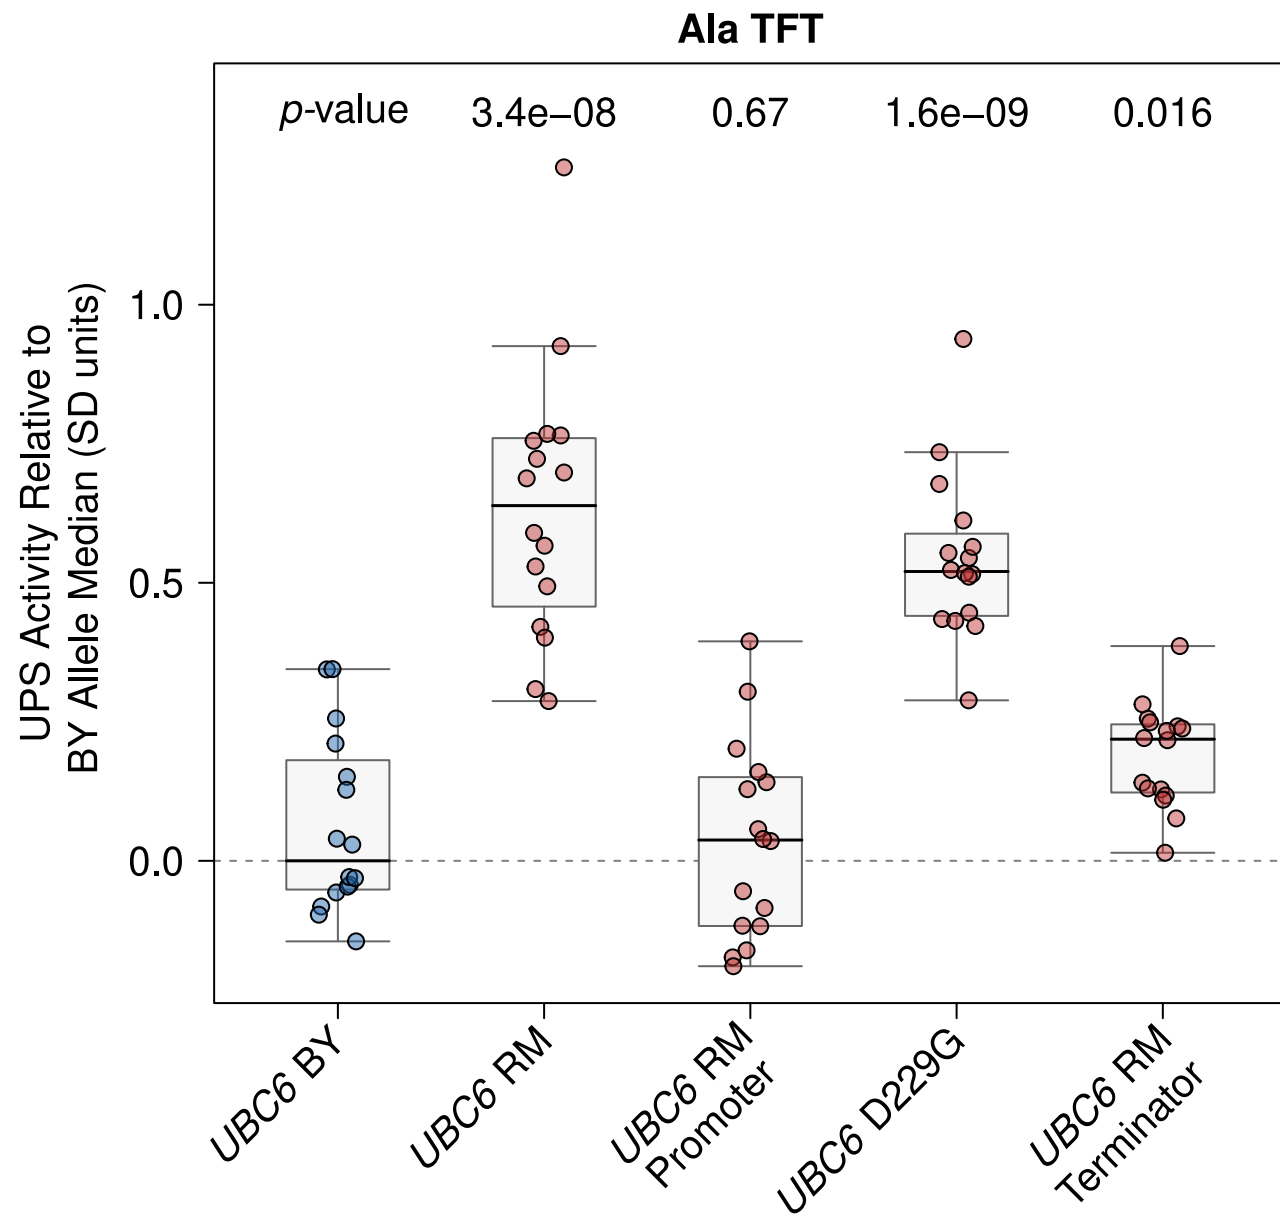

Supplement: supp [file elife_poa_e79570_Figure_4_figure_supplement_3.pdf › elife_poa_e79570_Figure_4_figure_supplement_3.pdf]

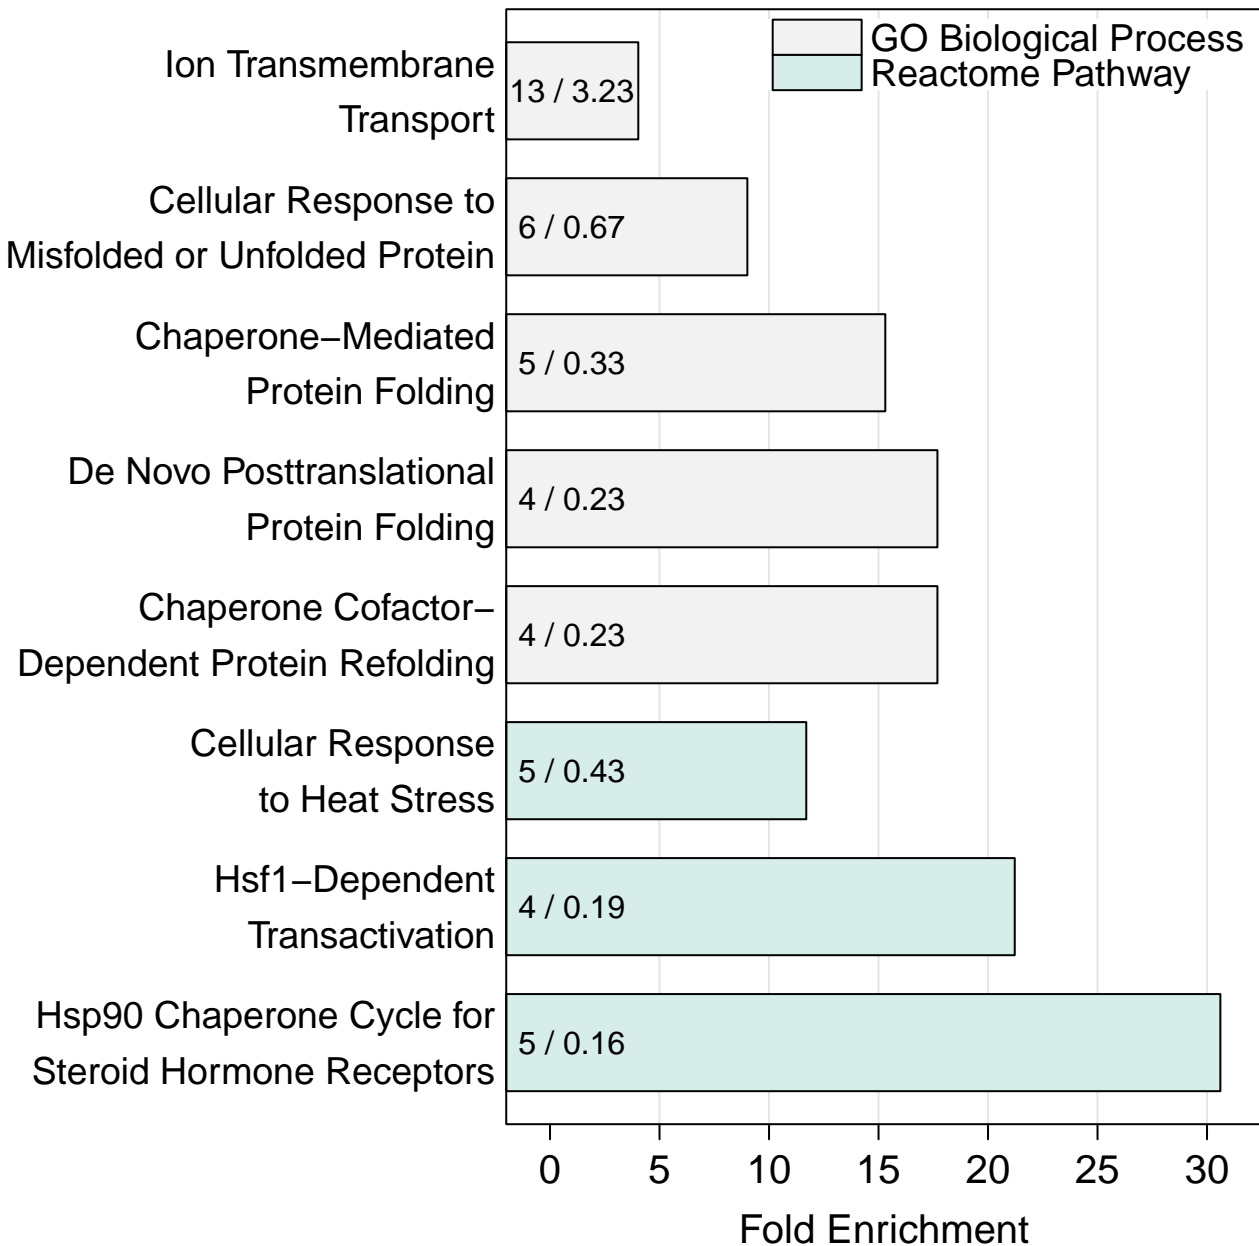

Supplement: supp [file elife_poa_e79570_Figure_5_figure_supplement_1.pdf › elife_poa_e79570_Figure_5_figure_supplement_1.pdf]
